# Supplementary material for: Analysis of an Intrinsic Mycovirus Associated With Reduced Virulence of the Human Pathogenic Fungus Aspergillus fumigatus
Source: Front Microbiol. 2020 Jan 17;10:3045. doi: 10.3389/fmicb.2019.03045 (PMC6978690; doi:10.3389/fmicb.2019.03045)
Supplement: TABLE S2 — Total and integrated information of up- or down-regulated genes by virus infection. (A,B) Lists of the (A) down-regulated and (B) up-regulated A. fumigatus genes in the AfuCV41362 virus-infected strain in comparison to the virus-free strain at 4 h (swelling stage). ∗ indicates hypoxia-induced genes reported in previous work (Kroll et al., 2014). (C,D) Lists of the (C) down-regulated and (D) up-regulated A. fumigatus genes in the AfuCV41362 virus-infected strain in comparison to the virus-free strain on day 6 (conidia-forming stage). (E) Estimated numbers of genes regulated by mycovirus infection. (F,G) Genes commonly down-regulated and up-regulated, respectively, at 4 h (swelling stage; F) and day 6 (conidia-forming stage; G). The functional catalog data are also provided in H. Changes of expression levels in RNA-silencing related, dicer- and argonaute-like genes. Fold reductions are free/virus-infected. [file Table_1.XLSX]

## Sheet: TableS2A
4h down			Expression value				GO analysis							4h down	FunCat
Feature ID	Product	列2	Free	Virus	Fold change	列1	Protein name	GO ID	GO name	GO namespace	Evidence code	Exact p-value	Adjusted p-value	Feature ID2	Protein name2	FunCat ID	FunCat description	FunCat main category	Exact p-value2	Adjusted p-value3
AFUA_6G04920	NAD-dependent formate dehydrogenase AciA/Fdh		4749.02	10.49	452.77		NAD-dependent formate dehydrogenase AciA/Fdh (EC 1.2.1.2)	GO:0055114	oxidation-reduction process	BP	IEA	7.8355e-8	6.6367e-05	AFUA_6G04920	NAD-dependent formate dehydrogenase AciA/Fdh (EC 1.2.1.2)	1.05	C-compound and carbohydrate metabolism	Metabolism	2.515e-06	0.0010864
AFUA_7G02010	indoleamine 2,3-dioxygenase family protein		1952.42	4.42	441.59		Indoleamine 2,3-dioxygenase family protein (EC 1.13.11.-)	GO:0055114	oxidation-reduction process	BP	IEA	7.8355e-8	6.6367e-05	AFUA_7G02010	Indoleamine 2,3-dioxygenase family protein (EC 1.13.11.-)	16.21.01	heme binding	Protein with binding function or cofactor requirement (structural or analytic)	0.013841	0.25499
AFUA_7G05070	FAD dependent oxidoreductase, putative	*	931.18	2.27	410.2		FAD dependent oxidoreductase, putative (EC 1.3.99.1)	GO:0055114	oxidation-reduction process	BP	IEA	7.8355e-8	6.6367e-05	AFUA_7G05070	FAD dependent oxidoreductase, putative (EC 1.3.99.1)	1.05	C-compound and carbohydrate metabolism	Metabolism	2.515e-06	0.0010864
AFUA_3G11070	pyruvate decarboxylase PdcA, putative	*	9125.2	28.91	315.61		Pyruvate decarboxylase (EC 4.1.1.1)	GO:0005575	cellular_component	CC	ND	3.3105e-7	9.3467e-05	AFUA_3G11070	Pyruvate decarboxylase (EC 4.1.1.1)	1.05	C-compound and carbohydrate metabolism	Metabolism	2.515e-06	0.0010864
AFUA_5G05640	RTA1 domain protein, putative	*	890.85	3.92	227.03		#N/A	#N/A	#N/A	#N/A	#N/A	#N/A	#N/A	AFUA_5G05640	RTA1 domain protein, putative	20.01.13	lipid/fatty acid transport	Cellular transport, transport facilitation and transport routes	0.048237	0.48136
AFUA_5G10070	3-hydroxyacyl-CoA dehydrogenase, putative	*	342.1	1.89	180.59		3-hydroxyacyl-CoA dehydrogenase, putative (EC 1.1.1.-)	GO:0055114	oxidation-reduction process	BP	IEA	7.8355e-8	6.6367e-05	AFUA_5G10070	3-hydroxyacyl-CoA dehydrogenase, putative (EC 1.1.1.-)	1.06	lipid, fatty acid and isoprenoid metabolism	Metabolism	4.5362e-06	0.0010864
AFUA_4G09250	conserved hypothetical protein		5271.8	31.21	168.9		#N/A	#N/A	#N/A	#N/A	#N/A	#N/A	#N/A	AFUA_4G09250	#N/A	#N/A	#N/A	#N/A	#N/A	#N/A
AFUA_5G06240	alcohol dehydrogenase, putative	*	6651.59	40.69	163.46		Alcohol dehydrogenase, putative (EC 1.1.1.1)	GO:0055114	oxidation-reduction process	BP	IEA	7.8355e-8	6.6367e-05	AFUA_5G06240	Alcohol dehydrogenase, putative (EC 1.1.1.1)	1.05	C-compound and carbohydrate metabolism	Metabolism	2.515e-06	0.0010864
AFUA_1G09030	conserved hypothetical protein		1179.43	7.58	155.65		Uncharacterized protein	GO:0005575	cellular_component	CC	ND	3.3105e-7	9.3467e-05	AFUA_1G09030	#N/A	#N/A	#N/A	#N/A	#N/A	#N/A
AFUA_4G03410	flavohemoprotein	*	18351.4	119.42	153.67		Flavohemoprotein (EC 1.5.1.34)	GO:0055114	oxidation-reduction process	BP	IEA	7.8355e-8	6.6367e-05	AFUA_4G03410	Flavohemoprotein (EC 1.5.1.34)	1.02	nitrogen, sulfur and selenium metabolism	Metabolism	0.011195	0.25186
AFUA_6G00740	conserved hypothetical protein	*	594.34	4.43	134.15		Putative uncharacterized protein	GO:0055114	oxidation-reduction process	BP	IEA	7.8355e-8	6.6367e-05	AFUA_6G00740	#N/A	#N/A	#N/A	#N/A	#N/A	#N/A
AFUA_2G00440	conserved hypothetical protein	*	996.97	7.58	131.57		Uncharacterized protein	GO:0005575	cellular_component	CC	ND	3.3105e-7	9.3467e-05	AFUA_2G00440	#N/A	#N/A	#N/A	#N/A	#N/A	#N/A
AFUA_4G01140	MFS multidrug transporter, putative	*	3608.05	35.51	101.62		#N/A	#N/A	#N/A	#N/A	#N/A	#N/A	#N/A	AFUA_4G01140	MFS multidrug transporter, putative	32.07	detoxification	Cell rescue, defense and virulence	8.7992e-06	0.0014049
AFUA_6G03420	0		309.27	3.3	93.74		#N/A	#N/A	#N/A	#N/A	#N/A	#N/A	#N/A	AFUA_6G03420	#N/A	#N/A	#N/A	#N/A	#N/A	#N/A
AFUA_6G08730	6-phosphogluconate dehydrogenase, decarboxylating		192.97	2.12	91.16		6-phosphogluconate dehydrogenase, decarboxylating (EC 1.1.1.44)	GO:0055114	oxidation-reduction process	BP	IEA	7.8355e-8	6.6367e-05	AFUA_6G08730	6-phosphogluconate dehydrogenase, decarboxylating (EC 1.1.1.44)	1.05	C-compound and carbohydrate metabolism	Metabolism	2.515e-06	0.0010864
AFUA_4G03595	conserved hypothetical protein		1991.15	22.12	90.01		Uncharacterized protein	GO:0005575	cellular_component	CC	ND	3.3105e-7	9.3467e-05	AFUA_4G03595	#N/A	#N/A	#N/A	#N/A	#N/A	#N/A
AFUA_3G03280	FAD binding monooxygenase, putative	*	547.5	6.39	85.71		FAD binding monooxygenase, putative (EC 1.14.13.-)	GO:0055114	oxidation-reduction process	BP	IEA	7.8355e-8	6.6367e-05	AFUA_3G03280	FAD binding monooxygenase, putative (EC 1.14.13.-)	1.2	secondary metabolism	Metabolism	0.0024405	0.078984
AFUA_6G03400	conserved hypothetical protein		1851.12	22.42	82.56		Uncharacterized protein	GO:0005575	cellular_component	CC	ND	3.3105e-7	9.3467e-05	AFUA_6G03400	#N/A	#N/A	#N/A	#N/A	#N/A	#N/A
AFUA_1G03610	conserved hypothetical protein	*	6026.3	73.76	81.7		Uncharacterized protein	GO:0005575	cellular_component	CC	ND	3.3105e-7	9.3467e-05	AFUA_1G03610	#N/A	#N/A	#N/A	#N/A	#N/A	#N/A
AFUA_1G12840	nitrite reductase NiiA	*	81.38	1	81.7		Nitrite reductase NiiA (EC 1.7.1.4)	GO:0055114	oxidation-reduction process	BP	IEA	7.8355e-8	6.6367e-05	AFUA_1G12840	Nitrite reductase NiiA (EC 1.7.1.4)	32.07	detoxification	Cell rescue, defense and virulence	8.7992e-06	0.0014049
AFUA_6G12220	isochorismatase family hydrolase, putative		3110.72	39.44	78.87		Isochorismatase family hydrolase, putative	GO:0005575	cellular_component	CC	ND	3.3105e-7	9.3467e-05	AFUA_6G12220	#N/A	#N/A	#N/A	#N/A	#N/A	#N/A
AFUA_6G04470	conserved hypothetical protein		523.42	6.71	77.97		Uncharacterized protein	GO:0005575	cellular_component	CC	ND	3.3105e-7	9.3467e-05	AFUA_6G04470	#N/A	#N/A	#N/A	#N/A	#N/A	#N/A
AFUA_5G09970	67 kDa myosin-cross-reactive antigen family protein	*	681.78	9.05	75.33		67 kDa myosin-cross-reactive antigen family protein	GO:0005575	cellular_component	CC	ND	3.3105e-7	9.3467e-05	AFUA_5G09970	#N/A	#N/A	#N/A	#N/A	#N/A	#N/A
AFUA_5G13750	calcium binding protein Caleosin, putative	*	220.65	3.29	67.08		Calcium binding protein Caleosin, putative	GO:0005575	cellular_component	CC	ND	3.3105e-7	9.3467e-05	AFUA_5G13750	#N/A	#N/A	#N/A	#N/A	#N/A	#N/A
AFUA_5G03400	SH3 domain protein (Cyk3), putative		111.7	1.78	62.78		#N/A	#N/A	#N/A	#N/A	#N/A	#N/A	#N/A	AFUA_5G03400	#N/A	#N/A	#N/A	#N/A	#N/A	#N/A
AFUA_5G01160	MFS monosaccharide transporter, putative		118.11	1.96	60.2		#N/A	#N/A	#N/A	#N/A	#N/A	#N/A	#N/A	AFUA_5G01160	MFS monosaccharide transporter, putative	1.05	C-compound and carbohydrate metabolism	Metabolism	2.515e-06	0.0010864
AFUA_2G05070	conserved hypothetical protein	*	124.86	2.17	57.62		Uncharacterized protein	GO:0005575	cellular_component	CC	ND	3.3105e-7	9.3467e-05	AFUA_2G05070	#N/A	#N/A	#N/A	#N/A	#N/A	#N/A
AFUA_5G12830	DUF1264 domain protein		311.84	5.41	57.62		DUF1264 domain protein	GO:0005575	cellular_component	CC	ND	3.3105e-7	9.3467e-05	AFUA_5G12830	#N/A	#N/A	#N/A	#N/A	#N/A	#N/A
AFUA_6G14200	acetyl-CoA-acetyltransferase, putative		420.17	7.59	55.32		Acetyl-CoA-acetyltransferase, putative (EC 2.3.1.9)	GO:0008152	metabolic process	BP	IEA	0.0026803	0.41559	AFUA_6G14200	Acetyl-CoA-acetyltransferase, putative (EC 2.3.1.9)	1.06	lipid, fatty acid and isoprenoid metabolism	Metabolism	4.5362e-06	0.0010864
AFUA_3G14590	copper amine oxidase, putative	*	170.13	3.27	52.03		Amine oxidase	GO:0055114	oxidation-reduction process	BP	IEA	7.8355e-8	6.6367e-05	AFUA_3G14590	Amine oxidase	1.05	C-compound and carbohydrate metabolism	Metabolism	2.515e-06	0.0010864
AFUA_8G01690	conserved hypothetical protein		7762.84	149.424	51.9517		Uncharacterized protein	GO:0005575	cellular_component	CC	ND	3.3105e-7	9.3467e-05	AFUA_8G01690	#N/A	#N/A	#N/A	#N/A	#N/A	#N/A
AFUA_6G00750	pyruvate decarboxylase, putative		95.1405	1.90748	49.8777		Pyruvate decarboxylase, putative (EC 4.1.1.1)	GO:0005575	cellular_component	CC	ND	3.3105e-7	9.3467e-05	AFUA_6G00750	Pyruvate decarboxylase, putative (EC 4.1.1.1)	1.05	C-compound and carbohydrate metabolism	Metabolism	2.515e-06	0.0010864
AFUA_6G08320	conserved hypothetical protein		682.053	13.9963	48.7311		#N/A	#N/A	#N/A	#N/A	#N/A	#N/A	#N/A	AFUA_6G08320	#N/A	#N/A	#N/A	#N/A	#N/A	#N/A
AFUA_1G03600	exo-beta-1,3-glucanase (Exg1), putative		126.885	2.63479	48.1578		Probable glucan 1,3-beta-glucosidase A (EC 3.2.1.58) (Exo-1,3-beta-glucanase 1) (Exo-1,3-beta-glucanase A)	GO:0005575	cellular_component	CC	ND	3.3105e-7	9.3467e-05	AFUA_1G03600	Probable glucan 1,3-beta-glucosidase A (EC 3.2.1.58) (Exo-1,3-beta-glucanase 1) (Exo-1,3-beta-glucanase A)	1.05	C-compound and carbohydrate metabolism	Metabolism	2.515e-06	0.0010864
AFUA_4G03400	hypothetical protein		231.955	4.94913	46.8678		Uncharacterized protein	GO:0005575	cellular_component	CC	ND	3.3105e-7	9.3467e-05	AFUA_4G03400	#N/A	#N/A	#N/A	#N/A	#N/A	#N/A
AFUA_7G05010	glyoxalase family protein		265.737	5.72243	46.4378		Glyoxalase family protein	GO:0005575	cellular_component	CC	ND	3.3105e-7	9.3467e-05	AFUA_7G05010	#N/A	#N/A	#N/A	#N/A	#N/A	#N/A
AFUA_7G02420	malate dehydrogenase, putative		85.1506	1.90417	44.7179		Malic enzyme	GO:0055114	oxidation-reduction process	BP	IEA	7.8355e-8	6.6367e-05	AFUA_7G02420	Malic enzyme	1.05	C-compound and carbohydrate metabolism	Metabolism	2.515e-06	0.0010864
AFUA_5G10050	cytochrome P450 monooxygenase, putative		87.1375	1.98681	43.858		Cytochrome P450 monooxygenase, putative (EC 1.14.-.-)	GO:0055114	oxidation-reduction process	BP	IEA	7.8355e-8	6.6367e-05	AFUA_5G10050	Cytochrome P450 monooxygenase, putative (EC 1.14.-.-)	1.06	lipid, fatty acid and isoprenoid metabolism	Metabolism	4.5362e-06	0.0010864
AFUA_3G14600	fungal specific transcription factor, putative		71.9059	1.67231	42.998		#N/A	#N/A	#N/A	#N/A	#N/A	#N/A	#N/A	AFUA_3G14600	#N/A	#N/A	#N/A	#N/A	#N/A	#N/A
AFUA_6G13390	FAD dependent oxidoreductase, putative		91.5546	2.12928	42.998		FAD dependent oxidoreductase, putative	GO:0055114	oxidation-reduction process	BP	IEA	7.8355e-8	6.6367e-05	AFUA_6G13390	#N/A	#N/A	#N/A	#N/A	#N/A	#N/A
AFUA_2G05060	alternative oxidase AlxA, putative		7842.47	189.861	41.3063		Alternative oxidase (EC 1.-.-.-)	GO:0055114	oxidation-reduction process	BP	IEA	7.8355e-8	6.6367e-05	AFUA_2G05060	#N/A	#N/A	#N/A	#N/A	#N/A	#N/A
AFUA_8G02440	C-4 methyl sterol oxidase, putative		3464.43	87.0263	39.809		C-4 methyl sterol oxidase, putative (EC 1.-.-.-)	GO:0055114	oxidation-reduction process	BP	IEA	7.8355e-8	6.6367e-05	AFUA_8G02440	C-4 methyl sterol oxidase, putative (EC 1.-.-.-)	1.06	lipid, fatty acid and isoprenoid metabolism	Metabolism	4.5362e-06	0.0010864
AFUA_1G13750	C2H2 transcription factor (Rpn4), putative		944.844	24.0812	39.2357		#N/A	#N/A	#N/A	#N/A	#N/A	#N/A	#N/A	AFUA_1G13750	#N/A	#N/A	#N/A	#N/A	#N/A	#N/A
AFUA_1G06020	DnaJ domain protein		145.978	3.73075	39.1282		DnaJ domain protein	GO:0005575	cellular_component	CC	ND	3.3105e-7	9.3467e-05	AFUA_1G06020	#N/A	#N/A	#N/A	#N/A	#N/A	#N/A
AFUA_3G12740	copper resistance-associated P-type ATPase, putative		927.528	25.3884	36.5335		Copper resistance-associated P-type ATPase, putative (EC 3.6.3.4)	GO:0008152	metabolic process	BP	IEA	0.0026803	0.41559	AFUA_3G12740	Copper resistance-associated P-type ATPase, putative (EC 3.6.3.4)	20.09.16	cellular export and secretion	Cellular transport, transport facilitation and transport routes	0.00089546	0.066362
AFUA_6G09740	thioredoxin reductase GliT		118.458	3.27972	36.1183		Thioredoxin reductase GliT (EC 1.-.-.-)	GO:0055114	oxidation-reduction process	BP	IEA	7.8355e-8	6.6367e-05	AFUA_6G09740	Thioredoxin reductase GliT (EC 1.-.-.-)	1.2	secondary metabolism	Metabolism	0.0024405	0.078984
AFUA_1G12830	nitrate reductase NiaD		228.066	6.31441	36.1183		Nitrate reductase	GO:0055114	oxidation-reduction process	BP	IEA	7.8355e-8	6.6367e-05	AFUA_1G12830	Nitrate reductase	01.06.05	fatty acid metabolism	Metabolism	0.00056875	0.06568
AFUA_6G13490	glutamate decarboxylase		767.228	21.2928	36.0323		#N/A	#N/A	#N/A	#N/A	#N/A	#N/A	#N/A	AFUA_6G13490	#N/A	#N/A	#N/A	#N/A	#N/A	#N/A
AFUA_7G01780	hypothetical protein		2259.41	63.6931	35.4733		Uncharacterized protein	GO:0005575	cellular_component	CC	ND	3.3105e-7	9.3467e-05	AFUA_7G01780	#N/A	#N/A	#N/A	#N/A	#N/A	#N/A
AFUA_6G02010	conserved hypothetical protein		613.143	17.5326	34.9717		Uncharacterized protein	GO:0055114	oxidation-reduction process	BP	IEA	7.8355e-8	6.6367e-05	AFUA_6G02010	#N/A	#N/A	#N/A	#N/A	#N/A	#N/A
AFUA_8G02450	conserved hypothetical protein		343.975	10.1263	33.9684		Uncharacterized protein	GO:0005575	cellular_component	CC	ND	3.3105e-7	9.3467e-05	AFUA_8G02450	#N/A	#N/A	#N/A	#N/A	#N/A	#N/A
AFUA_3G02780	MFS multidrug transporter, putative		212.999	6.35091	33.5384		#N/A	#N/A	#N/A	#N/A	#N/A	#N/A	#N/A	AFUA_3G02780	MFS multidrug transporter, putative	32.07	detoxification	Cell rescue, defense and virulence	8.7992e-06	0.0014049
AFUA_3G14560	MFS multidrug transporter, putative		130.56	3.9953	32.6785		#N/A	#N/A	#N/A	#N/A	#N/A	#N/A	#N/A	AFUA_3G14560	MFS multidrug transporter, putative	20.09.16	cellular export and secretion	Cellular transport, transport facilitation and transport routes	0.00089546	0.066362
AFUA_5G10040	C6 transcription factor, putative		51.11	1.6063	31.8185		#N/A	#N/A	#N/A	#N/A	#N/A	#N/A	#N/A	AFUA_5G10040	C6 transcription factor, putative	1.2	secondary metabolism	Metabolism	0.0024405	0.078984
AFUA_2G09530	DUF833 domain protein		113.504	3.56723	31.8185		#N/A	#N/A	#N/A	#N/A	#N/A	#N/A	#N/A	AFUA_2G09530	#N/A	#N/A	#N/A	#N/A	#N/A	#N/A
AFUA_3G00730	conserved hypothetical protein		967.611	30.8873	31.3271		#N/A	#N/A	#N/A	#N/A	#N/A	#N/A	#N/A	AFUA_3G00730	#N/A	#N/A	#N/A	#N/A	#N/A	#N/A
AFUA_1G13990	conserved hypothetical protein		118.931	3.84163	30.9586		Uncharacterized protein	GO:0005575	cellular_component	CC	ND	3.3105e-7	9.3467e-05	AFUA_1G13990	#N/A	#N/A	#N/A	#N/A	#N/A	#N/A
AFUA_6G13330	RNA binding protein, putative		2650.58	87.5076	30.2897		#N/A	#N/A	#N/A	#N/A	#N/A	#N/A	#N/A	AFUA_6G13330	#N/A	#N/A	#N/A	#N/A	#N/A	#N/A
AFUA_1G17040	D-lactate dehydrogenase, putative		371.964	12.6288	29.4536		D-lactate dehydrogenase, putative (EC 1.1.1.28)	GO:0055114	oxidation-reduction process	BP	IEA	7.8355e-8	6.6367e-05	AFUA_1G17040	D-lactate dehydrogenase, putative (EC 1.1.1.28)	1.05	C-compound and carbohydrate metabolism	Metabolism	2.515e-06	0.0010864
AFUA_5G14210	glucose repressible protein Grg1, putative		13821.7	470.874	29.3533		Glucose repressible protein Grg1, putative	GO:0005575	cellular_component	CC	ND	3.3105e-7	9.3467e-05	AFUA_5G14210	#N/A	#N/A	#N/A	#N/A	#N/A	#N/A
AFUA_1G02970	salicylate hydroxylase, putative		72.8501	2.56707	28.3787		Salicylate hydroxylase, putative (EC 1.14.13.1)	GO:0055114	oxidation-reduction process	BP	IEA	7.8355e-8	6.6367e-05	AFUA_1G02970	Salicylate hydroxylase, putative (EC 1.14.13.1)	1.06	lipid, fatty acid and isoprenoid metabolism	Metabolism	4.5362e-06	0.0010864
AFUA_1G07480	coproporphyrinogen III oxidase, putative		3153.76	112.113	28.1302		Coproporphyrinogen III oxidase, putative (EC 1.3.3.3)	GO:0055114	oxidation-reduction process	BP	IEA	7.8355e-8	6.6367e-05	AFUA_1G07480	#N/A	#N/A	#N/A	#N/A	#N/A	#N/A
AFUA_8G07220	hypothetical protein		133.801	4.78739	27.9487		Uncharacterized protein	GO:0005575	cellular_component	CC	ND	3.3105e-7	9.3467e-05	AFUA_8G07220	#N/A	#N/A	#N/A	#N/A	#N/A	#N/A
AFUA_2G16630	acyl-CoA dehydrogenase		69.0297	2.50846	27.5187		Acyl-CoA dehydrogenase (EC 1.3.99.-)	GO:0055114	oxidation-reduction process	BP	IEA	7.8355e-8	6.6367e-05	AFUA_2G16630	Acyl-CoA dehydrogenase (EC 1.3.99.-)	1.06	lipid, fatty acid and isoprenoid metabolism	Metabolism	4.5362e-06	0.0010864
AFUA_3G12630	cytochrome b561, putative		126.506	4.5971	27.5187		#N/A	#N/A	#N/A	#N/A	#N/A	#N/A	#N/A	AFUA_3G12630	#N/A	#N/A	#N/A	#N/A	#N/A	#N/A
AFUA_3G12100	trehalose synthase (Ccg-9), putative		591.377	22.1322	26.7202		Trehalose synthase (Ccg-9), putative (EC 2.4.1.-)	GO:0005575	cellular_component	CC	ND	3.3105e-7	9.3467e-05	AFUA_3G12100	Trehalose synthase (Ccg-9), putative (EC 2.4.1.-)	1.05	C-compound and carbohydrate metabolism	Metabolism	2.515e-06	0.0010864
AFUA_3G11550	LEA domain protein		1454.12	54.5457	26.6588		LEA domain protein	GO:0005575	cellular_component	CC	ND	3.3105e-7	9.3467e-05	AFUA_3G11550	#N/A	#N/A	#N/A	#N/A	#N/A	#N/A
AFUA_5G09180	conserved hypothetical protein		186.523	7.11137	26.2288		#N/A	#N/A	#N/A	#N/A	#N/A	#N/A	#N/A	AFUA_5G09180	#N/A	#N/A	#N/A	#N/A	#N/A	#N/A
AFUA_1G02820	NADH-quinone oxidoreductase Pst2, putative		138.948	5.38582	25.7988		NADH-quinone oxidoreductase Pst2, putative	GO:0055114	oxidation-reduction process	BP	IEA	7.8355e-8	6.6367e-05	AFUA_1G02820	NADH-quinone oxidoreductase Pst2, putative	20.01.27	drug/toxin transport	Cellular transport, transport facilitation and transport routes	0.0012687	0.067524
AFUA_2G01590	non-classical export protein Nce102, putative		316.737	12.4853	25.3688		#N/A	#N/A	#N/A	#N/A	#N/A	#N/A	#N/A	AFUA_2G01590	Non-classical export protein Nce102, putative	20.09.16	cellular export and secretion	Cellular transport, transport facilitation and transport routes	0.00089546	0.066362
AFUA_3G05740	aldose 1-epimerase, putative		336.008	13.3581	25.1538		Aldose 1-epimerase, putative (EC 5.1.3.3)	GO:0005575	cellular_component	CC	ND	3.3105e-7	9.3467e-05	AFUA_3G05740	Aldose 1-epimerase, putative (EC 5.1.3.3)	1.05	C-compound and carbohydrate metabolism	Metabolism	2.515e-06	0.0010864
AFUA_2G12080	mitochondrial phosphate transporter Pic2, putative		365.34	14.6494	24.9388		#N/A	#N/A	#N/A	#N/A	#N/A	#N/A	#N/A	AFUA_2G12080	Mitochondrial phosphate transporter Pic2, putative	20.01.01.07	anion transport	Cellular transport, transport facilitation and transport routes	0.047097	0.48136
AFUA_3G09240	CAIB/BAIF family enzyme		606.991	24.4157	24.8607		CAIB/BAIF family enzyme	GO:0005575	cellular_component	CC	ND	3.3105e-7	9.3467e-05	AFUA_3G09240	#N/A	#N/A	#N/A	#N/A	#N/A	#N/A
AFUA_3G09250	cell wall glucanase, putative		223.232	9.05528	24.6522		Cell wall glucanase, putative (EC 3.2.1.-)	GO:0005575	cellular_component	CC	ND	3.3105e-7	9.3467e-05	AFUA_3G09250	#N/A	#N/A	#N/A	#N/A	#N/A	#N/A
AFUA_6G09160	ubiquitin conjugating enzyme Ubc8, putative		1629.04	70.3605	23.1528		Ubiquitin conjugating enzyme Ubc8, putative (EC 6.3.2.19)	GO:0005575	cellular_component	CC	ND	3.3105e-7	9.3467e-05	AFUA_6G09160	Ubiquitin conjugating enzyme Ubc8, putative (EC 6.3.2.19)	43.01.03.09	development of asco- basidio- or zygospore	Cell type differentiation	0.035951	0.41473
AFUA_4G14530	glutathione S-transferase Ure2-like, putative		108.699	4.86153	22.359		Glutathione S-transferase Ure2-like, putative	GO:0055114	oxidation-reduction process	BP	IDA	7.8355e-8	6.6367e-05	AFUA_4G14530	Glutathione S-transferase Ure2-like, putative	1.2	secondary metabolism	Metabolism	0.0024405	0.078984
AFUA_2G17770	conserved hypothetical protein		61.5688	2.75365	22.359		Uncharacterized protein	GO:0005575	cellular_component	CC	ND	3.3105e-7	9.3467e-05	AFUA_2G17770	#N/A	#N/A	#N/A	#N/A	#N/A	#N/A
AFUA_5G10940	conserved hypothetical protein		112.552	5.16633	21.7857		Uncharacterized protein	GO:0005575	cellular_component	CC	ND	3.3105e-7	9.3467e-05	AFUA_5G10940	#N/A	#N/A	#N/A	#N/A	#N/A	#N/A
AFUA_3G00370	phosphoketolase, putative		381.192	17.5685	21.6975		Phosphoketolase, putative (EC 4.1.2.-)	GO:0005575	cellular_component	CC	ND	3.3105e-7	9.3467e-05	AFUA_3G00370	Phosphoketolase, putative (EC 4.1.2.-)	1.05	C-compound and carbohydrate metabolism	Metabolism	2.515e-06	0.0010864
AFUA_3G12190	RING finger domain protein, putative		451.359	20.9944	21.499		RING finger domain protein, putative	GO:0005575	cellular_component	CC	ND	3.3105e-7	9.3467e-05	AFUA_3G12190	#N/A	#N/A	#N/A	#N/A	#N/A	#N/A
AFUA_3G10910	glutaminase, putative		28.2887	1.31582	21.499		Glutaminase, putative	GO:0005575	cellular_component	CC	ND	3.3105e-7	9.3467e-05	AFUA_3G10910	#N/A	#N/A	#N/A	#N/A	#N/A	#N/A
AFUA_2G16430	conserved hypothetical protein		916.64	43.7296	20.9615		Uncharacterized protein	GO:0005575	cellular_component	CC	ND	3.3105e-7	9.3467e-05	AFUA_2G16430	#N/A	#N/A	#N/A	#N/A	#N/A	#N/A
AFUA_5G14230	C6 transcription factor, putative		127.874	6.19571	20.639		#N/A	#N/A	#N/A	#N/A	#N/A	#N/A	#N/A	AFUA_5G14230	C6 transcription factor, putative	1.2	secondary metabolism	Metabolism	0.0024405	0.078984
AFUA_8G05880	chaperonin (GroES/Cpn10), putative		195.485	9.47161	20.639		#N/A	#N/A	#N/A	#N/A	#N/A	#N/A	#N/A	AFUA_8G05880	#N/A	#N/A	#N/A	#N/A	#N/A	#N/A
AFUA_2G15420	conserved hypothetical protein		167.972	8.13857	20.639		#N/A	#N/A	#N/A	#N/A	#N/A	#N/A	#N/A	AFUA_2G15420	Uncharacterized protein	01.05.03	polysaccharide metabolism	Metabolism	0.012778	0.25186
AFUA_3G14540	heat shock protein Hsp30/Hsp42, putative		7250.76	364.212	19.9081		#N/A	#N/A	#N/A	#N/A	#N/A	#N/A	#N/A	AFUA_3G14540	Heat shock protein Hsp30/Hsp42, putative	32.01.01	oxidative stress response	Cell rescue, defense and virulence	0.030979	0.41473
AFUA_1G04860	rhodopsin family protein		159.79	8.07873	19.7791		Rhodopsin family protein	GO:0005575	cellular_component	CC	ND	3.3105e-7	9.3467e-05	AFUA_1G04860	#N/A	#N/A	#N/A	#N/A	#N/A	#N/A
AFUA_5G09930	conserved hypothetical protein		80.4867	4.06928	19.7791		Uncharacterized protein	GO:0005575	cellular_component	CC	ND	3.3105e-7	9.3467e-05	AFUA_5G09930	#N/A	#N/A	#N/A	#N/A	#N/A	#N/A
AFUA_7G02220	conserved hypothetical protein		1094.93	55.5303	19.7177		Uncharacterized protein	GO:0005575	cellular_component	CC	ND	3.3105e-7	9.3467e-05	AFUA_7G02220	#N/A	#N/A	#N/A	#N/A	#N/A	#N/A
AFUA_4G12710	conserved hypothetical protein		104.211	5.38582	19.3491		Uncharacterized protein	GO:0055114	oxidation-reduction process	BP	IEA	7.8355e-8	6.6367e-05	AFUA_4G12710	#N/A	#N/A	#N/A	#N/A	#N/A	#N/A
AFUA_3G00240	TPR domain protein		73.0549	3.77562	19.3491		#N/A	#N/A	#N/A	#N/A	#N/A	#N/A	#N/A	AFUA_3G00240	#N/A	#N/A	#N/A	#N/A	#N/A	#N/A
AFUA_2G11250	aryl-alcohol dehydrogenase Aad14, putative		552.181	28.5378	19.3491		Aryl-alcohol dehydrogenase Aad14, putative (EC 1.1.1.-)	GO:0055114	oxidation-reduction process	BP	IEA	7.8355e-8	6.6367e-05	AFUA_2G11250	Aryl-alcohol dehydrogenase Aad14, putative (EC 1.1.1.-)	1.05	C-compound and carbohydrate metabolism	Metabolism	2.515e-06	0.0010864
AFUA_1G13400	conserved hypothetical protein		1151.93	60.2031	19.1341		Uncharacterized protein	GO:0005575	cellular_component	CC	ND	3.3105e-7	9.3467e-05	AFUA_1G13400	#N/A	#N/A	#N/A	#N/A	#N/A	#N/A
AFUA_5G07010	HPP family protein		281.852	14.8977	18.9191		HPP family protein	GO:0005575	cellular_component	CC	ND	3.3105e-7	9.3467e-05	AFUA_5G07010	#N/A	#N/A	#N/A	#N/A	#N/A	#N/A
AFUA_8G04920	LEA domain protein		50.412	2.66461	18.9191		LEA domain protein	GO:0005575	cellular_component	CC	ND	3.3105e-7	9.3467e-05	AFUA_8G04920	#N/A	#N/A	#N/A	#N/A	#N/A	#N/A
AFUA_7G01430	opsin, putative		328.372	18.0116	18.2312		#N/A	#N/A	#N/A	#N/A	#N/A	#N/A	#N/A	AFUA_7G01430	Opsin, putative	1.2	secondary metabolism	Metabolism	0.0024405	0.078984
AFUA_3G00840	FAD-dependent oxygenase, putative		78.117	4.32562	18.0592		FAD-dependent oxygenase, putative	GO:0055114	oxidation-reduction process	BP	IEA	7.8355e-8	6.6367e-05	AFUA_3G00840	FAD-dependent oxygenase, putative	1.05	C-compound and carbohydrate metabolism	Metabolism	2.515e-06	0.0010864
AFUA_4G09930	conserved hypothetical protein		862.683	47.7699	18.0592		Uncharacterized protein	GO:0005575	cellular_component	CC	ND	3.3105e-7	9.3467e-05	AFUA_4G09930	#N/A	#N/A	#N/A	#N/A	#N/A	#N/A
AFUA_5G12940	arylsulfatase, putative		30.7147	1.70078	18.0592		Arylsulfatase, putative (EC 3.1.6.1)	GO:0008152	metabolic process	BP	IEA	0.0026803	0.41559	AFUA_5G12940	Arylsulfatase, putative (EC 3.1.6.1)	1.05	C-compound and carbohydrate metabolism	Metabolism	2.515e-06	0.0010864
AFUA_8G06030	alpha-1,3-glucanase, putative		41.772	2.31307	18.0592		Alpha-1,3-glucanase, putative (EC 3.2.1.-)	GO:0005575	cellular_component	CC	ND	3.3105e-7	9.3467e-05	AFUA_8G06030	Alpha-1,3-glucanase, putative (EC 3.2.1.-)	01.05.03	polysaccharide metabolism	Metabolism	0.012778	0.25186
AFUA_1G15270	heat shock protein Hsp98/Hsp104/ClpA, putative		2312.88	129.907	17.8041		#N/A	#N/A	#N/A	#N/A	#N/A	#N/A	#N/A	AFUA_1G15270	#N/A	#N/A	#N/A	#N/A	#N/A	#N/A
AFUA_6G01950	conserved hypothetical protein		130.041	7.40226	17.5678		Uncharacterized protein	GO:0005575	cellular_component	CC	ND	3.3105e-7	9.3467e-05	AFUA_6G01950	#N/A	#N/A	#N/A	#N/A	#N/A	#N/A
AFUA_6G03890	spore-specific catalase CatA		125.811	7.31496	17.1992		Catalase A (EC 1.11.1.6) (Fast catalase)	GO:0055114	oxidation-reduction process	BP	IEA	7.8355e-8	6.6367e-05	AFUA_6G03890	Catalase A (EC 1.11.1.6) (Fast catalase)	16.21.01	heme binding	Protein with binding function or cofactor requirement (structural or analytic)	0.013841	0.25499
AFUA_5G08220	conserved hypothetical protein		166.388	9.67415	17.1992		Uncharacterized protein	GO:0005575	cellular_component	CC	ND	3.3105e-7	9.3467e-05	AFUA_5G08220	Uncharacterized protein	1.2	secondary metabolism	Metabolism	0.0024405	0.078984
AFUA_1G05980	AMP-binding domain protein, putative		32.8071	1.90748	17.1992		AMP-binding domain protein, putative	GO:0005575	cellular_component	CC	ND	3.3105e-7	9.3467e-05	AFUA_1G05980	AMP-binding domain protein, putative	1.06	lipid, fatty acid and isoprenoid metabolism	Metabolism	4.5362e-06	0.0010864
AFUA_7G00390	MFS multidrug transporter, putative		41.715	2.4254	17.1992		#N/A	#N/A	#N/A	#N/A	#N/A	#N/A	#N/A	AFUA_7G00390	MFS multidrug transporter, putative	20.09.16	cellular export and secretion	Cellular transport, transport facilitation and transport routes	0.00089546	0.066362
AFUA_2G13870	mitochondrial carrier protein, putative		154.54	9.09902	16.9842		Mitochondrial carrier protein, putative	GO:0005575	cellular_component	CC	ND	3.3105e-7	9.3467e-05	AFUA_2G13870	Mitochondrial carrier protein, putative	1.06	lipid, fatty acid and isoprenoid metabolism	Metabolism	4.5362e-06	0.0010864
AFUA_2G09220	conserved hypothetical protein		153.261	9.18651	16.6832		Uncharacterized protein	GO:0005575	cellular_component	CC	ND	3.3105e-7	9.3467e-05	AFUA_2G09220	#N/A	#N/A	#N/A	#N/A	#N/A	#N/A
AFUA_7G04470	hypothetical protein		26.6746	1.63255	16.3392		Uncharacterized protein	GO:0005575	cellular_component	CC	ND	3.3105e-7	9.3467e-05	AFUA_7G04470	#N/A	#N/A	#N/A	#N/A	#N/A	#N/A
AFUA_4G06410	conserved hypothetical protein		401.381	24.7829	16.1959		Uncharacterized protein	GO:0005575	cellular_component	CC	ND	3.3105e-7	9.3467e-05	AFUA_4G06410	#N/A	#N/A	#N/A	#N/A	#N/A	#N/A
AFUA_3G09830	conserved hypothetical protein		392.8	24.69	15.9093		Uncharacterized protein	GO:0005575	cellular_component	CC	ND	3.3105e-7	9.3467e-05	AFUA_3G09830	#N/A	#N/A	#N/A	#N/A	#N/A	#N/A
AFUA_2G15430	sorbitol/xylulose reductase Sou1-like, putative		1281.02	82.3001	15.5653		Sorbitol/xylulose reductase Sou1-like, putative (EC 1.-.-.-)	GO:0055114	oxidation-reduction process	BP	IEA	7.8355e-8	6.6367e-05	AFUA_2G15430	Sorbitol/xylulose reductase Sou1-like, putative (EC 1.-.-.-)	1.05	C-compound and carbohydrate metabolism	Metabolism	2.515e-06	0.0010864
AFUA_5G09920	peptidase, putative		49.2962	3.18466	15.4793		Peptidase, putative (EC 3.-.-.-)	GO:0005575	cellular_component	CC	ND	3.3105e-7	9.3467e-05	AFUA_5G09920	#N/A	#N/A	#N/A	#N/A	#N/A	#N/A
AFUA_1G13050	C2H2 transcription factor, putative		490.182	33.0438	14.8343		#N/A	#N/A	#N/A	#N/A	#N/A	#N/A	#N/A	AFUA_1G13050	#N/A	#N/A	#N/A	#N/A	#N/A	#N/A
AFUA_4G03830	conserved hypothetical protein		560.39	37.8864	14.7913		#N/A	#N/A	#N/A	#N/A	#N/A	#N/A	#N/A	AFUA_4G03830	#N/A	#N/A	#N/A	#N/A	#N/A	#N/A
AFUA_4G03470	tannase, putative		137.957	9.32688	14.7913		Tannase, putative (EC 3.1.1.20)	GO:0005575	cellular_component	CC	ND	3.3105e-7	9.3467e-05	AFUA_4G03470	Tannase, putative (EC 3.1.1.20)	01.05.03	polysaccharide metabolism	Metabolism	0.012778	0.25186
AFUA_4G00660	sensor histidine kinase/response regulator, putative		172.422	11.6884	14.7516		#N/A	#N/A	#N/A	#N/A	#N/A	#N/A	#N/A	AFUA_4G00660	#N/A	#N/A	#N/A	#N/A	#N/A	#N/A
AFUA_3G05770	RAS small monomeric GTPase, putative		119.423	8.16882	14.6193		#N/A	#N/A	#N/A	#N/A	#N/A	#N/A	#N/A	AFUA_3G05770	RAS small monomeric GTPase, putative	43.01.03.09	development of asco- basidio- or zygospore	Cell type differentiation	0.035951	0.41473
AFUA_8G01750	#N/A		50.9108	3.48243	14.6193		Acyl-CoA oxidase, putative	GO:0055114	oxidation-reduction process	BP	IEA	7.8355e-8	6.6367e-05	AFUA_8G01750	Acyl-CoA oxidase, putative	1.06	lipid, fatty acid and isoprenoid metabolism	Metabolism	4.5362e-06	0.0010864
AFUA_5G00650	conserved hypothetical protein		47.1036	3.22201	14.6193		Uncharacterized protein	GO:0005575	cellular_component	CC	ND	3.3105e-7	9.3467e-05	AFUA_5G00650	#N/A	#N/A	#N/A	#N/A	#N/A	#N/A
AFUA_3G00540	MFS peptide transporter, putative		28.4793	1.94806	14.6193		#N/A	#N/A	#N/A	#N/A	#N/A	#N/A	#N/A	AFUA_3G00540	#N/A	#N/A	#N/A	#N/A	#N/A	#N/A
AFUA_3G12180	C6 transcription factor, putative		69.534	4.75631	14.6193		#N/A	#N/A	#N/A	#N/A	#N/A	#N/A	#N/A	AFUA_3G12180	#N/A	#N/A	#N/A	#N/A	#N/A	#N/A
AFUA_2G00790	conserved hypothetical protein		725.113	51.1026	14.1893		Uncharacterized protein	GO:0005575	cellular_component	CC	ND	3.3105e-7	9.3467e-05	AFUA_2G00790	#N/A	#N/A	#N/A	#N/A	#N/A	#N/A
AFUA_2G08170	RNA polymerase II transcription factor SIII (Elongin) subunit A, putative		78.5387	5.53505	14.1893		#N/A	#N/A	#N/A	#N/A	#N/A	#N/A	#N/A	AFUA_2G08170	#N/A	#N/A	#N/A	#N/A	#N/A	#N/A
AFUA_2G04080	GPR/FUN34 family protein		916.686	65.4858	13.9982		#N/A	#N/A	#N/A	#N/A	#N/A	#N/A	#N/A	AFUA_2G04080	GPR/FUN34 family protein	20.09.16	cellular export and secretion	Cellular transport, transport facilitation and transport routes	0.00089546	0.066362
AFUA_2G01410	aldo-keto reductase, putative		135.381	9.83916	13.7594		Aldo-keto reductase, putative (EC 1.1.1.-)	GO:0055114	oxidation-reduction process	BP	IEA	7.8355e-8	6.6367e-05	AFUA_2G01410	Aldo-keto reductase, putative (EC 1.1.1.-)	1.05	C-compound and carbohydrate metabolism	Metabolism	2.515e-06	0.0010864
AFUA_4G14090	UDP-glucose 4-epimerase		36.3401	2.64112	13.7594		UDP-glucose 4-epimerase (EC 5.1.3.2)	GO:0005575	cellular_component	CC	ND	3.3105e-7	9.3467e-05	AFUA_4G14090	UDP-glucose 4-epimerase (EC 5.1.3.2)	1.05	C-compound and carbohydrate metabolism	Metabolism	2.515e-06	0.0010864
AFUA_4G14600	UPF0075 domain protein		35.404	2.57308	13.7594		UPF0075 domain protein	GO:0005575	cellular_component	CC	ND	3.3105e-7	9.3467e-05	AFUA_4G14600	#N/A	#N/A	#N/A	#N/A	#N/A	#N/A
AFUA_8G00830	conserved hypothetical protein		98.4853	7.1577	13.7594		Uncharacterized protein	GO:0005575	cellular_component	CC	ND	3.3105e-7	9.3467e-05	AFUA_8G00830	#N/A	#N/A	#N/A	#N/A	#N/A	#N/A
AFUA_1G13670	conserved hypothetical protein		57.9215	4.2096	13.7594		Uncharacterized protein	GO:0005575	cellular_component	CC	ND	3.3105e-7	9.3467e-05	AFUA_1G13670	#N/A	#N/A	#N/A	#N/A	#N/A	#N/A
AFUA_1G14040	blue light-inducible protein Bli-3		73.0314	5.30776	13.7594		Blue light-inducible protein Bli-3	GO:0055114	oxidation-reduction process	BP	IEA	7.8355e-8	6.6367e-05	AFUA_1G14040	#N/A	#N/A	#N/A	#N/A	#N/A	#N/A
AFUA_3G01900	conserved hypothetical protein		243.336	17.8444	13.6365		Uncharacterized protein	GO:0005575	cellular_component	CC	ND	3.3105e-7	9.3467e-05	AFUA_3G01900	#N/A	#N/A	#N/A	#N/A	#N/A	#N/A
AFUA_7G00340	metallo-beta-lactamase domain protein, putative		499.282	36.746	13.5874		Metallo-beta-lactamase domain protein, putative	GO:0005575	cellular_component	CC	ND	3.3105e-7	9.3467e-05	AFUA_7G00340	#N/A	#N/A	#N/A	#N/A	#N/A	#N/A
AFUA_6G02950	aromatic ring-opening dioxygenase LigB subunit, putative		252.316	18.728	13.4727		Aromatic ring-opening dioxygenase LigB subunit, putative	GO:0055114	oxidation-reduction process	BP	IEA	7.8355e-8	6.6367e-05	AFUA_6G02950	Aromatic ring-opening dioxygenase LigB subunit, putative	1.05	C-compound and carbohydrate metabolism	Metabolism	2.515e-06	0.0010864
AFUA_6G10080	conserved hypothetical protein		250.891	18.6221	13.4727		Uncharacterized protein	GO:0005575	cellular_component	CC	ND	3.3105e-7	9.3467e-05	AFUA_6G10080	#N/A	#N/A	#N/A	#N/A	#N/A	#N/A
AFUA_5G07310	DUF500 domain protein		240.429	17.9848	13.3685		DUF500 domain protein	GO:0005575	cellular_component	CC	ND	3.3105e-7	9.3467e-05	AFUA_5G07310	#N/A	#N/A	#N/A	#N/A	#N/A	#N/A
AFUA_4G03740	MFS transporter, putative		50.3267	3.77562	13.3294		#N/A	#N/A	#N/A	#N/A	#N/A	#N/A	#N/A	AFUA_4G03740	MFS transporter, putative	1.2	secondary metabolism	Metabolism	0.0024405	0.078984
AFUA_7G00700	aldo-keto reductase (AKR13), puatative		340.809	25.7761	13.2219		Aldo-keto reductase (AKR13), puatative (EC 1.1.1.-)	GO:0055114	oxidation-reduction process	BP	IEA	7.8355e-8	6.6367e-05	AFUA_7G00700	Aldo-keto reductase (AKR13), puatative (EC 1.1.1.-)	1.05	C-compound and carbohydrate metabolism	Metabolism	2.515e-06	0.0010864
AFUA_5G11600	actin cytoskeleton organization protein (Cro1), putative		51.8031	3.92863	13.1861		#N/A	#N/A	#N/A	#N/A	#N/A	#N/A	#N/A	AFUA_5G11600	Actin cytoskeleton organization protein (Cro1), putative	43.01.03.09	development of asco- basidio- or zygospore	Cell type differentiation	0.035951	0.41473
AFUA_4G10100	FAD binding domain protein		687.556	52.3999	13.1213		FAD binding domain protein	GO:0055114	oxidation-reduction process	BP	IEA	7.8355e-8	6.6367e-05	AFUA_4G10100	FAD binding domain protein	1.06	lipid, fatty acid and isoprenoid metabolism	Metabolism	4.5362e-06	0.0010864
AFUA_2G05150	cell wall galactomannoprotein Mp2/allergen F17-like		23.9403	1.85592	12.8994		#N/A	#N/A	#N/A	#N/A	#N/A	#N/A	#N/A	AFUA_2G05150	#N/A	#N/A	#N/A	#N/A	#N/A	#N/A
AFUA_3G02000	C6 transcription factor Ctf1B-like, putative		85.2491	6.60876	12.8994		#N/A	#N/A	#N/A	#N/A	#N/A	#N/A	#N/A	AFUA_3G02000	C6 transcription factor Ctf1B-like, putative	1.2	secondary metabolism	Metabolism	0.0024405	0.078984
AFUA_8G04510	pirin, putative		374.196	29.0088	12.8994		Pirin, putative	GO:0005575	cellular_component	CC	ND	3.3105e-7	9.3467e-05	AFUA_8G04510	#N/A	#N/A	#N/A	#N/A	#N/A	#N/A
AFUA_6G00500	chitosanase, putative		88.5791	6.86692	12.8994		Chitosanase, putative (EC 3.2.1.132)	GO:0005575	cellular_component	CC	ND	3.3105e-7	9.3467e-05	AFUA_6G00500	Chitosanase, putative (EC 3.2.1.132)	01.05.03	polysaccharide metabolism	Metabolism	0.012778	0.25186
AFUA_1G17030	glycosyl transferase, putative		118.6	9.1942	12.8994		Glycosyl transferase, putative	GO:0005575	cellular_component	CC	ND	3.3105e-7	9.3467e-05	AFUA_1G17030	Glycosyl transferase, putative	1.05	C-compound and carbohydrate metabolism	Metabolism	2.515e-06	0.0010864
AFUA_4G12500	conserved hypothetical protein		708.633	54.9353	12.8994		Uncharacterized protein	GO:0005575	cellular_component	CC	ND	3.3105e-7	9.3467e-05	AFUA_4G12500	#N/A	#N/A	#N/A	#N/A	#N/A	#N/A
AFUA_6G00280	NmrA-like family protein		681.378	52.8224	12.8994		NmrA-like family protein (EC 1.3.1.-)	GO:0055114	oxidation-reduction process	BP	IEA	7.8355e-8	6.6367e-05	AFUA_6G00280	#N/A	#N/A	#N/A	#N/A	#N/A	#N/A
AFUA_6G14040	glycosyl transferase, putative		35.7895	2.77451	12.8994		Glycosyl transferase, putative (EC 2.4.1.-)	GO:0005575	cellular_component	CC	ND	3.3105e-7	9.3467e-05	AFUA_6G14040	Glycosyl transferase, putative (EC 2.4.1.-)	1.05	C-compound and carbohydrate metabolism	Metabolism	2.515e-06	0.0010864
AFUA_2G03820	carboxyphosphonoenolpyruvate phosphonomutase, putative		904.834	71.577	12.6414		Carboxyphosphonoenolpyruvate phosphonomutase, putative (EC 4.1.3.30)	GO:0005575	cellular_component	CC	ND	3.3105e-7	9.3467e-05	AFUA_2G03820	Carboxyphosphonoenolpyruvate phosphonomutase, putative (EC 4.1.3.30)	1.05	C-compound and carbohydrate metabolism	Metabolism	2.515e-06	0.0010864
AFUA_1G17370	heat shock protein Awh11, putative		334.152	26.7977	12.4694		#N/A	#N/A	#N/A	#N/A	#N/A	#N/A	#N/A	AFUA_1G17370	#N/A	#N/A	#N/A	#N/A	#N/A	#N/A
AFUA_2G16440	hypothetical protein		244.647	19.6198	12.4694		Uncharacterized protein	GO:0005575	cellular_component	CC	ND	3.3105e-7	9.3467e-05	AFUA_2G16440	#N/A	#N/A	#N/A	#N/A	#N/A	#N/A
AFUA_4G09190	S-adenosyl-methionine-sterol-C- methyltransferas		1144.62	92.9254	12.3177		S-adenosyl-methionine-sterol-C-methyltransferas (EC 2.1.1.41)	GO:0005575	cellular_component	CC	ND	3.3105e-7	9.3467e-05	AFUA_4G09190	S-adenosyl-methionine-sterol-C-methyltransferas (EC 2.1.1.41)	1.06	lipid, fatty acid and isoprenoid metabolism	Metabolism	4.5362e-06	0.0010864
AFUA_2G05810	dienelactone hydrolase		323.888	26.3882	12.274		Dienelactone hydrolase	GO:0005575	cellular_component	CC	ND	3.3105e-7	9.3467e-05	AFUA_2G05810	#N/A	#N/A	#N/A	#N/A	#N/A	#N/A
AFUA_5G13850	small oligopeptide transporter, OPT family		70.2166	5.72989	12.2544		#N/A	#N/A	#N/A	#N/A	#N/A	#N/A	#N/A	AFUA_5G13850	Small oligopeptide transporter, OPT family	1.02	nitrogen, sulfur and selenium metabolism	Metabolism	0.011195	0.25186
AFUA_1G01490	NACHT domain protein		54.6125	4.49599	12.1469		NACHT domain protein	GO:0005575	cellular_component	CC	ND	3.3105e-7	9.3467e-05	AFUA_1G01490	#N/A	#N/A	#N/A	#N/A	#N/A	#N/A
AFUA_1G14160	hypothetical protein		76.4613	6.35091	12.0394		Uncharacterized protein	GO:0005575	cellular_component	CC	ND	3.3105e-7	9.3467e-05	AFUA_1G14160	#N/A	#N/A	#N/A	#N/A	#N/A	#N/A
AFUA_5G08830	Woronin body protein HexA, putative		98.3481	8.16882	12.0394		#N/A	#N/A	#N/A	#N/A	#N/A	#N/A	#N/A	AFUA_5G08830	#N/A	#N/A	#N/A	#N/A	#N/A	#N/A
AFUA_6G14370	AraC-like ligand binding domain protein, putative		61.8122	5.13414	12.0394		#N/A	#N/A	#N/A	#N/A	#N/A	#N/A	#N/A	AFUA_6G14370	#N/A	#N/A	#N/A	#N/A	#N/A	#N/A
AFUA_2G05050	hypothetical protein		155.621	12.926	12.0394		Uncharacterized protein	GO:0005575	cellular_component	CC	ND	3.3105e-7	9.3467e-05	AFUA_2G05050	#N/A	#N/A	#N/A	#N/A	#N/A	#N/A
AFUA_5G10210	conserved hypothetical protein		46.4134	3.85511	12.0394		Uncharacterized protein	GO:0005575	cellular_component	CC	ND	3.3105e-7	9.3467e-05	AFUA_5G10210	#N/A	#N/A	#N/A	#N/A	#N/A	#N/A
AFUA_6G02220	MFS toxin efflux pump, putative		20.7658	1.72481	12.0394		#N/A	#N/A	#N/A	#N/A	#N/A	#N/A	#N/A	AFUA_6G02220	MFS toxin efflux pump, putative	20.09.16	cellular export and secretion	Cellular transport, transport facilitation and transport routes	0.00089546	0.066362
AFUA_1G04315	integral membrane protein, putative		236.211	19.6198	12.0394		Integral membrane protein, putative	GO:0005575	cellular_component	CC	ND	3.3105e-7	9.3467e-05	AFUA_1G04315	#N/A	#N/A	#N/A	#N/A	#N/A	#N/A
AFUA_2G14360	GPI anchored endo-1,3(4)-beta-glucanase, putative		40.514	3.3651	12.0394		Probable endo-1,3(4)-beta-glucanase AFUA_2G14360 (EC 3.2.1.6) (Mixed-linked glucanase AFUA_2G14360)	GO:0005575	cellular_component	CC	ND	3.3105e-7	9.3467e-05	AFUA_2G14360	#N/A	#N/A	#N/A	#N/A	#N/A	#N/A
AFUA_3G00720	DUF500 and UBA/TS-N domain protein		87.0251	7.22833	12.0394		DUF500 and UBA/TS-N domain protein	GO:0005575	cellular_component	CC	ND	3.3105e-7	9.3467e-05	AFUA_3G00720	#N/A	#N/A	#N/A	#N/A	#N/A	#N/A
AFUA_2G09480	conserved hypothetical protein		83.7203	6.95384	12.0394		Uncharacterized protein	GO:0005575	cellular_component	CC	ND	3.3105e-7	9.3467e-05	AFUA_2G09480	#N/A	#N/A	#N/A	#N/A	#N/A	#N/A
AFUA_2G16330	glucokinase, putative		27.2738	2.26537	12.0394		Glucokinase, putative (EC 2.7.1.2)	GO:0005575	cellular_component	CC	ND	3.3105e-7	9.3467e-05	AFUA_2G16330	Glucokinase, putative (EC 2.7.1.2)	1.05	C-compound and carbohydrate metabolism	Metabolism	2.515e-06	0.0010864
AFUA_4G04180	chitin synthase B		12.1915	1.01263	12.0394		#N/A	#N/A	#N/A	#N/A	#N/A	#N/A	#N/A	AFUA_4G04180	Chitin synthase B (EC 2.4.1.16)	01.05.03	polysaccharide metabolism	Metabolism	0.012778	0.25186
AFUA_6G11670	flavin-containing amine oxidasedehydrogenase, putative		25.3406	2.1048	12.0394		Flavin-containing amine oxidasedehydrogenase, putative	GO:0005575	cellular_component	CC	ND	3.3105e-7	9.3467e-05	AFUA_6G11670	#N/A	#N/A	#N/A	#N/A	#N/A	#N/A
AFUA_2G03860	plasma membrane low affinity zinc ion transporter, putative		256.229	21.7258	11.7937		#N/A	#N/A	#N/A	#N/A	#N/A	#N/A	#N/A	AFUA_2G03860	Plasma membrane low affinity zinc ion transporter, putative	34.01.01.01	homeostasis of metal ions (Na, K, Ca etc.)	Interaction with the environment	0.0011954	0.067524
AFUA_4G11280	DUF409 domain protein		173.15	14.9146	11.6095		#N/A	#N/A	#N/A	#N/A	#N/A	#N/A	#N/A	AFUA_4G11280	GPI mannosyltransferase 2 (EC 2.4.1.-) (GPI mannosyltransferase II) (GPI-MT-II) (Glycosylphosphatidylinositol-anchor biosynthesis protein 18)	1.05	C-compound and carbohydrate metabolism	Metabolism	2.515e-06	0.0010864
AFUA_3G08870	conserved hypothetical protein		48.965	4.21768	11.6095		Uncharacterized protein	GO:0005575	cellular_component	CC	ND	3.3105e-7	9.3467e-05	AFUA_3G08870	#N/A	#N/A	#N/A	#N/A	#N/A	#N/A
AFUA_8G01670	bifunctional catalase-peroxidase Cat2		714.849	62.1637	11.4995		Catalase-peroxidase (CP) (EC 1.11.1.21) (Catalase-2) (Peroxidase/catalase)	GO:0055114	oxidation-reduction process	BP	IEA	7.8355e-8	6.6367e-05	AFUA_8G01670	Catalase-peroxidase (CP) (EC 1.11.1.21) (Catalase-2) (Peroxidase/catalase)	32.01.01	oxidative stress response	Cell rescue, defense and virulence	0.030979	0.41473
AFUA_5G09980	acyl-CoA dehydrogenase, putative		212.881	18.6509	11.414		Acyl-CoA dehydrogenase, putative (EC 1.3.99.-)	GO:0055114	oxidation-reduction process	BP	IEA	7.8355e-8	6.6367e-05	AFUA_5G09980	Acyl-CoA dehydrogenase, putative (EC 1.3.99.-)	1.06	lipid, fatty acid and isoprenoid metabolism	Metabolism	4.5362e-06	0.0010864
AFUA_6G14120	conserved hypothetical protein		661.896	58.7544	11.2655		Uncharacterized protein	GO:0005575	cellular_component	CC	ND	3.3105e-7	9.3467e-05	AFUA_6G14120	#N/A	#N/A	#N/A	#N/A	#N/A	#N/A
AFUA_1G15820	fatty acid hydroxylase, putative		505.51	44.8888	11.2614		Fatty acid hydroxylase, putative (EC 1.14.-.-)	GO:0055114	oxidation-reduction process	BP	IEA	7.8355e-8	6.6367e-05	AFUA_1G15820	Fatty acid hydroxylase, putative (EC 1.14.-.-)	1.06	lipid, fatty acid and isoprenoid metabolism	Metabolism	4.5362e-06	0.0010864
AFUA_4G14580	O-methyltransferase, putative		25.4306	2.27476	11.1795		O-methyltransferase, putative	GO:0005575	cellular_component	CC	ND	3.3105e-7	9.3467e-05	AFUA_4G14580	O-methyltransferase, putative	1.2	secondary metabolism	Metabolism	0.0024405	0.078984
AFUA_8G05780	NACHT and Ankyrin domain protein		15.6871	1.4032	11.1795		NACHT and Ankyrin domain protein	GO:0005575	cellular_component	CC	ND	3.3105e-7	9.3467e-05	AFUA_8G05780	NACHT and Ankyrin domain protein	1.2	secondary metabolism	Metabolism	0.0024405	0.078984
AFUA_3G14530	lipase/esterase family protein, putative		37.9104	3.39107	11.1795		Lipase/esterase family protein, putative	GO:0005575	cellular_component	CC	ND	3.3105e-7	9.3467e-05	AFUA_3G14530	Lipase/esterase family protein, putative	1.06	lipid, fatty acid and isoprenoid metabolism	Metabolism	4.5362e-06	0.0010864
AFUA_6G09100	conserved hypothetical protein		273.824	24.4935	11.1795		Uncharacterized protein	GO:0005575	cellular_component	CC	ND	3.3105e-7	9.3467e-05	AFUA_6G09100	#N/A	#N/A	#N/A	#N/A	#N/A	#N/A
AFUA_2G03150	kinesin family protein		12.1614	1.08783	11.1795		Kinesin family protein	GO:0008152	metabolic process	BP	IEA	0.0026803	0.41559	AFUA_2G03150	#N/A	#N/A	#N/A	#N/A	#N/A	#N/A
AFUA_2G10030	actin cytoskeleton protein (VIP1), putative		1417.27	128.045	11.0685		#N/A	#N/A	#N/A	#N/A	#N/A	#N/A	#N/A	AFUA_2G10030	#N/A	#N/A	#N/A	#N/A	#N/A	#N/A
AFUA_3G11590	Taz1-interacting factor 1 (TAF1), putative		276.357	25.1877	10.9719		#N/A	#N/A	#N/A	#N/A	#N/A	#N/A	#N/A	AFUA_3G11590	#N/A	#N/A	#N/A	#N/A	#N/A	#N/A
AFUA_8G02480	conserved hypothetical protein		204.182	18.6221	10.9645		Uncharacterized protein	GO:0005575	cellular_component	CC	ND	3.3105e-7	9.3467e-05	AFUA_8G02480	#N/A	#N/A	#N/A	#N/A	#N/A	#N/A
AFUA_1G13820	hypothetical protein		202.467	18.4657	10.9645		Uncharacterized protein	GO:0005575	cellular_component	CC	ND	3.3105e-7	9.3467e-05	AFUA_1G13820	#N/A	#N/A	#N/A	#N/A	#N/A	#N/A
AFUA_5G01910	aldo-keto reductase (AKR), putative		447.246	41.3307	10.8212		Aldo-keto reductase (AKR), putative	GO:0005575	cellular_component	CC	ND	3.3105e-7	9.3467e-05	AFUA_5G01910	Aldo-keto reductase (AKR), putative	1.05	C-compound and carbohydrate metabolism	Metabolism	2.515e-06	0.0010864
AFUA_8G06750	UDP-glucose,sterol transferase, putative		120.762	11.2342	10.7495		UDP-glucose,sterol transferase, putative	GO:0005575	cellular_component	CC	ND	3.3105e-7	9.3467e-05	AFUA_8G06750	UDP-glucose,sterol transferase, putative	1.06	lipid, fatty acid and isoprenoid metabolism	Metabolism	4.5362e-06	0.0010864
AFUA_2G01220	GTP cyclohydrolase II, putative		52.7257	4.90494	10.7495		#N/A	#N/A	#N/A	#N/A	#N/A	#N/A	#N/A	AFUA_2G01220	#N/A	#N/A	#N/A	#N/A	#N/A	#N/A
AFUA_1G16850	sphinganine hydroxylase Sur2, putative		358.465	33.4501	10.7164		Sphinganine hydroxylase Sur2, putative	GO:0055114	oxidation-reduction process	BP	IEA	7.8355e-8	6.6367e-05	AFUA_1G16850	Sphinganine hydroxylase Sur2, putative	1.06	lipid, fatty acid and isoprenoid metabolism	Metabolism	4.5362e-06	0.0010864
AFUA_2G15370	MFS transporter family protein, putative		172.349	16.1048	10.7017		Autophagy-related protein 22-2	GO:0005575	cellular_component	CC	ND	3.3105e-7	9.3467e-05	AFUA_2G15370	#N/A	#N/A	#N/A	#N/A	#N/A	#N/A
AFUA_1G13370	aflatoxin B1-aldehyde reductase GliO-like, putative		131.901	12.5209	10.5345		Aflatoxin B1-aldehyde reductase GliO-like, putative (EC 1.1.1.-)	GO:0055114	oxidation-reduction process	BP	IEA	7.8355e-8	6.6367e-05	AFUA_1G13370	Aflatoxin B1-aldehyde reductase GliO-like, putative (EC 1.1.1.-)	1.05	C-compound and carbohydrate metabolism	Metabolism	2.515e-06	0.0010864
AFUA_1G03150	c-14 sterol reductase		969.459	92.4763	10.4833		C-14 sterol reductase	GO:0055114	oxidation-reduction process	BP	IEA	7.8355e-8	6.6367e-05	AFUA_1G03150	C-14 sterol reductase	1.06	lipid, fatty acid and isoprenoid metabolism	Metabolism	4.5362e-06	0.0010864
AFUA_5G08190	conserved hypothetical protein		25.8861	2.50846	10.3195		Uncharacterized protein	GO:0005575	cellular_component	CC	ND	3.3105e-7	9.3467e-05	AFUA_5G08190	#N/A	#N/A	#N/A	#N/A	#N/A	#N/A
AFUA_1G10930	ammonium transporter (Mep2), putative		25.71	2.4914	10.3195		#N/A	#N/A	#N/A	#N/A	#N/A	#N/A	#N/A	AFUA_1G10930	Ammonium transporter (Mep2), putative	20.01.01.07	anion transport	Cellular transport, transport facilitation and transport routes	0.047097	0.48136
AFUA_1G02090	quinone oxidoreductase, putative		326.747	31.663	10.3195		Quinone oxidoreductase, putative (EC 1.6.5.5)	GO:0055114	oxidation-reduction process	BP	IEA	7.8355e-8	6.6367e-05	AFUA_1G02090	#N/A	#N/A	#N/A	#N/A	#N/A	#N/A
AFUA_7G00360	UDP-galactose 4-epimerase, putative		394.37	38.2159	10.3195		UDP-galactose 4-epimerase, putative (EC 5.1.3.-)	GO:0008152	metabolic process	BP	IEA	0.0026803	0.41559	AFUA_7G00360	UDP-galactose 4-epimerase, putative (EC 5.1.3.-)	1.05	C-compound and carbohydrate metabolism	Metabolism	2.515e-06	0.0010864
AFUA_2G17500	cyanide hydratase/nitrilase, putative		31.6707	3.06901	10.3195		Cyanide hydratase/nitrilase, putative (EC 4.2.1.66)	GO:0005575	cellular_component	CC	ND	3.3105e-7	9.3467e-05	AFUA_2G17500	#N/A	#N/A	#N/A	#N/A	#N/A	#N/A
AFUA_4G04160	glutamyl-tRNA(Gln) amidotransferase subunit A, putative		33.5448	3.25061	10.3195		Glutamyl-tRNA(Gln) amidotransferase subunit A, putative	GO:0005575	cellular_component	CC	ND	3.3105e-7	9.3467e-05	AFUA_4G04160	Glutamyl-tRNA(Gln) amidotransferase subunit A, putative	1.06	lipid, fatty acid and isoprenoid metabolism	Metabolism	4.5362e-06	0.0010864
AFUA_4G03321	ubiE/COQ5 methyltransferase, putative		41.9931	4.06928	10.3195		#N/A	#N/A	#N/A	#N/A	#N/A	#N/A	#N/A	AFUA_4G03321	UbiE/COQ5 methyltransferase, putative (EC 2.1.1.-)	1.05	C-compound and carbohydrate metabolism	Metabolism	2.515e-06	0.0010864
AFUA_8G04650	3-hydroxyanthranilate 3,4-dioxygenase Bna1, putative		230.091	22.7711	10.1045		3-hydroxyanthranilate 3,4-dioxygenase 1 (EC 1.13.11.6) (3-hydroxyanthranilate oxygenase 1) (3-HAO-1) (3-hydroxyanthranilic acid dioxygenase 1) (HAD-1) (Biosynthesis of nicotinic acid protein 1-1)	GO:0055114	oxidation-reduction process	BP	IEA	7.8355e-8	6.6367e-05	AFUA_8G04650	#N/A	#N/A	#N/A	#N/A	#N/A	#N/A
AFUA_8G02720	protein phosphatase type 1 complex subunit Hex2/Reg1, putative		80.5947	7.97609	10.1045		Protein phosphatase type 1 complex subunit Hex2/Reg1, putative	GO:0005575	cellular_component	CC	ND	3.3105e-7	9.3467e-05	AFUA_8G02720	#N/A	#N/A	#N/A	#N/A	#N/A	#N/A
AFUA_4G11270	conserved hypothetical protein		297.362	29.745	9.99703		Uncharacterized protein	GO:0005575	cellular_component	CC	ND	3.3105e-7	9.3467e-05	AFUA_4G11270	#N/A	#N/A	#N/A	#N/A	#N/A	#N/A
AFUA_5G03800	high-affinity iron transporter FtrA		1270.83	127.343	9.97954		#N/A	#N/A	#N/A	#N/A	#N/A	#N/A	#N/A	AFUA_5G03800	High-affinity iron transporter FtrA	34.01.01.01	homeostasis of metal ions (Na, K, Ca etc.)	Interaction with the environment	0.0011954	0.067524
AFUA_1G04310	hypothetical protein		90.5475	9.15589	9.88954		Uncharacterized protein	GO:0005575	cellular_component	CC	ND	3.3105e-7	9.3467e-05	AFUA_1G04310	#N/A	#N/A	#N/A	#N/A	#N/A	#N/A
AFUA_5G11190	conserved hypothetical protein		61.5621	6.22497	9.88954		Uncharacterized protein	GO:0005575	cellular_component	CC	ND	3.3105e-7	9.3467e-05	AFUA_5G11190	#N/A	#N/A	#N/A	#N/A	#N/A	#N/A
AFUA_4G11710	oxidoreductase, zinc-binding dehydrogenase family superfamily		62.9896	6.36931	9.88954		Oxidoreductase, zinc-binding dehydrogenase family superfamily	GO:0055114	oxidation-reduction process	BP	IEA	7.8355e-8	6.6367e-05	AFUA_4G11710	Oxidoreductase, zinc-binding dehydrogenase family superfamily	1.05	C-compound and carbohydrate metabolism	Metabolism	2.515e-06	0.0010864
AFUA_7G01260	conserved hypothetical protein		54.082	5.54902	9.74621		Uncharacterized protein	GO:0005575	cellular_component	CC	ND	3.3105e-7	9.3467e-05	AFUA_7G01260	#N/A	#N/A	#N/A	#N/A	#N/A	#N/A
AFUA_5G01430	ThiJ/PfpI family protein		853.15	88.082	9.68586		#N/A	#N/A	#N/A	#N/A	#N/A	#N/A	#N/A	AFUA_5G01430	#N/A	#N/A	#N/A	#N/A	#N/A	#N/A
AFUA_4G04150	di-, tri-valent inorganic cation transporter, putative		31.1176	3.28954	9.45956		#N/A	#N/A	#N/A	#N/A	#N/A	#N/A	#N/A	AFUA_4G04150	Di-, tri-valent inorganic cation transporter, putative	32.07	detoxification	Cell rescue, defense and virulence	8.7992e-06	0.0014049
AFUA_5G08940	3-methylcrotonyl-CoA carboxylase, beta subunit (MccB), putative		17.9504	1.89759	9.45956		3-methylcrotonyl-CoA carboxylase, beta subunit (MccB), putative (EC 6.4.1.3)	GO:0008152	metabolic process	BP	IEA	0.0026803	0.41559	AFUA_5G08940	3-methylcrotonyl-CoA carboxylase, beta subunit (MccB), putative (EC 6.4.1.3)	1.05	C-compound and carbohydrate metabolism	Metabolism	2.515e-06	0.0010864
AFUA_6G10720	alpha-ketoglutarate-dependent taurine dioxygenase		52.3591	5.53505	9.45956		Alpha-ketoglutarate-dependent taurine dioxygenase (EC 1.14.11.17)	GO:0055114	oxidation-reduction process	BP	IEA	7.8355e-8	6.6367e-05	AFUA_6G10720	Alpha-ketoglutarate-dependent taurine dioxygenase (EC 1.14.11.17)	32.07.01	detoxification involving cytochrome P450	Cell rescue, defense and virulence	0.0092793	0.22383
AFUA_5G06820	hypothetical protein		31.3996	3.31936	9.45956		Uncharacterized protein	GO:0005575	cellular_component	CC	ND	3.3105e-7	9.3467e-05	AFUA_5G06820	#N/A	#N/A	#N/A	#N/A	#N/A	#N/A
AFUA_1G09980	mitochondrial carrier protein, putative		29.6951	3.13916	9.45956		Mitochondrial carrier protein, putative	GO:0005575	cellular_component	CC	ND	3.3105e-7	9.3467e-05	AFUA_1G09980	#N/A	#N/A	#N/A	#N/A	#N/A	#N/A
AFUA_5G14410	cysteine dioxygenase, putative		88.0787	9.31107	9.45956		Cysteine dioxygenase, putative (EC 1.13.11.-)	GO:0055114	oxidation-reduction process	BP	IEA	7.8355e-8	6.6367e-05	AFUA_5G14410	Cysteine dioxygenase, putative (EC 1.13.11.-)	01.01.09.03.02	degradation of cysteine	Metabolism	0.022939	0.36281
AFUA_2G04330	#N/A		24.4548	2.58519	9.45956		Salicylate hydroxylase, putative (EC 1.14.13.1)	GO:0055114	oxidation-reduction process	BP	IEA	7.8355e-8	6.6367e-05	AFUA_2G04330	Salicylate hydroxylase, putative (EC 1.14.13.1)	1.05	C-compound and carbohydrate metabolism	Metabolism	2.515e-06	0.0010864
AFUA_3G08210	conserved hypothetical protein		21.6979	2.29375	9.45956		Uncharacterized protein	GO:0005575	cellular_component	CC	ND	3.3105e-7	9.3467e-05	AFUA_3G08210	#N/A	#N/A	#N/A	#N/A	#N/A	#N/A
AFUA_5G01030	glyceraldehyde 3-phosphate dehydrogenase, putative		1018.62	108.881	9.35532		Glyceraldehyde-3-phosphate dehydrogenase (EC 1.2.1.12)	GO:0055114	oxidation-reduction process	BP	IEA	7.8355e-8	6.6367e-05	AFUA_5G01030	Glyceraldehyde-3-phosphate dehydrogenase (EC 1.2.1.12)	1.05	C-compound and carbohydrate metabolism	Metabolism	2.515e-06	0.0010864
AFUA_4G09060	phosphatidate cytidylyltransferase, putative		80.5927	8.63181	9.33671		#N/A	#N/A	#N/A	#N/A	#N/A	#N/A	#N/A	AFUA_4G09060	Phosphatidate cytidylyltransferase, putative (EC 2.7.7.41)	1.06	lipid, fatty acid and isoprenoid metabolism	Metabolism	4.5362e-06	0.0010864
AFUA_8G01800	thiosulfate sulfurtransferase, putative		97.2187	10.5985	9.17291		Thiosulfate sulfurtransferase, putative (EC 2.8.1.-)	GO:0005575	cellular_component	CC	ND	3.3105e-7	9.3467e-05	AFUA_8G01800	Thiosulfate sulfurtransferase, putative (EC 2.8.1.-)	32.07.03	detoxification by modification	Cell rescue, defense and virulence	0.047304	0.48136
AFUA_6G06640	FK506 suppressor Sfk1, putative		244.47	26.8914	9.09101		#N/A	#N/A	#N/A	#N/A	#N/A	#N/A	#N/A	AFUA_6G06640	#N/A	#N/A	#N/A	#N/A	#N/A	#N/A
AFUA_5G07630	ubiE/COQ5 methyltransferase, putative		67.0328	7.42369	9.02958		UbiE/COQ5 methyltransferase, putative (EC 2.1.1.-)	GO:0005575	cellular_component	CC	ND	3.3105e-7	9.3467e-05	AFUA_5G07630	UbiE/COQ5 methyltransferase, putative (EC 2.1.1.-)	1.05	C-compound and carbohydrate metabolism	Metabolism	2.515e-06	0.0010864
AFUA_7G06580	FAD/FMN-containing isoamyl alcohol oxidase MreA-like, putative		32.5274	3.60232	9.02958		FAD/FMN-containing isoamyl alcohol oxidase MreA-like, putative	GO:0055114	oxidation-reduction process	BP	IEA	7.8355e-8	6.6367e-05	AFUA_7G06580	FAD/FMN-containing isoamyl alcohol oxidase MreA-like, putative	1.05	C-compound and carbohydrate metabolism	Metabolism	2.515e-06	0.0010864
AFUA_4G10350	polyubiquitin UbiD/Ubi4, putative		1346.78	149.982	8.97958		Polyubiquitin UbiD/Ubi4, putative	GO:0005575	cellular_component	CC	ND	3.3105e-7	9.3467e-05	AFUA_4G10350	Polyubiquitin UbiD/Ubi4, putative	43.01.03.09	development of asco- basidio- or zygospore	Cell type differentiation	0.035951	0.41473
AFUA_4G10690	iron-sulfur cluster assembly accessory protein Isa1, putative		895.332	100.755	8.88625		Iron-sulfur cluster assembly accessory protein Isa1, putative	GO:0005575	cellular_component	CC	ND	3.3105e-7	9.3467e-05	AFUA_4G10690	Iron-sulfur cluster assembly accessory protein Isa1, putative	34.01.01.01	homeostasis of metal ions (Na, K, Ca etc.)	Interaction with the environment	0.0011954	0.067524
AFUA_5G11750	LON domain serine protease, putative		72.914	8.24324	8.8453		Lon protease homolog 2, peroxisomal (EC 3.4.21.-)	GO:0005575	cellular_component	CC	ND	3.3105e-7	9.3467e-05	AFUA_5G11750	#N/A	#N/A	#N/A	#N/A	#N/A	#N/A
AFUA_5G01450	NADH-dependent flavin oxidoreductase, putative		87.446	9.9206	8.81459		NADH-dependent flavin oxidoreductase, putative (EC 1.-.-.-)	GO:0055114	oxidation-reduction process	BP	IEA	7.8355e-8	6.6367e-05	AFUA_5G01450	NADH-dependent flavin oxidoreductase, putative (EC 1.-.-.-)	1.2	secondary metabolism	Metabolism	0.0024405	0.078984
AFUA_7G06770	conserved hypothetical protein		418.492	47.6608	8.78064		#N/A	#N/A	#N/A	#N/A	#N/A	#N/A	#N/A	AFUA_7G06770	#N/A	#N/A	#N/A	#N/A	#N/A	#N/A
AFUA_4G11250	carbonic anhydrase Nce103, putative		3211.81	366.236	8.7698		Carbonic anhydrase (EC 4.2.1.1)	GO:0005575	cellular_component	CC	ND	3.3105e-7	9.3467e-05	AFUA_4G11250	Carbonic anhydrase (EC 4.2.1.1)	1.05	C-compound and carbohydrate metabolism	Metabolism	2.515e-06	0.0010864
AFUA_1G12250	mitochondrial hypoxia responsive domain protein		7762.47	886.317	8.75812		#N/A	#N/A	#N/A	#N/A	#N/A	#N/A	#N/A	AFUA_1G12250	#N/A	#N/A	#N/A	#N/A	#N/A	#N/A
AFUA_2G01940	conserved hypothetical protein		244.548	28.0062	8.7319		Uncharacterized protein	GO:0005575	cellular_component	CC	ND	3.3105e-7	9.3467e-05	AFUA_2G01940	#N/A	#N/A	#N/A	#N/A	#N/A	#N/A
AFUA_4G04280	AN1 zinc finger protein		576.566	66.6947	8.64486		#N/A	#N/A	#N/A	#N/A	#N/A	#N/A	#N/A	AFUA_4G04280	#N/A	#N/A	#N/A	#N/A	#N/A	#N/A
AFUA_4G00680	aquaglyceroporin, putative		21.9221	2.5492	8.5996		#N/A	#N/A	#N/A	#N/A	#N/A	#N/A	#N/A	AFUA_4G00680	Aquaglyceroporin, putative	1.06	lipid, fatty acid and isoprenoid metabolism	Metabolism	4.5362e-06	0.0010864
AFUA_1G17230	conserved hypothetical protein		14.3375	1.66723	8.5996		Probable rhamnogalacturonate lyase B (EC 4.2.2.-)	GO:0005575	cellular_component	CC	ND	3.3105e-7	9.3467e-05	AFUA_1G17230	#N/A	#N/A	#N/A	#N/A	#N/A	#N/A
AFUA_1G05010	MFS multidrug transporter, putative		13.6341	1.58544	8.5996		#N/A	#N/A	#N/A	#N/A	#N/A	#N/A	#N/A	AFUA_1G05010	MFS multidrug transporter, putative	20.09.16	cellular export and secretion	Cellular transport, transport facilitation and transport routes	0.00089546	0.066362
AFUA_7G05500	glutathione S-transferase, putative		327.219	38.0504	8.5996		Glutathione S-transferase, putative (EC 2.5.1.18)	GO:0055114	oxidation-reduction process	BP	IDA	7.8355e-8	6.6367e-05	AFUA_7G05500	Glutathione S-transferase, putative (EC 2.5.1.18)	1.2	secondary metabolism	Metabolism	0.0024405	0.078984
AFUA_4G02890	hypothetical protein		40.2061	4.67535	8.5996		Uncharacterized protein	GO:0005575	cellular_component	CC	ND	3.3105e-7	9.3467e-05	AFUA_4G02890	#N/A	#N/A	#N/A	#N/A	#N/A	#N/A
AFUA_1G15640	conserved hypothetical protein		56.2407	6.53992	8.5996		Uncharacterized protein	GO:0005575	cellular_component	CC	ND	3.3105e-7	9.3467e-05	AFUA_1G15640	#N/A	#N/A	#N/A	#N/A	#N/A	#N/A
AFUA_4G09450	hypothetical protein		54.6152	6.35091	8.5996		Uncharacterized protein	GO:0005575	cellular_component	CC	ND	3.3105e-7	9.3467e-05	AFUA_4G09450	#N/A	#N/A	#N/A	#N/A	#N/A	#N/A
AFUA_7G00320	extracelular proline-glycine rich protein		30.5775	3.55569	8.5996		Extracelular proline-glycine rich protein	GO:0005575	cellular_component	CC	ND	3.3105e-7	9.3467e-05	AFUA_7G00320	#N/A	#N/A	#N/A	#N/A	#N/A	#N/A
AFUA_6G06970	conserved hypothetical protein		14.5585	1.69292	8.5996		Uncharacterized protein	GO:0005575	cellular_component	CC	ND	3.3105e-7	9.3467e-05	AFUA_6G06970	#N/A	#N/A	#N/A	#N/A	#N/A	#N/A
AFUA_1G13220	cytochrome P450 pisatin demethylase, putative		18.4901	2.15011	8.5996		Cytochrome P450 pisatin demethylase, putative (EC 1.14.-.-)	GO:0055114	oxidation-reduction process	BP	IEA	7.8355e-8	6.6367e-05	AFUA_1G13220	Cytochrome P450 pisatin demethylase, putative (EC 1.14.-.-)	1.2	secondary metabolism	Metabolism	0.0024405	0.078984
AFUA_1G17410	beta-glucosidase, putative		12.2707	1.42689	8.5996		Probable beta-glucosidase M (EC 3.2.1.21) (Beta-D-glucoside glucohydrolase M) (Cellobiase M) (Gentiobiase M)	GO:0005575	cellular_component	CC	ND	3.3105e-7	9.3467e-05	AFUA_1G17410	Probable beta-glucosidase M (EC 3.2.1.21) (Beta-D-glucoside glucohydrolase M) (Cellobiase M) (Gentiobiase M)	01.05.03	polysaccharide metabolism	Metabolism	0.012778	0.25186
AFUA_4G07680	conserved hypothetical protein		107.675	12.5209	8.5996		#N/A	#N/A	#N/A	#N/A	#N/A	#N/A	#N/A	AFUA_4G07680	#N/A	#N/A	#N/A	#N/A	#N/A	#N/A
AFUA_4G11800	alkaline serine protease Alp1		163.711	19.037	8.5996		Alkaline protease 1 (ALP) (EC 3.4.21.63) (Aspergillopeptidase B) (Aspergillus proteinase B) (Elastase) (Elastinolytic serine proteinase) (Oryzin) (allergen Asp f 13)	GO:0005575	cellular_component	CC	ND	3.3105e-7	9.3467e-05	AFUA_4G11800	Alkaline protease 1 (ALP) (EC 3.4.21.63) (Aspergillopeptidase B) (Aspergillus proteinase B) (Elastase) (Elastinolytic serine proteinase) (Oryzin) (allergen Asp f 13)	14.13.04.02	vacuolar protein degradation	Protein fate (folding, modification, destination)	0.00096981	0.066362
AFUA_2G16500	conserved hypothetical protein		253.99	29.5351	8.5996		Uncharacterized protein	GO:0005575	cellular_component	CC	ND	3.3105e-7	9.3467e-05	AFUA_2G16500	#N/A	#N/A	#N/A	#N/A	#N/A	#N/A
AFUA_5G01710	cytochrome P450 phenylacetate 2-hydroxylase, putative		73.2437	8.51711	8.5996		Cytochrome P450 phenylacetate 2-hydroxylase, putative (EC 1.14.-.-)	GO:0055114	oxidation-reduction process	BP	IEA	7.8355e-8	6.6367e-05	AFUA_5G01710	Cytochrome P450 phenylacetate 2-hydroxylase, putative (EC 1.14.-.-)	1.2	secondary metabolism	Metabolism	0.0024405	0.078984
AFUA_4G13630	PE repeat family protein		15.9065	1.84967	8.5996		PE repeat family protein	GO:0005575	cellular_component	CC	ND	3.3105e-7	9.3467e-05	AFUA_4G13630	#N/A	#N/A	#N/A	#N/A	#N/A	#N/A
AFUA_3G00380	beta-galactosidase, putative		9.3364	1.08568	8.5996		Probable beta-galactosidase E (EC 3.2.1.23) (Lactase E)	GO:0005575	cellular_component	CC	ND	3.3105e-7	9.3467e-05	AFUA_3G00380	Probable beta-galactosidase E (EC 3.2.1.23) (Lactase E)	1.05	C-compound and carbohydrate metabolism	Metabolism	2.515e-06	0.0010864
AFUA_3G04030	coenzyme A transferase, putative		17.9287	2.08483	8.5996		Succinyl-CoA:3-ketoacid-coenzyme A transferase (EC 2.8.3.5)	GO:0008152	metabolic process	BP	IEA	0.0026803	0.41559	AFUA_3G04030	Succinyl-CoA:3-ketoacid-coenzyme A transferase (EC 2.8.3.5)	1.05	C-compound and carbohydrate metabolism	Metabolism	2.515e-06	0.0010864
AFUA_4G11810	conserved hypothetical protein		46.3159	5.38582	8.5996		Uncharacterized protein	GO:0005575	cellular_component	CC	ND	3.3105e-7	9.3467e-05	AFUA_4G11810	#N/A	#N/A	#N/A	#N/A	#N/A	#N/A
AFUA_8G02620	CobW domain protein		15.9602	1.85592	8.5996		CobW domain protein	GO:0005575	cellular_component	CC	ND	3.3105e-7	9.3467e-05	AFUA_8G02620	#N/A	#N/A	#N/A	#N/A	#N/A	#N/A
AFUA_4G13570	thiol methyltransferase, putative		363.915	42.7059	8.52142		Thiol methyltransferase, putative	GO:0005575	cellular_component	CC	ND	3.3105e-7	9.3467e-05	AFUA_4G13570	#N/A	#N/A	#N/A	#N/A	#N/A	#N/A
AFUA_3G08900	tubulin-specific chaperone c, putative		570.602	67.1581	8.4964		Tubulin-specific chaperone c, putative	GO:0005575	cellular_component	CC	ND	3.3105e-7	9.3467e-05	AFUA_3G08900	#N/A	#N/A	#N/A	#N/A	#N/A	#N/A
AFUA_1G05170	MFS monocarboxylate transporter, putative		127.565	15.0852	8.45627		#N/A	#N/A	#N/A	#N/A	#N/A	#N/A	#N/A	AFUA_1G05170	MFS monocarboxylate transporter, putative	1.2	secondary metabolism	Metabolism	0.0024405	0.078984
AFUA_6G11560	integral membrane protein, putative		143.675	16.9903	8.45627		Integral membrane protein, putative	GO:0005575	cellular_component	CC	ND	3.3105e-7	9.3467e-05	AFUA_6G11560	#N/A	#N/A	#N/A	#N/A	#N/A	#N/A
AFUA_1G09940	conserved hypothetical protein		791.849	93.7627	8.44525		Uncharacterized protein	GO:0005575	cellular_component	CC	ND	3.3105e-7	9.3467e-05	AFUA_1G09940	#N/A	#N/A	#N/A	#N/A	#N/A	#N/A
AFUA_6G14280	flavin-binding monooxygenase-like protein		90.9575	10.7928	8.42761		Flavin-binding monooxygenase-like protein	GO:0055114	oxidation-reduction process	BP	IEA	7.8355e-8	6.6367e-05	AFUA_6G14280	Flavin-binding monooxygenase-like protein	1.2	secondary metabolism	Metabolism	0.0024405	0.078984
AFUA_6G10450	conserved hypothetical protein		368.072	44.1248	8.34161		Uncharacterized protein	GO:0005575	cellular_component	CC	ND	3.3105e-7	9.3467e-05	AFUA_6G10450	#N/A	#N/A	#N/A	#N/A	#N/A	#N/A
AFUA_7G05910	purine permease, putative		93.8372	11.2881	8.31295		#N/A	#N/A	#N/A	#N/A	#N/A	#N/A	#N/A	AFUA_7G05910	#N/A	#N/A	#N/A	#N/A	#N/A	#N/A
AFUA_7G06420	NADH-dependent flavin oxidoreductase, putative		7310.81	880.524	8.3028		NADH-dependent flavin oxidoreductase, putative (EC 1.-.-.-)	GO:0055114	oxidation-reduction process	BP	IEA	7.8355e-8	6.6367e-05	AFUA_7G06420	NADH-dependent flavin oxidoreductase, putative (EC 1.-.-.-)	1.2	secondary metabolism	Metabolism	0.0024405	0.078984
AFUA_4G03730	dienelactone hydrolase		350.723	42.3437	8.28277		Dienelactone hydrolase	GO:0005575	cellular_component	CC	ND	3.3105e-7	9.3467e-05	AFUA_4G03730	#N/A	#N/A	#N/A	#N/A	#N/A	#N/A
AFUA_8G05030	conserved hypothetical protein		565.098	68.3406	8.26885		Uncharacterized protein	GO:0005575	cellular_component	CC	ND	3.3105e-7	9.3467e-05	AFUA_8G05030	#N/A	#N/A	#N/A	#N/A	#N/A	#N/A
AFUA_1G02330	conserved hypothetical protein		148.697	18.0116	8.25562		Uncharacterized protein	GO:0005575	cellular_component	CC	ND	3.3105e-7	9.3467e-05	AFUA_1G02330	#N/A	#N/A	#N/A	#N/A	#N/A	#N/A
AFUA_4G01305	#N/A		1546.11	187.28	8.25562		#N/A	#N/A	#N/A	#N/A	#N/A	#N/A	#N/A	AFUA_4G01305	#N/A	#N/A	#N/A	#N/A	#N/A	#N/A
AFUA_5G07640	RNA 3'-terminal phosphate cyclase, putative		39.6292	4.8508	8.16962		RNA 3'-terminal phosphate cyclase, putative (EC 6.5.1.4)	GO:0005575	cellular_component	CC	ND	3.3105e-7	9.3467e-05	AFUA_5G07640	#N/A	#N/A	#N/A	#N/A	#N/A	#N/A
AFUA_6G02535	conserved hypothetical protein		256.458	31.3916	8.16962		Uncharacterized protein	GO:0005575	cellular_component	CC	ND	3.3105e-7	9.3467e-05	AFUA_6G02535	#N/A	#N/A	#N/A	#N/A	#N/A	#N/A
AFUA_1G07470	autophagic death protein Aut7/IDI-7, putative		746.347	92.3283	8.08362		#N/A	#N/A	#N/A	#N/A	#N/A	#N/A	#N/A	AFUA_1G07470	Autophagy-related protein 8 (Autophagy-related ubiquitin-like modifier atg8)	14.13.04	lysosomal and vacuolar protein degradation	Protein fate (folding, modification, destination)	0.0071082	0.2128
AFUA_4G03960	C6 transcription factor Ctf1A, putative		165.375	20.5126	8.06212		#N/A	#N/A	#N/A	#N/A	#N/A	#N/A	#N/A	AFUA_4G03960	C6 transcription factor Ctf1A, putative	1.2	secondary metabolism	Metabolism	0.0024405	0.078984
AFUA_4G08270	YeeE/YedE family integral membrane protein		78.972	9.83916	8.02629		YeeE/YedE family integral membrane protein	GO:0005575	cellular_component	CC	ND	3.3105e-7	9.3467e-05	AFUA_4G08270	#N/A	#N/A	#N/A	#N/A	#N/A	#N/A
AFUA_7G06550	fungal specific transcription factor, putative		43.5125	5.42125	8.02629		#N/A	#N/A	#N/A	#N/A	#N/A	#N/A	#N/A	AFUA_7G06550	#N/A	#N/A	#N/A	#N/A	#N/A	#N/A
AFUA_4G03350	exo-beta-1,3-glucanase, putative		44.8195	5.63439	7.95463		Exo-beta-1,3-glucanase, putative (EC 3.2.1.-)	GO:0005575	cellular_component	CC	ND	3.3105e-7	9.3467e-05	AFUA_4G03350	Exo-beta-1,3-glucanase, putative (EC 3.2.1.-)	01.05.03	polysaccharide metabolism	Metabolism	0.012778	0.25186
AFUA_3G05760	C6 transcription factor (Fcr1), putative		1542.73	194.525	7.93074		#N/A	#N/A	#N/A	#N/A	#N/A	#N/A	#N/A	AFUA_3G05760	C6 transcription factor (Fcr1), putative	32.05.01.03	chemical agent resistance	Cell rescue, defense and virulence	0.02846	0.40095
AFUA_3G10760	phosphoketolase, putative		352.83	44.5629	7.91756		Phosphoketolase, putative	GO:0008152	metabolic process	BP	IEA	0.0026803	0.41559	AFUA_3G10760	Phosphoketolase, putative	1.05	C-compound and carbohydrate metabolism	Metabolism	2.515e-06	0.0010864
AFUA_4G03460	HLH DNA binding domain protein, putative		2308.57	292.988	7.87938		#N/A	#N/A	#N/A	#N/A	#N/A	#N/A	#N/A	AFUA_4G03460	#N/A	#N/A	#N/A	#N/A	#N/A	#N/A
AFUA_8G05580	acetyl-coA hydrolase Ach1, putative		1492.71	192.169	7.76768		#N/A	#N/A	#N/A	#N/A	#N/A	#N/A	#N/A	AFUA_8G05580	Acetyl-coA hydrolase Ach1, putative (EC 2.8.3.8)	1.05	C-compound and carbohydrate metabolism	Metabolism	2.515e-06	0.0010864
AFUA_4G14560	polyketide synthase, putative		4.76926	0.616212	7.73964		Polyketide synthase, putative	GO:0005575	cellular_component	CC	ND	3.3105e-7	9.3467e-05	AFUA_4G14560	Polyketide synthase, putative	1.2	secondary metabolism	Metabolism	0.0024405	0.078984
AFUA_2G08890	dihydrofolate reductase, putative		100.833	13.0281	7.73964		Dihydrofolate reductase, putative (EC 1.5.1.3)	GO:0055114	oxidation-reduction process	BP	IEA	7.8355e-8	6.6367e-05	AFUA_2G08890	#N/A	#N/A	#N/A	#N/A	#N/A	#N/A
AFUA_1G05850	erythromycin esterase, putative		18.3267	2.3679	7.73964		Erythromycin esterase, putative	GO:0005575	cellular_component	CC	ND	3.3105e-7	9.3467e-05	AFUA_1G05850	#N/A	#N/A	#N/A	#N/A	#N/A	#N/A
AFUA_8G07060	hydrophobin, putative		54.5102	7.04299	7.73964		#N/A	#N/A	#N/A	#N/A	#N/A	#N/A	#N/A	AFUA_8G07060	#N/A	#N/A	#N/A	#N/A	#N/A	#N/A
AFUA_6G00490	DUF521 domain protein		13.9632	1.80412	7.73964		DUF521 domain protein	GO:0005575	cellular_component	CC	ND	3.3105e-7	9.3467e-05	AFUA_6G00490	DUF521 domain protein	1.2	secondary metabolism	Metabolism	0.0024405	0.078984
AFUA_2G03670	hypothetical protein		41.8896	5.41235	7.73964		Uncharacterized protein	GO:0005575	cellular_component	CC	ND	3.3105e-7	9.3467e-05	AFUA_2G03670	#N/A	#N/A	#N/A	#N/A	#N/A	#N/A
AFUA_4G11310	fructose-1,6-bisphosphatase Fbp1, putative		120.107	15.5185	7.73964		Fructose-1,6-bisphosphatase Fbp1, putative (EC 3.1.3.11)	GO:0005975	carbohydrate metabolic process	BP	IEA	0.0048223	0.45384	AFUA_4G11310	Fructose-1,6-bisphosphatase Fbp1, putative (EC 3.1.3.11)	1.05	C-compound and carbohydrate metabolism	Metabolism	2.515e-06	0.0010864
AFUA_2G02120	phosphoglucomutase, putative		121.828	15.7408	7.73964		Phosphoglucomutase, putative (EC 5.4.2.8)	GO:0005975	carbohydrate metabolic process	BP	IEA	0.0048223	0.45384	AFUA_2G02120	Phosphoglucomutase, putative (EC 5.4.2.8)	1.05	C-compound and carbohydrate metabolism	Metabolism	2.515e-06	0.0010864
AFUA_3G14720	MFS transporter, putative		29.3227	3.78864	7.73964		#N/A	#N/A	#N/A	#N/A	#N/A	#N/A	#N/A	AFUA_3G14720	MFS transporter, putative	32.07	detoxification	Cell rescue, defense and virulence	8.7992e-06	0.0014049
AFUA_1G12100	conserved hypothetical protein		28.1576	3.6381	7.73964		Uncharacterized protein	GO:0005575	cellular_component	CC	ND	3.3105e-7	9.3467e-05	AFUA_1G12100	#N/A	#N/A	#N/A	#N/A	#N/A	#N/A
AFUA_1G13410	conserved hypothetical protein		36.3401	4.69533	7.73964		Uncharacterized protein	GO:0005575	cellular_component	CC	ND	3.3105e-7	9.3467e-05	AFUA_1G13410	#N/A	#N/A	#N/A	#N/A	#N/A	#N/A
AFUA_2G01270	ferric-chelate reductase, putative		28.3453	3.66236	7.73964		Ferric-chelate reductase, putative (EC 1.16.1.-)	GO:0055114	oxidation-reduction process	BP	IEA	7.8355e-8	6.6367e-05	AFUA_2G01270	Ferric-chelate reductase, putative (EC 1.16.1.-)	34.01.01.01	homeostasis of metal ions (Na, K, Ca etc.)	Interaction with the environment	0.0011954	0.067524
AFUA_4G14210	conserved hypothetical protein		26.9955	3.48796	7.73964		Uncharacterized protein	GO:0005575	cellular_component	CC	ND	3.3105e-7	9.3467e-05	AFUA_4G14210	#N/A	#N/A	#N/A	#N/A	#N/A	#N/A
AFUA_5G10200	hypothetical protein		44.2896	5.72243	7.73964		Uncharacterized protein	GO:0005575	cellular_component	CC	ND	3.3105e-7	9.3467e-05	AFUA_5G10200	#N/A	#N/A	#N/A	#N/A	#N/A	#N/A
AFUA_1G17400	peptidase S41 family protein		52.4104	6.77169	7.73964		Peptidase S41 family protein	GO:0005575	cellular_component	CC	ND	3.3105e-7	9.3467e-05	AFUA_1G17400	#N/A	#N/A	#N/A	#N/A	#N/A	#N/A
AFUA_3G12200	small oligopeptide transporter, OPT family		11.2185	1.44948	7.73964		Small oligopeptide transporter, OPT family	GO:0005575	cellular_component	CC	ND	3.3105e-7	9.3467e-05	AFUA_3G12200	Small oligopeptide transporter, OPT family	1.02	nitrogen, sulfur and selenium metabolism	Metabolism	0.011195	0.25186
AFUA_2G05380	C6 transcription factor, putative		22.2607	2.8762	7.73964		#N/A	#N/A	#N/A	#N/A	#N/A	#N/A	#N/A	AFUA_2G05380	#N/A	#N/A	#N/A	#N/A	#N/A	#N/A
AFUA_4G14460	conserved hypothetical protein		26.5737	3.43346	7.73964		Uncharacterized protein	GO:0005575	cellular_component	CC	ND	3.3105e-7	9.3467e-05	AFUA_4G14460	#N/A	#N/A	#N/A	#N/A	#N/A	#N/A
AFUA_6G11420	DUF1446 domain protein		14.5609	1.88135	7.73964		DUF1446 domain protein	GO:0005575	cellular_component	CC	ND	3.3105e-7	9.3467e-05	AFUA_6G11420	#N/A	#N/A	#N/A	#N/A	#N/A	#N/A
AFUA_8G06440	fructosyl amino acid oxidase, putative		130.538	16.8661	7.73964		Fructosyl amino acid oxidase, putative (EC 1.5.3.-)	GO:0055114	oxidation-reduction process	BP	IEA	7.8355e-8	6.6367e-05	AFUA_8G06440	Fructosyl amino acid oxidase, putative (EC 1.5.3.-)	1.2	secondary metabolism	Metabolism	0.0024405	0.078984
AFUA_1G02040	extracellular SCP domain protein Pry1, putative		64.6661	8.35518	7.73964		#N/A	#N/A	#N/A	#N/A	#N/A	#N/A	#N/A	AFUA_1G02040	#N/A	#N/A	#N/A	#N/A	#N/A	#N/A
AFUA_5G01360	cytochrome P450, putative		16.8055	2.17136	7.73964		Cytochrome P450, putative (EC 1.14.-.-)	GO:0055114	oxidation-reduction process	BP	IEA	7.8355e-8	6.6367e-05	AFUA_5G01360	Cytochrome P450, putative (EC 1.14.-.-)	1.2	secondary metabolism	Metabolism	0.0024405	0.078984
AFUA_1G07040	fructosamine-3-kinase, putative		190.039	24.8999	7.63214		Fructosamine-3-kinase, putative (EC 2.7.1.-)	GO:0005575	cellular_component	CC	ND	3.3105e-7	9.3467e-05	AFUA_1G07040	Fructosamine-3-kinase, putative (EC 2.7.1.-)	01.05.09	aminosaccharide metabolism	Metabolism	0.018129	0.31014
AFUA_7G04690	FAD dependent sulfhydryl oxidase Erv2, putative		214.922	28.2929	7.59631		Sulfhydryl oxidase (EC 1.8.3.2)	GO:0055114	oxidation-reduction process	BP	IEA	7.8355e-8	6.6367e-05	AFUA_7G04690	Sulfhydryl oxidase (EC 1.8.3.2)	34.01.01.01	homeostasis of metal ions (Na, K, Ca etc.)	Interaction with the environment	0.0011954	0.067524
AFUA_3G01590	conserved hypothetical protein		101.752	13.5225	7.52465		Uncharacterized protein	GO:0005575	cellular_component	CC	ND	3.3105e-7	9.3467e-05	AFUA_3G01590	#N/A	#N/A	#N/A	#N/A	#N/A	#N/A
AFUA_2G15650	DUF323 domain protein		39.1355	5.20098	7.52465		#N/A	#N/A	#N/A	#N/A	#N/A	#N/A	#N/A	AFUA_2G15650	#N/A	#N/A	#N/A	#N/A	#N/A	#N/A
AFUA_4G12930	ubiquinone biosynthesis monooxgenase (Coq6), putative		595.381	79.5541	7.48398		Ubiquinone biosynthesis monooxgenase (Coq6), putative (EC 1.14.13.-)	GO:0055114	oxidation-reduction process	BP	IEA	7.8355e-8	6.6367e-05	AFUA_4G12930	Ubiquinone biosynthesis monooxgenase (Coq6), putative (EC 1.14.13.-)	1.2	secondary metabolism	Metabolism	0.0024405	0.078984
AFUA_1G11460	1,3-beta-glucanosyltransferase Bgt1		1512.99	204.661	7.39264		1,3-beta-glucanosyltransferase Bgt1 (EC 3.2.1.-)	GO:0005575	cellular_component	CC	ND	3.3105e-7	9.3467e-05	AFUA_1G11460	1,3-beta-glucanosyltransferase Bgt1 (EC 3.2.1.-)	1.05	C-compound and carbohydrate metabolism	Metabolism	2.515e-06	0.0010864
AFUA_4G08250	raffinose synthase protein Sip1, putative		75.3136	10.2364	7.35744		Raffinose synthase protein Sip1, putative	GO:0005575	cellular_component	CC	ND	3.3105e-7	9.3467e-05	AFUA_4G08250	Raffinose synthase protein Sip1, putative	1.05	C-compound and carbohydrate metabolism	Metabolism	2.515e-06	0.0010864
AFUA_4G00460	chlorohydrolase family protein, putative		30.3636	4.1539	7.30966		Chlorohydrolase family protein, putative (EC 3.8.1.-)	GO:0005575	cellular_component	CC	ND	3.3105e-7	9.3467e-05	AFUA_4G00460	Chlorohydrolase family protein, putative (EC 3.8.1.-)	1.05	C-compound and carbohydrate metabolism	Metabolism	2.515e-06	0.0010864
AFUA_8G00440	steroid monooxygenase, putative		17.7289	2.4254	7.30966		Steroid monooxygenase, putative (EC 1.-.-.-)	GO:0055114	oxidation-reduction process	BP	IEA	7.8355e-8	6.6367e-05	AFUA_8G00440	#N/A	#N/A	#N/A	#N/A	#N/A	#N/A
AFUA_3G00820	putative exported protein		38.6114	5.28224	7.30966		Putative exported protein	GO:0008152	metabolic process	BP	IEA	0.0026803	0.41559	AFUA_3G00820	#N/A	#N/A	#N/A	#N/A	#N/A	#N/A
AFUA_8G05120	conserved hypothetical protein		60.6126	8.29213	7.30966		Uncharacterized protein	GO:0005575	cellular_component	CC	ND	3.3105e-7	9.3467e-05	AFUA_8G05120	#N/A	#N/A	#N/A	#N/A	#N/A	#N/A
AFUA_5G14390	C6 transcription factor, putative		52.9237	7.24024	7.30966		#N/A	#N/A	#N/A	#N/A	#N/A	#N/A	#N/A	AFUA_5G14390	#N/A	#N/A	#N/A	#N/A	#N/A	#N/A
AFUA_6G07480	endoglucanase, putative		52.3203	7.1577	7.30966		Endoglucanase, putative (EC 3.2.1.4)	GO:0005575	cellular_component	CC	ND	3.3105e-7	9.3467e-05	AFUA_6G07480	Endoglucanase, putative (EC 3.2.1.4)	1.05	C-compound and carbohydrate metabolism	Metabolism	2.515e-06	0.0010864
AFUA_2G13060	calcineurin binding protein, putative		359.629	49.4228	7.27658		#N/A	#N/A	#N/A	#N/A	#N/A	#N/A	#N/A	AFUA_2G13060	#N/A	#N/A	#N/A	#N/A	#N/A	#N/A
AFUA_5G01630	MFS multidrug transporter, putative		91.9897	12.6913	7.24823		#N/A	#N/A	#N/A	#N/A	#N/A	#N/A	#N/A	AFUA_5G01630	MFS multidrug transporter, putative	32.07	detoxification	Cell rescue, defense and virulence	8.7992e-06	0.0014049
AFUA_6G11880	conserved hypothetical protein		164.035	22.8897	7.16633		Uncharacterized protein	GO:0005575	cellular_component	CC	ND	3.3105e-7	9.3467e-05	AFUA_6G11880	#N/A	#N/A	#N/A	#N/A	#N/A	#N/A
AFUA_5G03300	hypothetical protein		387.231	54.0348	7.16633		Uncharacterized protein	GO:0005575	cellular_component	CC	ND	3.3105e-7	9.3467e-05	AFUA_5G03300	#N/A	#N/A	#N/A	#N/A	#N/A	#N/A
AFUA_1G14880	N-acylethanolamine amidohydrolase, putative		37.7334	5.26537	7.16633		N-acylethanolamine amidohydrolase, putative (EC 3.5.1.4)	GO:0005575	cellular_component	CC	ND	3.3105e-7	9.3467e-05	AFUA_1G14880	N-acylethanolamine amidohydrolase, putative (EC 3.5.1.4)	1.02	nitrogen, sulfur and selenium metabolism	Metabolism	0.011195	0.25186
AFUA_1G05220	selenoprotein domain protein		148.56	20.7303	7.16633		Selenoprotein domain protein	GO:0005575	cellular_component	CC	ND	3.3105e-7	9.3467e-05	AFUA_1G05220	#N/A	#N/A	#N/A	#N/A	#N/A	#N/A
AFUA_5G08360	AI-BP family protein		105.451	14.7148	7.16633		NAD(P)H-hydrate epimerase (EC 5.1.99.6) (NAD(P)HX epimerase)	GO:0008152	metabolic process	BP	IEA	0.0026803	0.41559	AFUA_5G08360	NAD(P)H-hydrate epimerase (EC 5.1.99.6) (NAD(P)HX epimerase)	20.01.13	lipid/fatty acid transport	Cellular transport, transport facilitation and transport routes	0.048237	0.48136
AFUA_8G04780	peroxisomal membrane protein (PmpP24), putative		113.02	15.7709	7.16633		Peroxisomal membrane protein (PmpP24), putative	GO:0005575	cellular_component	CC	ND	3.3105e-7	9.3467e-05	AFUA_8G04780	#N/A	#N/A	#N/A	#N/A	#N/A	#N/A
AFUA_3G14260	mismatched base pair and cruciform DNA recognition protein, putative		1050.41	147.313	7.1305		Mismatched base pair and cruciform DNA recognition protein, putative	GO:0005575	cellular_component	CC	ND	3.3105e-7	9.3467e-05	AFUA_3G14260	#N/A	#N/A	#N/A	#N/A	#N/A	#N/A
AFUA_2G15490	TPR domain protein		110.763	15.6122	7.09467		#N/A	#N/A	#N/A	#N/A	#N/A	#N/A	#N/A	AFUA_2G15490	#N/A	#N/A	#N/A	#N/A	#N/A	#N/A
AFUA_7G02390	hypothetical protein		80.7768	11.3856	7.09467		Uncharacterized protein	GO:0005575	cellular_component	CC	ND	3.3105e-7	9.3467e-05	AFUA_7G02390	#N/A	#N/A	#N/A	#N/A	#N/A	#N/A
AFUA_2G08740	ZIP metal ion transporter, putative		167.065	23.7442	7.03604		#N/A	#N/A	#N/A	#N/A	#N/A	#N/A	#N/A	AFUA_2G08740	ZIP metal ion transporter, putative	34.01.01.01	homeostasis of metal ions (Na, K, Ca etc.)	Interaction with the environment	0.0011954	0.067524
AFUA_1G05830	TBP associated factor (Mot1), putative		150.815	21.4863	7.01913		#N/A	#N/A	#N/A	#N/A	#N/A	#N/A	#N/A	AFUA_1G05830	#N/A	#N/A	#N/A	#N/A	#N/A	#N/A
AFUA_3G14250	Indoleamine 2,3-dioxygenase subfamily		216.29	30.8873	7.00253		Indoleamine 2,3-dioxygenase subfamily	GO:0055114	oxidation-reduction process	BP	IEA	7.8355e-8	6.6367e-05	AFUA_3G14250	Indoleamine 2,3-dioxygenase subfamily	16.21.01	heme binding	Protein with binding function or cofactor requirement (structural or analytic)	0.013841	0.25499
AFUA_4G05900	conserved hypothetical protein		2020.23	289.133	6.98717		#N/A	#N/A	#N/A	#N/A	#N/A	#N/A	#N/A	AFUA_4G05900	#N/A	#N/A	#N/A	#N/A	#N/A	#N/A
AFUA_3G10410	conserved serine-rich protein		163.432	23.7558	6.87968		Conserved serine-rich protein	GO:0005575	cellular_component	CC	ND	3.3105e-7	9.3467e-05	AFUA_3G10410	#N/A	#N/A	#N/A	#N/A	#N/A	#N/A
AFUA_5G01460	C6 finger domain protein, putative		15.7147	2.28421	6.87968		#N/A	#N/A	#N/A	#N/A	#N/A	#N/A	#N/A	AFUA_5G01460	#N/A	#N/A	#N/A	#N/A	#N/A	#N/A
AFUA_6G11210	3-oxoacyl-(acyl-carrier-protein) reductase		23.3295	3.39107	6.87968		3-oxoacyl-(Acyl-carrier-protein) reductase (EC 1.1.1.100)	GO:0055114	oxidation-reduction process	BP	IEA	7.8355e-8	6.6367e-05	AFUA_6G11210	3-oxoacyl-(Acyl-carrier-protein) reductase (EC 1.1.1.100)	1.05	C-compound and carbohydrate metabolism	Metabolism	2.515e-06	0.0010864
AFUA_3G00960	conserved hypothetical protein		88.4064	12.8504	6.87968		#N/A	#N/A	#N/A	#N/A	#N/A	#N/A	#N/A	AFUA_3G00960	#N/A	#N/A	#N/A	#N/A	#N/A	#N/A
AFUA_2G12780	von Willebrand domain protein		15.9636	2.32039	6.87968		von Willebrand domain protein	GO:0005575	cellular_component	CC	ND	3.3105e-7	9.3467e-05	AFUA_2G12780	von Willebrand domain protein	30.05.02.26	integrin receptor signalling pathway	Cellular communication / signal transduction mechanism	0.0014273	0.068367
AFUA_7G05400	conserved hypothetical protein		41.646	6.05348	6.87968		Uncharacterized protein	GO:0005575	cellular_component	CC	ND	3.3105e-7	9.3467e-05	AFUA_7G05400	#N/A	#N/A	#N/A	#N/A	#N/A	#N/A
AFUA_2G11830	conserved hypothetical protein		113.155	16.4477	6.87968		Uncharacterized protein	GO:0005575	cellular_component	CC	ND	3.3105e-7	9.3467e-05	AFUA_2G11830	#N/A	#N/A	#N/A	#N/A	#N/A	#N/A
AFUA_3G01410	polyketide synthase, putative		2.95148	0.429015	6.87968		Polyketide synthase, putative	GO:0005575	cellular_component	CC	ND	3.3105e-7	9.3467e-05	AFUA_3G01410	#N/A	#N/A	#N/A	#N/A	#N/A	#N/A
AFUA_4G07310	cytidylyltransferase family protein		26.0647	3.78864	6.87968		#N/A	#N/A	#N/A	#N/A	#N/A	#N/A	#N/A	AFUA_4G07310	#N/A	#N/A	#N/A	#N/A	#N/A	#N/A
AFUA_5G13830	alpha-galactosidase, putative		42.5446	6.18409	6.87968		Probable alpha-galactosidase A (EC 3.2.1.22) (Melibiase A)	GO:0005575	cellular_component	CC	ND	3.3105e-7	9.3467e-05	AFUA_5G13830	Probable alpha-galactosidase A (EC 3.2.1.22) (Melibiase A)	1.05	C-compound and carbohydrate metabolism	Metabolism	2.515e-06	0.0010864
AFUA_7G03770	hypothetical protein		27.0923	3.93802	6.87968		Uncharacterized protein	GO:0005575	cellular_component	CC	ND	3.3105e-7	9.3467e-05	AFUA_7G03770	#N/A	#N/A	#N/A	#N/A	#N/A	#N/A
AFUA_8G05130	conserved hypothetical protein		40.8581	5.93896	6.87968		Uncharacterized protein	GO:0005575	cellular_component	CC	ND	3.3105e-7	9.3467e-05	AFUA_8G05130	#N/A	#N/A	#N/A	#N/A	#N/A	#N/A
AFUA_6G13860	conserved hypothetical protein		64.0572	9.31107	6.87968		Uncharacterized protein	GO:0005575	cellular_component	CC	ND	3.3105e-7	9.3467e-05	AFUA_6G13860	#N/A	#N/A	#N/A	#N/A	#N/A	#N/A
AFUA_1G13350	MFS transporter, putative		25.9305	3.76915	6.87968		MFS transporter, putative	GO:0005575	cellular_component	CC	ND	3.3105e-7	9.3467e-05	AFUA_1G13350	#N/A	#N/A	#N/A	#N/A	#N/A	#N/A
AFUA_3G11220	ribonuclease T2 family, putative		18.4811	2.68632	6.87968		Ribonuclease T2-like (RNase T2-like) (EC 3.1.27.1)	GO:0005575	cellular_component	CC	ND	3.3105e-7	9.3467e-05	AFUA_3G11220	#N/A	#N/A	#N/A	#N/A	#N/A	#N/A
AFUA_2G15850	phytanoyl-CoA dioxygenase family protein		23.996	3.48796	6.87968		Phytanoyl-CoA dioxygenase family protein	GO:0055114	oxidation-reduction process	BP	IEA	7.8355e-8	6.6367e-05	AFUA_2G15850	#N/A	#N/A	#N/A	#N/A	#N/A	#N/A
AFUA_3G13090	conserved hypothetical protein		20.7658	3.01843	6.87968		Uncharacterized protein	GO:0005575	cellular_component	CC	ND	3.3105e-7	9.3467e-05	AFUA_3G13090	#N/A	#N/A	#N/A	#N/A	#N/A	#N/A
AFUA_3G03445	short-chain alcohol dehydrogenase, putative		61.957	9.00579	6.87968		Short-chain alcohol dehydrogenase, putative	GO:0055114	oxidation-reduction process	BP	IEA	7.8355e-8	6.6367e-05	AFUA_3G03445	#N/A	#N/A	#N/A	#N/A	#N/A	#N/A
AFUA_4G12350	conserved hypothetical protein		15.1175	2.19741	6.87968		#N/A	#N/A	#N/A	#N/A	#N/A	#N/A	#N/A	AFUA_4G12350	#N/A	#N/A	#N/A	#N/A	#N/A	#N/A
AFUA_1G09754	DUF636 domain protein		46.0899	6.69943	6.87968		DUF636 domain protein	GO:0005575	cellular_component	CC	ND	3.3105e-7	9.3467e-05	AFUA_1G09754	#N/A	#N/A	#N/A	#N/A	#N/A	#N/A
AFUA_3G07720	conserved hypothetical protein		53.9911	7.84791	6.87968		Uncharacterized protein	GO:0005575	cellular_component	CC	ND	3.3105e-7	9.3467e-05	AFUA_3G07720	#N/A	#N/A	#N/A	#N/A	#N/A	#N/A
AFUA_1G02120	F-box domain protein		10.6611	1.54966	6.87968		F-box domain protein	GO:0005575	cellular_component	CC	ND	3.3105e-7	9.3467e-05	AFUA_1G02120	#N/A	#N/A	#N/A	#N/A	#N/A	#N/A
AFUA_3G14460	Rad51 family DNA repair protein, putative		16.5399	2.40417	6.87968		Rad51 family DNA repair protein, putative	GO:0005575	cellular_component	CC	ND	3.3105e-7	9.3467e-05	AFUA_3G14460	#N/A	#N/A	#N/A	#N/A	#N/A	#N/A
AFUA_5G10880	SNF2 family helicase, putative		6.47153	0.940674	6.87968		SNF2 family helicase, putative	GO:0005575	cellular_component	CC	ND	3.3105e-7	9.3467e-05	AFUA_5G10880	#N/A	#N/A	#N/A	#N/A	#N/A	#N/A
AFUA_5G12950	MFS quinate transporter, putative		27.5364	4.00257	6.87968		#N/A	#N/A	#N/A	#N/A	#N/A	#N/A	#N/A	AFUA_5G12950	#N/A	#N/A	#N/A	#N/A	#N/A	#N/A
AFUA_6G10930	extracellular protein, putative		10.7216	1.55845	6.87968		Extracellular protein, putative (EC 2.7.7.6)	GO:0005575	cellular_component	CC	ND	3.3105e-7	9.3467e-05	AFUA_6G10930	#N/A	#N/A	#N/A	#N/A	#N/A	#N/A
AFUA_5G07090	conserved hypothetical protein		193.856	28.4148	6.82235		Uncharacterized protein	GO:0005575	cellular_component	CC	ND	3.3105e-7	9.3467e-05	AFUA_5G07090	#N/A	#N/A	#N/A	#N/A	#N/A	#N/A
AFUA_4G03585	alpha-galactosidase, putative		123.797	18.2015	6.8015		Probable alpha-galactosidase D (EC 3.2.1.22) (Melibiase D)	GO:0005575	cellular_component	CC	ND	3.3105e-7	9.3467e-05	AFUA_4G03585	Probable alpha-galactosidase D (EC 3.2.1.22) (Melibiase D)	1.05	C-compound and carbohydrate metabolism	Metabolism	2.515e-06	0.0010864
AFUA_6G02020	G1/S-specific cyclin Pcl5, putative		569.863	84.3957	6.75228		G1/S-specific cyclin Pcl5, putative	GO:0005575	cellular_component	CC	ND	3.3105e-7	9.3467e-05	AFUA_6G02020	#N/A	#N/A	#N/A	#N/A	#N/A	#N/A
AFUA_6G02720	FMN dependent dehydrogenase, putative		91.2102	13.5979	6.70769		FMN dependent dehydrogenase, putative (EC 1.13.-.-)	GO:0055114	oxidation-reduction process	BP	IEA	7.8355e-8	6.6367e-05	AFUA_6G02720	FMN dependent dehydrogenase, putative (EC 1.13.-.-)	1.05	C-compound and carbohydrate metabolism	Metabolism	2.515e-06	0.0010864
AFUA_3G13810	integral membrane protein, putative		209.965	31.3022	6.70769		Integral membrane protein, putative	GO:0005575	cellular_component	CC	ND	3.3105e-7	9.3467e-05	AFUA_3G13810	#N/A	#N/A	#N/A	#N/A	#N/A	#N/A
AFUA_6G00510	NADP-dependent alcohol dehydrogenase		896.897	134.469	6.66993		NADP-dependent alcohol dehydrogenase (EC 1.1.1.1)	GO:0055114	oxidation-reduction process	BP	IEA	7.8355e-8	6.6367e-05	AFUA_6G00510	NADP-dependent alcohol dehydrogenase (EC 1.1.1.1)	1.05	C-compound and carbohydrate metabolism	Metabolism	2.515e-06	0.0010864
AFUA_8G06020	glutamate decarboxylase		58.3469	8.75464	6.66469		Glutamate decarboxylase (EC 4.1.1.15)	GO:0005575	cellular_component	CC	ND	3.3105e-7	9.3467e-05	AFUA_8G06020	#N/A	#N/A	#N/A	#N/A	#N/A	#N/A
AFUA_1G11180	heat shock protein/chaperonin HSP78, putative		576.615	86.74	6.64763		Heat shock protein/chaperonin HSP78, putative	GO:0005575	cellular_component	CC	ND	3.3105e-7	9.3467e-05	AFUA_1G11180	#N/A	#N/A	#N/A	#N/A	#N/A	#N/A
AFUA_2G01250	serine peptidase, putative		247.887	37.5983	6.59303		Serine peptidase, putative (EC 3.4.-.-)	GO:0005575	cellular_component	CC	ND	3.3105e-7	9.3467e-05	AFUA_2G01250	Serine peptidase, putative (EC 3.4.-.-)	14.13.04	lysosomal and vacuolar protein degradation	Protein fate (folding, modification, destination)	0.0071082	0.2128
AFUA_3G00150	short-chain dehydrogenase/oxidoreductase, putative		162.175	24.5979	6.59303		Short-chain dehydrogenase/oxidoreductase, putative	GO:0055114	oxidation-reduction process	BP	IEA	7.8355e-8	6.6367e-05	AFUA_3G00150	Short-chain dehydrogenase/oxidoreductase, putative	1.05	C-compound and carbohydrate metabolism	Metabolism	2.515e-06	0.0010864
AFUA_6G03790	conserved hypothetical protein		310.449	47.0874	6.59303		Uncharacterized protein	GO:0005575	cellular_component	CC	ND	3.3105e-7	9.3467e-05	AFUA_6G03790	#N/A	#N/A	#N/A	#N/A	#N/A	#N/A
AFUA_7G05730	conserved hypothetical protein		1980.54	302.849	6.5397		Uncharacterized protein	GO:0005575	cellular_component	CC	ND	3.3105e-7	9.3467e-05	AFUA_7G05730	#N/A	#N/A	#N/A	#N/A	#N/A	#N/A
AFUA_1G12460	oxidoreductase CipA-like, putative		120.08	18.373	6.5357		Oxidoreductase CipA-like, putative (EC 1.3.1.-)	GO:0055114	oxidation-reduction process	BP	IEA	7.8355e-8	6.6367e-05	AFUA_1G12460	Oxidoreductase CipA-like, putative (EC 1.3.1.-)	1.05	C-compound and carbohydrate metabolism	Metabolism	2.515e-06	0.0010864
AFUA_2G15970	phosphatidylethanolamine methyltransferase		38.8993	5.95182	6.5357		#N/A	#N/A	#N/A	#N/A	#N/A	#N/A	#N/A	AFUA_2G15970	Phosphatidylethanolamine N-methyltransferase (PEAMT) (EC 2.1.1.17)	1.06	lipid, fatty acid and isoprenoid metabolism	Metabolism	4.5362e-06	0.0010864
AFUA_3G00130	conserved hypothetical protein		39.2759	6.03212	6.51113		Uncharacterized protein	GO:0005575	cellular_component	CC	ND	3.3105e-7	9.3467e-05	AFUA_3G00130	#N/A	#N/A	#N/A	#N/A	#N/A	#N/A
AFUA_7G05580	phospholipase PldA, putative		178.232	27.4677	6.48879		Phospholipase PldA, putative	GO:0005575	cellular_component	CC	ND	3.3105e-7	9.3467e-05	AFUA_7G05580	Phospholipase PldA, putative	1.06	lipid, fatty acid and isoprenoid metabolism	Metabolism	4.5362e-06	0.0010864
AFUA_8G06340	conserved hypothetical protein		127.682	19.7965	6.4497		Uncharacterized protein	GO:0005575	cellular_component	CC	ND	3.3105e-7	9.3467e-05	AFUA_8G06340	#N/A	#N/A	#N/A	#N/A	#N/A	#N/A
AFUA_6G12450	chaperone/heat shock protein Hsp12, putative		141.727	21.9741	6.4497		Chaperone/heat shock protein Hsp12, putative	GO:0005575	cellular_component	CC	ND	3.3105e-7	9.3467e-05	AFUA_6G12450	#N/A	#N/A	#N/A	#N/A	#N/A	#N/A
AFUA_3G15000	DUF895 domain membrane protein		30.4134	4.71548	6.4497		DUF895 domain membrane protein	GO:0005575	cellular_component	CC	ND	3.3105e-7	9.3467e-05	AFUA_3G15000	#N/A	#N/A	#N/A	#N/A	#N/A	#N/A
AFUA_5G01700	C6 transcription factor, putative		21.3766	3.31435	6.4497		#N/A	#N/A	#N/A	#N/A	#N/A	#N/A	#N/A	AFUA_5G01700	#N/A	#N/A	#N/A	#N/A	#N/A	#N/A
AFUA_1G14520	pyridine nucleotide-disulphide oxidoreductase, putative		51.9145	8.04913	6.4497		Pyridine nucleotide-disulphide oxidoreductase, putative (EC 1.6.99.3)	GO:0055114	oxidation-reduction process	BP	IEA	7.8355e-8	6.6367e-05	AFUA_1G14520	Pyridine nucleotide-disulphide oxidoreductase, putative (EC 1.6.99.3)	02.16.01	alcohol fermentation	Energy	0.0023361	0.078984
AFUA_2G12950	hypothetical protein		126.542	19.6198	6.4497		Uncharacterized protein	GO:0005575	cellular_component	CC	ND	3.3105e-7	9.3467e-05	AFUA_2G12950	#N/A	#N/A	#N/A	#N/A	#N/A	#N/A
AFUA_7G03850	oxidoreductase, 2-nitropropane dioxygenase family, putative		113.989	17.6736	6.4497		Oxidoreductase, 2-nitropropane dioxygenase family, putative	GO:0055114	oxidation-reduction process	BP	IEA	7.8355e-8	6.6367e-05	AFUA_7G03850	Oxidoreductase, 2-nitropropane dioxygenase family, putative	16.21.05	FAD/FMN binding	Protein with binding function or cofactor requirement (structural or analytic)	0.0093456	0.22383
AFUA_8G05810	DUF1295 domain protein		144.082	22.5541	6.38827		DUF1295 domain protein	GO:0005575	cellular_component	CC	ND	3.3105e-7	9.3467e-05	AFUA_8G05810	#N/A	#N/A	#N/A	#N/A	#N/A	#N/A
AFUA_2G09510	conserved hypothetical protein		883.667	138.326	6.38827		Uncharacterized protein	GO:0005575	cellular_component	CC	ND	3.3105e-7	9.3467e-05	AFUA_2G09510	#N/A	#N/A	#N/A	#N/A	#N/A	#N/A
AFUA_2G17730	MFS multidrug transporter, putative		258.685	40.5348	6.38181		#N/A	#N/A	#N/A	#N/A	#N/A	#N/A	#N/A	AFUA_2G17730	MFS multidrug transporter, putative	20.09.16	cellular export and secretion	Cellular transport, transport facilitation and transport routes	0.00089546	0.066362
AFUA_1G10370	MFS multidrug transporter, putative		150.163	23.5437	6.37804		#N/A	#N/A	#N/A	#N/A	#N/A	#N/A	#N/A	AFUA_1G10370	MFS multidrug transporter, putative	32.07	detoxification	Cell rescue, defense and virulence	8.7992e-06	0.0014049
AFUA_8G06870	MFS sugar transporter, putative		51.4863	8.09062	6.3637		#N/A	#N/A	#N/A	#N/A	#N/A	#N/A	#N/A	AFUA_8G06870	MFS sugar transporter, putative	1.05	C-compound and carbohydrate metabolism	Metabolism	2.515e-06	0.0010864
AFUA_2G04190	conserved hypothetical protein		99.0346	15.5624	6.3637		Uncharacterized protein	GO:0005575	cellular_component	CC	ND	3.3105e-7	9.3467e-05	AFUA_2G04190	#N/A	#N/A	#N/A	#N/A	#N/A	#N/A
AFUA_6G02180	GNAT family acetyltransferase, putative		54.4151	8.62859	6.30637		GNAT family acetyltransferase, putative	GO:0005575	cellular_component	CC	ND	3.3105e-7	9.3467e-05	AFUA_6G02180	#N/A	#N/A	#N/A	#N/A	#N/A	#N/A
AFUA_3G00650	aminopeptidase Y, putative		41.4075	6.56598	6.30637		Probable leucine aminopeptidase 2 (EC 3.4.11.-) (Leucyl aminopeptidase 2) (LAP2)	GO:0005575	cellular_component	CC	ND	3.3105e-7	9.3467e-05	AFUA_3G00650	Probable leucine aminopeptidase 2 (EC 3.4.11.-) (Leucyl aminopeptidase 2) (LAP2)	14.13.04.02	vacuolar protein degradation	Protein fate (folding, modification, destination)	0.00096981	0.066362
AFUA_3G13140	methyltransferase, putative		540.291	86.6586	6.23471		#N/A	#N/A	#N/A	#N/A	#N/A	#N/A	#N/A	AFUA_3G13140	Methyltransferase, putative	1.2	secondary metabolism	Metabolism	0.0024405	0.078984
AFUA_2G03890	Protein phosphatase 2C, putative		84.8312	13.6063	6.23471		Protein phosphatase 2C, putative	GO:0005575	cellular_component	CC	ND	3.3105e-7	9.3467e-05	AFUA_2G03890	Protein phosphatase 2C, putative	30.05.02.26	integrin receptor signalling pathway	Cellular communication / signal transduction mechanism	0.0014273	0.068367
AFUA_2G05730	siderochrome-iron transporter MirC		100.351	16.1575	6.21082		#N/A	#N/A	#N/A	#N/A	#N/A	#N/A	#N/A	AFUA_2G05730	Siderochrome-iron transporter MirC	34.01.01.01	homeostasis of metal ions (Na, K, Ca etc.)	Interaction with the environment	0.0011954	0.067524
AFUA_5G06210	sucrose transporter, putative		97.0219	15.6214	6.21082		#N/A	#N/A	#N/A	#N/A	#N/A	#N/A	#N/A	AFUA_5G06210	#N/A	#N/A	#N/A	#N/A	#N/A	#N/A
AFUA_1G03720	UPF0136 domain protein		427.854	69.1011	6.19171		#N/A	#N/A	#N/A	#N/A	#N/A	#N/A	#N/A	AFUA_1G03720	#N/A	#N/A	#N/A	#N/A	#N/A	#N/A
AFUA_2G13690	ubiquitin conjugating enzyme, putative		299.001	48.6769	6.14257		Ubiquitin conjugating enzyme, putative (EC 6.3.2.19)	GO:0005575	cellular_component	CC	ND	3.3105e-7	9.3467e-05	AFUA_2G13690	Ubiquitin conjugating enzyme, putative (EC 6.3.2.19)	43.01.03.09	development of asco- basidio- or zygospore	Cell type differentiation	0.035951	0.41473
AFUA_5G03760	class III chitinase ChiA1		82.8997	13.5948	6.0979		Endochitinase A1 (EC 3.2.1.14) (Chitinase A1)	GO:0005575	cellular_component	CC	ND	3.3105e-7	9.3467e-05	AFUA_5G03760	Endochitinase A1 (EC 3.2.1.14) (Chitinase A1)	1.05	C-compound and carbohydrate metabolism	Metabolism	2.515e-06	0.0010864
AFUA_5G13580	3-ketosteroid-delta-1-dehydrogenase, putative		11.6442	1.93434	6.01972		3-ketosteroid-delta-1-dehydrogenase, putative	GO:0055114	oxidation-reduction process	BP	IEA	7.8355e-8	6.6367e-05	AFUA_5G13580	3-ketosteroid-delta-1-dehydrogenase, putative	1.05	C-compound and carbohydrate metabolism	Metabolism	2.515e-06	0.0010864
AFUA_4G10290	conserved hypothetical protein		80.6574	13.3989	6.01972		Uncharacterized protein	GO:0005575	cellular_component	CC	ND	3.3105e-7	9.3467e-05	AFUA_4G10290	#N/A	#N/A	#N/A	#N/A	#N/A	#N/A
AFUA_5G07650	F-box domain and ankyrin repeat protein		29.6588	4.92694	6.01972		F-box domain and ankyrin repeat protein	GO:0005575	cellular_component	CC	ND	3.3105e-7	9.3467e-05	AFUA_5G07650	#N/A	#N/A	#N/A	#N/A	#N/A	#N/A
AFUA_4G06085	conserved hypothetical protein		15.1695	2.51997	6.01972		Uncharacterized protein	GO:0005575	cellular_component	CC	ND	3.3105e-7	9.3467e-05	AFUA_4G06085	#N/A	#N/A	#N/A	#N/A	#N/A	#N/A
AFUA_5G07660	conserved hypothetical protein		7.43971	1.23589	6.01972		Uncharacterized protein	GO:0005575	cellular_component	CC	ND	3.3105e-7	9.3467e-05	AFUA_5G07660	#N/A	#N/A	#N/A	#N/A	#N/A	#N/A
AFUA_2G00330	beta-alanine synthase, putative		28.8817	4.79785	6.01972		Beta-alanine synthase, putative (EC 3.5.1.-)	GO:0005575	cellular_component	CC	ND	3.3105e-7	9.3467e-05	AFUA_2G00330	#N/A	#N/A	#N/A	#N/A	#N/A	#N/A
AFUA_3G08920	#N/A		6.59412	1.09542	6.01972		Uncharacterized protein	GO:0005575	cellular_component	CC	ND	3.3105e-7	9.3467e-05	AFUA_3G08920	#N/A	#N/A	#N/A	#N/A	#N/A	#N/A
AFUA_6G13080	DEAD/DEAH box DNA helicase (Mer3), putative		13.779	2.28897	6.01972		DEAD/DEAH box DNA helicase (Mer3), putative (EC 3.6.1.-)	GO:0008152	metabolic process	BP	IEA	0.0026803	0.41559	AFUA_6G13080	#N/A	#N/A	#N/A	#N/A	#N/A	#N/A
AFUA_2G14100	kinase activator (Atg17), putative		47.9269	7.96164	6.01972		Autophagy-related protein 17	GO:0005575	cellular_component	CC	ND	3.3105e-7	9.3467e-05	AFUA_2G14100	#N/A	#N/A	#N/A	#N/A	#N/A	#N/A
AFUA_7G04760	gamma-glutamyltranspeptidase		26.8313	4.45723	6.01972		#N/A	#N/A	#N/A	#N/A	#N/A	#N/A	#N/A	AFUA_7G04760	Gamma-glutamyltranspeptidase (EC 2.3.2.2)	1.06	lipid, fatty acid and isoprenoid metabolism	Metabolism	4.5362e-06	0.0010864
AFUA_1G04450	siderophore biosynthesis protein, putative		177.28	29.4499	6.01972		#N/A	#N/A	#N/A	#N/A	#N/A	#N/A	#N/A	AFUA_1G04450	Siderophore biosynthesis protein, putative	1.05	C-compound and carbohydrate metabolism	Metabolism	2.515e-06	0.0010864
AFUA_8G00790	conserved hypothetical protein		84.2536	13.9963	6.01972		Uncharacterized protein	GO:0005575	cellular_component	CC	ND	3.3105e-7	9.3467e-05	AFUA_8G00790	#N/A	#N/A	#N/A	#N/A	#N/A	#N/A
AFUA_2G00940	hypothetical protein		22.7673	3.78212	6.01972		Uncharacterized protein	GO:0005575	cellular_component	CC	ND	3.3105e-7	9.3467e-05	AFUA_2G00940	#N/A	#N/A	#N/A	#N/A	#N/A	#N/A
AFUA_3G09110	conserved hypothetical protein		182.453	30.3092	6.01972		#N/A	#N/A	#N/A	#N/A	#N/A	#N/A	#N/A	AFUA_3G09110	#N/A	#N/A	#N/A	#N/A	#N/A	#N/A
AFUA_3G10690	calcium-translocating P-type ATPase(PMCA-type),putative		21.9914	3.65322	6.01972		Calcium-transporting ATPase (EC 3.6.3.8)	GO:0008152	metabolic process	BP	IEA	0.0026803	0.41559	AFUA_3G10690	Calcium-transporting ATPase (EC 3.6.3.8)	34.01.01.01	homeostasis of metal ions (Na, K, Ca etc.)	Interaction with the environment	0.0011954	0.067524
AFUA_1G11390	cytochrome P450, putative		11.9817	1.99041	6.01972		Cytochrome P450, putative (EC 1.14.99.9)	GO:0055114	oxidation-reduction process	BP	IEA	7.8355e-8	6.6367e-05	AFUA_1G11390	Cytochrome P450, putative (EC 1.14.99.9)	1.2	secondary metabolism	Metabolism	0.0024405	0.078984
AFUA_1G16310	glucose-inducible SAM-dependent methyltransferase Rrg1, putative		19.1707	3.18466	6.01972		#N/A	#N/A	#N/A	#N/A	#N/A	#N/A	#N/A	AFUA_1G16310	#N/A	#N/A	#N/A	#N/A	#N/A	#N/A
AFUA_1G16556	phosphatase, putative		32.905	5.4662	6.01972		ADP-ribose 1''-phosphate phosphatase (EC 3.1.3.84)	GO:0005575	cellular_component	CC	ND	3.3105e-7	9.3467e-05	AFUA_1G16556	#N/A	#N/A	#N/A	#N/A	#N/A	#N/A
AFUA_4G01150	N,N-dimethylglycine oxidase		14.8627	2.469	6.01972		N,N-dimethylglycine oxidase (EC 1.5.8.3)	GO:0055114	oxidation-reduction process	BP	IEA	7.8355e-8	6.6367e-05	AFUA_4G01150	N,N-dimethylglycine oxidase (EC 1.5.8.3)	16.21.05	FAD/FMN binding	Protein with binding function or cofactor requirement (structural or analytic)	0.0093456	0.22383
AFUA_4G06200	flavin-binding monooxygenase, putative		10.5317	1.74953	6.01972		Flavin-binding monooxygenase, putative	GO:0055114	oxidation-reduction process	BP	IEA	7.8355e-8	6.6367e-05	AFUA_4G06200	Flavin-binding monooxygenase, putative	1.06	lipid, fatty acid and isoprenoid metabolism	Metabolism	4.5362e-06	0.0010864
AFUA_5G09150	oxidoreductase, short-chain dehydrogenase/reductase family		65.81	10.9324	6.01972		Oxidoreductase, short-chain dehydrogenase/reductase family (EC 1.1.1.100)	GO:0055114	oxidation-reduction process	BP	IEA	7.8355e-8	6.6367e-05	AFUA_5G09150	Oxidoreductase, short-chain dehydrogenase/reductase family (EC 1.1.1.100)	1.05	C-compound and carbohydrate metabolism	Metabolism	2.515e-06	0.0010864
AFUA_8G05950	conserved hypothetical protein		29.6588	4.92694	6.01972		Uncharacterized protein	GO:0005575	cellular_component	CC	ND	3.3105e-7	9.3467e-05	AFUA_8G05950	#N/A	#N/A	#N/A	#N/A	#N/A	#N/A
AFUA_4G07040	aspartic-type endopeptidase (CtsD), putative		13.924	2.31307	6.01972		Aspartic-type endopeptidase ctsD (EC 3.4.23.-)	GO:0005575	cellular_component	CC	ND	3.3105e-7	9.3467e-05	AFUA_4G07040	Aspartic-type endopeptidase ctsD (EC 3.4.23.-)	14.13.04.02	vacuolar protein degradation	Protein fate (folding, modification, destination)	0.00096981	0.066362
AFUA_3G06800	conserved hypothetical protein		6.55491	1.08891	6.01972		Uncharacterized protein	GO:0005575	cellular_component	CC	ND	3.3105e-7	9.3467e-05	AFUA_3G06800	#N/A	#N/A	#N/A	#N/A	#N/A	#N/A
AFUA_1G03090	mitochondrial integral membrane protein		270.211	45.7794	5.90245		#N/A	#N/A	#N/A	#N/A	#N/A	#N/A	#N/A	AFUA_1G03090	#N/A	#N/A	#N/A	#N/A	#N/A	#N/A
AFUA_5G03860	alkaline phosphatase family protein		68.612	11.6353	5.89687		Alkaline phosphatase family protein (EC 3.1.-.-)	GO:0005575	cellular_component	CC	ND	3.3105e-7	9.3467e-05	AFUA_5G03860	#N/A	#N/A	#N/A	#N/A	#N/A	#N/A
AFUA_1G01600	deoxyribodipyrimidine photo-lyase Phr1, putative		1231.36	209.634	5.87383		#N/A	#N/A	#N/A	#N/A	#N/A	#N/A	#N/A	AFUA_1G01600	Deoxyribodipyrimidine photo-lyase Phr1, putative (EC 4.1.99.3)	16.21.05	FAD/FMN binding	Protein with binding function or cofactor requirement (structural or analytic)	0.0093456	0.22383
AFUA_8G04890	conserved hypothetical protein		181.495	31.0369	5.84773		Uncharacterized protein	GO:0005575	cellular_component	CC	ND	3.3105e-7	9.3467e-05	AFUA_8G04890	#N/A	#N/A	#N/A	#N/A	#N/A	#N/A
AFUA_2G07780	acyl-CoA synthetase, putative		46.829	8.00807	5.84773		Acyl-CoA synthetase, putative (EC 6.2.1.-)	GO:0005575	cellular_component	CC	ND	3.3105e-7	9.3467e-05	AFUA_2G07780	Acyl-CoA synthetase, putative (EC 6.2.1.-)	1.05	C-compound and carbohydrate metabolism	Metabolism	2.515e-06	0.0010864
AFUA_2G01710	GPI anchored protein, putative		87.5332	14.9688	5.84773		GPI anchored protein, putative	GO:0005575	cellular_component	CC	ND	3.3105e-7	9.3467e-05	AFUA_2G01710	#N/A	#N/A	#N/A	#N/A	#N/A	#N/A
AFUA_4G03900	peroxisomal multifunctional beta-oxidation protein (MFP), putative		35.6941	6.10393	5.84773		Peroxisomal multifunctional beta-oxidation protein (MFP), putative	GO:0055114	oxidation-reduction process	BP	IEA	7.8355e-8	6.6367e-05	AFUA_4G03900	Peroxisomal multifunctional beta-oxidation protein (MFP), putative	1.06	lipid, fatty acid and isoprenoid metabolism	Metabolism	4.5362e-06	0.0010864
AFUA_5G10220	alcohol dehydrogenase, zinc-containing, putative		91.5233	15.6511	5.84773		Alcohol dehydrogenase, zinc-containing, putative (EC 1.6.5.5)	GO:0055114	oxidation-reduction process	BP	IEA	7.8355e-8	6.6367e-05	AFUA_5G10220	Alcohol dehydrogenase, zinc-containing, putative (EC 1.6.5.5)	1.05	C-compound and carbohydrate metabolism	Metabolism	2.515e-06	0.0010864
AFUA_4G04000	LysM domain protein, putative		68.0056	11.7779	5.77402		LysM domain protein, putative	GO:0005575	cellular_component	CC	ND	3.3105e-7	9.3467e-05	AFUA_4G04000	#N/A	#N/A	#N/A	#N/A	#N/A	#N/A
AFUA_1G05240	PHD finger and BAH domain protein (Snt2), putative		116.014	20.1062	5.77005		#N/A	#N/A	#N/A	#N/A	#N/A	#N/A	#N/A	AFUA_1G05240	#N/A	#N/A	#N/A	#N/A	#N/A	#N/A
AFUA_2G00750	oxidoreductase, 2OG-Fe(II) oxygenase family, putative		51.7723	9.03047	5.73307		Oxidoreductase, 2OG-Fe(II) oxygenase family, putative	GO:0055114	oxidation-reduction process	BP	IEA	7.8355e-8	6.6367e-05	AFUA_2G00750	Oxidoreductase, 2OG-Fe(II) oxygenase family, putative	1.2	secondary metabolism	Metabolism	0.0024405	0.078984
AFUA_1G14910	endosomal SPRY domain protein, putative		172.973	30.2793	5.71259		Protein ssh4	GO:0005575	cellular_component	CC	ND	3.3105e-7	9.3467e-05	AFUA_1G14910	Protein ssh4	30.05.02.26	integrin receptor signalling pathway	Cellular communication / signal transduction mechanism	0.0014273	0.068367
AFUA_2G17475	integral membrane protein		66.4147	11.6574	5.69723		Integral membrane protein	GO:0005575	cellular_component	CC	ND	3.3105e-7	9.3467e-05	AFUA_2G17475	#N/A	#N/A	#N/A	#N/A	#N/A	#N/A
AFUA_3G07640	plasma membrane H+-ATPase Pma1		5063.37	890.963	5.68303		#N/A	#N/A	#N/A	#N/A	#N/A	#N/A	#N/A	AFUA_3G07640	#N/A	#N/A	#N/A	#N/A	#N/A	#N/A
AFUA_5G02700	MFS multidrug transporter, putative		636.323	112.113	5.67574		#N/A	#N/A	#N/A	#N/A	#N/A	#N/A	#N/A	AFUA_5G02700	MFS multidrug transporter, putative	32.07	detoxification	Cell rescue, defense and virulence	8.7992e-06	0.0014049
AFUA_6G00290	aminotransferase, putative		124.179	21.9741	5.65117		Aminotransferase, putative (EC 2.6.1.1)	GO:0005575	cellular_component	CC	ND	3.3105e-7	9.3467e-05	AFUA_6G00290	Aminotransferase, putative (EC 2.6.1.1)	1.02	nitrogen, sulfur and selenium metabolism	Metabolism	0.011195	0.25186
AFUA_2G01790	conserved serine proline-rich protein		49.8427	8.81989	5.65117		Conserved serine proline-rich protein	GO:0005575	cellular_component	CC	ND	3.3105e-7	9.3467e-05	AFUA_2G01790	#N/A	#N/A	#N/A	#N/A	#N/A	#N/A
AFUA_3G07980	conserved hypothetical protein		490.083	87.2804	5.61503		Uncharacterized protein	GO:0005575	cellular_component	CC	ND	3.3105e-7	9.3467e-05	AFUA_3G07980	#N/A	#N/A	#N/A	#N/A	#N/A	#N/A
AFUA_2G15180	conserved hypothetical protein		255.895	45.7794	5.58974		Uncharacterized protein	GO:0055114	oxidation-reduction process	BP	IEA	7.8355e-8	6.6367e-05	AFUA_2G15180	#N/A	#N/A	#N/A	#N/A	#N/A	#N/A
AFUA_6G03320	MFS multidrug transporter, putative		66.275	11.8565	5.58974		#N/A	#N/A	#N/A	#N/A	#N/A	#N/A	#N/A	AFUA_6G03320	MFS multidrug transporter, putative	32.07	detoxification	Cell rescue, defense and virulence	8.7992e-06	0.0014049
AFUA_8G01890	Na+/H+ exchanger family protein, putative		20.3698	3.64414	5.58974		#N/A	#N/A	#N/A	#N/A	#N/A	#N/A	#N/A	AFUA_8G01890	Na+/H+ exchanger family protein, putative	34.01.01.01	homeostasis of metal ions (Na, K, Ca etc.)	Interaction with the environment	0.0011954	0.067524
AFUA_3G08450	hypothetical protein		222.652	39.8323	5.58974		Uncharacterized protein	GO:0005575	cellular_component	CC	ND	3.3105e-7	9.3467e-05	AFUA_3G08450	#N/A	#N/A	#N/A	#N/A	#N/A	#N/A
AFUA_1G11140	Sterol desaturase family		35.4999	6.35091	5.58974		Sterol desaturase family	GO:0055114	oxidation-reduction process	BP	IEA	7.8355e-8	6.6367e-05	AFUA_1G11140	#N/A	#N/A	#N/A	#N/A	#N/A	#N/A
AFUA_5G02190	sulfite oxidase, putative		96.9708	17.348	5.58974		Sulfite oxidase, putative (EC 1.8.3.1)	GO:0055114	oxidation-reduction process	BP	IEA	7.8355e-8	6.6367e-05	AFUA_5G02190	Sulfite oxidase, putative (EC 1.8.3.1)	16.21.03	molybdopterin binding	Protein with binding function or cofactor requirement (structural or analytic)	0.0024107	0.078984
AFUA_5G14780	heat shock trehalose synthase, putative		18.3877	3.28954	5.58974		Heat shock trehalose synthase, putative (EC 2.4.1.-)	GO:0005575	cellular_component	CC	ND	3.3105e-7	9.3467e-05	AFUA_5G14780	Heat shock trehalose synthase, putative (EC 2.4.1.-)	1.05	C-compound and carbohydrate metabolism	Metabolism	2.515e-06	0.0010864
AFUA_6G08020	ABC transporter, putative		24.1316	4.31712	5.58974		#N/A	#N/A	#N/A	#N/A	#N/A	#N/A	#N/A	AFUA_6G08020	ABC transporter, putative	32.07	detoxification	Cell rescue, defense and virulence	8.7992e-06	0.0014049
AFUA_1G13530	conserved hypothetical protein		79.245	14.1769	5.58974		Uncharacterized protein	GO:0005575	cellular_component	CC	ND	3.3105e-7	9.3467e-05	AFUA_1G13530	#N/A	#N/A	#N/A	#N/A	#N/A	#N/A
AFUA_8G00470	conserved hypothetical protein		89.007	15.9233	5.58974		Uncharacterized protein	GO:0005575	cellular_component	CC	ND	3.3105e-7	9.3467e-05	AFUA_8G00470	#N/A	#N/A	#N/A	#N/A	#N/A	#N/A
AFUA_5G03330	HypA-like protein, putative		309.455	55.3612	5.58974		HypA-like protein, putative	GO:0005575	cellular_component	CC	ND	3.3105e-7	9.3467e-05	AFUA_5G03330	#N/A	#N/A	#N/A	#N/A	#N/A	#N/A
AFUA_5G07340	DnaJ domain protein Psi, putative		764.396	136.974	5.58059		#N/A	#N/A	#N/A	#N/A	#N/A	#N/A	#N/A	AFUA_5G07340	#N/A	#N/A	#N/A	#N/A	#N/A	#N/A
AFUA_5G06470	serine/threonine protein kinase, putative		386.992	69.6244	5.55828		Serine/threonine protein kinase, putative	GO:0005575	cellular_component	CC	ND	3.3105e-7	9.3467e-05	AFUA_5G06470	#N/A	#N/A	#N/A	#N/A	#N/A	#N/A
AFUA_4G11260	aldo-keto reductase, putative		465.198	83.999	5.53814		Aldo-keto reductase, putative (EC 1.1.1.-)	GO:0055114	oxidation-reduction process	BP	IEA	7.8355e-8	6.6367e-05	AFUA_4G11260	Aldo-keto reductase, putative (EC 1.1.1.-)	1.05	C-compound and carbohydrate metabolism	Metabolism	2.515e-06	0.0010864
AFUA_1G14300	Fasciclin domain family protein		60.47	10.9871	5.50374		#N/A	#N/A	#N/A	#N/A	#N/A	#N/A	#N/A	AFUA_1G14300	Fasciclin domain family protein	30.05.02.26	integrin receptor signalling pathway	Cellular communication / signal transduction mechanism	0.0014273	0.068367
AFUA_7G05960	C2H2 finger domain protein, putative		132.007	24.1821	5.45888		#N/A	#N/A	#N/A	#N/A	#N/A	#N/A	#N/A	AFUA_7G05960	C2H2 finger domain protein, putative	1.2	secondary metabolism	Metabolism	0.0024405	0.078984
AFUA_5G09100	MAP kinase MpkC		47.3668	8.69689	5.44641		#N/A	#N/A	#N/A	#N/A	#N/A	#N/A	#N/A	AFUA_5G09100	Mitogen-activated protein kinase mpkC (MAP kinase C) (EC 2.7.11.24)	01.06.05	fatty acid metabolism	Metabolism	0.00056875	0.06568
AFUA_1G01970	VeA-like protein		201.143	36.9313	5.44641		#N/A	#N/A	#N/A	#N/A	#N/A	#N/A	#N/A	AFUA_1G01970	#N/A	#N/A	#N/A	#N/A	#N/A	#N/A
AFUA_1G03730	MFS transporter, putative		39.5419	7.26018	5.44641		#N/A	#N/A	#N/A	#N/A	#N/A	#N/A	#N/A	AFUA_1G03730	MFS transporter, putative	32.07	detoxification	Cell rescue, defense and virulence	8.7992e-06	0.0014049
AFUA_3G03760	hypothetical protein		213.715	39.2395	5.44641		Uncharacterized protein	GO:0005575	cellular_component	CC	ND	3.3105e-7	9.3467e-05	AFUA_3G03760	#N/A	#N/A	#N/A	#N/A	#N/A	#N/A
AFUA_4G04590	ubiquinone biosynthesis protein, putative		199.131	36.73	5.42149		Ubiquinone biosynthesis protein, putative	GO:0008152	metabolic process	BP	IEA	0.0026803	0.41559	AFUA_4G04590	Ubiquinone biosynthesis protein, putative	20.03.25	ABC transporters	Cellular transport, transport facilitation and transport routes	0.026393	0.38309
AFUA_4G13120	glutamine synthetase		4745.27	881.414	5.38371		#N/A	#N/A	#N/A	#N/A	#N/A	#N/A	#N/A	AFUA_4G13120	Glutamine synthetase (EC 6.3.1.2)	1.02	nitrogen, sulfur and selenium metabolism	Metabolism	0.011195	0.25186
AFUA_6G13750	ferric-chelate reductase, putative		36.1732	6.73021	5.37475		Ferric-chelate reductase, putative (EC 1.16.1.7)	GO:0055114	oxidation-reduction process	BP	IEA	7.8355e-8	6.6367e-05	AFUA_6G13750	Ferric-chelate reductase, putative (EC 1.16.1.7)	34.01.01.01	homeostasis of metal ions (Na, K, Ca etc.)	Interaction with the environment	0.0011954	0.067524
AFUA_3G12010	high-affinity hexose transporter, putative		46.5899	8.6683	5.37475		#N/A	#N/A	#N/A	#N/A	#N/A	#N/A	#N/A	AFUA_3G12010	High-affinity hexose transporter, putative	1.2	secondary metabolism	Metabolism	0.0024405	0.078984
AFUA_6G14210	ubiquitin conjugating enzyme (UbcB), putative		621.608	115.653	5.37475		Ubiquitin-conjugating enzyme E2 2 (EC 6.3.2.19) (Ubiquitin carrier protein ubc2) (Ubiquitin-protein ligase ubc2)	GO:0005575	cellular_component	CC	ND	3.3105e-7	9.3467e-05	AFUA_6G14210	Ubiquitin-conjugating enzyme E2 2 (EC 6.3.2.19) (Ubiquitin carrier protein ubc2) (Ubiquitin-protein ligase ubc2)	43.01.03.09	development of asco- basidio- or zygospore	Cell type differentiation	0.035951	0.41473
AFUA_5G04290	WW domain protein, putative		503.267	94.3906	5.33175		WW domain protein, putative	GO:0005575	cellular_component	CC	ND	3.3105e-7	9.3467e-05	AFUA_5G04290	#N/A	#N/A	#N/A	#N/A	#N/A	#N/A
AFUA_5G14000	oxidoreductase, short chain dehydrogenase/reductase family		240.083	45.029	5.33175		Oxidoreductase, short chain dehydrogenase/reductase family (EC 1.1.1.159)	GO:0055114	oxidation-reduction process	BP	IEA	7.8355e-8	6.6367e-05	AFUA_5G14000	Oxidoreductase, short chain dehydrogenase/reductase family (EC 1.1.1.159)	1.05	C-compound and carbohydrate metabolism	Metabolism	2.515e-06	0.0010864
AFUA_8G05230	2-hydroxyphytanoyl-CoA lyase, putative		44.6496	8.37429	5.33175		2-hydroxyphytanoyl-CoA lyase, putative (EC 4.1.1.8)	GO:0008152	metabolic process	BP	IEA	0.0026803	0.41559	AFUA_8G05230	2-hydroxyphytanoyl-CoA lyase, putative (EC 4.1.1.8)	1.05	C-compound and carbohydrate metabolism	Metabolism	2.515e-06	0.0010864
AFUA_3G11400	aspartic endopeptidase Pep2		717.513	134.929	5.31771		#N/A	#N/A	#N/A	#N/A	#N/A	#N/A	#N/A	AFUA_3G11400	Vacuolar protease A (EC 3.4.23.25) (Aspartic endopeptidase pep2) (Aspartic protease pep2)	14.13.04.02	vacuolar protein degradation	Protein fate (folding, modification, destination)	0.00096981	0.066362
AFUA_3G12760	conserved hypothetical protein		145.254	27.347	5.31152		Uncharacterized protein	GO:0005575	cellular_component	CC	ND	3.3105e-7	9.3467e-05	AFUA_3G12760	#N/A	#N/A	#N/A	#N/A	#N/A	#N/A
AFUA_1G04300	conserved hypothetical protein		303.196	57.3951	5.28261		Uncharacterized protein	GO:0005575	cellular_component	CC	ND	3.3105e-7	9.3467e-05	AFUA_1G04300	#N/A	#N/A	#N/A	#N/A	#N/A	#N/A
AFUA_5G12040	conserved hypothetical protein		81.2566	15.3819	5.28261		Uncharacterized protein	GO:0005575	cellular_component	CC	ND	3.3105e-7	9.3467e-05	AFUA_5G12040	#N/A	#N/A	#N/A	#N/A	#N/A	#N/A
AFUA_2G14760	BCS1-like ATPase, putative		80.5171	15.2864	5.26725		BCS1-like ATPase, putative	GO:0005575	cellular_component	CC	ND	3.3105e-7	9.3467e-05	AFUA_2G14760	#N/A	#N/A	#N/A	#N/A	#N/A	#N/A
AFUA_2G11870	beta-1,6 glucan synthetase (Kre6), putative		8.57649	1.66219	5.15976		#N/A	#N/A	#N/A	#N/A	#N/A	#N/A	#N/A	AFUA_2G11870	Beta-1,6 glucan synthetase (Kre6), putative	01.05.03	polysaccharide metabolism	Metabolism	0.012778	0.25186
AFUA_2G10840	RTA1 domain protein, putative		17.4433	3.38064	5.15976		#N/A	#N/A	#N/A	#N/A	#N/A	#N/A	#N/A	AFUA_2G10840	RTA1 domain protein, putative	32.07	detoxification	Cell rescue, defense and virulence	8.7992e-06	0.0014049
AFUA_2G15312	citrate synthase, putative		26.1247	5.06316	5.15976		Citrate synthase	GO:0005575	cellular_component	CC	ND	3.3105e-7	9.3467e-05	AFUA_2G15312	Citrate synthase	1.05	C-compound and carbohydrate metabolism	Metabolism	2.515e-06	0.0010864
AFUA_2G17460	aldehyde dehydrogenase (AldH12), putative		11.4296	2.21513	5.15976		Aldehyde dehydrogenase (AldH12), putative (EC 1.2.1.-)	GO:0055114	oxidation-reduction process	BP	IEA	7.8355e-8	6.6367e-05	AFUA_2G17460	Aldehyde dehydrogenase (AldH12), putative (EC 1.2.1.-)	1.05	C-compound and carbohydrate metabolism	Metabolism	2.515e-06	0.0010864
AFUA_3G09230	carboxylesterase, putative		10.27	1.99041	5.15976		Carboxylesterase, putative (EC 3.1.1.1)	GO:0005575	cellular_component	CC	ND	3.3105e-7	9.3467e-05	AFUA_3G09230	Carboxylesterase, putative (EC 3.1.1.1)	1.05	C-compound and carbohydrate metabolism	Metabolism	2.515e-06	0.0010864
AFUA_7G04900	MFS multidrug transporter, putative		11.4066	2.21068	5.15976		#N/A	#N/A	#N/A	#N/A	#N/A	#N/A	#N/A	AFUA_7G04900	MFS multidrug transporter, putative	20.01.27	drug/toxin transport	Cellular transport, transport facilitation and transport routes	0.0012687	0.067524
AFUA_7G01400	kinesin family protein (BimC), putative		4.75992	0.922508	5.15976		Kinesin family protein (BimC), putative	GO:0008152	metabolic process	BP	IEA	0.0026803	0.41559	AFUA_7G01400	#N/A	#N/A	#N/A	#N/A	#N/A	#N/A
AFUA_1G12480	nuclear RNA binding protein, putative		8.56354	1.65968	5.15976		Nuclear RNA binding protein, putative	GO:0005575	cellular_component	CC	ND	3.3105e-7	9.3467e-05	AFUA_1G12480	#N/A	#N/A	#N/A	#N/A	#N/A	#N/A
AFUA_6G08940	hypothetical protein		288.257	55.8664	5.15976		Uncharacterized protein	GO:0005575	cellular_component	CC	ND	3.3105e-7	9.3467e-05	AFUA_6G08940	#N/A	#N/A	#N/A	#N/A	#N/A	#N/A
AFUA_1G02320	conserved hypothetical protein		24.6481	4.77699	5.15976		Uncharacterized protein	GO:0005575	cellular_component	CC	ND	3.3105e-7	9.3467e-05	AFUA_1G02320	#N/A	#N/A	#N/A	#N/A	#N/A	#N/A
AFUA_4G13310	metallo-beta-lactamase domain protein, putative		18.1701	3.5215	5.15976		Metallo-beta-lactamase domain protein, putative	GO:0005575	cellular_component	CC	ND	3.3105e-7	9.3467e-05	AFUA_4G13310	#N/A	#N/A	#N/A	#N/A	#N/A	#N/A
AFUA_2G08010	conserved hypothetical protein		9.75742	1.89106	5.15976		Uncharacterized protein	GO:0005575	cellular_component	CC	ND	3.3105e-7	9.3467e-05	AFUA_2G08010	#N/A	#N/A	#N/A	#N/A	#N/A	#N/A
AFUA_6G08930	conserved hypothetical protein		171.79	33.2941	5.15976		#N/A	#N/A	#N/A	#N/A	#N/A	#N/A	#N/A	AFUA_6G08930	#N/A	#N/A	#N/A	#N/A	#N/A	#N/A
AFUA_2G13940	conserved hypothetical protein		30.8101	5.97123	5.15976		Uncharacterized protein	GO:0005575	cellular_component	CC	ND	3.3105e-7	9.3467e-05	AFUA_2G13940	#N/A	#N/A	#N/A	#N/A	#N/A	#N/A
AFUA_2G00210	conserved hypothetical protein		55.7156	10.7981	5.15976		Uncharacterized protein	GO:0005575	cellular_component	CC	ND	3.3105e-7	9.3467e-05	AFUA_2G00210	#N/A	#N/A	#N/A	#N/A	#N/A	#N/A
AFUA_7G00250	tubulin beta subunit		12.626	2.44701	5.15976		#N/A	#N/A	#N/A	#N/A	#N/A	#N/A	#N/A	AFUA_7G00250	#N/A	#N/A	#N/A	#N/A	#N/A	#N/A
AFUA_6G08440	protoporphyrinogen oxidase, putative		281.576	54.5715	5.15976		Protoporphyrinogen oxidase, putative (EC 1.3.3.4)	GO:0055114	oxidation-reduction process	BP	IEA	7.8355e-8	6.6367e-05	AFUA_6G08440	Protoporphyrinogen oxidase, putative (EC 1.3.3.4)	1.2	secondary metabolism	Metabolism	0.0024405	0.078984
AFUA_1G05680	hypothetical protein		82.1603	15.9233	5.15976		Uncharacterized protein	GO:0005575	cellular_component	CC	ND	3.3105e-7	9.3467e-05	AFUA_1G05680	#N/A	#N/A	#N/A	#N/A	#N/A	#N/A
AFUA_2G12450	hydroxymethylglutaryl-CoA lyase		15.9692	3.09495	5.15976		Hydroxymethylglutaryl-CoA lyase (EC 4.1.3.4)	GO:0008152	metabolic process	BP	IEA	0.0026803	0.41559	AFUA_2G12450	Hydroxymethylglutaryl-CoA lyase (EC 4.1.3.4)	1.06	lipid, fatty acid and isoprenoid metabolism	Metabolism	4.5362e-06	0.0010864
AFUA_6G14130	ubiquitin conjugating enzyme, putative		301.903	58.511	5.15976		Ubiquitin conjugating enzyme, putative (EC 6.3.2.19)	GO:0005575	cellular_component	CC	ND	3.3105e-7	9.3467e-05	AFUA_6G14130	#N/A	#N/A	#N/A	#N/A	#N/A	#N/A
AFUA_2G15290	DUF636 domain protein		165.52	32.079	5.15976		DUF636 domain protein	GO:0008152	metabolic process	BP	IEA	0.0026803	0.41559	AFUA_2G15290	#N/A	#N/A	#N/A	#N/A	#N/A	#N/A
AFUA_2G17511	#N/A		101.083	19.5906	5.15976		#N/A	#N/A	#N/A	#N/A	#N/A	#N/A	#N/A	AFUA_2G17511	#N/A	#N/A	#N/A	#N/A	#N/A	#N/A
AFUA_3G11530	Hsp40 co-chaperone Jid1, putative		72.6803	14.086	5.15976		#N/A	#N/A	#N/A	#N/A	#N/A	#N/A	#N/A	AFUA_3G11530	#N/A	#N/A	#N/A	#N/A	#N/A	#N/A
AFUA_4G03325	conserved hypothetical protein		143.521	27.8154	5.15976		Uncharacterized protein	GO:0005575	cellular_component	CC	ND	3.3105e-7	9.3467e-05	AFUA_4G03325	#N/A	#N/A	#N/A	#N/A	#N/A	#N/A
AFUA_1G09880	conserved hypothetical protein		28.6316	5.54902	5.15976		Uncharacterized protein	GO:0005575	cellular_component	CC	ND	3.3105e-7	9.3467e-05	AFUA_1G09880	#N/A	#N/A	#N/A	#N/A	#N/A	#N/A
AFUA_2G01405	cyanovirin-N family protein		50.6166	9.80988	5.15976		Cyanovirin-N family protein	GO:0005575	cellular_component	CC	ND	3.3105e-7	9.3467e-05	AFUA_2G01405	#N/A	#N/A	#N/A	#N/A	#N/A	#N/A
AFUA_2G02240	conserved hypothetical protein		35.994	6.97592	5.15976		Uncharacterized protein	GO:0005575	cellular_component	CC	ND	3.3105e-7	9.3467e-05	AFUA_2G02240	#N/A	#N/A	#N/A	#N/A	#N/A	#N/A
AFUA_3G09730	hypothetical protein		10.27	1.99041	5.15976		Uncharacterized protein	GO:0005575	cellular_component	CC	ND	3.3105e-7	9.3467e-05	AFUA_3G09730	#N/A	#N/A	#N/A	#N/A	#N/A	#N/A
AFUA_3G14160	conserved hypothetical protein		33.1524	6.42519	5.15976		Uncharacterized protein	GO:0005575	cellular_component	CC	ND	3.3105e-7	9.3467e-05	AFUA_3G14160	#N/A	#N/A	#N/A	#N/A	#N/A	#N/A
AFUA_5G14220	hypothetical protein		27.2551	5.28224	5.15976		Uncharacterized protein	GO:0005575	cellular_component	CC	ND	3.3105e-7	9.3467e-05	AFUA_5G14220	#N/A	#N/A	#N/A	#N/A	#N/A	#N/A
AFUA_5G14250	DNA repair family protein		17.8272	3.45505	5.15976		DNA repair family protein	GO:0055114	oxidation-reduction process	BP	IEA	7.8355e-8	6.6367e-05	AFUA_5G14250	#N/A	#N/A	#N/A	#N/A	#N/A	#N/A
AFUA_6G04660	centromere protein Cse4, putative		31.3208	6.0702	5.15976		#N/A	#N/A	#N/A	#N/A	#N/A	#N/A	#N/A	AFUA_6G04660	#N/A	#N/A	#N/A	#N/A	#N/A	#N/A
AFUA_7G04720	alpha-1,2-mannosidase, putative		7.14888	1.38551	5.15976		Alpha-1,2-mannosidase, putative	GO:0005575	cellular_component	CC	ND	3.3105e-7	9.3467e-05	AFUA_7G04720	#N/A	#N/A	#N/A	#N/A	#N/A	#N/A
AFUA_5G03780	L-PSP endoribonuclease family protein Brt1, putative		87.8924	17.0342	5.15976		L-PSP endoribonuclease family protein Brt1, putative	GO:0008152	metabolic process	BP	IEA	0.0026803	0.41559	AFUA_5G03780	#N/A	#N/A	#N/A	#N/A	#N/A	#N/A
AFUA_4G03590	MFS transporter, putative		12.4595	2.41474	5.15976		#N/A	#N/A	#N/A	#N/A	#N/A	#N/A	#N/A	AFUA_4G03590	#N/A	#N/A	#N/A	#N/A	#N/A	#N/A
AFUA_6G09200	conserved hypothetical protein		21.2324	4.11501	5.15976		Uncharacterized protein	GO:0055114	oxidation-reduction process	BP	IEA	7.8355e-8	6.6367e-05	AFUA_6G09200	#N/A	#N/A	#N/A	#N/A	#N/A	#N/A
AFUA_3G13060	ubiquitin conjugating enzyme, putative		5.33308	1.03359	5.15976		Ubiquitin conjugating enzyme, putative (EC 6.3.2.19)	GO:0005575	cellular_component	CC	ND	3.3105e-7	9.3467e-05	AFUA_3G13060	#N/A	#N/A	#N/A	#N/A	#N/A	#N/A
AFUA_2G02080	C2H2 finger domain protein, putative		54.7736	10.6155	5.15976		#N/A	#N/A	#N/A	#N/A	#N/A	#N/A	#N/A	AFUA_2G02080	#N/A	#N/A	#N/A	#N/A	#N/A	#N/A
AFUA_3G14960	lipase/esterase, putative		15.7474	3.05196	5.15976		Lipase/esterase, putative	GO:0005575	cellular_component	CC	ND	3.3105e-7	9.3467e-05	AFUA_3G14960	Lipase/esterase, putative	1.06	lipid, fatty acid and isoprenoid metabolism	Metabolism	4.5362e-06	0.0010864
AFUA_5G01490	hypothetical protein		29.3734	5.69278	5.15976		Uncharacterized protein	GO:0005575	cellular_component	CC	ND	3.3105e-7	9.3467e-05	AFUA_5G01490	#N/A	#N/A	#N/A	#N/A	#N/A	#N/A
AFUA_1G17350	CP2 transcription factor, putative		166.824	32.6179	5.1145		CP2 transcription factor, putative	GO:0005575	cellular_component	CC	ND	3.3105e-7	9.3467e-05	AFUA_1G17350	#N/A	#N/A	#N/A	#N/A	#N/A	#N/A
AFUA_6G12180	conserved hypothetical protein		448.584	88.1989	5.08605		#N/A	#N/A	#N/A	#N/A	#N/A	#N/A	#N/A	AFUA_6G12180	#N/A	#N/A	#N/A	#N/A	#N/A	#N/A
AFUA_7G01520	BolA domain protein		528.001	105.023	5.02746		#N/A	#N/A	#N/A	#N/A	#N/A	#N/A	#N/A	AFUA_7G01520	#N/A	#N/A	#N/A	#N/A	#N/A	#N/A
AFUA_4G06890	14-alpha sterol demethylase Cyp51A		139.163	27.6806	5.02746		14-alpha sterol demethylase Cyp51A (EC 1.14.13.-)	GO:0055114	oxidation-reduction process	BP	IEA	7.8355e-8	6.6367e-05	AFUA_4G06890	14-alpha sterol demethylase Cyp51A (EC 1.14.13.-)	1.2	secondary metabolism	Metabolism	0.0024405	0.078984
AFUA_7G01730	phosphatidylserine decarboxylase family protein		77.9942	15.5477	5.01643		Phosphatidylserine decarboxylase family protein (EC 4.1.1.-)	GO:0005575	cellular_component	CC	ND	3.3105e-7	9.3467e-05	AFUA_7G01730	Phosphatidylserine decarboxylase family protein (EC 4.1.1.-)	1.06	lipid, fatty acid and isoprenoid metabolism	Metabolism	4.5362e-06	0.0010864
AFUA_3G02080	MFS allantoate transporter, putative		64.3376	12.8254	5.01643		#N/A	#N/A	#N/A	#N/A	#N/A	#N/A	#N/A	AFUA_3G02080	#N/A	#N/A	#N/A	#N/A	#N/A	#N/A
AFUA_5G01920	GPI anchored protein, putative		293.544	58.6688	5.0034		GPI anchored protein, putative	GO:0005575	cellular_component	CC	ND	3.3105e-7	9.3467e-05	AFUA_5G01920	#N/A	#N/A	#N/A	#N/A	#N/A	#N/A
AFUA_3G10750	acetate kinase, putative		116.598	23.3767	4.98777		Probable acetate kinase (EC 2.7.2.1) (Acetokinase)	GO:0008152	metabolic process	BP	IEA	0.0026803	0.41559	AFUA_3G10750	Probable acetate kinase (EC 2.7.2.1) (Acetokinase)	1.05	C-compound and carbohydrate metabolism	Metabolism	2.515e-06	0.0010864
AFUA_2G00590	glutathione S-transferase, putative		666.949	133.876	4.98184		Glutathione S-transferase, putative (EC 2.5.1.18)	GO:0005575	cellular_component	CC	ND	3.3105e-7	9.3467e-05	AFUA_2G00590	Glutathione S-transferase, putative (EC 2.5.1.18)	32.01.01	oxidative stress response	Cell rescue, defense and virulence	0.030979	0.41473
AFUA_2G05120	conserved hypothetical protein		112.97	22.6907	4.97872		Uncharacterized protein	GO:0005575	cellular_component	CC	ND	3.3105e-7	9.3467e-05	AFUA_2G05120	#N/A	#N/A	#N/A	#N/A	#N/A	#N/A
AFUA_3G14680	lysophospholipase Plb3		277.014	55.7189	4.97164		Lysophospholipase 3 (EC 3.1.1.5) (Phospholipase B 3)	GO:0008152	metabolic process	BP	IEA	0.0026803	0.41559	AFUA_3G14680	Lysophospholipase 3 (EC 3.1.1.5) (Phospholipase B 3)	1.06	lipid, fatty acid and isoprenoid metabolism	Metabolism	4.5362e-06	0.0010864
AFUA_3G05340	autophagy cysteine endopeptidase Atg4, putative		886.571	179.084	4.95058		Autophagy cysteine endopeptidase Atg4, putative	GO:0005575	cellular_component	CC	ND	3.3105e-7	9.3467e-05	AFUA_3G05340	Autophagy cysteine endopeptidase Atg4, putative	14.13.04	lysosomal and vacuolar protein degradation	Protein fate (folding, modification, destination)	0.0071082	0.2128
AFUA_5G09600	2-nitropropane dioxygenase family oxidoreductase, putative		64.6768	13.0798	4.94477		2-nitropropane dioxygenase family oxidoreductase, putative (EC 1.3.1.9)	GO:0055114	oxidation-reduction process	BP	IEA	7.8355e-8	6.6367e-05	AFUA_5G09600	2-nitropropane dioxygenase family oxidoreductase, putative (EC 1.3.1.9)	1.05	C-compound and carbohydrate metabolism	Metabolism	2.515e-06	0.0010864
AFUA_1G00480	glucosamine-6-phosphate deaminase, putative		119.403	24.1474	4.94477		Glucosamine-6-phosphate deaminase, putative (EC 3.5.99.6)	GO:0005575	cellular_component	CC	ND	3.3105e-7	9.3467e-05	AFUA_1G00480	Glucosamine-6-phosphate deaminase, putative (EC 3.5.99.6)	1.05	C-compound and carbohydrate metabolism	Metabolism	2.515e-06	0.0010864
AFUA_1G06590	phosphoglycerate mutase family protein, putative		116.211	23.5017	4.94477		Phosphoglycerate mutase family protein, putative	GO:0005575	cellular_component	CC	ND	3.3105e-7	9.3467e-05	AFUA_1G06590	#N/A	#N/A	#N/A	#N/A	#N/A	#N/A
AFUA_3G00850	hypothetical protein		201.629	40.8948	4.93044		Uncharacterized protein	GO:0005575	cellular_component	CC	ND	3.3105e-7	9.3467e-05	AFUA_3G00850	#N/A	#N/A	#N/A	#N/A	#N/A	#N/A
AFUA_3G05960	conserved hypothetical protein		198.533	40.4432	4.90894		#N/A	#N/A	#N/A	#N/A	#N/A	#N/A	#N/A	AFUA_3G05960	#N/A	#N/A	#N/A	#N/A	#N/A	#N/A
AFUA_4G03170	conserved hypothetical protein		85.438	17.5326	4.87311		Uncharacterized protein	GO:0005575	cellular_component	CC	ND	3.3105e-7	9.3467e-05	AFUA_4G03170	#N/A	#N/A	#N/A	#N/A	#N/A	#N/A
AFUA_2G10020	conserved hypothetical protein		434.117	89.0843	4.87311		Uncharacterized protein	GO:0005575	cellular_component	CC	ND	3.3105e-7	9.3467e-05	AFUA_2G10020	#N/A	#N/A	#N/A	#N/A	#N/A	#N/A
AFUA_4G02930	RNA helicase/RNAse III, putative		11.5974	2.37987	4.87311		Dicer-like protein 2 [Includes: Endoribonuclease dcl2 (EC 3.1.26.-); ATP-dependent helicase dcl2 (EC 3.6.4.-)]	GO:0005575	cellular_component	CC	ND	3.3105e-7	9.3467e-05	AFUA_4G02930	Dicer-like protein 2 [Includes: Endoribonuclease dcl2 (EC 3.1.26.-); ATP-dependent helicase dcl2 (EC 3.6.4.-)]	40.10.02.04	regulation of apoptosis	Cell fate	0.034876	0.41473
AFUA_6G09315	hypothetical protein		391.089	80.4913	4.85877		Uncharacterized protein	GO:0005575	cellular_component	CC	ND	3.3105e-7	9.3467e-05	AFUA_6G09315	#N/A	#N/A	#N/A	#N/A	#N/A	#N/A
AFUA_1G06780	CBS and PB1 domain protein		265.47	54.7694	4.84705		#N/A	#N/A	#N/A	#N/A	#N/A	#N/A	#N/A	AFUA_1G06780	#N/A	#N/A	#N/A	#N/A	#N/A	#N/A
AFUA_4G12270	LIM domain protein		52.6865	10.8918	4.83727		LIM domain protein	GO:0005575	cellular_component	CC	ND	3.3105e-7	9.3467e-05	AFUA_4G12270	LIM domain protein	30.05.02.26	integrin receptor signalling pathway	Cellular communication / signal transduction mechanism	0.0014273	0.068367
AFUA_6G13090	conserved hypothetical protein		130.423	26.9621	4.83727		Uncharacterized protein	GO:0005575	cellular_component	CC	ND	3.3105e-7	9.3467e-05	AFUA_6G13090	#N/A	#N/A	#N/A	#N/A	#N/A	#N/A
AFUA_4G09210	phosphate transporter		44.1663	9.17117	4.81578		#N/A	#N/A	#N/A	#N/A	#N/A	#N/A	#N/A	AFUA_4G09210	Phosphate transporter	20.01.01.01.01	heavy metal ion transport (Cu+, Fe3+, etc.)	Cellular transport, transport facilitation and transport routes	0.037852	0.42165
AFUA_1G13970	MFS transporter, putative		76.683	15.9233	4.81578		#N/A	#N/A	#N/A	#N/A	#N/A	#N/A	#N/A	AFUA_1G13970	MFS transporter, putative	32.07	detoxification	Cell rescue, defense and virulence	8.7992e-06	0.0014049
AFUA_4G11110	C2 domain protein		67.6517	14.1426	4.78353		#N/A	#N/A	#N/A	#N/A	#N/A	#N/A	#N/A	AFUA_4G11110	#N/A	#N/A	#N/A	#N/A	#N/A	#N/A
AFUA_1G13360	C4-dicarboxylate transporter/malic acid transport protein, putative		208.146	43.5131	4.78353		#N/A	#N/A	#N/A	#N/A	#N/A	#N/A	#N/A	AFUA_1G13360	C4-dicarboxylate transporter/malic acid transport protein, putative	1.05	C-compound and carbohydrate metabolism	Metabolism	2.515e-06	0.0010864
AFUA_3G06040	glutaryl-CoA dehydrogenase, putative		328.832	68.8285	4.77756		Glutaryl-CoA dehydrogenase, putative (EC 1.3.8.6)	GO:0055114	oxidation-reduction process	BP	IEA	7.8355e-8	6.6367e-05	AFUA_3G06040	Glutaryl-CoA dehydrogenase, putative (EC 1.3.8.6)	1.06	lipid, fatty acid and isoprenoid metabolism	Metabolism	4.5362e-06	0.0010864
AFUA_3G06670	pyridoxamine phosphate oxidase, putative		449.188	94.5608	4.75026		Pyridoxamine phosphate oxidase, putative	GO:0055114	oxidation-reduction process	BP	IEA	7.8355e-8	6.6367e-05	AFUA_3G06670	#N/A	#N/A	#N/A	#N/A	#N/A	#N/A
AFUA_4G07860	hypothetical protein		141.405	29.8968	4.72978		Uncharacterized protein	GO:0005575	cellular_component	CC	ND	3.3105e-7	9.3467e-05	AFUA_4G07860	#N/A	#N/A	#N/A	#N/A	#N/A	#N/A
AFUA_6G02000	NCS1 allantoate transporter		18.9313	4.00257	4.72978		#N/A	#N/A	#N/A	#N/A	#N/A	#N/A	#N/A	AFUA_6G02000	#N/A	#N/A	#N/A	#N/A	#N/A	#N/A
AFUA_5G07330	carboxypeptidase S1, putative		33.8543	7.1577	4.72978		#N/A	#N/A	#N/A	#N/A	#N/A	#N/A	#N/A	AFUA_5G07330	Carboxypeptidase S1, putative (EC 3.4.16.6)	14.13.04.02	vacuolar protein degradation	Protein fate (folding, modification, destination)	0.00096981	0.066362
AFUA_3G10670	conserved hypothetical protein		16.1386	3.41213	4.72978		Uncharacterized protein	GO:0005575	cellular_component	CC	ND	3.3105e-7	9.3467e-05	AFUA_3G10670	#N/A	#N/A	#N/A	#N/A	#N/A	#N/A
AFUA_3G10540	3-oxoacyl-(acyl-carrier-protein) reductase, putative		32.2773	6.82427	4.72978		3-oxoacyl-(Acyl-carrier-protein) reductase, putative (EC 1.1.1.100)	GO:0055114	oxidation-reduction process	BP	IEA	7.8355e-8	6.6367e-05	AFUA_3G10540	3-oxoacyl-(Acyl-carrier-protein) reductase, putative (EC 1.1.1.100)	1.06	lipid, fatty acid and isoprenoid metabolism	Metabolism	4.5362e-06	0.0010864
AFUA_2G09330	C6 finger domain protein, putative		115.91	24.5065	4.72978		#N/A	#N/A	#N/A	#N/A	#N/A	#N/A	#N/A	AFUA_2G09330	#N/A	#N/A	#N/A	#N/A	#N/A	#N/A
AFUA_2G04120	conserved hypothetical protein		29.1128	6.15522	4.72978		Uncharacterized protein	GO:0005575	cellular_component	CC	ND	3.3105e-7	9.3467e-05	AFUA_2G04120	#N/A	#N/A	#N/A	#N/A	#N/A	#N/A
AFUA_5G04070	meiosis-specific topoisomerase Spo11, putative		26.7179	5.64888	4.72978		#N/A	#N/A	#N/A	#N/A	#N/A	#N/A	#N/A	AFUA_5G04070	Meiosis-specific topoisomerase Spo11, putative (EC 5.99.1.3)	01.03.16.03	DNA degradation	Metabolism	0.050511	0.49378
AFUA_2G13615	IQ calmodulin-binding motif protein		47.1707	9.97313	4.72978		IQ calmodulin-binding motif protein	GO:0005575	cellular_component	CC	ND	3.3105e-7	9.3467e-05	AFUA_2G13615	#N/A	#N/A	#N/A	#N/A	#N/A	#N/A
AFUA_2G13990	conserved hypothetical protein		20.0256	4.23394	4.72978		Uncharacterized protein	GO:0005575	cellular_component	CC	ND	3.3105e-7	9.3467e-05	AFUA_2G13990	#N/A	#N/A	#N/A	#N/A	#N/A	#N/A
AFUA_2G01130	ubiquitin conjugating enzyme (UbcJ), putative		62.9896	13.3177	4.72978		#N/A	#N/A	#N/A	#N/A	#N/A	#N/A	#N/A	AFUA_2G01130	Ubiquitin conjugating enzyme (UbcJ), putative (EC 6.3.2.19)	43.01.03.09	development of asco- basidio- or zygospore	Cell type differentiation	0.035951	0.41473
AFUA_1G10012	conserved hypothetical protein		5.38512	1.13856	4.72978		Uncharacterized protein	GO:0005575	cellular_component	CC	ND	3.3105e-7	9.3467e-05	AFUA_1G10012	#N/A	#N/A	#N/A	#N/A	#N/A	#N/A
AFUA_4G04410	3-hydroxybutyryl-CoA dehydrogenase, putative		122.635	25.9282	4.72978		3-hydroxybutyryl-CoA dehydrogenase, putative (EC 1.1.1.157)	GO:0055114	oxidation-reduction process	BP	IEA	7.8355e-8	6.6367e-05	AFUA_4G04410	3-hydroxybutyryl-CoA dehydrogenase, putative (EC 1.1.1.157)	1.05	C-compound and carbohydrate metabolism	Metabolism	2.515e-06	0.0010864
AFUA_2G04280	asparaginase, putative		77.7144	16.6471	4.66835		Asparaginase, putative (EC 3.5.1.1)	GO:0005575	cellular_component	CC	ND	3.3105e-7	9.3467e-05	AFUA_2G04280	#N/A	#N/A	#N/A	#N/A	#N/A	#N/A
AFUA_2G10120	YjeF domain protein		97.301	20.8427	4.66835		#N/A	#N/A	#N/A	#N/A	#N/A	#N/A	#N/A	AFUA_2G10120	#N/A	#N/A	#N/A	#N/A	#N/A	#N/A
AFUA_2G02310	actin cortical patch protein Sur7, putative		106.295	22.8897	4.64378		#N/A	#N/A	#N/A	#N/A	#N/A	#N/A	#N/A	AFUA_2G02310	Actin cortical patch protein Sur7, putative	43.01.03.09	development of asco- basidio- or zygospore	Cell type differentiation	0.035951	0.41473
AFUA_2G12490	lipase, putative		34.1968	7.36399	4.64378		Lipase, putative (EC 3.1.1.-)	GO:0005575	cellular_component	CC	ND	3.3105e-7	9.3467e-05	AFUA_2G12490	Lipase, putative (EC 3.1.1.-)	1.06	lipid, fatty acid and isoprenoid metabolism	Metabolism	4.5362e-06	0.0010864
AFUA_3G09620	RNA binding protein, putative		91.2847	19.6979	4.63423		RNA binding protein, putative	GO:0005575	cellular_component	CC	ND	3.3105e-7	9.3467e-05	AFUA_3G09620	#N/A	#N/A	#N/A	#N/A	#N/A	#N/A
AFUA_6G12160	C6 transcription factor, putative		94.7551	20.463	4.63055		#N/A	#N/A	#N/A	#N/A	#N/A	#N/A	#N/A	AFUA_6G12160	C6 transcription factor, putative	1.2	secondary metabolism	Metabolism	0.0024405	0.078984
AFUA_8G05590	oxidoreductase, short chain dehydrogenase/reductase family		351.036	76.2991	4.60079		Oxidoreductase, short chain dehydrogenase/reductase family	GO:0005575	cellular_component	CC	ND	3.3105e-7	9.3467e-05	AFUA_8G05590	Oxidoreductase, short chain dehydrogenase/reductase family	1.05	C-compound and carbohydrate metabolism	Metabolism	2.515e-06	0.0010864
AFUA_5G03930	alcohol dehydrogenase, putative		33.6693	7.34102	4.58645		Alcohol dehydrogenase, putative (EC 1.-.-.-)	GO:0055114	oxidation-reduction process	BP	IEA	7.8355e-8	6.6367e-05	AFUA_5G03930	Alcohol dehydrogenase, putative (EC 1.-.-.-)	1.05	C-compound and carbohydrate metabolism	Metabolism	2.515e-06	0.0010864
AFUA_2G17790	amino acid transporter, putative		25.3224	5.52114	4.58645		Amino acid transporter, putative	GO:0005575	cellular_component	CC	ND	3.3105e-7	9.3467e-05	AFUA_2G17790	#N/A	#N/A	#N/A	#N/A	#N/A	#N/A
AFUA_6G09380	hypothetical protein		131.457	28.6619	4.58645		Uncharacterized protein	GO:0005575	cellular_component	CC	ND	3.3105e-7	9.3467e-05	AFUA_6G09380	#N/A	#N/A	#N/A	#N/A	#N/A	#N/A
AFUA_4G08240	zinc-containing alcohol dehydrogenase, putative		939.335	205.007	4.58197		Zinc-containing alcohol dehydrogenase, putative (EC 1.1.1.1)	GO:0055114	oxidation-reduction process	BP	IEA	7.8355e-8	6.6367e-05	AFUA_4G08240	Zinc-containing alcohol dehydrogenase, putative (EC 1.1.1.1)	1.05	C-compound and carbohydrate metabolism	Metabolism	2.515e-06	0.0010864
AFUA_5G06090	integral membrane protein (Ytp1), putative		164.237	35.9495	4.56854		Integral membrane protein (Ytp1), putative	GO:0005575	cellular_component	CC	ND	3.3105e-7	9.3467e-05	AFUA_5G06090	#N/A	#N/A	#N/A	#N/A	#N/A	#N/A
AFUA_3G09390	AMMECR1 family protein		145.15	31.8466	4.55779		#N/A	#N/A	#N/A	#N/A	#N/A	#N/A	#N/A	AFUA_3G09390	#N/A	#N/A	#N/A	#N/A	#N/A	#N/A
AFUA_5G07130	zinc finger protein gcs1		217.337	47.8855	4.53868		#N/A	#N/A	#N/A	#N/A	#N/A	#N/A	#N/A	AFUA_5G07130	Zinc finger protein gcs1	20.09.16	cellular export and secretion	Cellular transport, transport facilitation and transport routes	0.00089546	0.066362
AFUA_1G13550	conserved hypothetical protein		243.457	53.9243	4.51479		#N/A	#N/A	#N/A	#N/A	#N/A	#N/A	#N/A	AFUA_1G13550	#N/A	#N/A	#N/A	#N/A	#N/A	#N/A
AFUA_8G05070	neutral amino acid permease		85.7094	18.9841	4.51479		Neutral amino acid permease	GO:0005575	cellular_component	CC	ND	3.3105e-7	9.3467e-05	AFUA_8G05070	Neutral amino acid permease	1.2	secondary metabolism	Metabolism	0.0024405	0.078984
AFUA_3G09680	ABC efflux transporter, putative		15.2629	3.38064	4.51479		ABC efflux transporter, putative (EC 3.6.3.-)	GO:0008152	metabolic process	BP	IEA	0.0026803	0.41559	AFUA_3G09680	ABC efflux transporter, putative (EC 3.6.3.-)	32.07	detoxification	Cell rescue, defense and virulence	8.7992e-06	0.0014049
AFUA_3G08850	FAD dependent sulfhydryl oxidase Erv1, putative		359.126	79.5444	4.51479		Sulfhydryl oxidase (EC 1.8.3.2)	GO:0055114	oxidation-reduction process	BP	IEA	7.8355e-8	6.6367e-05	AFUA_3G08850	Sulfhydryl oxidase (EC 1.8.3.2)	34.01.01.01	homeostasis of metal ions (Na, K, Ca etc.)	Interaction with the environment	0.0011954	0.067524
AFUA_5G03390	conserved hypothetical protein		39.0585	8.65123	4.51479		Uncharacterized protein	GO:0005575	cellular_component	CC	ND	3.3105e-7	9.3467e-05	AFUA_5G03390	#N/A	#N/A	#N/A	#N/A	#N/A	#N/A
AFUA_3G01430	benzodiazepine receptor family protein		360.952	80.2426	4.49825		#N/A	#N/A	#N/A	#N/A	#N/A	#N/A	#N/A	AFUA_3G01430	Benzodiazepine receptor family protein	20.01.13	lipid/fatty acid transport	Cellular transport, transport facilitation and transport routes	0.048237	0.48136
AFUA_2G08250	glycerol 3-phosphate dehydrogenase (GfdB), putative		109.92	24.4761	4.4909		Glycerol 3-phosphate dehydrogenase (GfdB), putative (EC 1.1.1.8)	GO:0055114	oxidation-reduction process	BP	IEA	7.8355e-8	6.6367e-05	AFUA_2G08250	Glycerol 3-phosphate dehydrogenase (GfdB), putative (EC 1.1.1.8)	1.05	C-compound and carbohydrate metabolism	Metabolism	2.515e-06	0.0010864
AFUA_2G14250	CBF/NF-Y family transcription factor, putative		198.112	44.3027	4.47179		#N/A	#N/A	#N/A	#N/A	#N/A	#N/A	#N/A	AFUA_2G14250	#N/A	#N/A	#N/A	#N/A	#N/A	#N/A
AFUA_5G03340	conserved hypothetical protein		359.76	81.4672	4.41601		Uncharacterized protein	GO:0005575	cellular_component	CC	ND	3.3105e-7	9.3467e-05	AFUA_5G03340	#N/A	#N/A	#N/A	#N/A	#N/A	#N/A
AFUA_3G01790	isoflavone reductase family protein		121.058	27.4677	4.40729		Isoflavone reductase family protein (EC 1.3.1.-)	GO:0055114	oxidation-reduction process	BP	IEA	7.8355e-8	6.6367e-05	AFUA_3G01790	#N/A	#N/A	#N/A	#N/A	#N/A	#N/A
AFUA_2G09140	conserved hypothetical protein		275.354	62.7832	4.3858		Uncharacterized protein	GO:0005575	cellular_component	CC	ND	3.3105e-7	9.3467e-05	AFUA_2G09140	#N/A	#N/A	#N/A	#N/A	#N/A	#N/A
AFUA_6G02090	ATP synthase subunit E, putative		490.67	113.172	4.33563		ATP synthase subunit E, putative (EC 3.6.3.14)	GO:0008152	metabolic process	BP	IEA	0.0026803	0.41559	AFUA_6G02090	#N/A	#N/A	#N/A	#N/A	#N/A	#N/A
AFUA_2G09120	SNF2 family helicase, putative		4.46524	1.03848	4.2998		SNF2 family helicase, putative	GO:0005575	cellular_component	CC	ND	3.3105e-7	9.3467e-05	AFUA_2G09120	#N/A	#N/A	#N/A	#N/A	#N/A	#N/A
AFUA_2G16000	conserved hypothetical protein		6.71054	1.56066	4.2998		Uncharacterized protein	GO:0005575	cellular_component	CC	ND	3.3105e-7	9.3467e-05	AFUA_2G16000	#N/A	#N/A	#N/A	#N/A	#N/A	#N/A
AFUA_3G07650	pectin methylesterase, putative		12.0209	2.79569	4.2998		Pectin methylesterase, putative (EC 3.1.1.11)	GO:0008152	metabolic process	BP	IEA	0.0026803	0.41559	AFUA_3G07650	Pectin methylesterase, putative (EC 3.1.1.11)	1.05	C-compound and carbohydrate metabolism	Metabolism	2.515e-06	0.0010864
AFUA_4G14570	metallo-beta-lactamase domain protein, putative		11.1948	2.60357	4.2998		Metallo-beta-lactamase domain protein, putative	GO:0005575	cellular_component	CC	ND	3.3105e-7	9.3467e-05	AFUA_4G14570	Metallo-beta-lactamase domain protein, putative	1.2	secondary metabolism	Metabolism	0.0024405	0.078984
AFUA_5G01420	conserved hypothetical protein		22.9331	5.33353	4.2998		#N/A	#N/A	#N/A	#N/A	#N/A	#N/A	#N/A	AFUA_5G01420	#N/A	#N/A	#N/A	#N/A	#N/A	#N/A
AFUA_6G06660	beta-galactosidase, putative		4.80104	1.11657	4.2998		Probable beta-galactosidase C (EC 3.2.1.23) (Lactase C)	GO:0005575	cellular_component	CC	ND	3.3105e-7	9.3467e-05	AFUA_6G06660	Probable beta-galactosidase C (EC 3.2.1.23) (Lactase C)	1.05	C-compound and carbohydrate metabolism	Metabolism	2.515e-06	0.0010864
AFUA_8G02000	sorbitol/xylitol dehydrogenase, putative		12.8028	2.97752	4.2998		Sorbitol/xylitol dehydrogenase, putative (EC 1.1.1.14)	GO:0055114	oxidation-reduction process	BP	IEA	7.8355e-8	6.6367e-05	AFUA_8G02000	Sorbitol/xylitol dehydrogenase, putative (EC 1.1.1.14)	1.05	C-compound and carbohydrate metabolism	Metabolism	2.515e-06	0.0010864
AFUA_8G02670	conserved hypothetical protein		21.0903	4.90494	4.2998		Uncharacterized protein	GO:0005575	cellular_component	CC	ND	3.3105e-7	9.3467e-05	AFUA_8G02670	#N/A	#N/A	#N/A	#N/A	#N/A	#N/A
AFUA_8G06230	hypothetical protein		13.8948	3.23149	4.2998		Uncharacterized protein	GO:0005575	cellular_component	CC	ND	3.3105e-7	9.3467e-05	AFUA_8G06230	#N/A	#N/A	#N/A	#N/A	#N/A	#N/A
AFUA_4G10850	conserved hypothetical protein		5.41768	1.25998	4.2998		Uncharacterized protein	GO:0005575	cellular_component	CC	ND	3.3105e-7	9.3467e-05	AFUA_4G10850	#N/A	#N/A	#N/A	#N/A	#N/A	#N/A
AFUA_6G10230	FAD dependent oxidoreductase superfamily		13.3077	3.09495	4.2998		FAD dependent oxidoreductase superfamily (EC 1.4.3.3)	GO:0055114	oxidation-reduction process	BP	IEA	7.8355e-8	6.6367e-05	AFUA_6G10230	FAD dependent oxidoreductase superfamily (EC 1.4.3.3)	16.21.05	FAD/FMN binding	Protein with binding function or cofactor requirement (structural or analytic)	0.0093456	0.22383
AFUA_1G14530	general amidase, putative		16.3468	3.80175	4.2998		General amidase, putative	GO:0005575	cellular_component	CC	ND	3.3105e-7	9.3467e-05	AFUA_1G14530	General amidase, putative	1.06	lipid, fatty acid and isoprenoid metabolism	Metabolism	4.5362e-06	0.0010864
AFUA_3G12580	MFS sugar transporter protein, putative		8.11721	1.88781	4.2998		#N/A	#N/A	#N/A	#N/A	#N/A	#N/A	#N/A	AFUA_3G12580	MFS sugar transporter protein, putative	1.2	secondary metabolism	Metabolism	0.0024405	0.078984
AFUA_6G10000	hypothetical protein		122.707	28.5378	4.2998		Uncharacterized protein	GO:0005575	cellular_component	CC	ND	3.3105e-7	9.3467e-05	AFUA_6G10000	#N/A	#N/A	#N/A	#N/A	#N/A	#N/A
AFUA_2G10230	inositol oxygenase, putative		14.9501	3.47692	4.2998		Inositol oxygenase, putative (EC 1.13.99.1)	GO:0055114	oxidation-reduction process	BP	IEA	7.8355e-8	6.6367e-05	AFUA_2G10230	Inositol oxygenase, putative (EC 1.13.99.1)	01.05.02	sugar, glucoside, polyol and carboxylate metabolism	Metabolism	0.013145	0.25186
AFUA_1G12340	carnitine acetyl transferase		51.4745	11.9714	4.2998		Carnitine acetyl transferase	GO:0008152	metabolic process	BP	IEA	0.0026803	0.41559	AFUA_1G12340	Carnitine acetyl transferase	1.05	C-compound and carbohydrate metabolism	Metabolism	2.515e-06	0.0010864
AFUA_5G03280	conserved hypothetical protein		24.7341	5.75239	4.2998		Uncharacterized protein	GO:0005575	cellular_component	CC	ND	3.3105e-7	9.3467e-05	AFUA_5G03280	#N/A	#N/A	#N/A	#N/A	#N/A	#N/A
AFUA_8G05040	dihydrodipicolinate synthetase family protein		89.4174	20.7957	4.2998		Dihydrodipicolinate synthetase family protein (EC 4.2.1.-)	GO:0005575	cellular_component	CC	ND	3.3105e-7	9.3467e-05	AFUA_8G05040	#N/A	#N/A	#N/A	#N/A	#N/A	#N/A
AFUA_4G10970	conserved hypothetical protein		5.49328	1.27757	4.2998		Uncharacterized protein	GO:0005575	cellular_component	CC	ND	3.3105e-7	9.3467e-05	AFUA_4G10970	#N/A	#N/A	#N/A	#N/A	#N/A	#N/A
AFUA_1G11090	histone-lysine N-methyltransferase Clr4		31.0804	7.22833	4.2998		#N/A	#N/A	#N/A	#N/A	#N/A	#N/A	#N/A	AFUA_1G11090	#N/A	#N/A	#N/A	#N/A	#N/A	#N/A
AFUA_1G04750	cyclin (Pcl1), putative		11.0379	2.56707	4.2998		#N/A	#N/A	#N/A	#N/A	#N/A	#N/A	#N/A	AFUA_1G04750	#N/A	#N/A	#N/A	#N/A	#N/A	#N/A
AFUA_3G14060	palmitoyl-protein thioesterase precursor		14.1444	3.28954	4.2998		Palmitoyl-protein thioesterase	GO:0005575	cellular_component	CC	ND	3.3105e-7	9.3467e-05	AFUA_3G14060	Palmitoyl-protein thioesterase	1.06	lipid, fatty acid and isoprenoid metabolism	Metabolism	4.5362e-06	0.0010864
AFUA_1G16564	DUF455 domain protein		122.707	28.5378	4.2998		DUF455 domain protein	GO:0005575	cellular_component	CC	ND	3.3105e-7	9.3467e-05	AFUA_1G16564	#N/A	#N/A	#N/A	#N/A	#N/A	#N/A
AFUA_3G10680	FAD binding domain protein		16.4607	3.82825	4.2998		FAD binding domain protein	GO:0005575	cellular_component	CC	ND	3.3105e-7	9.3467e-05	AFUA_3G10680	#N/A	#N/A	#N/A	#N/A	#N/A	#N/A
AFUA_6G01840	C6 transcription factor, putative		7.11479	1.65468	4.2998		#N/A	#N/A	#N/A	#N/A	#N/A	#N/A	#N/A	AFUA_6G01840	C6 transcription factor, putative	01.02.07.01	regulation of nitrogen metabolism	Metabolism	0.0024734	0.078984
AFUA_8G07050	conserved hypothetical protein		17.8948	4.16177	4.2998		Uncharacterized protein	GO:0005575	cellular_component	CC	ND	3.3105e-7	9.3467e-05	AFUA_8G07050	#N/A	#N/A	#N/A	#N/A	#N/A	#N/A
AFUA_1G10090	hypothetical protein		143.158	33.2941	4.2998		Uncharacterized protein	GO:0005575	cellular_component	CC	ND	3.3105e-7	9.3467e-05	AFUA_1G10090	#N/A	#N/A	#N/A	#N/A	#N/A	#N/A
AFUA_8G05020	beta-N-acetylhexosaminidase NagA, putative		7.8606	1.82813	4.2998		Beta-hexosaminidase (EC 3.2.1.52)	GO:0008152	metabolic process	BP	IEA	0.0026803	0.41559	AFUA_8G05020	Beta-hexosaminidase (EC 3.2.1.52)	1.05	C-compound and carbohydrate metabolism	Metabolism	2.515e-06	0.0010864
AFUA_2G17330	extracelular serine carboxypeptidase, putative		8.24471	1.91746	4.2998		Extracelular serine carboxypeptidase, putative (EC 3.4.-.-)	GO:0005575	cellular_component	CC	ND	3.3105e-7	9.3467e-05	AFUA_2G17330	Extracelular serine carboxypeptidase, putative (EC 3.4.-.-)	14.13.04	lysosomal and vacuolar protein degradation	Protein fate (folding, modification, destination)	0.0071082	0.2128
AFUA_2G17140	conserved hypothetical protein		6.80723	1.58315	4.2998		Uncharacterized protein	GO:0005575	cellular_component	CC	ND	3.3105e-7	9.3467e-05	AFUA_2G17140	#N/A	#N/A	#N/A	#N/A	#N/A	#N/A
AFUA_1G14730	cell division cycle protein Cdc20, putative		15.2394	3.54422	4.2998		#N/A	#N/A	#N/A	#N/A	#N/A	#N/A	#N/A	AFUA_1G14730	#N/A	#N/A	#N/A	#N/A	#N/A	#N/A
AFUA_1G07730	metalloprotease MEP1		14.5809	3.39107	4.2998		Extracellular metalloprotease AFUA_1G07730 (EC 3.4.24.-)	GO:0005575	cellular_component	CC	ND	3.3105e-7	9.3467e-05	AFUA_1G07730	#N/A	#N/A	#N/A	#N/A	#N/A	#N/A
AFUA_1G14210	nucleoside-diphosphate-sugar epimerase, putative		14.6715	3.41213	4.2998		Nucleoside-diphosphate-sugar epimerase, putative (EC 1.1.1.-)	GO:0055114	oxidation-reduction process	BP	IEA	7.8355e-8	6.6367e-05	AFUA_1G14210	Nucleoside-diphosphate-sugar epimerase, putative (EC 1.1.1.-)	1.05	C-compound and carbohydrate metabolism	Metabolism	2.515e-06	0.0010864
AFUA_2G01800	hypothetical pathogenicity factor		15.3384	3.56723	4.2998		Hypothetical pathogenicity factor	GO:0005575	cellular_component	CC	ND	3.3105e-7	9.3467e-05	AFUA_2G01800	#N/A	#N/A	#N/A	#N/A	#N/A	#N/A
AFUA_2G04880	cell wall biogenesis protein, putative		40.3779	9.39066	4.2998		Cell wall biogenesis protein, putative	GO:0005575	cellular_component	CC	ND	3.3105e-7	9.3467e-05	AFUA_2G04880	Cell wall biogenesis protein, putative	1.05	C-compound and carbohydrate metabolism	Metabolism	2.515e-06	0.0010864
AFUA_2G05230	conserved hypothetical protein		14.8095	3.44422	4.2998		Uncharacterized protein	GO:0005575	cellular_component	CC	ND	3.3105e-7	9.3467e-05	AFUA_2G05230	#N/A	#N/A	#N/A	#N/A	#N/A	#N/A
AFUA_2G12640	integral membrane protein		11.275	2.62221	4.2998		Integral membrane protein	GO:0005575	cellular_component	CC	ND	3.3105e-7	9.3467e-05	AFUA_2G12640	#N/A	#N/A	#N/A	#N/A	#N/A	#N/A
AFUA_3G02090	beta-xylosidase, putative		6.11945	1.4232	4.2998		Probable exo-1,4-beta-xylosidase bxlB (EC 3.2.1.37) (1,4-beta-D-xylan xylohydrolase bxlB) (Beta-xylosidase bxlB) (Xylobiase bxlB)	GO:0008152	metabolic process	BP	IEA	0.0026803	0.41559	AFUA_3G02090	Probable exo-1,4-beta-xylosidase bxlB (EC 3.2.1.37) (1,4-beta-D-xylan xylohydrolase bxlB) (Beta-xylosidase bxlB) (Xylobiase bxlB)	1.05	C-compound and carbohydrate metabolism	Metabolism	2.515e-06	0.0010864
AFUA_6G06730	l-fucose permease, putative		9.96671	2.31795	4.2998		#N/A	#N/A	#N/A	#N/A	#N/A	#N/A	#N/A	AFUA_6G06730	#N/A	#N/A	#N/A	#N/A	#N/A	#N/A
AFUA_6G10210	guanine deaminase, putative		10.2256	2.37815	4.2998		Guanine deaminase, putative (EC 3.5.4.3)	GO:0005575	cellular_component	CC	ND	3.3105e-7	9.3467e-05	AFUA_6G10210	Guanine deaminase, putative (EC 3.5.4.3)	1.02	nitrogen, sulfur and selenium metabolism	Metabolism	0.011195	0.25186
AFUA_7G00770	C6 transcription factor, putative		32.4317	7.54261	4.2998		#N/A	#N/A	#N/A	#N/A	#N/A	#N/A	#N/A	AFUA_7G00770	C6 transcription factor, putative	1.2	secondary metabolism	Metabolism	0.0024405	0.078984
AFUA_8G02610	cytochrome P450 monooxygenase, putative		8.62084	2.00494	4.2998		Cytochrome P450 monooxygenase, putative (EC 1.14.-.-)	GO:0055114	oxidation-reduction process	BP	IEA	7.8355e-8	6.6367e-05	AFUA_8G02610	Cytochrome P450 monooxygenase, putative (EC 1.14.-.-)	1.2	secondary metabolism	Metabolism	0.0024405	0.078984
AFUA_1G17010	glutathione S-transferase, putative		18.2402	4.24211	4.2998		Glutathione S-transferase, putative	GO:0005575	cellular_component	CC	ND	3.3105e-7	9.3467e-05	AFUA_1G17010	Glutathione S-transferase, putative	32.01.01	oxidative stress response	Cell rescue, defense and virulence	0.030979	0.41473
AFUA_3G05575	TBP interacting domain protein, putative		25.2632	5.87544	4.2998		TBP interacting domain protein, putative	GO:0005575	cellular_component	CC	ND	3.3105e-7	9.3467e-05	AFUA_3G05575	#N/A	#N/A	#N/A	#N/A	#N/A	#N/A
AFUA_4G06370	conserved hypothetical protein		34.9942	8.13857	4.2998		Uncharacterized protein	GO:0005575	cellular_component	CC	ND	3.3105e-7	9.3467e-05	AFUA_4G06370	#N/A	#N/A	#N/A	#N/A	#N/A	#N/A
AFUA_3G08890	hypothetical protein		25.399	5.90703	4.2998		Uncharacterized protein	GO:0005575	cellular_component	CC	ND	3.3105e-7	9.3467e-05	AFUA_3G08890	#N/A	#N/A	#N/A	#N/A	#N/A	#N/A
AFUA_5G07320	poly(ADP)-ribose polymerase PARP, putative		13.7133	3.18928	4.2998		#N/A	#N/A	#N/A	#N/A	#N/A	#N/A	#N/A	AFUA_5G07320	Poly(ADP)-ribose polymerase PARP, putative (EC 2.4.2.30)	01.05.02	sugar, glucoside, polyol and carboxylate metabolism	Metabolism	0.013145	0.25186
AFUA_3G07660	conserved hypothetical protein		70.5107	16.3986	4.2998		Uncharacterized protein	GO:0005575	cellular_component	CC	ND	3.3105e-7	9.3467e-05	AFUA_3G07660	#N/A	#N/A	#N/A	#N/A	#N/A	#N/A
AFUA_7G05300	conserved hypothetical protein		9.48638	2.20624	4.2998		Uncharacterized protein	GO:0005575	cellular_component	CC	ND	3.3105e-7	9.3467e-05	AFUA_7G05300	#N/A	#N/A	#N/A	#N/A	#N/A	#N/A
AFUA_1G13560	conserved hypothetical protein		17.4971	4.06928	4.2998		#N/A	#N/A	#N/A	#N/A	#N/A	#N/A	#N/A	AFUA_1G13560	#N/A	#N/A	#N/A	#N/A	#N/A	#N/A
AFUA_6G07860	catabolite repressor protein (CreC), putative		9.01569	2.09677	4.2998		#N/A	#N/A	#N/A	#N/A	#N/A	#N/A	#N/A	AFUA_6G07860	#N/A	#N/A	#N/A	#N/A	#N/A	#N/A
AFUA_3G13450	oxidoreductase, short chain dehydrogenase/reductase family superfamily		72.9609	16.9684	4.2998		Oxidoreductase, short chain dehydrogenase/reductase family superfamily (EC 1.1.1.100)	GO:0055114	oxidation-reduction process	BP	IEA	7.8355e-8	6.6367e-05	AFUA_3G13450	#N/A	#N/A	#N/A	#N/A	#N/A	#N/A
AFUA_2G04590	alcohol dehydrogenase, putative		13.1228	3.05196	4.2998		Alcohol dehydrogenase, putative (EC 1.1.1.-)	GO:0055114	oxidation-reduction process	BP	IEA	7.8355e-8	6.6367e-05	AFUA_2G04590	Alcohol dehydrogenase, putative (EC 1.1.1.-)	1.05	C-compound and carbohydrate metabolism	Metabolism	2.515e-06	0.0010864
AFUA_4G03340	DUF1212 domain membrane protein		32.7691	7.62109	4.2998		DUF1212 domain membrane protein	GO:0005575	cellular_component	CC	ND	3.3105e-7	9.3467e-05	AFUA_4G03340	#N/A	#N/A	#N/A	#N/A	#N/A	#N/A
AFUA_3G08430	mitochondrial phosphate carrier protein, putative		198.791	46.2327	4.2998		#N/A	#N/A	#N/A	#N/A	#N/A	#N/A	#N/A	AFUA_3G08430	Mitochondrial phosphate carrier protein, putative	20.01.01.07	anion transport	Cellular transport, transport facilitation and transport routes	0.047097	0.48136
AFUA_5G02610	cytochrome P450, putative		10.1161	2.35269	4.2998		Cytochrome P450, putative (EC 1.14.-.-)	GO:0055114	oxidation-reduction process	BP	IEA	7.8355e-8	6.6367e-05	AFUA_5G02610	Cytochrome P450, putative (EC 1.14.-.-)	1.05	C-compound and carbohydrate metabolism	Metabolism	2.515e-06	0.0010864
AFUA_2G08180	flotillin domain protein		10.3601	2.40944	4.2998		#N/A	#N/A	#N/A	#N/A	#N/A	#N/A	#N/A	AFUA_2G08180	#N/A	#N/A	#N/A	#N/A	#N/A	#N/A
AFUA_5G09990	C6 transcription factor, putative		8.4968	1.97609	4.2998		#N/A	#N/A	#N/A	#N/A	#N/A	#N/A	#N/A	AFUA_5G09990	#N/A	#N/A	#N/A	#N/A	#N/A	#N/A
AFUA_1G06480	conserved hypothetical protein		7.7829	1.81006	4.2998		#N/A	#N/A	#N/A	#N/A	#N/A	#N/A	#N/A	AFUA_1G06480	#N/A	#N/A	#N/A	#N/A	#N/A	#N/A
AFUA_6G04930	conserved hypothetical protein		64.2751	14.9484	4.2998		Uncharacterized protein	GO:0005575	cellular_component	CC	ND	3.3105e-7	9.3467e-05	AFUA_6G04930	#N/A	#N/A	#N/A	#N/A	#N/A	#N/A
AFUA_7G06090	fatty-acyl coenzyme A oxidase (Pox1), putative		42.4649	9.87602	4.2998		Fatty-acyl coenzyme A oxidase (Pox1), putative (EC 1.3.3.6)	GO:0055114	oxidation-reduction process	BP	IEA	7.8355e-8	6.6367e-05	AFUA_7G06090	Fatty-acyl coenzyme A oxidase (Pox1), putative (EC 1.3.3.6)	1.06	lipid, fatty acid and isoprenoid metabolism	Metabolism	4.5362e-06	0.0010864
AFUA_5G12590	solid-state culture expressed protein (Aos23), putative		106.963	24.8764	4.2998		Solid-state culture expressed protein (Aos23), putative	GO:0005575	cellular_component	CC	ND	3.3105e-7	9.3467e-05	AFUA_5G12590	#N/A	#N/A	#N/A	#N/A	#N/A	#N/A
AFUA_1G10590	GPI anchored protein, putative		13.1961	3.06901	4.2998		GPI anchored protein, putative	GO:0005575	cellular_component	CC	ND	3.3105e-7	9.3467e-05	AFUA_1G10590	#N/A	#N/A	#N/A	#N/A	#N/A	#N/A
AFUA_1G11805	#N/A		157.474	36.6236	4.2998		#N/A	#N/A	#N/A	#N/A	#N/A	#N/A	#N/A	AFUA_1G11805	#N/A	#N/A	#N/A	#N/A	#N/A	#N/A
AFUA_2G04570	BNR/Asp-box repeat domain protein		12.6316	2.93772	4.2998		BNR/Asp-box repeat domain protein	GO:0005575	cellular_component	CC	ND	3.3105e-7	9.3467e-05	AFUA_2G04570	#N/A	#N/A	#N/A	#N/A	#N/A	#N/A
AFUA_3G00520	SIR2 family histone deacetylase, putative		11.6936	2.71957	4.2998		SIR2 family histone deacetylase, putative (EC 3.5.1.-)	GO:0005575	cellular_component	CC	ND	3.3105e-7	9.3467e-05	AFUA_3G00520	SIR2 family histone deacetylase, putative (EC 3.5.1.-)	32.01.01	oxidative stress response	Cell rescue, defense and virulence	0.030979	0.41473
AFUA_4G10380	C2H2 finger domain protein, putative		12.6316	2.93772	4.2998		#N/A	#N/A	#N/A	#N/A	#N/A	#N/A	#N/A	AFUA_4G10380	#N/A	#N/A	#N/A	#N/A	#N/A	#N/A
AFUA_5G07460	conserved hypothetical protein		7.17966	1.66977	4.2998		Uncharacterized protein	GO:0005575	cellular_component	CC	ND	3.3105e-7	9.3467e-05	AFUA_5G07460	#N/A	#N/A	#N/A	#N/A	#N/A	#N/A
AFUA_5G09470	MFS allantoate transporter, putative		8.99851	2.09277	4.2998		#N/A	#N/A	#N/A	#N/A	#N/A	#N/A	#N/A	AFUA_5G09470	#N/A	#N/A	#N/A	#N/A	#N/A	#N/A
AFUA_1G10620	conserved hypothetical protein		135.556	31.7613	4.26795		Uncharacterized protein	GO:0005575	cellular_component	CC	ND	3.3105e-7	9.3467e-05	AFUA_1G10620	#N/A	#N/A	#N/A	#N/A	#N/A	#N/A
AFUA_5G03230	stress response RCI peptide, putative		1056.6	248.095	4.25885		#N/A	#N/A	#N/A	#N/A	#N/A	#N/A	#N/A	AFUA_5G03230	#N/A	#N/A	#N/A	#N/A	#N/A	#N/A
AFUA_5G11760	hydroxymethylbilane synthase, putative		245.88	57.8267	4.25202		#N/A	#N/A	#N/A	#N/A	#N/A	#N/A	#N/A	AFUA_5G11760	#N/A	#N/A	#N/A	#N/A	#N/A	#N/A
AFUA_5G07780	squalene monooxygenase Erg1		280.317	66.1048	4.24049		Squalene monooxygenase Erg1	GO:0055114	oxidation-reduction process	BP	IEA	7.8355e-8	6.6367e-05	AFUA_5G07780	Squalene monooxygenase Erg1	1.06	lipid, fatty acid and isoprenoid metabolism	Metabolism	4.5362e-06	0.0010864
AFUA_7G04390	conserved hypothetical protein		137.432	32.4618	4.23365		Uncharacterized protein	GO:0005575	cellular_component	CC	ND	3.3105e-7	9.3467e-05	AFUA_7G04390	#N/A	#N/A	#N/A	#N/A	#N/A	#N/A
AFUA_2G11100	AMFR protein, putative		230.335	54.662	4.2138		AMFR protein, putative (EC 6.3.2.19)	GO:0005575	cellular_component	CC	ND	3.3105e-7	9.3467e-05	AFUA_2G11100	#N/A	#N/A	#N/A	#N/A	#N/A	#N/A
AFUA_7G00350	conserved hypothetical protein		526.532	125.843	4.18404		Uncharacterized protein	GO:0055114	oxidation-reduction process	BP	IEA	7.8355e-8	6.6367e-05	AFUA_7G00350	Uncharacterized protein	1.02	nitrogen, sulfur and selenium metabolism	Metabolism	0.011195	0.25186
AFUA_5G09230	transaldolase		3439.23	828.256	4.15238		Transaldolase (EC 2.2.1.2)	GO:0005975	carbohydrate metabolic process	BP	IEA	0.0048223	0.45384	AFUA_5G09230	Transaldolase (EC 2.2.1.2)	1.05	C-compound and carbohydrate metabolism	Metabolism	2.515e-06	0.0010864
AFUA_6G09320	LysM domain protein, putative		485.493	117.253	4.14055		#N/A	#N/A	#N/A	#N/A	#N/A	#N/A	#N/A	AFUA_6G09320	#N/A	#N/A	#N/A	#N/A	#N/A	#N/A
AFUA_3G08830	conserved hypothetical protein		60.6317	14.6886	4.12781		Uncharacterized protein	GO:0005575	cellular_component	CC	ND	3.3105e-7	9.3467e-05	AFUA_3G08830	#N/A	#N/A	#N/A	#N/A	#N/A	#N/A
AFUA_2G15770	cell wall biogenesis protein/glutathione transferase (Gto1), putative		362.733	88.4017	4.10324		Cell wall biogenesis protein/glutathione transferase (Gto1), putative	GO:0008152	metabolic process	BP	IEA	0.0026803	0.41559	AFUA_2G15770	#N/A	#N/A	#N/A	#N/A	#N/A	#N/A
AFUA_3G05990	conserved hypothetical protein		74.182	18.1604	4.08481		Uncharacterized protein	GO:0005575	cellular_component	CC	ND	3.3105e-7	9.3467e-05	AFUA_3G05990	#N/A	#N/A	#N/A	#N/A	#N/A	#N/A
AFUA_4G09960	conserved hypothetical protein		93.9897	23.0096	4.08481		Mitochondrial distribution and morphology protein 34	GO:0005575	cellular_component	CC	ND	3.3105e-7	9.3467e-05	AFUA_4G09960	#N/A	#N/A	#N/A	#N/A	#N/A	#N/A
AFUA_2G13310	RING finger domain protein, putative		201.708	49.3801	4.08481		RING finger domain protein, putative	GO:0005575	cellular_component	CC	ND	3.3105e-7	9.3467e-05	AFUA_2G13310	#N/A	#N/A	#N/A	#N/A	#N/A	#N/A
AFUA_6G10390	conserved leucine-rich repeat protein		9.87461	2.4174	4.08481		Conserved leucine-rich repeat protein	GO:0005575	cellular_component	CC	ND	3.3105e-7	9.3467e-05	AFUA_6G10390	#N/A	#N/A	#N/A	#N/A	#N/A	#N/A
AFUA_2G03990	conserved hypothetical protein		109.02	26.8914	4.0541		Uncharacterized protein	GO:0005575	cellular_component	CC	ND	3.3105e-7	9.3467e-05	AFUA_2G03990	#N/A	#N/A	#N/A	#N/A	#N/A	#N/A
AFUA_3G08880	conserved hypothetical protein		166.86	41.2318	4.04687		Uncharacterized protein	GO:0005575	cellular_component	CC	ND	3.3105e-7	9.3467e-05	AFUA_3G08880	#N/A	#N/A	#N/A	#N/A	#N/A	#N/A
AFUA_6G14300	FAD binding domain protein		339.698	84.1838	4.0352		FAD binding domain protein	GO:0055114	oxidation-reduction process	BP	IEA	7.8355e-8	6.6367e-05	AFUA_6G14300	FAD binding domain protein	1.06	lipid, fatty acid and isoprenoid metabolism	Metabolism	4.5362e-06	0.0010864
AFUA_1G14930	conserved hypothetical protein		3718.91	922.914	4.02953		Uncharacterized protein	GO:0005575	cellular_component	CC	ND	3.3105e-7	9.3467e-05	AFUA_1G14930	#N/A	#N/A	#N/A	#N/A	#N/A	#N/A
AFUA_3G08180	Ctr copper transporter family protein		54.4354	13.5643	4.01315		#N/A	#N/A	#N/A	#N/A	#N/A	#N/A	#N/A	AFUA_3G08180	Ctr copper transporter family protein	34.01.01.01	homeostasis of metal ions (Na, K, Ca etc.)	Interaction with the environment	0.0011954	0.067524
AFUA_2G13620	thiamine pyrophosphate enzyme, putative		21.4389	5.34217	4.01315		Thiamine pyrophosphate enzyme, putative (EC 4.1.-.-)	GO:0005575	cellular_component	CC	ND	3.3105e-7	9.3467e-05	AFUA_2G13620	Thiamine pyrophosphate enzyme, putative (EC 4.1.-.-)	1.05	C-compound and carbohydrate metabolism	Metabolism	2.515e-06	0.0010864
AFUA_2G04560	oxidoreductase, short-chain dehydrogenase/reductase family		43.8007	10.9143	4.01315		Oxidoreductase, short-chain dehydrogenase/reductase family	GO:0055114	oxidation-reduction process	BP	IEA	7.8355e-8	6.6367e-05	AFUA_2G04560	Oxidoreductase, short-chain dehydrogenase/reductase family	1.05	C-compound and carbohydrate metabolism	Metabolism	2.515e-06	0.0010864
AFUA_1G13660	phenol 2-monooxygenase, putative		20.1337	5.01693	4.01315		Phenol 2-monooxygenase, putative (EC 1.14.13.7)	GO:0055114	oxidation-reduction process	BP	IEA	7.8355e-8	6.6367e-05	AFUA_1G13660	Phenol 2-monooxygenase, putative (EC 1.14.13.7)	1.2	secondary metabolism	Metabolism	0.0024405	0.078984
AFUA_2G09520	extracellular endoglucanase/cellulase, putative		55.3465	13.7913	4.01315		Extracellular endoglucanase/cellulase, putative (EC 3.-.-.-)	GO:0008152	metabolic process	BP	IEA	0.0026803	0.41559	AFUA_2G09520	Extracellular endoglucanase/cellulase, putative (EC 3.-.-.-)	1.05	C-compound and carbohydrate metabolism	Metabolism	2.515e-06	0.0010864
AFUA_1G06930	conserved hypothetical protein		14.1777	3.53282	4.01315		Uncharacterized protein	GO:0005575	cellular_component	CC	ND	3.3105e-7	9.3467e-05	AFUA_1G06930	#N/A	#N/A	#N/A	#N/A	#N/A	#N/A
AFUA_8G02470	trihydroxytoluene oxygenase		46.4134	11.5653	4.01315		Trihydroxytoluene oxygenase (EC 1.13.-.-)	GO:0055114	oxidation-reduction process	BP	IEA	7.8355e-8	6.6367e-05	AFUA_8G02470	#N/A	#N/A	#N/A	#N/A	#N/A	#N/A
AFUA_1G03680	conserved hypothetical protein		163.674	41.0934	3.98297		#N/A	#N/A	#N/A	#N/A	#N/A	#N/A	#N/A	AFUA_1G03680	#N/A	#N/A	#N/A	#N/A	#N/A	#N/A
AFUA_6G01940	dienelactone hydrolase family protein		424.883	107.107	3.96691		Dienelactone hydrolase family protein	GO:0008152	metabolic process	BP	IEA	0.0026803	0.41559	AFUA_6G01940	#N/A	#N/A	#N/A	#N/A	#N/A	#N/A
AFUA_5G12080	conserved hypothetical protein		76.2506	19.2756	3.95582		#N/A	#N/A	#N/A	#N/A	#N/A	#N/A	#N/A	AFUA_5G12080	#N/A	#N/A	#N/A	#N/A	#N/A	#N/A
AFUA_3G09930	conserved hypothetical protein		90.3593	22.8421	3.95582		Uncharacterized protein	GO:0005575	cellular_component	CC	ND	3.3105e-7	9.3467e-05	AFUA_3G09930	#N/A	#N/A	#N/A	#N/A	#N/A	#N/A
AFUA_2G10400	C6 transcription factor, putative		35.5088	8.97636	3.95582		#N/A	#N/A	#N/A	#N/A	#N/A	#N/A	#N/A	AFUA_2G10400	C6 transcription factor, putative	01.02.07.01	regulation of nitrogen metabolism	Metabolism	0.0024734	0.078984
AFUA_2G05390	Dishevelled, Egl-10, and Pleckstrin domain protein		35.4895	8.97148	3.95582		Vacuolar membrane-associated protein iml1	GO:0005575	cellular_component	CC	ND	3.3105e-7	9.3467e-05	AFUA_2G05390	#N/A	#N/A	#N/A	#N/A	#N/A	#N/A
AFUA_5G08020	HLH DNA binding protein (Penr2), putative		155.224	39.2395	3.95582		#N/A	#N/A	#N/A	#N/A	#N/A	#N/A	#N/A	AFUA_5G08020	#N/A	#N/A	#N/A	#N/A	#N/A	#N/A
AFUA_4G04640	ubiquitin fusion degradation protein (Ufd1), putative		227.902	57.972	3.93125		Ubiquitin fusion degradation protein (Ufd1), putative	GO:0005575	cellular_component	CC	ND	3.3105e-7	9.3467e-05	AFUA_4G04640	#N/A	#N/A	#N/A	#N/A	#N/A	#N/A
AFUA_5G05480	Rheb small monomeric GTPase RhbA		572.937	146.105	3.92142		#N/A	#N/A	#N/A	#N/A	#N/A	#N/A	#N/A	AFUA_5G05480	#N/A	#N/A	#N/A	#N/A	#N/A	#N/A
AFUA_3G03940	2,3-diketo-5-methylthio-1-phosphopentane phosphatase, putative		611.746	156.426	3.91077		2,3-diketo-5-methylthio-1-phosphopentane phosphatase, putative (EC 3.1.3.-)	GO:0005575	cellular_component	CC	ND	3.3105e-7	9.3467e-05	AFUA_3G03940	#N/A	#N/A	#N/A	#N/A	#N/A	#N/A
AFUA_5G11260	siderophore transcription factor SreA		117.458	30.1291	3.89849		Siderophore transcription factor SreA	GO:0005575	cellular_component	CC	ND	3.3105e-7	9.3467e-05	AFUA_5G11260	Siderophore transcription factor SreA	34.01.01.01	homeostasis of metal ions (Na, K, Ca etc.)	Interaction with the environment	0.0011954	0.067524
AFUA_6G07520	cell wall integrity signaling protein Lsp1/Pil1, putative		377.938	97.314	3.88369		#N/A	#N/A	#N/A	#N/A	#N/A	#N/A	#N/A	AFUA_6G07520	#N/A	#N/A	#N/A	#N/A	#N/A	#N/A
AFUA_5G11250	polyglutamate biosynthesis protein, putative		62.3736	16.1179	3.86982		Polyglutamate biosynthesis protein, putative	GO:0005575	cellular_component	CC	ND	3.3105e-7	9.3467e-05	AFUA_5G11250	#N/A	#N/A	#N/A	#N/A	#N/A	#N/A
AFUA_8G02460	MFS transporter, putative		19.0237	4.91591	3.86982		#N/A	#N/A	#N/A	#N/A	#N/A	#N/A	#N/A	AFUA_8G02460	MFS transporter, putative	1.2	secondary metabolism	Metabolism	0.0024405	0.078984
AFUA_4G09180	SET domain protein		138.646	35.8274	3.86982		SET domain protein	GO:0005575	cellular_component	CC	ND	3.3105e-7	9.3467e-05	AFUA_4G09180	#N/A	#N/A	#N/A	#N/A	#N/A	#N/A
AFUA_8G02510	glycosyl hydrolase family 43 protein		18.2873	4.72562	3.86982		Glycosyl hydrolase family 43 protein	GO:0005575	cellular_component	CC	ND	3.3105e-7	9.3467e-05	AFUA_8G02510	#N/A	#N/A	#N/A	#N/A	#N/A	#N/A
AFUA_5G11530	hypothetical protein		51.5369	13.3177	3.86982		Uncharacterized protein	GO:0005575	cellular_component	CC	ND	3.3105e-7	9.3467e-05	AFUA_5G11530	#N/A	#N/A	#N/A	#N/A	#N/A	#N/A
AFUA_1G02530	MFS sugar transporter, putative		16.8722	4.35995	3.86982		#N/A	#N/A	#N/A	#N/A	#N/A	#N/A	#N/A	AFUA_1G02530	MFS sugar transporter, putative	1.05	C-compound and carbohydrate metabolism	Metabolism	2.515e-06	0.0010864
AFUA_2G12970	peroxisomal membrane anchor protein, putative		40.3971	10.439	3.86982		#N/A	#N/A	#N/A	#N/A	#N/A	#N/A	#N/A	AFUA_2G12970	#N/A	#N/A	#N/A	#N/A	#N/A	#N/A
AFUA_6G14100	mitochondrial carnitine:acyl carnitine carrier, putative		26.0049	6.71992	3.86982		#N/A	#N/A	#N/A	#N/A	#N/A	#N/A	#N/A	AFUA_6G14100	Mitochondrial carnitine:acyl carnitine carrier, putative	1.06	lipid, fatty acid and isoprenoid metabolism	Metabolism	4.5362e-06	0.0010864
AFUA_1G13230	conserved hypothetical protein		28.4719	7.35741	3.86982		Uncharacterized protein	GO:0005575	cellular_component	CC	ND	3.3105e-7	9.3467e-05	AFUA_1G13230	#N/A	#N/A	#N/A	#N/A	#N/A	#N/A
AFUA_5G06500	acyl-CoA dehydrogenase family protein		18.1313	4.68532	3.86982		Acyl-CoA dehydrogenase family protein (EC 1.3.99.-)	GO:0055114	oxidation-reduction process	BP	IEA	7.8355e-8	6.6367e-05	AFUA_5G06500	Acyl-CoA dehydrogenase family protein (EC 1.3.99.-)	1.06	lipid, fatty acid and isoprenoid metabolism	Metabolism	4.5362e-06	0.0010864
AFUA_3G14670	MFS transporter, putative		38.3045	9.89826	3.86982		#N/A	#N/A	#N/A	#N/A	#N/A	#N/A	#N/A	AFUA_3G14670	MFS transporter, putative	1.2	secondary metabolism	Metabolism	0.0024405	0.078984
AFUA_2G01770	GMC oxidoreductase		14.1727	3.66236	3.86982		GMC oxidoreductase (EC 1.1.99.1)	GO:0055114	oxidation-reduction process	BP	IEA	7.8355e-8	6.6367e-05	AFUA_2G01770	GMC oxidoreductase (EC 1.1.99.1)	1.05	C-compound and carbohydrate metabolism	Metabolism	2.515e-06	0.0010864
AFUA_1G14660	regulator of secondary metabolism LaeA		22.7369	5.87544	3.86982		#N/A	#N/A	#N/A	#N/A	#N/A	#N/A	#N/A	AFUA_1G14660	Regulator of secondary metabolism LaeA	1.2	secondary metabolism	Metabolism	0.0024405	0.078984
AFUA_6G00520	conserved hypothetical protein		38.7407	10.011	3.86982		Putative uncharacterized protein	GO:0005575	cellular_component	CC	ND	3.3105e-7	9.3467e-05	AFUA_6G00520	#N/A	#N/A	#N/A	#N/A	#N/A	#N/A
AFUA_1G06000	Ser/Thr protein phosphatase family protein		22.9207	5.92295	3.86982		Ser/Thr protein phosphatase family protein	GO:0005575	cellular_component	CC	ND	3.3105e-7	9.3467e-05	AFUA_1G06000	#N/A	#N/A	#N/A	#N/A	#N/A	#N/A
AFUA_3G09760	peptidyl-tRNA hydrolase domain protein		41.8896	10.8247	3.86982		#N/A	#N/A	#N/A	#N/A	#N/A	#N/A	#N/A	AFUA_3G09760	#N/A	#N/A	#N/A	#N/A	#N/A	#N/A
AFUA_4G07900	conserved hypothetical protein		17.9023	4.62613	3.86982		#N/A	#N/A	#N/A	#N/A	#N/A	#N/A	#N/A	AFUA_4G07900	#N/A	#N/A	#N/A	#N/A	#N/A	#N/A
AFUA_7G05590	DUF890 domain protein		177.158	45.7794	3.86982		#N/A	#N/A	#N/A	#N/A	#N/A	#N/A	#N/A	AFUA_7G05590	#N/A	#N/A	#N/A	#N/A	#N/A	#N/A
AFUA_8G05380	#N/A		6.97016	1.80116	3.86982		Uncharacterized protein	GO:0005575	cellular_component	CC	ND	3.3105e-7	9.3467e-05	AFUA_8G05380	#N/A	#N/A	#N/A	#N/A	#N/A	#N/A
AFUA_6G00470	plasma membrane zinc ion transporter, putative		31.9084	8.24545	3.86982		#N/A	#N/A	#N/A	#N/A	#N/A	#N/A	#N/A	AFUA_6G00470	Plasma membrane zinc ion transporter, putative	34.01.01.01	homeostasis of metal ions (Na, K, Ca etc.)	Interaction with the environment	0.0011954	0.067524
AFUA_1G09910	MFS sugar transporter, putative		15.5743	4.02457	3.86982		#N/A	#N/A	#N/A	#N/A	#N/A	#N/A	#N/A	AFUA_1G09910	MFS sugar transporter, putative	1.2	secondary metabolism	Metabolism	0.0024405	0.078984
AFUA_2G12510	hypothetical protein		24.4356	6.31441	3.86982		Uncharacterized protein	GO:0005575	cellular_component	CC	ND	3.3105e-7	9.3467e-05	AFUA_2G12510	#N/A	#N/A	#N/A	#N/A	#N/A	#N/A
AFUA_2G09500	universal stress protein family domain protein		168.573	43.5611	3.86982		Universal stress protein family domain protein	GO:0005575	cellular_component	CC	ND	3.3105e-7	9.3467e-05	AFUA_2G09500	#N/A	#N/A	#N/A	#N/A	#N/A	#N/A
AFUA_2G11340	ML domain protein, putative		185.933	48.5372	3.83073		#N/A	#N/A	#N/A	#N/A	#N/A	#N/A	#N/A	AFUA_2G11340	Phosphatidylglycerol/phosphatidylinositol transfer protein (PG/PI-TP)	20.09.16	cellular export and secretion	Cellular transport, transport facilitation and transport routes	0.00089546	0.066362
AFUA_3G01290	AMID-like mitochondrial oxidoreductase, putative		120.881	31.5555	3.83073		AMID-like mitochondrial oxidoreductase, putative (EC 1.-.-.-)	GO:0055114	oxidation-reduction process	BP	IEA	7.8355e-8	6.6367e-05	AFUA_3G01290	AMID-like mitochondrial oxidoreductase, putative (EC 1.-.-.-)	32.01.01	oxidative stress response	Cell rescue, defense and virulence	0.030979	0.41473
AFUA_5G13500	RING finger domain protein, putative		114.181	29.8742	3.82204		RING finger domain protein, putative	GO:0005575	cellular_component	CC	ND	3.3105e-7	9.3467e-05	AFUA_5G13500	#N/A	#N/A	#N/A	#N/A	#N/A	#N/A
AFUA_3G11060	THUMP domain protein		141.021	36.8969	3.82204		#N/A	#N/A	#N/A	#N/A	#N/A	#N/A	#N/A	AFUA_3G11060	#N/A	#N/A	#N/A	#N/A	#N/A	#N/A
AFUA_7G01790	MFS transporter, putative		380.457	99.6161	3.81923		#N/A	#N/A	#N/A	#N/A	#N/A	#N/A	#N/A	AFUA_7G01790	MFS transporter, putative	1.05	C-compound and carbohydrate metabolism	Metabolism	2.515e-06	0.0010864
AFUA_4G08790	dienelactone hydrolase family protein		73.7112	19.4806	3.78382		Dienelactone hydrolase family protein	GO:0005575	cellular_component	CC	ND	3.3105e-7	9.3467e-05	AFUA_4G08790	#N/A	#N/A	#N/A	#N/A	#N/A	#N/A
AFUA_1G13290	SAGA complex component (Sgf29), putative		44.2267	11.6884	3.78382		#N/A	#N/A	#N/A	#N/A	#N/A	#N/A	#N/A	AFUA_1G13290	#N/A	#N/A	#N/A	#N/A	#N/A	#N/A
AFUA_3G12500	conserved hypothetical protein		83.2986	22.1402	3.76232		Uncharacterized protein	GO:0005575	cellular_component	CC	ND	3.3105e-7	9.3467e-05	AFUA_3G12500	#N/A	#N/A	#N/A	#N/A	#N/A	#N/A
AFUA_8G01730	glycosyl transferase family protein		380.845	101.419	3.75516		Glycosyl transferase family protein	GO:0005575	cellular_component	CC	ND	3.3105e-7	9.3467e-05	AFUA_8G01730	Glycosyl transferase family protein	1.05	C-compound and carbohydrate metabolism	Metabolism	2.515e-06	0.0010864
AFUA_1G13510	C6 transcription factor FacB/Cat8		66.785	17.8237	3.74697		#N/A	#N/A	#N/A	#N/A	#N/A	#N/A	#N/A	AFUA_1G13510	C6 transcription factor FacB/Cat8	1.2	secondary metabolism	Metabolism	0.0024405	0.078984
AFUA_1G10360	conserved hypothetical protein		209.531	55.9947	3.74199		#N/A	#N/A	#N/A	#N/A	#N/A	#N/A	#N/A	AFUA_1G10360	#N/A	#N/A	#N/A	#N/A	#N/A	#N/A
AFUA_8G00780	conserved hypothetical protein		13.165	3.53282	3.72649		Uncharacterized protein	GO:0005575	cellular_component	CC	ND	3.3105e-7	9.3467e-05	AFUA_8G00780	#N/A	#N/A	#N/A	#N/A	#N/A	#N/A
AFUA_4G02880	conserved hypothetical protein		68.6199	18.4141	3.72649		Uncharacterized protein	GO:0005575	cellular_component	CC	ND	3.3105e-7	9.3467e-05	AFUA_4G02880	#N/A	#N/A	#N/A	#N/A	#N/A	#N/A
AFUA_1G08890	hypothetical protein		50.34	13.5087	3.72649		Uncharacterized protein	GO:0005575	cellular_component	CC	ND	3.3105e-7	9.3467e-05	AFUA_1G08890	#N/A	#N/A	#N/A	#N/A	#N/A	#N/A
AFUA_3G08860	transcriptional regulator, putative		69.3953	18.6221	3.72649		Transcriptional regulator, putative	GO:0005575	cellular_component	CC	ND	3.3105e-7	9.3467e-05	AFUA_3G08860	#N/A	#N/A	#N/A	#N/A	#N/A	#N/A
AFUA_2G05190	MFS monosaccharide transporter, putative		43.9462	11.7929	3.72649		#N/A	#N/A	#N/A	#N/A	#N/A	#N/A	#N/A	AFUA_2G05190	MFS monosaccharide transporter, putative	1.05	C-compound and carbohydrate metabolism	Metabolism	2.515e-06	0.0010864
AFUA_3G00670	DUF1275 domain protein		51.179	13.7338	3.72649		DUF1275 domain protein	GO:0005575	cellular_component	CC	ND	3.3105e-7	9.3467e-05	AFUA_3G00670	#N/A	#N/A	#N/A	#N/A	#N/A	#N/A
AFUA_6G05020	acetamidase		22.4142	6.01482	3.72649		Acetamidase	GO:0005575	cellular_component	CC	ND	3.3105e-7	9.3467e-05	AFUA_6G05020	Acetamidase	1.06	lipid, fatty acid and isoprenoid metabolism	Metabolism	4.5362e-06	0.0010864
AFUA_2G17600	conidial pigment polyketide synthase PksP/Alb1		11.442	3.07044	3.72649		Conidial pigment polyketide synthase PksP/Alb1	GO:0005575	cellular_component	CC	ND	3.3105e-7	9.3467e-05	AFUA_2G17600	Conidial pigment polyketide synthase PksP/Alb1	1.2	secondary metabolism	Metabolism	0.0024405	0.078984
AFUA_5G10950	conserved hypothetical protein		36.448	9.78077	3.72649		Uncharacterized protein	GO:0005575	cellular_component	CC	ND	3.3105e-7	9.3467e-05	AFUA_5G10950	#N/A	#N/A	#N/A	#N/A	#N/A	#N/A
AFUA_1G14490	aminotransferase, putative		82.436	22.1216	3.72649		#N/A	#N/A	#N/A	#N/A	#N/A	#N/A	#N/A	AFUA_1G14490	Aminotransferase, putative	1.02	nitrogen, sulfur and selenium metabolism	Metabolism	0.011195	0.25186
AFUA_6G06510	extracellular triacylglycerol lipase, putative		29.9585	8.03932	3.72649		Extracellular triacylglycerol lipase, putative (EC 3.1.1.3)	GO:0005575	cellular_component	CC	ND	3.3105e-7	9.3467e-05	AFUA_6G06510	Extracellular triacylglycerol lipase, putative (EC 3.1.1.3)	1.06	lipid, fatty acid and isoprenoid metabolism	Metabolism	4.5362e-06	0.0010864
AFUA_3G00330	NAD dependent epimerase/dehydratase family protein		263.492	71.1838	3.70157		NAD dependent epimerase/dehydratase family protein	GO:0008152	metabolic process	BP	IEA	0.0026803	0.41559	AFUA_3G00330	#N/A	#N/A	#N/A	#N/A	#N/A	#N/A
AFUA_2G16420	conserved hypothetical protein		27.8849	7.54088	3.69783		Uncharacterized protein	GO:0005575	cellular_component	CC	ND	3.3105e-7	9.3467e-05	AFUA_2G16420	#N/A	#N/A	#N/A	#N/A	#N/A	#N/A
AFUA_1G04820	D-xylose reductase (Xyl1), putative		128.571	34.7692	3.69783		Probable NAD(P)H-dependent D-xylose reductase xyl1 (XR) (EC 1.1.1.307)	GO:0055114	oxidation-reduction process	BP	IEA	7.8355e-8	6.6367e-05	AFUA_1G04820	Probable NAD(P)H-dependent D-xylose reductase xyl1 (XR) (EC 1.1.1.307)	1.05	C-compound and carbohydrate metabolism	Metabolism	2.515e-06	0.0010864
AFUA_1G06110	conserved hypothetical protein		329.597	89.4296	3.68554		Uncharacterized protein	GO:0008152	metabolic process	BP	IEA	0.0026803	0.41559	AFUA_1G06110	#N/A	#N/A	#N/A	#N/A	#N/A	#N/A
AFUA_4G12050	thermoresistant gluconokinase family protein		68.6425	18.7813	3.65483		Thermoresistant gluconokinase family protein (EC 2.7.1.12)	GO:0005975	carbohydrate metabolic process	BP	IEA	0.0048223	0.45384	AFUA_4G12050	Thermoresistant gluconokinase family protein (EC 2.7.1.12)	1.05	C-compound and carbohydrate metabolism	Metabolism	2.515e-06	0.0010864
AFUA_4G09240	conserved hypothetical protein		41.2914	11.2978	3.65483		Uncharacterized protein	GO:0005575	cellular_component	CC	ND	3.3105e-7	9.3467e-05	AFUA_4G09240	#N/A	#N/A	#N/A	#N/A	#N/A	#N/A
AFUA_1G07750	SWIRM domain protein Fun19, putative		212.465	58.1326	3.65483		#N/A	#N/A	#N/A	#N/A	#N/A	#N/A	#N/A	AFUA_1G07750	#N/A	#N/A	#N/A	#N/A	#N/A	#N/A
AFUA_5G09940	MFS transporter of unkown specificity		31.189	8.53364	3.65483		#N/A	#N/A	#N/A	#N/A	#N/A	#N/A	#N/A	AFUA_5G09940	MFS transporter of unkown specificity	32.07	detoxification	Cell rescue, defense and virulence	8.7992e-06	0.0014049
AFUA_1G04970	Patatin-like serine hydrolase, putative		67.5835	18.4916	3.65483		Patatin-like phospholipase domain-containing protein AFUA_1G04970 (EC 3.1.1.-)	GO:0005575	cellular_component	CC	ND	3.3105e-7	9.3467e-05	AFUA_1G04970	Patatin-like phospholipase domain-containing protein AFUA_1G04970 (EC 3.1.1.-)	1.06	lipid, fatty acid and isoprenoid metabolism	Metabolism	4.5362e-06	0.0010864
AFUA_5G09200	ubiquitin conjugating enzyme (UbcC), putative		295.777	81.2088	3.64218		Ubiquitin conjugating enzyme (UbcC), putative (EC 6.3.2.19)	GO:0008152	metabolic process	BP	IEA	0.0026803	0.41559	AFUA_5G09200	#N/A	#N/A	#N/A	#N/A	#N/A	#N/A
AFUA_5G02020	aldehyde reductase (GliO), putative		111.851	30.8049	3.63094		Aldehyde reductase (GliO), putative (EC 1.1.1.-)	GO:0055114	oxidation-reduction process	BP	IEA	7.8355e-8	6.6367e-05	AFUA_5G02020	Aldehyde reductase (GliO), putative (EC 1.1.1.-)	1.05	C-compound and carbohydrate metabolism	Metabolism	2.515e-06	0.0010864
AFUA_7G05800	fructose-2,6-bisphosphatase		79.0838	21.7805	3.63094		Fructose-2,6-bisphosphatase	GO:0008152	metabolic process	BP	IEA	0.0026803	0.41559	AFUA_7G05800	Fructose-2,6-bisphosphatase	1.05	C-compound and carbohydrate metabolism	Metabolism	2.515e-06	0.0010864
AFUA_6G04960	ankyrin repeat protein		17.8112	4.93136	3.61183		Ankyrin repeat protein	GO:0005575	cellular_component	CC	ND	3.3105e-7	9.3467e-05	AFUA_6G04960	#N/A	#N/A	#N/A	#N/A	#N/A	#N/A
AFUA_4G07870	2-hydroxychromene-2-carboxylate isomerase, putative		89.7815	24.8576	3.61183		2-hydroxychromene-2-carboxylate isomerase, putative	GO:0055114	oxidation-reduction process	BP	IEA	7.8355e-8	6.6367e-05	AFUA_4G07870	2-hydroxychromene-2-carboxylate isomerase, putative	32.07	detoxification	Cell rescue, defense and virulence	8.7992e-06	0.0014049
AFUA_2G12500	MFS multidrug transporter, putative		36.1416	10.0064	3.61183		#N/A	#N/A	#N/A	#N/A	#N/A	#N/A	#N/A	AFUA_2G12500	MFS multidrug transporter, putative	32.07	detoxification	Cell rescue, defense and virulence	8.7992e-06	0.0014049
AFUA_8G05720	DUF567 domain protein		100.211	27.7451	3.61183		DUF567 domain protein	GO:0005575	cellular_component	CC	ND	3.3105e-7	9.3467e-05	AFUA_8G05720	#N/A	#N/A	#N/A	#N/A	#N/A	#N/A
AFUA_8G07190	conserved hypothetical protein		108.425	30.0193	3.61183		Uncharacterized protein	GO:0005575	cellular_component	CC	ND	3.3105e-7	9.3467e-05	AFUA_8G07190	#N/A	#N/A	#N/A	#N/A	#N/A	#N/A
AFUA_4G10010	Hsp90 co-chaperone Cdc37		300.104	83.3036	3.60254		#N/A	#N/A	#N/A	#N/A	#N/A	#N/A	#N/A	AFUA_4G10010	#N/A	#N/A	#N/A	#N/A	#N/A	#N/A
AFUA_1G02340	conserved hypothetical protein		97.6692	27.159	3.5962		Uncharacterized protein	GO:0005575	cellular_component	CC	ND	3.3105e-7	9.3467e-05	AFUA_1G02340	#N/A	#N/A	#N/A	#N/A	#N/A	#N/A
AFUA_3G03370	cell surface protein, putative		126.316	35.2526	3.58317		Cell surface protein, putative	GO:0005575	cellular_component	CC	ND	3.3105e-7	9.3467e-05	AFUA_3G03370	#N/A	#N/A	#N/A	#N/A	#N/A	#N/A
AFUA_5G12730	nonribosomal peptide synthase, putative		8.32119	2.3223	3.58317		Nonribosomal peptide synthetase 8 (EC 6.3.2.-)	GO:0005575	cellular_component	CC	ND	3.3105e-7	9.3467e-05	AFUA_5G12730	Nonribosomal peptide synthetase 8 (EC 6.3.2.-)	1.2	secondary metabolism	Metabolism	0.0024405	0.078984
AFUA_6G13380	arrestin (or S-antigen), N-terminal domain protein		160.55	45.0641	3.56269		Arrestin (Or S-antigen), N-terminal domain protein	GO:0005575	cellular_component	CC	ND	3.3105e-7	9.3467e-05	AFUA_6G13380	#N/A	#N/A	#N/A	#N/A	#N/A	#N/A
AFUA_7G01620	hypothetical protein		144.976	40.6928	3.56269		#N/A	#N/A	#N/A	#N/A	#N/A	#N/A	#N/A	AFUA_7G01620	Uncharacterized protein	1.06	lipid, fatty acid and isoprenoid metabolism	Metabolism	4.5362e-06	0.0010864
AFUA_1G11220	GPI anchored protein, putative		207.866	58.5977	3.54733		GPI anchored protein, putative	GO:0005575	cellular_component	CC	ND	3.3105e-7	9.3467e-05	AFUA_1G11220	#N/A	#N/A	#N/A	#N/A	#N/A	#N/A
AFUA_5G03370	conserved hypothetical protein		30.6989	8.72619	3.51802		#N/A	#N/A	#N/A	#N/A	#N/A	#N/A	#N/A	AFUA_5G03370	#N/A	#N/A	#N/A	#N/A	#N/A	#N/A
AFUA_3G10480	meiotic sister chromatid recombination protein Ish1/Msc1, putative		410.725	116.84	3.51527		#N/A	#N/A	#N/A	#N/A	#N/A	#N/A	#N/A	AFUA_3G10480	Meiotic sister chromatid recombination protein Ish1/Msc1, putative	32.05.01.03	chemical agent resistance	Cell rescue, defense and virulence	0.02846	0.40095
AFUA_3G12350	stress response RCI peptide, putative		2329.53	663.013	3.51355		#N/A	#N/A	#N/A	#N/A	#N/A	#N/A	#N/A	AFUA_3G12350	#N/A	#N/A	#N/A	#N/A	#N/A	#N/A
AFUA_4G14380	glutathione S-transferase, putative		2052.47	584.331	3.51251		Glutathione S-transferase, putative	GO:0005575	cellular_component	CC	ND	3.3105e-7	9.3467e-05	AFUA_4G14380	#N/A	#N/A	#N/A	#N/A	#N/A	#N/A
AFUA_2G02470	PA and RING finger domain protein		166.284	47.3801	3.50957		PA and RING finger domain protein	GO:0005575	cellular_component	CC	ND	3.3105e-7	9.3467e-05	AFUA_2G02470	#N/A	#N/A	#N/A	#N/A	#N/A	#N/A
AFUA_5G00790	ABC multidrug transporter, putative		36.587	10.4497	3.50127		#N/A	#N/A	#N/A	#N/A	#N/A	#N/A	#N/A	AFUA_5G00790	ABC multidrug transporter, putative	32.07	detoxification	Cell rescue, defense and virulence	8.7992e-06	0.0014049
AFUA_5G07450	conserved hypothetical protein		440.927	125.985	3.49984		Uncharacterized protein	GO:0005575	cellular_component	CC	ND	3.3105e-7	9.3467e-05	AFUA_5G07450	#N/A	#N/A	#N/A	#N/A	#N/A	#N/A
AFUA_4G06400	pH signal transduction protein PalA, putative		265.914	76.3174	3.48432		#N/A	#N/A	#N/A	#N/A	#N/A	#N/A	#N/A	AFUA_4G06400	pH signal transduction protein PalA, putative	43.01.03.09	development of asco- basidio- or zygospore	Cell type differentiation	0.035951	0.41473
AFUA_2G14110	sulfur metabolite repression control protein SconB, putative		109.803	31.5267	3.48284		Probable E3 ubiquitin ligase complex SCF subunit sconB (Sulfur controller B) (Sulfur metabolite repression control protein B)	GO:0005575	cellular_component	CC	ND	3.3105e-7	9.3467e-05	AFUA_2G14110	#N/A	#N/A	#N/A	#N/A	#N/A	#N/A
AFUA_1G14830	conserved hypothetical protein		182.934	52.6327	3.47567		Uncharacterized protein	GO:0005575	cellular_component	CC	ND	3.3105e-7	9.3467e-05	AFUA_1G14830	#N/A	#N/A	#N/A	#N/A	#N/A	#N/A
AFUA_1G02660	F-box domain protein		10.2145	2.96948	3.43984		F-box domain protein	GO:0005575	cellular_component	CC	ND	3.3105e-7	9.3467e-05	AFUA_1G02660	#N/A	#N/A	#N/A	#N/A	#N/A	#N/A
AFUA_1G14860	bZIP transcription factor, putative		12.6401	3.6746	3.43984		BZIP transcription factor, putative	GO:0005575	cellular_component	CC	ND	3.3105e-7	9.3467e-05	AFUA_1G14860	#N/A	#N/A	#N/A	#N/A	#N/A	#N/A
AFUA_2G00600	conserved hypothetical protein		18.9918	5.52114	3.43984		Uncharacterized protein	GO:0005575	cellular_component	CC	ND	3.3105e-7	9.3467e-05	AFUA_2G00600	#N/A	#N/A	#N/A	#N/A	#N/A	#N/A
AFUA_2G11220	proline permease, putative		7.5739	2.20182	3.43984		#N/A	#N/A	#N/A	#N/A	#N/A	#N/A	#N/A	AFUA_2G11220	#N/A	#N/A	#N/A	#N/A	#N/A	#N/A
AFUA_2G13560	hypothetical protein		14.8794	4.32562	3.43984		Uncharacterized protein	GO:0005575	cellular_component	CC	ND	3.3105e-7	9.3467e-05	AFUA_2G13560	#N/A	#N/A	#N/A	#N/A	#N/A	#N/A
AFUA_3G14330	mating-type alpha-pheromone receptor PreB		10.2145	2.96948	3.43984		#N/A	#N/A	#N/A	#N/A	#N/A	#N/A	#N/A	AFUA_3G14330	#N/A	#N/A	#N/A	#N/A	#N/A	#N/A
AFUA_5G03100	cytochrome P450 monooxygenase SirB-like, putative		6.55004	1.90417	3.43984		Cytochrome P450 monooxygenase SirB-like, putative	GO:0055114	oxidation-reduction process	BP	IEA	7.8355e-8	6.6367e-05	AFUA_5G03100	Cytochrome P450 monooxygenase SirB-like, putative	1.06	lipid, fatty acid and isoprenoid metabolism	Metabolism	4.5362e-06	0.0010864
AFUA_6G07070	cellobiohydrolase celD		8.34299	2.4254	3.43984		Probable 1,4-beta-D-glucan cellobiohydrolase A (EC 3.2.1.91) (Beta-glucancellobiohydrolase A) (Cellobiohydrolase D) (Exocellobiohydrolase A) (Exoglucanase A)	GO:0005575	cellular_component	CC	ND	3.3105e-7	9.3467e-05	AFUA_6G07070	Probable 1,4-beta-D-glucan cellobiohydrolase A (EC 3.2.1.91) (Beta-glucancellobiohydrolase A) (Cellobiohydrolase D) (Exocellobiohydrolase A) (Exoglucanase A)	01.05.03	polysaccharide metabolism	Metabolism	0.012778	0.25186
AFUA_7G06320	C6 transcription factor, putative		12.8332	3.73075	3.43984		#N/A	#N/A	#N/A	#N/A	#N/A	#N/A	#N/A	AFUA_7G06320	#N/A	#N/A	#N/A	#N/A	#N/A	#N/A
AFUA_4G12040	lanosterol synthase, putative		42.2277	12.2761	3.43984		Lanosterol synthase, putative	GO:0005575	cellular_component	CC	ND	3.3105e-7	9.3467e-05	AFUA_4G12040	Lanosterol synthase, putative	1.06	lipid, fatty acid and isoprenoid metabolism	Metabolism	4.5362e-06	0.0010864
AFUA_4G06850	coenzyme A synthetase, putative		21.3927	6.21909	3.43984		Coenzyme A synthetase, putative (EC 6.2.1.3)	GO:0008152	metabolic process	BP	IEA	0.0026803	0.41559	AFUA_4G06850	Coenzyme A synthetase, putative (EC 6.2.1.3)	1.06	lipid, fatty acid and isoprenoid metabolism	Metabolism	4.5362e-06	0.0010864
AFUA_6G12670	beta-alanine synthase, putative		7.51367	2.18431	3.43984		Beta-alanine synthase, putative (EC 3.5.1.-)	GO:0005575	cellular_component	CC	ND	3.3105e-7	9.3467e-05	AFUA_6G12670	#N/A	#N/A	#N/A	#N/A	#N/A	#N/A
AFUA_6G06680	MFS transporter, putative		6.76096	1.96549	3.43984		#N/A	#N/A	#N/A	#N/A	#N/A	#N/A	#N/A	AFUA_6G06680	MFS transporter, putative	32.07	detoxification	Cell rescue, defense and virulence	8.7992e-06	0.0014049
AFUA_7G04010	conserved hypothetical protein		5.9895	1.74122	3.43984		Uncharacterized protein	GO:0005575	cellular_component	CC	ND	3.3105e-7	9.3467e-05	AFUA_7G04010	#N/A	#N/A	#N/A	#N/A	#N/A	#N/A
AFUA_6G14070	extracellular glycine/serine-rich protein, putative		31.3641	9.1179	3.43984		Extracellular glycine/serine-rich protein, putative	GO:0005575	cellular_component	CC	ND	3.3105e-7	9.3467e-05	AFUA_6G14070	#N/A	#N/A	#N/A	#N/A	#N/A	#N/A
AFUA_8G01970	extracellular endo-polygalacturonase, putative		10.3545	3.01016	3.43984		Probable endopolygalacturonase B (EC 3.2.1.15) (Pectinase B) (Polygalacturonase B)	GO:0005575	cellular_component	CC	ND	3.3105e-7	9.3467e-05	AFUA_8G01970	Probable endopolygalacturonase B (EC 3.2.1.15) (Pectinase B) (Polygalacturonase B)	1.05	C-compound and carbohydrate metabolism	Metabolism	2.515e-06	0.0010864
AFUA_1G09900	alpha-L-arabinofuranosidase		52.8056	15.3512	3.43984		Probable alpha-L-arabinofuranosidase C (ABF C) (Arabinosidase C) (EC 3.2.1.55)	GO:0005575	cellular_component	CC	ND	3.3105e-7	9.3467e-05	AFUA_1G09900	Probable alpha-L-arabinofuranosidase C (ABF C) (Arabinosidase C) (EC 3.2.1.55)	1.05	C-compound and carbohydrate metabolism	Metabolism	2.515e-06	0.0010864
AFUA_5G12780	Kelch repeat protein		45.3979	13.1977	3.43984		Kelch repeat protein	GO:0005575	cellular_component	CC	ND	3.3105e-7	9.3467e-05	AFUA_5G12780	#N/A	#N/A	#N/A	#N/A	#N/A	#N/A
AFUA_3G15190	periplasmic nitrate reductase, putative		3.99934	1.16265	3.43984		Periplasmic nitrate reductase, putative (EC 1.7.99.4) (Fragment)	GO:0055114	oxidation-reduction process	BP	IEA	7.8355e-8	6.6367e-05	AFUA_3G15190	Periplasmic nitrate reductase, putative (EC 1.7.99.4) (Fragment)	16.21.03	molybdopterin binding	Protein with binding function or cofactor requirement (structural or analytic)	0.0024107	0.078984
AFUA_2G00980	conserved hypothetical protein		18.8969	5.49353	3.43984		Uncharacterized protein	GO:0005575	cellular_component	CC	ND	3.3105e-7	9.3467e-05	AFUA_2G00980	#N/A	#N/A	#N/A	#N/A	#N/A	#N/A
AFUA_2G13500	conserved hypothetical protein		7.82479	2.27476	3.43984		Uncharacterized protein	GO:0005575	cellular_component	CC	ND	3.3105e-7	9.3467e-05	AFUA_2G13500	#N/A	#N/A	#N/A	#N/A	#N/A	#N/A
AFUA_5G03960	class V chitinase Chi100		2.65219	0.771022	3.43984		Class V chitinase Chi100 (EC 3.2.1.14)	GO:0005575	cellular_component	CC	ND	3.3105e-7	9.3467e-05	AFUA_5G03960	Class V chitinase Chi100 (EC 3.2.1.14)	1.05	C-compound and carbohydrate metabolism	Metabolism	2.515e-06	0.0010864
AFUA_3G14990	alpha/beta hydrolase, putative		101.46	29.4955	3.43984		Alpha/beta hydrolase, putative (EC 3.-.-.-)	GO:0008152	metabolic process	BP	IEA	0.0026803	0.41559	AFUA_3G14990	Alpha/beta hydrolase, putative (EC 3.-.-.-)	1.06	lipid, fatty acid and isoprenoid metabolism	Metabolism	4.5362e-06	0.0010864
AFUA_1G06050	nucleotide-sugar transporter, putative		60.678	17.6398	3.43984		#N/A	#N/A	#N/A	#N/A	#N/A	#N/A	#N/A	AFUA_1G06050	#N/A	#N/A	#N/A	#N/A	#N/A	#N/A
AFUA_5G07760	tetracycline-efflux transporter, putative		23.3295	6.78214	3.43984		#N/A	#N/A	#N/A	#N/A	#N/A	#N/A	#N/A	AFUA_5G07760	#N/A	#N/A	#N/A	#N/A	#N/A	#N/A
AFUA_2G04490	D-3-phosphoglycerate dehydrogenase		17.8272	5.18258	3.43984		D-3-phosphoglycerate dehydrogenase (EC 1.1.1.95)	GO:0055114	oxidation-reduction process	BP	IEA	7.8355e-8	6.6367e-05	AFUA_2G04490	D-3-phosphoglycerate dehydrogenase (EC 1.1.1.95)	1.05	C-compound and carbohydrate metabolism	Metabolism	2.515e-06	0.0010864
AFUA_4G03722	conserved hypothetical protein		9.56804	2.78154	3.43984		Uncharacterized protein	GO:0005575	cellular_component	CC	ND	3.3105e-7	9.3467e-05	AFUA_4G03722	#N/A	#N/A	#N/A	#N/A	#N/A	#N/A
AFUA_5G10930	conserved hypothetical protein		25.7978	7.4997	3.43984		#N/A	#N/A	#N/A	#N/A	#N/A	#N/A	#N/A	AFUA_5G10930	#N/A	#N/A	#N/A	#N/A	#N/A	#N/A
AFUA_4G13860	extracellular salicylate hydroxylase/monooxygenase, putative		32.3024	9.39066	3.43984		Extracellular salicylate hydroxylase/monooxygenase, putative (EC 1.14.13.-)	GO:0055114	oxidation-reduction process	BP	IEA	7.8355e-8	6.6367e-05	AFUA_4G13860	Extracellular salicylate hydroxylase/monooxygenase, putative (EC 1.14.13.-)	1.06	lipid, fatty acid and isoprenoid metabolism	Metabolism	4.5362e-06	0.0010864
AFUA_8G07110	alanyl-tRNA synthetase, putative		13.7933	4.00988	3.43984		#N/A	#N/A	#N/A	#N/A	#N/A	#N/A	#N/A	AFUA_8G07110	#N/A	#N/A	#N/A	#N/A	#N/A	#N/A
AFUA_4G14085	cell surface protein, putative		14.8794	4.32562	3.43984		Cell surface protein, putative	GO:0005575	cellular_component	CC	ND	3.3105e-7	9.3467e-05	AFUA_4G14085	#N/A	#N/A	#N/A	#N/A	#N/A	#N/A
AFUA_2G02860	F-box domain protein		31.1487	9.05528	3.43984		F-box domain protein	GO:0005575	cellular_component	CC	ND	3.3105e-7	9.3467e-05	AFUA_2G02860	#N/A	#N/A	#N/A	#N/A	#N/A	#N/A
AFUA_2G16530	cyanate hydratase, putative		146.298	42.5306	3.43984		#N/A	#N/A	#N/A	#N/A	#N/A	#N/A	#N/A	AFUA_2G16530	Cyanate hydratase (Cyanase) (EC 4.2.1.104) (Cyanate hydrolase) (Cyanate lyase)	1.02	nitrogen, sulfur and selenium metabolism	Metabolism	0.011195	0.25186
AFUA_1G14340	metalloreductase, putative		6.08595	1.76925	3.43984		Metalloreductase, putative (EC 1.16.1.-)	GO:0055114	oxidation-reduction process	BP	IEA	7.8355e-8	6.6367e-05	AFUA_1G14340	Metalloreductase, putative (EC 1.16.1.-)	34.01.01.01	homeostasis of metal ions (Na, K, Ca etc.)	Interaction with the environment	0.0011954	0.067524
AFUA_1G09140	conserved hypothetical protein		6.78523	1.97254	3.43984		Uncharacterized protein	GO:0005575	cellular_component	CC	ND	3.3105e-7	9.3467e-05	AFUA_1G09140	#N/A	#N/A	#N/A	#N/A	#N/A	#N/A
AFUA_2G03680	high osmolarity glycerol pathway protein Nbp2, putative		150.174	43.6572	3.43984		High osmolarity glycerol pathway protein Nbp2, putative	GO:0005575	cellular_component	CC	ND	3.3105e-7	9.3467e-05	AFUA_2G03680	#N/A	#N/A	#N/A	#N/A	#N/A	#N/A
AFUA_1G12410	salicylate hydroxylase, putative		16.1167	4.68532	3.43984		Salicylate hydroxylase, putative (EC 1.14.13.1)	GO:0055114	oxidation-reduction process	BP	IEA	7.8355e-8	6.6367e-05	AFUA_1G12410	Salicylate hydroxylase, putative (EC 1.14.13.1)	1.06	lipid, fatty acid and isoprenoid metabolism	Metabolism	4.5362e-06	0.0010864
AFUA_7G06650	alpha/beta hydrolase, putative		12.6825	3.68694	3.43984		Alpha/beta hydrolase, putative (EC 3.3.2.9)	GO:0005575	cellular_component	CC	ND	3.3105e-7	9.3467e-05	AFUA_7G06650	#N/A	#N/A	#N/A	#N/A	#N/A	#N/A
AFUA_3G07570	conserved hypothetical protein		14.0497	4.08441	3.43984		Uncharacterized protein	GO:0005575	cellular_component	CC	ND	3.3105e-7	9.3467e-05	AFUA_3G07570	#N/A	#N/A	#N/A	#N/A	#N/A	#N/A
AFUA_3G14700	polyketide synthase, putative		1.50273	0.436862	3.43984		Polyketide synthase, putative (EC 2.3.1.-)	GO:0055114	oxidation-reduction process	BP	IEA	7.8355e-8	6.6367e-05	AFUA_3G14700	#N/A	#N/A	#N/A	#N/A	#N/A	#N/A
AFUA_1G04350	conserved hypothetical protein		21.7205	6.31441	3.43984		Uncharacterized protein	GO:0055114	oxidation-reduction process	BP	IEA	7.8355e-8	6.6367e-05	AFUA_1G04350	Uncharacterized protein	1.2	secondary metabolism	Metabolism	0.0024405	0.078984
AFUA_2G01000	LIM domain protein		9.42488	2.73992	3.43984		LIM domain protein	GO:0005575	cellular_component	CC	ND	3.3105e-7	9.3467e-05	AFUA_2G01000	LIM domain protein	30.05.02.26	integrin receptor signalling pathway	Cellular communication / signal transduction mechanism	0.0014273	0.068367
AFUA_2G08340	conserved hypothetical protein		9.08504	2.64112	3.43984		Uncharacterized protein	GO:0005575	cellular_component	CC	ND	3.3105e-7	9.3467e-05	AFUA_2G08340	#N/A	#N/A	#N/A	#N/A	#N/A	#N/A
AFUA_5G01690	DUF1445 domain protein		12.5145	3.6381	3.43984		#N/A	#N/A	#N/A	#N/A	#N/A	#N/A	#N/A	AFUA_5G01690	#N/A	#N/A	#N/A	#N/A	#N/A	#N/A
AFUA_5G10690	MFS monosaccharide transporter, putative		21.2723	6.18409	3.43984		#N/A	#N/A	#N/A	#N/A	#N/A	#N/A	#N/A	AFUA_5G10690	MFS monosaccharide transporter, putative	1.2	secondary metabolism	Metabolism	0.0024405	0.078984
AFUA_6G02705	conserved hypothetical protein		37.7938	10.9871	3.43984		Uncharacterized protein	GO:0005575	cellular_component	CC	ND	3.3105e-7	9.3467e-05	AFUA_6G02705	#N/A	#N/A	#N/A	#N/A	#N/A	#N/A
AFUA_7G02380	ferulic acid esterase (FaeA), putative		16.0824	4.67535	3.43984		Ferulic acid esterase (FaeA), putative (EC 3.1.1.73)	GO:0005575	cellular_component	CC	ND	3.3105e-7	9.3467e-05	AFUA_7G02380	Ferulic acid esterase (FaeA), putative (EC 3.1.1.73)	1.2	secondary metabolism	Metabolism	0.0024405	0.078984
AFUA_7G06660	conserved hypothetical protein		9.69071	2.8172	3.43984		Uncharacterized protein	GO:0005575	cellular_component	CC	ND	3.3105e-7	9.3467e-05	AFUA_7G06660	#N/A	#N/A	#N/A	#N/A	#N/A	#N/A
AFUA_1G16930	phosphatidylserine decarboxylase, putative		10.8916	3.1663	3.43984		Phosphatidylserine decarboxylase, putative (EC 4.1.1.65)	GO:0005575	cellular_component	CC	ND	3.3105e-7	9.3467e-05	AFUA_1G16930	Phosphatidylserine decarboxylase, putative (EC 4.1.1.65)	1.06	lipid, fatty acid and isoprenoid metabolism	Metabolism	4.5362e-06	0.0010864
AFUA_2G07920	cytochrome P450 monooxygenase, putative		7.18512	2.0888	3.43984		Cytochrome P450 monooxygenase, putative (EC 1.14.-.-)	GO:0055114	oxidation-reduction process	BP	IEA	7.8355e-8	6.6367e-05	AFUA_2G07920	Cytochrome P450 monooxygenase, putative (EC 1.14.-.-)	1.2	secondary metabolism	Metabolism	0.0024405	0.078984
AFUA_4G14540	C6 transcription factor (AflR), putative		9.51984	2.76752	3.43984		#N/A	#N/A	#N/A	#N/A	#N/A	#N/A	#N/A	AFUA_4G14540	#N/A	#N/A	#N/A	#N/A	#N/A	#N/A
AFUA_7G01540	endo-1,4-beta-glucanase		27.7895	8.07873	3.43984		Probable endo-beta-1,4-glucanase celB (Endoglucanase celB) (EC 3.2.1.4) (Carboxymethylcellulase celB) (Cellulase B)	GO:0005575	cellular_component	CC	ND	3.3105e-7	9.3467e-05	AFUA_7G01540	Probable endo-beta-1,4-glucanase celB (Endoglucanase celB) (EC 3.2.1.4) (Carboxymethylcellulase celB) (Cellulase B)	01.05.03	polysaccharide metabolism	Metabolism	0.012778	0.25186
AFUA_1G14540	oxidoreductase, short-chain dehydrogenase/reductase family		39.2323	11.4053	3.43984		Oxidoreductase, short-chain dehydrogenase/reductase family (EC 1.1.1.69)	GO:0055114	oxidation-reduction process	BP	IEA	7.8355e-8	6.6367e-05	AFUA_1G14540	Oxidoreductase, short-chain dehydrogenase/reductase family (EC 1.1.1.69)	1.05	C-compound and carbohydrate metabolism	Metabolism	2.515e-06	0.0010864
AFUA_2G06270	hypothetical protein		30.9785	9.00579	3.43984		Uncharacterized protein	GO:0005575	cellular_component	CC	ND	3.3105e-7	9.3467e-05	AFUA_2G06270	#N/A	#N/A	#N/A	#N/A	#N/A	#N/A
AFUA_6G02340	conserved hypothetical protein		15.8464	4.60674	3.43984		Uncharacterized protein	GO:0005575	cellular_component	CC	ND	3.3105e-7	9.3467e-05	AFUA_6G02340	#N/A	#N/A	#N/A	#N/A	#N/A	#N/A
AFUA_1G17140	voltage-gated K+ channel beta subunit (KCNAB), putative		74.9451	21.7874	3.43984		Voltage-gated K+ channel beta subunit (KCNAB), putative (EC 1.-.-.-)	GO:0055114	oxidation-reduction process	BP	IEA	7.8355e-8	6.6367e-05	AFUA_1G17140	Voltage-gated K+ channel beta subunit (KCNAB), putative (EC 1.-.-.-)	34.01.01.01	homeostasis of metal ions (Na, K, Ca etc.)	Interaction with the environment	0.0011954	0.067524
AFUA_1G01660	alpha-L-rhamnosidase A, putative		16.7476	4.86872	3.43984		Alpha-L-rhamnosidase A, putative	GO:0005575	cellular_component	CC	ND	3.3105e-7	9.3467e-05	AFUA_1G01660	Alpha-L-rhamnosidase A, putative	01.05.03	polysaccharide metabolism	Metabolism	0.012778	0.25186
AFUA_4G01580	ankyrin repeat protein		2.1425	0.62285	3.43984		Ankyrin repeat protein	GO:0005575	cellular_component	CC	ND	3.3105e-7	9.3467e-05	AFUA_4G01580	#N/A	#N/A	#N/A	#N/A	#N/A	#N/A
AFUA_2G05330	vacuolar H+\/Ca2+ exchanger		10.8916	3.1663	3.43984		#N/A	#N/A	#N/A	#N/A	#N/A	#N/A	#N/A	AFUA_2G05330	Vacuolar H+/Ca2+ exchanger	34.01.01.01	homeostasis of metal ions (Na, K, Ca etc.)	Interaction with the environment	0.0011954	0.067524
AFUA_6G03590	citrate synthase Cit1, putative		8.11025	2.35774	3.43984		#N/A	#N/A	#N/A	#N/A	#N/A	#N/A	#N/A	AFUA_6G03590	Citrate synthase	01.05.06.07	C-2 compound and organic acid catabolism	Metabolism	0.012005	0.25186
AFUA_5G03540	thioredoxin reductase, putative		19.5317	5.67807	3.43984		Thioredoxin reductase, putative (EC 1.-.-.-)	GO:0055114	oxidation-reduction process	BP	IEA	7.8355e-8	6.6367e-05	AFUA_5G03540	Thioredoxin reductase, putative (EC 1.-.-.-)	1.2	secondary metabolism	Metabolism	0.0024405	0.078984
AFUA_3G06020	glyoxalase family protein		6.57283	1.91079	3.43984		Glyoxalase family protein	GO:0005575	cellular_component	CC	ND	3.3105e-7	9.3467e-05	AFUA_3G06020	#N/A	#N/A	#N/A	#N/A	#N/A	#N/A
AFUA_2G11990	phosphoinositide phosphatase Pten/Tep1, putative		103.368	30.0501	3.43984		Phosphoinositide phosphatase Pten/Tep1, putative (EC 3.1.3.48)	GO:0005575	cellular_component	CC	ND	3.3105e-7	9.3467e-05	AFUA_2G11990	Phosphoinositide phosphatase Pten/Tep1, putative (EC 3.1.3.48)	43.01.03.09	development of asco- basidio- or zygospore	Cell type differentiation	0.035951	0.41473
AFUA_2G11030	hypothetical protein		27.6877	8.04913	3.43984		Uncharacterized protein	GO:0005575	cellular_component	CC	ND	3.3105e-7	9.3467e-05	AFUA_2G11030	#N/A	#N/A	#N/A	#N/A	#N/A	#N/A
AFUA_1G03630	GPI anchored serine-threonine rich protein		15.0573	4.37732	3.43984		GPI anchored serine-threonine rich protein (EC 3.1.1.5)	GO:0005575	cellular_component	CC	ND	3.3105e-7	9.3467e-05	AFUA_1G03630	#N/A	#N/A	#N/A	#N/A	#N/A	#N/A
AFUA_2G17520	GNAT family N-acetyltransferase, putative		34.2025	9.94305	3.43984		GNAT family N-acetyltransferase, putative (EC 2.3.1.-)	GO:0005575	cellular_component	CC	ND	3.3105e-7	9.3467e-05	AFUA_2G17520	#N/A	#N/A	#N/A	#N/A	#N/A	#N/A
AFUA_1G01760	integral membrane protein		25.6229	7.44886	3.43984		Integral membrane protein	GO:0005575	cellular_component	CC	ND	3.3105e-7	9.3467e-05	AFUA_1G01760	#N/A	#N/A	#N/A	#N/A	#N/A	#N/A
AFUA_1G15490	MFS multidrug transporter, putative		18.8029	5.4662	3.43984		#N/A	#N/A	#N/A	#N/A	#N/A	#N/A	#N/A	AFUA_1G15490	MFS multidrug transporter, putative	32.07	detoxification	Cell rescue, defense and virulence	8.7992e-06	0.0014049
AFUA_2G16930	succinate:fumarate antiporter (Acr1), putative		10.8916	3.1663	3.43984		#N/A	#N/A	#N/A	#N/A	#N/A	#N/A	#N/A	AFUA_2G16930	Succinate:fumarate antiporter (Acr1), putative	20.03.02.03	antiporter	Cellular transport, transport facilitation and transport routes	0.0084949	0.22383
AFUA_3G02950	short-chain oxidoreductase, putative		16.2205	4.71548	3.43984		Short-chain oxidoreductase, putative (EC 1.-.-.-)	GO:0055114	oxidation-reduction process	BP	IEA	7.8355e-8	6.6367e-05	AFUA_3G02950	Short-chain oxidoreductase, putative (EC 1.-.-.-)	1.05	C-compound and carbohydrate metabolism	Metabolism	2.515e-06	0.0010864
AFUA_2G08470	GTP binding protein (Bud4), putative		5.36082	1.55845	3.43984		#N/A	#N/A	#N/A	#N/A	#N/A	#N/A	#N/A	AFUA_2G08470	#N/A	#N/A	#N/A	#N/A	#N/A	#N/A
AFUA_2G14020	ABC transporter, putative		6.00855	1.74675	3.43984		#N/A	#N/A	#N/A	#N/A	#N/A	#N/A	#N/A	AFUA_2G14020	ABC transporter, putative	20.03.25	ABC transporters	Cellular transport, transport facilitation and transport routes	0.026393	0.38309
AFUA_1G02080	conserved hypothetical protein		48.4535	14.086	3.43984		Uncharacterized protein	GO:0005575	cellular_component	CC	ND	3.3105e-7	9.3467e-05	AFUA_1G02080	#N/A	#N/A	#N/A	#N/A	#N/A	#N/A
AFUA_2G17800	C6 transcription factor, putative		6.90928	2.0086	3.43984		#N/A	#N/A	#N/A	#N/A	#N/A	#N/A	#N/A	AFUA_2G17800	#N/A	#N/A	#N/A	#N/A	#N/A	#N/A
AFUA_4G06970	RAD52 DNA repair protein RADC		60.2024	17.5015	3.43984		#N/A	#N/A	#N/A	#N/A	#N/A	#N/A	#N/A	AFUA_4G06970	#N/A	#N/A	#N/A	#N/A	#N/A	#N/A
AFUA_2G04350	conserved hypothetical protein		49.1893	14.2999	3.43984		Uncharacterized protein	GO:0005575	cellular_component	CC	ND	3.3105e-7	9.3467e-05	AFUA_2G04350	#N/A	#N/A	#N/A	#N/A	#N/A	#N/A
AFUA_2G00880	C6 finger domain protein, putative		12.3509	3.59054	3.43984		#N/A	#N/A	#N/A	#N/A	#N/A	#N/A	#N/A	AFUA_2G00880	#N/A	#N/A	#N/A	#N/A	#N/A	#N/A
AFUA_1G01330	oxidoreductase, short-chain dehydrogenase/reductase family		14.4251	4.19354	3.43984		Oxidoreductase, short-chain dehydrogenase/reductase family	GO:0055114	oxidation-reduction process	BP	IEA	7.8355e-8	6.6367e-05	AFUA_1G01330	Oxidoreductase, short-chain dehydrogenase/reductase family	1.05	C-compound and carbohydrate metabolism	Metabolism	2.515e-06	0.0010864
AFUA_1G03180	DUF636 domain protein		27.9954	8.13857	3.43984		DUF636 domain protein	GO:0005575	cellular_component	CC	ND	3.3105e-7	9.3467e-05	AFUA_1G03180	#N/A	#N/A	#N/A	#N/A	#N/A	#N/A
AFUA_2G08110	hexokinase family protein		6.50495	1.89106	3.43984		Hexokinase family protein (EC 2.7.1.-)	GO:0005575	cellular_component	CC	ND	3.3105e-7	9.3467e-05	AFUA_2G08110	Hexokinase family protein (EC 2.7.1.-)	1.05	C-compound and carbohydrate metabolism	Metabolism	2.515e-06	0.0010864
AFUA_3G10320	RING finger domain protein		68.4394	19.8961	3.43984		RING finger domain protein	GO:0005575	cellular_component	CC	ND	3.3105e-7	9.3467e-05	AFUA_3G10320	#N/A	#N/A	#N/A	#N/A	#N/A	#N/A
AFUA_4G14240	O-methyltransferase, putative		10.1596	2.95351	3.43984		O-methyltransferase, putative	GO:0005575	cellular_component	CC	ND	3.3105e-7	9.3467e-05	AFUA_4G14240	O-methyltransferase, putative	1.05	C-compound and carbohydrate metabolism	Metabolism	2.515e-06	0.0010864
AFUA_5G01830	extracellular endoglucanase, putative		6.56142	1.90748	3.43984		Extracellular endoglucanase, putative (EC 3.2.1.4)	GO:0005575	cellular_component	CC	ND	3.3105e-7	9.3467e-05	AFUA_5G01830	#N/A	#N/A	#N/A	#N/A	#N/A	#N/A
AFUA_6G08590	protein kinase, putative		3.88026	1.12804	3.43984		Protein kinase, putative (EC 2.7.1.-)	GO:0005575	cellular_component	CC	ND	3.3105e-7	9.3467e-05	AFUA_6G08590	#N/A	#N/A	#N/A	#N/A	#N/A	#N/A
AFUA_8G02100	beta-glucosidase, putative		4.68324	1.36147	3.43984		Beta-glucosidase, putative (EC 3.2.1.21)	GO:0005575	cellular_component	CC	ND	3.3105e-7	9.3467e-05	AFUA_8G02100	Beta-glucosidase, putative (EC 3.2.1.21)	01.05.03	polysaccharide metabolism	Metabolism	0.012778	0.25186
AFUA_8G05100	conserved hypothetical protein		101.596	29.5351	3.43984		Uncharacterized protein	GO:0005575	cellular_component	CC	ND	3.3105e-7	9.3467e-05	AFUA_8G05100	#N/A	#N/A	#N/A	#N/A	#N/A	#N/A
AFUA_1G01670	formaldehyde dehydrogenase, putative		8.09288	2.35269	3.43984		Formaldehyde dehydrogenase, putative (EC 1.2.1.-)	GO:0055114	oxidation-reduction process	BP	IEA	7.8355e-8	6.6367e-05	AFUA_1G01670	Formaldehyde dehydrogenase, putative (EC 1.2.1.-)	1.05	C-compound and carbohydrate metabolism	Metabolism	2.515e-06	0.0010864
AFUA_8G05805	cellobiose dehydrogenase, putative		9.10693	2.64749	3.43984		#N/A	#N/A	#N/A	#N/A	#N/A	#N/A	#N/A	AFUA_8G05805	#N/A	#N/A	#N/A	#N/A	#N/A	#N/A
AFUA_1G16300	conserved hypothetical protein		67.4888	19.6198	3.43984		Uncharacterized protein	GO:0005575	cellular_component	CC	ND	3.3105e-7	9.3467e-05	AFUA_1G16300	#N/A	#N/A	#N/A	#N/A	#N/A	#N/A
AFUA_6G06470	heat shock protein Hsp30-like, putative		1543.89	453.075	3.40759		Heat shock protein Hsp30-like, putative	GO:0005575	cellular_component	CC	ND	3.3105e-7	9.3467e-05	AFUA_6G06470	Heat shock protein Hsp30-like, putative	32.01.01	oxidative stress response	Cell rescue, defense and virulence	0.030979	0.41473
AFUA_2G06070	mRNA splicing factor (Prp1/Zer1), putative		144.733	42.6682	3.39206		#N/A	#N/A	#N/A	#N/A	#N/A	#N/A	#N/A	AFUA_2G06070	mRNA splicing factor (Prp1/Zer1), putative	1.05	C-compound and carbohydrate metabolism	Metabolism	2.515e-06	0.0010864
AFUA_1G06060	conserved hypothetical protein		71.0362	21.1993	3.35088		#N/A	#N/A	#N/A	#N/A	#N/A	#N/A	#N/A	AFUA_1G06060	#N/A	#N/A	#N/A	#N/A	#N/A	#N/A
AFUA_1G12180	GTP-binding protein Sey1, putative		161.661	48.2669	3.34932		Protein sey1 (EC 3.6.5.-)	GO:0008152	metabolic process	BP	IEA	0.0026803	0.41559	AFUA_1G12180	Protein sey1 (EC 3.6.5.-)	42.02	eukaryotic plasma membrane	Biogenesis of cellular components	0.045738	0.48136
AFUA_5G12550	N-acetylglucosaminyl-phosphatidylinositol deacetylase, putative		108.781	32.5275	3.34429		#N/A	#N/A	#N/A	#N/A	#N/A	#N/A	#N/A	AFUA_5G12550	N-acetylglucosaminyl-phosphatidylinositol deacetylase, putative	1.06	lipid, fatty acid and isoprenoid metabolism	Metabolism	4.5362e-06	0.0010864
AFUA_2G05990	conserved hypothetical protein		112.481	33.6339	3.34429		Uncharacterized protein	GO:0005575	cellular_component	CC	ND	3.3105e-7	9.3467e-05	AFUA_2G05990	#N/A	#N/A	#N/A	#N/A	#N/A	#N/A
AFUA_4G10190	NAD binding Rossmann fold oxidoreductase, putative		87.0251	26.022	3.34429		NAD binding Rossmann fold oxidoreductase, putative (EC 1.-.-.-)	GO:0055114	oxidation-reduction process	BP	IEA	7.8355e-8	6.6367e-05	AFUA_4G10190	#N/A	#N/A	#N/A	#N/A	#N/A	#N/A
AFUA_7G01810	C6 transcription factor, putative		58.9845	17.7825	3.31699		#N/A	#N/A	#N/A	#N/A	#N/A	#N/A	#N/A	AFUA_7G01810	#N/A	#N/A	#N/A	#N/A	#N/A	#N/A
AFUA_2G01550	mitogen-activated protein kinase MAF1		64.6768	19.6198	3.29651		Mitogen-activated protein kinase MAF1	GO:0005575	cellular_component	CC	ND	3.3105e-7	9.3467e-05	AFUA_2G01550	#N/A	#N/A	#N/A	#N/A	#N/A	#N/A
AFUA_3G06110	proteasome regulatory particle subunit (RpnC), putative		334.17	101.446	3.29408		#N/A	#N/A	#N/A	#N/A	#N/A	#N/A	#N/A	AFUA_3G06110	#N/A	#N/A	#N/A	#N/A	#N/A	#N/A
AFUA_4G02940	bZIP transcription factor, putative		267.351	81.2548	3.29028		Putative transcription factor kapC	GO:0005575	cellular_component	CC	ND	3.3105e-7	9.3467e-05	AFUA_4G02940	#N/A	#N/A	#N/A	#N/A	#N/A	#N/A
AFUA_5G10790	oxidoreductase, short chain dehydrogenase/reductase family		91.0171	27.7197	3.28348		Oxidoreductase, short chain dehydrogenase/reductase family (EC 1.1.1.-)	GO:0055114	oxidation-reduction process	BP	IEA	7.8355e-8	6.6367e-05	AFUA_5G10790	Oxidoreductase, short chain dehydrogenase/reductase family (EC 1.1.1.-)	1.05	C-compound and carbohydrate metabolism	Metabolism	2.515e-06	0.0010864
AFUA_3G05980	conserved hypothetical protein		61.6908	18.8781	3.26785		Uncharacterized protein	GO:0005575	cellular_component	CC	ND	3.3105e-7	9.3467e-05	AFUA_3G05980	#N/A	#N/A	#N/A	#N/A	#N/A	#N/A
AFUA_3G11955	transcription regulator PAB1642, putative		118.105	36.1417	3.26785		Transcription regulator PAB1642, putative	GO:0005575	cellular_component	CC	ND	3.3105e-7	9.3467e-05	AFUA_3G11955	#N/A	#N/A	#N/A	#N/A	#N/A	#N/A
AFUA_5G14180	conserved hypothetical protein		67.7435	20.7303	3.26785		Uncharacterized protein	GO:0005575	cellular_component	CC	ND	3.3105e-7	9.3467e-05	AFUA_5G14180	#N/A	#N/A	#N/A	#N/A	#N/A	#N/A
AFUA_2G14970	Gamma-butyrobetaine hydroxylase subfamily, putative		140.555	43.131	3.2588		Gamma-butyrobetaine hydroxylase subfamily, putative	GO:0055114	oxidation-reduction process	BP	IEA	7.8355e-8	6.6367e-05	AFUA_2G14970	Gamma-butyrobetaine hydroxylase subfamily, putative	1.05	C-compound and carbohydrate metabolism	Metabolism	2.515e-06	0.0010864
AFUA_3G10840	zinc knuckle transcription factor/splicing factor MSL5/ZFM1, putative		434.928	133.705	3.25289		#N/A	#N/A	#N/A	#N/A	#N/A	#N/A	#N/A	AFUA_3G10840	#N/A	#N/A	#N/A	#N/A	#N/A	#N/A
AFUA_1G01610	conserved hypothetical protein		232.018	71.5135	3.24439		Uncharacterized protein	GO:0005575	cellular_component	CC	ND	3.3105e-7	9.3467e-05	AFUA_1G01610	#N/A	#N/A	#N/A	#N/A	#N/A	#N/A
AFUA_4G03360	GPI anchored protein, putative		3503.99	1082.14	3.23801		GPI anchored protein, putative	GO:0005575	cellular_component	CC	ND	3.3105e-7	9.3467e-05	AFUA_4G03360	#N/A	#N/A	#N/A	#N/A	#N/A	#N/A
AFUA_7G00940	isoamyl alcohol oxidase, putative		676.835	209.177	3.23571		Isoamyl alcohol oxidase, putative	GO:0055114	oxidation-reduction process	BP	IEA	7.8355e-8	6.6367e-05	AFUA_7G00940	Isoamyl alcohol oxidase, putative	1.05	C-compound and carbohydrate metabolism	Metabolism	2.515e-06	0.0010864
AFUA_4G08960	GPI anchored cell wall protein, putative		449.228	139.113	3.22924		GPI anchored cell wall protein, putative	GO:0005575	cellular_component	CC	ND	3.3105e-7	9.3467e-05	AFUA_4G08960	#N/A	#N/A	#N/A	#N/A	#N/A	#N/A
AFUA_6G10710	hypothetical protein		16.1973	5.02266	3.22485		Uncharacterized protein	GO:0005575	cellular_component	CC	ND	3.3105e-7	9.3467e-05	AFUA_6G10710	#N/A	#N/A	#N/A	#N/A	#N/A	#N/A
AFUA_4G08920	protein kinase, putative		20.5104	6.3601	3.22485		Protein kinase, putative	GO:0005575	cellular_component	CC	ND	3.3105e-7	9.3467e-05	AFUA_4G08920	#N/A	#N/A	#N/A	#N/A	#N/A	#N/A
AFUA_3G06180	DNA lyase Apn2		43.6754	13.5434	3.22485		#N/A	#N/A	#N/A	#N/A	#N/A	#N/A	#N/A	AFUA_3G06180	DNA lyase Apn2 (EC 3.1.11.2)	01.03.16.03	DNA degradation	Metabolism	0.050511	0.49378
AFUA_2G05250	transcription factor RfeD, putative		27.1507	8.41921	3.22485		Transcription factor RfeD, putative	GO:0005575	cellular_component	CC	ND	3.3105e-7	9.3467e-05	AFUA_2G05250	#N/A	#N/A	#N/A	#N/A	#N/A	#N/A
AFUA_1G04100	conserved hypothetical protein		207.405	64.3145	3.22485		Uncharacterized protein	GO:0005575	cellular_component	CC	ND	3.3105e-7	9.3467e-05	AFUA_1G04100	#N/A	#N/A	#N/A	#N/A	#N/A	#N/A
AFUA_3G08200	alpha-mannosidase		52.0575	16.1426	3.22485		Alpha-mannosidase (EC 3.2.1.24)	GO:0008152	metabolic process	BP	IEA	0.0026803	0.41559	AFUA_3G08200	Alpha-mannosidase (EC 3.2.1.24)	1.05	C-compound and carbohydrate metabolism	Metabolism	2.515e-06	0.0010864
AFUA_1G07220	6-phosphofructo-2-kinase 1		274.524	85.2311	3.22094		6-phosphofructo-2-kinase 1	GO:0005575	cellular_component	CC	ND	3.3105e-7	9.3467e-05	AFUA_1G07220	6-phosphofructo-2-kinase 1	2.01	glycolysis and gluconeogenesis	Energy	0.024772	0.37081
AFUA_4G11650	alpha-ketoglutarate dehydrogenase complex subunit Kgd1, putative		505.465	157.848	3.20222		Alpha-ketoglutarate dehydrogenase complex subunit Kgd1, putative (EC 1.2.4.2)	GO:0055114	oxidation-reduction process	BP	IEA	7.8355e-8	6.6367e-05	AFUA_4G11650	Alpha-ketoglutarate dehydrogenase complex subunit Kgd1, putative (EC 1.2.4.2)	1.05	C-compound and carbohydrate metabolism	Metabolism	2.515e-06	0.0010864
AFUA_2G06000	NAD+ dependent glutamate dehydrogenase, putative		980.254	306.312	3.20018		NAD+ dependent glutamate dehydrogenase, putative (EC 1.4.1.2)	GO:0055114	oxidation-reduction process	BP	IEA	7.8355e-8	6.6367e-05	AFUA_2G06000	NAD+ dependent glutamate dehydrogenase, putative (EC 1.4.1.2)	1.02	nitrogen, sulfur and selenium metabolism	Metabolism	0.011195	0.25186
AFUA_4G02810	oxidoreductase, putative		335.631	104.951	3.19798		Oxidoreductase, putative	GO:0005575	cellular_component	CC	ND	3.3105e-7	9.3467e-05	AFUA_4G02810	#N/A	#N/A	#N/A	#N/A	#N/A	#N/A
AFUA_8G05660	myosin I MyoA/Myo5		185.541	58.0547	3.19597		#N/A	#N/A	#N/A	#N/A	#N/A	#N/A	#N/A	AFUA_8G05660	#N/A	#N/A	#N/A	#N/A	#N/A	#N/A
AFUA_5G09210	autophagic serine protease Alp2		247.641	77.5297	3.19414		#N/A	#N/A	#N/A	#N/A	#N/A	#N/A	#N/A	AFUA_5G09210	Alkaline protease 2 (ALP2) (EC 3.4.21.63) (Autophagic serine protease alp2) (allergen Asp f 18)	14.13.04.02	vacuolar protein degradation	Protein fate (folding, modification, destination)	0.00096981	0.066362
AFUA_4G11467	thermatolerance membrane protein Dlt1, putative		118.39	37.0648	3.19414		Thermatolerance membrane protein Dlt1, putative	GO:0005575	cellular_component	CC	ND	3.3105e-7	9.3467e-05	AFUA_4G11467	#N/A	#N/A	#N/A	#N/A	#N/A	#N/A
AFUA_6G09305	conserved hypothetical protein		201.78	63.3153	3.18691		#N/A	#N/A	#N/A	#N/A	#N/A	#N/A	#N/A	AFUA_6G09305	#N/A	#N/A	#N/A	#N/A	#N/A	#N/A
AFUA_5G03240	pyruvate dehydrogenase kinase, putative		158.187	49.7152	3.18185		#N/A	#N/A	#N/A	#N/A	#N/A	#N/A	#N/A	AFUA_5G03240	#N/A	#N/A	#N/A	#N/A	#N/A	#N/A
AFUA_8G00730	transcription regulator (RTG2), putative		92.4474	29.1531	3.1711		Transcription regulator (RTG2), putative	GO:0005575	cellular_component	CC	ND	3.3105e-7	9.3467e-05	AFUA_8G00730	#N/A	#N/A	#N/A	#N/A	#N/A	#N/A
AFUA_7G04160	integral peroxisomal membrane protein		82.4642	26.0049	3.1711		#N/A	#N/A	#N/A	#N/A	#N/A	#N/A	#N/A	AFUA_7G04160	#N/A	#N/A	#N/A	#N/A	#N/A	#N/A
AFUA_2G11840	transcriptional corepressor Cyc8, putative		328.736	103.795	3.16717		#N/A	#N/A	#N/A	#N/A	#N/A	#N/A	#N/A	AFUA_2G11840	#N/A	#N/A	#N/A	#N/A	#N/A	#N/A
AFUA_4G09810	hypothetical protein		433.053	137.338	3.15319		#N/A	#N/A	#N/A	#N/A	#N/A	#N/A	#N/A	AFUA_4G09810	#N/A	#N/A	#N/A	#N/A	#N/A	#N/A
AFUA_6G13780	MFS multidrug transporter, putative		18.5926	5.89646	3.15319		#N/A	#N/A	#N/A	#N/A	#N/A	#N/A	#N/A	AFUA_6G13780	MFS multidrug transporter, putative	32.07	detoxification	Cell rescue, defense and virulence	8.7992e-06	0.0014049
AFUA_5G08100	conserved hypothetical protein		59.7315	18.9432	3.15319		Uncharacterized protein	GO:0005575	cellular_component	CC	ND	3.3105e-7	9.3467e-05	AFUA_5G08100	#N/A	#N/A	#N/A	#N/A	#N/A	#N/A
AFUA_7G06670	NACHT and TPR domain protein		7.43439	2.35774	3.15319		NACHT and TPR domain protein	GO:0005575	cellular_component	CC	ND	3.3105e-7	9.3467e-05	AFUA_7G06670	#N/A	#N/A	#N/A	#N/A	#N/A	#N/A
AFUA_2G00220	aminopeptidase, putative		39.5935	12.5566	3.15319		Aminopeptidase, putative	GO:0005575	cellular_component	CC	ND	3.3105e-7	9.3467e-05	AFUA_2G00220	Aminopeptidase, putative	14.13.04.02	vacuolar protein degradation	Protein fate (folding, modification, destination)	0.00096981	0.066362
AFUA_3G06360	UBX domain protein		55.1368	17.486	3.15319		UBX domain protein	GO:0005575	cellular_component	CC	ND	3.3105e-7	9.3467e-05	AFUA_3G06360	#N/A	#N/A	#N/A	#N/A	#N/A	#N/A
AFUA_3G05530	condensin complex component cnd1		9.28801	2.94559	3.15319		#N/A	#N/A	#N/A	#N/A	#N/A	#N/A	#N/A	AFUA_3G05530	#N/A	#N/A	#N/A	#N/A	#N/A	#N/A
AFUA_1G14150	conserved hypothetical protein		176.157	55.8664	3.15319		Uncharacterized protein	GO:0005575	cellular_component	CC	ND	3.3105e-7	9.3467e-05	AFUA_1G14150	#N/A	#N/A	#N/A	#N/A	#N/A	#N/A
AFUA_2G10150	peroxisome biosynthesis protein (PAS1/Peroxin-1), putative		8.57532	2.71957	3.15319		#N/A	#N/A	#N/A	#N/A	#N/A	#N/A	#N/A	AFUA_2G10150	#N/A	#N/A	#N/A	#N/A	#N/A	#N/A
AFUA_1G15520	urea amidolyase, putative		8.89075	2.81961	3.15319		Urea amidolyase, putative (EC 6.4.1.3)	GO:0008152	metabolic process	BP	IEA	0.0026803	0.41559	AFUA_1G15520	Urea amidolyase, putative (EC 6.4.1.3)	1.05	C-compound and carbohydrate metabolism	Metabolism	2.515e-06	0.0010864
AFUA_7G05230	conserved hypothetical protein		32.5808	10.3327	3.15319		Uncharacterized protein	GO:0005575	cellular_component	CC	ND	3.3105e-7	9.3467e-05	AFUA_7G05230	#N/A	#N/A	#N/A	#N/A	#N/A	#N/A
AFUA_5G08170	autophagocytosis protein Aut1, putative		136.122	43.4517	3.13271		#N/A	#N/A	#N/A	#N/A	#N/A	#N/A	#N/A	AFUA_5G08170	Autophagy-related protein 3 (Autophagy-related E2-like conjugation enzyme atg3)	14.13.04.02	vacuolar protein degradation	Protein fate (folding, modification, destination)	0.00096981	0.066362
AFUA_5G13100	conserved hypothetical protein		373.543	119.239	3.13271		Uncharacterized protein	GO:0005575	cellular_component	CC	ND	3.3105e-7	9.3467e-05	AFUA_5G13100	#N/A	#N/A	#N/A	#N/A	#N/A	#N/A
AFUA_6G02530	DNA repair protein RAD1, putative		88.0951	28.1431	3.13025		#N/A	#N/A	#N/A	#N/A	#N/A	#N/A	#N/A	AFUA_6G02530	DNA repair protein RAD1, putative	01.03.16.03	DNA degradation	Metabolism	0.050511	0.49378
AFUA_5G00760	chitin synthase C		44.1001	14.1024	3.12713		Chitin synthase C (EC 2.4.1.16) (Chitin-UDP acetyl-glucosaminyl transferase C) (Class-III chitin synthase C)	GO:0005575	cellular_component	CC	ND	3.3105e-7	9.3467e-05	AFUA_5G00760	Chitin synthase C (EC 2.4.1.16) (Chitin-UDP acetyl-glucosaminyl transferase C) (Class-III chitin synthase C)	01.05.03	polysaccharide metabolism	Metabolism	0.012778	0.25186
AFUA_6G02190	transcriptional activator (PtaC), putative		80.8273	25.9282	3.11735		SAGA-associated factor 11	GO:0005575	cellular_component	CC	ND	3.3105e-7	9.3467e-05	AFUA_6G02190	#N/A	#N/A	#N/A	#N/A	#N/A	#N/A
AFUA_2G14370	conserved hypothetical protein		319.147	102.546	3.11224		#N/A	#N/A	#N/A	#N/A	#N/A	#N/A	#N/A	AFUA_2G14370	#N/A	#N/A	#N/A	#N/A	#N/A	#N/A
AFUA_5G09580	conidial hydrophobin Hyp1/RodA		555.096	178.54	3.10909		#N/A	#N/A	#N/A	#N/A	#N/A	#N/A	#N/A	AFUA_5G09580	#N/A	#N/A	#N/A	#N/A	#N/A	#N/A
AFUA_5G07620	DUF1212 domain membrane protein		67.1825	21.6085	3.10909		DUF1212 domain membrane protein	GO:0005575	cellular_component	CC	ND	3.3105e-7	9.3467e-05	AFUA_5G07620	#N/A	#N/A	#N/A	#N/A	#N/A	#N/A
AFUA_4G03100	ras-like GTP-binding protein, putative		150.534	48.4176	3.10909		#N/A	#N/A	#N/A	#N/A	#N/A	#N/A	#N/A	AFUA_4G03100	#N/A	#N/A	#N/A	#N/A	#N/A	#N/A
AFUA_1G01560	C6 finger domain protein, putative		28.0647	9.06524	3.09586		C6 finger domain protein, putative	GO:0005575	cellular_component	CC	ND	3.3105e-7	9.3467e-05	AFUA_1G01560	#N/A	#N/A	#N/A	#N/A	#N/A	#N/A
AFUA_4G04220	conserved hypothetical protein		136.058	43.9483	3.09586		Uncharacterized protein	GO:0005575	cellular_component	CC	ND	3.3105e-7	9.3467e-05	AFUA_4G04220	#N/A	#N/A	#N/A	#N/A	#N/A	#N/A
AFUA_2G10960	alcohol dehydrogenase, putative		48.3159	15.6066	3.09586		Alcohol dehydrogenase, putative (EC 1.1.1.1)	GO:0055114	oxidation-reduction process	BP	IEA	7.8355e-8	6.6367e-05	AFUA_2G10960	Alcohol dehydrogenase, putative (EC 1.1.1.1)	1.05	C-compound and carbohydrate metabolism	Metabolism	2.515e-06	0.0010864
AFUA_6G03080	ABC multidrug transporter, putative		18.3394	5.97123	3.07129		#N/A	#N/A	#N/A	#N/A	#N/A	#N/A	#N/A	AFUA_6G03080	ABC multidrug transporter, putative	20.01.27	drug/toxin transport	Cellular transport, transport facilitation and transport routes	0.0012687	0.067524
AFUA_4G06420	fungal specific transcription factor, putative		37.8411	12.3759	3.05764		#N/A	#N/A	#N/A	#N/A	#N/A	#N/A	#N/A	AFUA_4G06420	#N/A	#N/A	#N/A	#N/A	#N/A	#N/A
AFUA_2G15960	nucleotide binding protein Nbp35, putative		174.769	57.1582	3.05764		Cytosolic Fe-S cluster assembly factor nbp35 (Nucleotide-binding protein 35)	GO:0005575	cellular_component	CC	ND	3.3105e-7	9.3467e-05	AFUA_2G15960	Cytosolic Fe-S cluster assembly factor nbp35 (Nucleotide-binding protein 35)	01.07.07	regulation of the metabolism of vitamins, cofactors, and prosthetic groups	Metabolism	0.036365	0.41473
AFUA_5G03380	flavin dependent monooxygenase, putative		61.957	20.263	3.05764		Flavin dependent monooxygenase, putative	GO:0055114	oxidation-reduction process	BP	IEA	7.8355e-8	6.6367e-05	AFUA_5G03380	Flavin dependent monooxygenase, putative	1.06	lipid, fatty acid and isoprenoid metabolism	Metabolism	4.5362e-06	0.0010864
AFUA_4G07050	L-lactate dehydrogenase		143.294	46.8643	3.05764		L-lactate dehydrogenase (EC 1.13.12.4)	GO:0055114	oxidation-reduction process	BP	IEA	7.8355e-8	6.6367e-05	AFUA_4G07050	L-lactate dehydrogenase (EC 1.13.12.4)	1.05	C-compound and carbohydrate metabolism	Metabolism	2.515e-06	0.0010864
AFUA_5G04260	arginine transporter, putative		391.316	128.345	3.04895		#N/A	#N/A	#N/A	#N/A	#N/A	#N/A	#N/A	AFUA_5G04260	#N/A	#N/A	#N/A	#N/A	#N/A	#N/A
AFUA_5G05510	cyclin-dependent protein kinase Sgv1, putative		201.653	66.1872	3.04672		Serine/threonine-protein kinase bur1 (EC 2.7.11.22) (EC 2.7.11.23)	GO:0005575	cellular_component	CC	ND	3.3105e-7	9.3467e-05	AFUA_5G05510	#N/A	#N/A	#N/A	#N/A	#N/A	#N/A
AFUA_2G03080	WD repeat protein		31.958	10.5023	3.04294		#N/A	#N/A	#N/A	#N/A	#N/A	#N/A	#N/A	AFUA_2G03080	#N/A	#N/A	#N/A	#N/A	#N/A	#N/A
AFUA_7G06570	cation diffusion facilitator family metal ion transporter, putative		206.831	68.3275	3.02706		#N/A	#N/A	#N/A	#N/A	#N/A	#N/A	#N/A	AFUA_7G06570	Cation diffusion facilitator family metal ion transporter, putative	32.07	detoxification	Cell rescue, defense and virulence	8.7992e-06	0.0014049
AFUA_6G04750	Hsp70 nucleotide exchange factor (Fes1), putative		413.641	136.705	3.02579		#N/A	#N/A	#N/A	#N/A	#N/A	#N/A	#N/A	AFUA_6G04750	#N/A	#N/A	#N/A	#N/A	#N/A	#N/A
AFUA_2G02890	tRNA splicing 2' phosphotransferase 1		296.795	98.1554	3.02373		#N/A	#N/A	#N/A	#N/A	#N/A	#N/A	#N/A	AFUA_2G02890	#N/A	#N/A	#N/A	#N/A	#N/A	#N/A
AFUA_6G14270	conserved hypothetical protein		52.4913	17.4398	3.00986		Uncharacterized protein	GO:0005575	cellular_component	CC	ND	3.3105e-7	9.3467e-05	AFUA_6G14270	#N/A	#N/A	#N/A	#N/A	#N/A	#N/A
AFUA_8G05960	integral membrane protein		29.7924	9.89826	3.00986		Integral membrane protein	GO:0005575	cellular_component	CC	ND	3.3105e-7	9.3467e-05	AFUA_8G05960	#N/A	#N/A	#N/A	#N/A	#N/A	#N/A
AFUA_6G08000	general amidase GmdA, putative		23.4536	7.79225	3.00986		General amidase GmdA, putative	GO:0008152	metabolic process	BP	IEA	0.0026803	0.41559	AFUA_6G08000	General amidase GmdA, putative	1.06	lipid, fatty acid and isoprenoid metabolism	Metabolism	4.5362e-06	0.0010864
AFUA_4G09100	DnaJ domain protein		33.0695	10.9871	3.00986		#N/A	#N/A	#N/A	#N/A	#N/A	#N/A	#N/A	AFUA_4G09100	#N/A	#N/A	#N/A	#N/A	#N/A	#N/A
AFUA_6G13765	PHD finger protein		21.9731	7.30038	3.00986		PHD finger protein	GO:0005575	cellular_component	CC	ND	3.3105e-7	9.3467e-05	AFUA_6G13765	#N/A	#N/A	#N/A	#N/A	#N/A	#N/A
AFUA_7G06400	pectate lyase, putative		27.2177	9.04285	3.00986		Probable pectate lyase D (EC 4.2.2.2)	GO:0005975	carbohydrate metabolic process	BP	IEA	0.0048223	0.45384	AFUA_7G06400	Probable pectate lyase D (EC 4.2.2.2)	1.05	C-compound and carbohydrate metabolism	Metabolism	2.515e-06	0.0010864
AFUA_1G13270	6-hexanolactone hydrolase, putative		24.9581	8.29213	3.00986		6-hexanolactone hydrolase, putative	GO:0005575	cellular_component	CC	ND	3.3105e-7	9.3467e-05	AFUA_1G13270	6-hexanolactone hydrolase, putative	1.06	lipid, fatty acid and isoprenoid metabolism	Metabolism	4.5362e-06	0.0010864
AFUA_2G04220	homogentisate 1,2-dioxygenase (HmgA), putative		14.6976	4.88314	3.00986		Homogentisate 1,2-dioxygenase (HmgA), putative (EC 1.13.11.5)	GO:0055114	oxidation-reduction process	BP	IEA	7.8355e-8	6.6367e-05	AFUA_2G04220	#N/A	#N/A	#N/A	#N/A	#N/A	#N/A
AFUA_2G05240	conserved hypothetical protein		16.4935	5.47983	3.00986		#N/A	#N/A	#N/A	#N/A	#N/A	#N/A	#N/A	AFUA_2G05240	#N/A	#N/A	#N/A	#N/A	#N/A	#N/A
AFUA_1G13760	cell wall anchored protein, putative		35.3056	11.73	3.00986		Cell wall anchored protein, putative	GO:0005575	cellular_component	CC	ND	3.3105e-7	9.3467e-05	AFUA_1G13760	#N/A	#N/A	#N/A	#N/A	#N/A	#N/A
AFUA_2G13930	conserved hypothetical protein		38.4529	12.7757	3.00986		Uncharacterized protein	GO:0005575	cellular_component	CC	ND	3.3105e-7	9.3467e-05	AFUA_2G13930	#N/A	#N/A	#N/A	#N/A	#N/A	#N/A
AFUA_1G01770	short chain oxidoreductase/dehydrogenase, putative		23.2067	7.71022	3.00986		Short chain oxidoreductase/dehydrogenase, putative	GO:0055114	oxidation-reduction process	BP	IEA	7.8355e-8	6.6367e-05	AFUA_1G01770	Short chain oxidoreductase/dehydrogenase, putative	1.05	C-compound and carbohydrate metabolism	Metabolism	2.515e-06	0.0010864
AFUA_1G03080	ribosomal protein/carboxylic ester hydrolase (Ppe1), putative		47.13	15.6585	3.00986		#N/A	#N/A	#N/A	#N/A	#N/A	#N/A	#N/A	AFUA_1G03080	Protein phosphatase methylesterase 1 (PME-1) (EC 3.1.1.89)	1.06	lipid, fatty acid and isoprenoid metabolism	Metabolism	4.5362e-06	0.0010864
AFUA_2G14220	vacuolar protein sorting protein Vps66, putative		59.0527	19.6198	3.00986		Vacuolar protein sorting protein Vps66, putative	GO:0008152	metabolic process	BP	IEA	0.0026803	0.41559	AFUA_2G14220	#N/A	#N/A	#N/A	#N/A	#N/A	#N/A
AFUA_3G07490	conserved hypothetical protein		33.2357	11.0423	3.00986		Uncharacterized protein	GO:0005575	cellular_component	CC	ND	3.3105e-7	9.3467e-05	AFUA_3G07490	#N/A	#N/A	#N/A	#N/A	#N/A	#N/A
AFUA_7G04120	DUF636 domain protein		36.8463	12.2419	3.00986		DUF636 domain protein	GO:0005575	cellular_component	CC	ND	3.3105e-7	9.3467e-05	AFUA_7G04120	#N/A	#N/A	#N/A	#N/A	#N/A	#N/A
AFUA_2G08775	SET domain protein		20.6041	6.84552	3.00986		SET domain protein	GO:0005575	cellular_component	CC	ND	3.3105e-7	9.3467e-05	AFUA_2G08775	#N/A	#N/A	#N/A	#N/A	#N/A	#N/A
AFUA_2G02040	MFS transporter, putative		12.4088	4.12273	3.00986		#N/A	#N/A	#N/A	#N/A	#N/A	#N/A	#N/A	AFUA_2G02040	MFS transporter, putative	32.07	detoxification	Cell rescue, defense and virulence	8.7992e-06	0.0014049
AFUA_2G05320	calcium-proton exchanger, putative		29.1362	9.68024	3.00986		#N/A	#N/A	#N/A	#N/A	#N/A	#N/A	#N/A	AFUA_2G05320	Calcium-proton exchanger, putative	34.01.01.01	homeostasis of metal ions (Na, K, Ca etc.)	Interaction with the environment	0.0011954	0.067524
AFUA_2G15410	MFS sugar transporter, putative		12.8425	4.26682	3.00986		#N/A	#N/A	#N/A	#N/A	#N/A	#N/A	#N/A	AFUA_2G15410	MFS sugar transporter, putative	1.2	secondary metabolism	Metabolism	0.0024405	0.078984
AFUA_4G03430	C6 transcription factor, putative		10.302	3.42276	3.00986		#N/A	#N/A	#N/A	#N/A	#N/A	#N/A	#N/A	AFUA_4G03430	C6 transcription factor, putative	01.02.07.01	regulation of nitrogen metabolism	Metabolism	0.0024734	0.078984
AFUA_5G03740	isopenicillin N-CoA epimerase, putative		34.5374	11.4747	3.00986		Isopenicillin N-CoA epimerase, putative	GO:0005575	cellular_component	CC	ND	3.3105e-7	9.3467e-05	AFUA_5G03740	Isopenicillin N-CoA epimerase, putative	1.06	lipid, fatty acid and isoprenoid metabolism	Metabolism	4.5362e-06	0.0010864
AFUA_6G08350	retrograde regulation protein 2		11.4825	3.81495	3.00986		Retrograde regulation protein 2 (EC 3.6.1.11)	GO:0008152	metabolic process	BP	IEA	0.0026803	0.41559	AFUA_6G08350	#N/A	#N/A	#N/A	#N/A	#N/A	#N/A
AFUA_6G08480	aquaglyceroporin, putative		19.6842	6.53992	3.00986		#N/A	#N/A	#N/A	#N/A	#N/A	#N/A	#N/A	AFUA_6G08480	Aquaglyceroporin, putative	1.06	lipid, fatty acid and isoprenoid metabolism	Metabolism	4.5362e-06	0.0010864
AFUA_6G09260	sensor histidine kinase/response regulator, putative		4.92473	1.6362	3.00986		#N/A	#N/A	#N/A	#N/A	#N/A	#N/A	#N/A	AFUA_6G09260	#N/A	#N/A	#N/A	#N/A	#N/A	#N/A
AFUA_7G05850	hypothetical protein		13.2543	4.40363	3.00986		Uncharacterized protein	GO:0005575	cellular_component	CC	ND	3.3105e-7	9.3467e-05	AFUA_7G05850	#N/A	#N/A	#N/A	#N/A	#N/A	#N/A
AFUA_2G11120	conserved hypothetical protein		49.5424	16.46	3.00986		Uncharacterized protein	GO:0005575	cellular_component	CC	ND	3.3105e-7	9.3467e-05	AFUA_2G11120	#N/A	#N/A	#N/A	#N/A	#N/A	#N/A
AFUA_2G10720	conserved hypothetical protein		12.7929	4.25032	3.00986		Uncharacterized protein	GO:0005575	cellular_component	CC	ND	3.3105e-7	9.3467e-05	AFUA_2G10720	#N/A	#N/A	#N/A	#N/A	#N/A	#N/A
AFUA_1G08800	cytochrome P450 phenylacetate hydroxylase, putative		12.7929	4.25032	3.00986		Cytochrome P450 phenylacetate hydroxylase, putative (EC 1.14.-.-)	GO:0055114	oxidation-reduction process	BP	IEA	7.8355e-8	6.6367e-05	AFUA_1G08800	Cytochrome P450 phenylacetate hydroxylase, putative (EC 1.14.-.-)	1.2	secondary metabolism	Metabolism	0.0024405	0.078984
AFUA_4G13470	conserved hypothetical protein		193.814	64.3931	3.00986		Uncharacterized protein	GO:0005575	cellular_component	CC	ND	3.3105e-7	9.3467e-05	AFUA_4G13470	#N/A	#N/A	#N/A	#N/A	#N/A	#N/A
AFUA_2G16840	SWI-SNF complex subunit (Snf5), putative		102.241	34.1638	2.99266		#N/A	#N/A	#N/A	#N/A	#N/A	#N/A	#N/A	AFUA_2G16840	#N/A	#N/A	#N/A	#N/A	#N/A	#N/A
AFUA_2G11970	phospholipase A2 (PlaA), putative		163.638	54.7398	2.98938		Phospholipase A2 (PlaA), putative (EC 3.1.1.4)	GO:0008152	metabolic process	BP	IEA	0.0026803	0.41559	AFUA_2G11970	Phospholipase A2 (PlaA), putative (EC 3.1.1.4)	1.06	lipid, fatty acid and isoprenoid metabolism	Metabolism	4.5362e-06	0.0010864
AFUA_5G09350	conserved hypothetical protein		144.33	48.4469	2.97915		Uncharacterized protein	GO:0005575	cellular_component	CC	ND	3.3105e-7	9.3467e-05	AFUA_5G09350	#N/A	#N/A	#N/A	#N/A	#N/A	#N/A
AFUA_1G17120	translation elongation factor eEF-1B gamma subunit, putative		799.483	268.462	2.97801		#N/A	#N/A	#N/A	#N/A	#N/A	#N/A	#N/A	AFUA_1G17120	Translation elongation factor eEF-1B gamma subunit, putative	1.2	secondary metabolism	Metabolism	0.0024405	0.078984
AFUA_4G04670	calcium permease family membrane transporter		38.0304	12.7757	2.97678		#N/A	#N/A	#N/A	#N/A	#N/A	#N/A	#N/A	AFUA_4G04670	Calcium permease family membrane transporter	34.01.01.01	homeostasis of metal ions (Na, K, Ca etc.)	Interaction with the environment	0.0011954	0.067524
AFUA_3G04150	mitochondrial enoyl reductase, putative		300.835	101.06	2.97678		Mitochondrial enoyl reductase, putative	GO:0055114	oxidation-reduction process	BP	IEA	7.8355e-8	6.6367e-05	AFUA_3G04150	Mitochondrial enoyl reductase, putative	1.06	lipid, fatty acid and isoprenoid metabolism	Metabolism	4.5362e-06	0.0010864
AFUA_2G05680	conserved hypothetical protein		77.4462	26.0167	2.97678		Uncharacterized protein	GO:0005575	cellular_component	CC	ND	3.3105e-7	9.3467e-05	AFUA_2G05680	#N/A	#N/A	#N/A	#N/A	#N/A	#N/A
AFUA_3G11830	phosphoglucomutase PgmA		263.401	88.9241	2.96208		Phosphoglucomutase (PGM) (EC 5.4.2.2) (Glucose phosphomutase)	GO:0005975	carbohydrate metabolic process	BP	IEA	0.0048223	0.45384	AFUA_3G11830	Phosphoglucomutase (PGM) (EC 5.4.2.2) (Glucose phosphomutase)	1.05	C-compound and carbohydrate metabolism	Metabolism	2.515e-06	0.0010864
AFUA_3G00900	alpha-amylase, putative		104.235	35.1899	2.96208		Alpha-amylase, putative	GO:0005575	cellular_component	CC	ND	3.3105e-7	9.3467e-05	AFUA_3G00900	Alpha-amylase, putative	01.05.03	polysaccharide metabolism	Metabolism	0.012778	0.25186
AFUA_2G05340	1,3-beta-glucanosyltransferase, putative		361.416	122.079	2.96052		1,3-beta-glucanosyltransferase gel4 (EC 2.4.1.-) (Glucan elongating glucanosyltransferase 4)	GO:0005575	cellular_component	CC	ND	3.3105e-7	9.3467e-05	AFUA_2G05340	1,3-beta-glucanosyltransferase gel4 (EC 2.4.1.-) (Glucan elongating glucanosyltransferase 4)	1.06	lipid, fatty acid and isoprenoid metabolism	Metabolism	4.5362e-06	0.0010864
AFUA_4G10540	transcription regulator BDF1, putative		222.316	75.1816	2.95706		#N/A	#N/A	#N/A	#N/A	#N/A	#N/A	#N/A	AFUA_4G10540	Transcription regulator BDF1, putative	43.01.03.09	development of asco- basidio- or zygospore	Cell type differentiation	0.035951	0.41473
AFUA_2G07670	palmitoyltransferase SidR		104.983	35.5418	2.95378		Palmitoyltransferase akr1 (EC 2.3.1.225) (Ankyrin repeat-containing protein akr1)	GO:0005575	cellular_component	CC	ND	3.3105e-7	9.3467e-05	AFUA_2G07670	Palmitoyltransferase akr1 (EC 2.3.1.225) (Ankyrin repeat-containing protein akr1)	1.06	lipid, fatty acid and isoprenoid metabolism	Metabolism	4.5362e-06	0.0010864
AFUA_5G03600	nucleotide binding protein, putative		143.068	48.5233	2.94843		#N/A	#N/A	#N/A	#N/A	#N/A	#N/A	#N/A	AFUA_5G03600	Cytosolic Fe-S cluster assembly factor cfd1 (Cytosolic Fe-S cluster-deficient protein 1)	01.07.07	regulation of the metabolism of vitamins, cofactors, and prosthetic groups	Metabolism	0.036365	0.41473
AFUA_8G06554	carbonate dehydratase, putative		513.953	175.069	2.93573		Carbonate dehydratase, putative	GO:0005575	cellular_component	CC	ND	3.3105e-7	9.3467e-05	AFUA_8G06554	Carbonate dehydratase, putative	1.05	C-compound and carbohydrate metabolism	Metabolism	2.515e-06	0.0010864
AFUA_4G12590	conserved hypothetical protein		87.9646	30.0851	2.92386		#N/A	#N/A	#N/A	#N/A	#N/A	#N/A	#N/A	AFUA_4G12590	#N/A	#N/A	#N/A	#N/A	#N/A	#N/A
AFUA_2G11460	C6 finger domain protein, putative		15.1675	5.18747	2.92386		#N/A	#N/A	#N/A	#N/A	#N/A	#N/A	#N/A	AFUA_2G11460	#N/A	#N/A	#N/A	#N/A	#N/A	#N/A
AFUA_2G10550	C2H2 transcription factor (RfeC), putative		422.693	144.567	2.92386		#N/A	#N/A	#N/A	#N/A	#N/A	#N/A	#N/A	AFUA_2G10550	#N/A	#N/A	#N/A	#N/A	#N/A	#N/A
AFUA_6G13520	tryptophan synthase		34.8424	11.9166	2.92386		Tryptophan synthase (EC 4.2.1.20)	GO:0005575	cellular_component	CC	ND	3.3105e-7	9.3467e-05	AFUA_6G13520	#N/A	#N/A	#N/A	#N/A	#N/A	#N/A
AFUA_2G03300	conserved hypothetical protein		1822.2	627.832	2.90236		Uncharacterized protein	GO:0005575	cellular_component	CC	ND	3.3105e-7	9.3467e-05	AFUA_2G03300	#N/A	#N/A	#N/A	#N/A	#N/A	#N/A
AFUA_7G03670	conserved hypothetical protein		148.906	51.5341	2.88947		Uncharacterized protein	GO:0005575	cellular_component	CC	ND	3.3105e-7	9.3467e-05	AFUA_7G03670	#N/A	#N/A	#N/A	#N/A	#N/A	#N/A
AFUA_1G03380	UDP-N-acetylglucosaminyltransferase		27.1606	9.40789	2.88701		UDP-N-acetylglucosaminyltransferase	GO:0005575	cellular_component	CC	ND	3.3105e-7	9.3467e-05	AFUA_1G03380	UDP-N-acetylglucosaminyltransferase	1.05	C-compound and carbohydrate metabolism	Metabolism	2.515e-06	0.0010864
AFUA_6G10590	ubiquitin-protein ligase (Asi3), putative		55.3506	19.1963	2.8834		Ubiquitin-protein ligase (Asi3), putative	GO:0005575	cellular_component	CC	ND	3.3105e-7	9.3467e-05	AFUA_6G10590	#N/A	#N/A	#N/A	#N/A	#N/A	#N/A
AFUA_6G10120	zinc-binding oxidoreductase ToxD, putative		181.91	63.1441	2.88087		Zinc-binding oxidoreductase ToxD, putative	GO:0055114	oxidation-reduction process	BP	IEA	7.8355e-8	6.6367e-05	AFUA_6G10120	Zinc-binding oxidoreductase ToxD, putative	1.05	C-compound and carbohydrate metabolism	Metabolism	2.515e-06	0.0010864
AFUA_1G06840	vacuolar membrane PQ loop repeat protein		28.8943	10.0799	2.86653		#N/A	#N/A	#N/A	#N/A	#N/A	#N/A	#N/A	AFUA_1G06840	#N/A	#N/A	#N/A	#N/A	#N/A	#N/A
AFUA_8G01530	HHE domain protein		41.4405	14.4567	2.86653		#N/A	#N/A	#N/A	#N/A	#N/A	#N/A	#N/A	AFUA_8G01530	#N/A	#N/A	#N/A	#N/A	#N/A	#N/A
AFUA_4G09600	GPI anchored protein, putative		48.1572	16.7998	2.86653		GPI anchored protein, putative	GO:0005575	cellular_component	CC	ND	3.3105e-7	9.3467e-05	AFUA_4G09600	#N/A	#N/A	#N/A	#N/A	#N/A	#N/A
AFUA_6G07410	conserved hypothetical protein		24.2579	8.46244	2.86653		Uncharacterized protein	GO:0005575	cellular_component	CC	ND	3.3105e-7	9.3467e-05	AFUA_6G07410	#N/A	#N/A	#N/A	#N/A	#N/A	#N/A
AFUA_2G14990	tubulin subunit TubB		20.9036	7.2923	2.86653		#N/A	#N/A	#N/A	#N/A	#N/A	#N/A	#N/A	AFUA_2G14990	#N/A	#N/A	#N/A	#N/A	#N/A	#N/A
AFUA_2G15160	alpha-L-arabinofuranosidase A		14.3812	5.01693	2.86653		Alpha-L-arabinofuranosidase A (EC 3.2.1.55)	GO:0005575	cellular_component	CC	ND	3.3105e-7	9.3467e-05	AFUA_2G15160	Alpha-L-arabinofuranosidase A (EC 3.2.1.55)	01.05.03	polysaccharide metabolism	Metabolism	0.012778	0.25186
AFUA_2G15660	aldehyde dehydrogenase family protein, putative		140.125	48.8831	2.86653		Aldehyde dehydrogenase family protein, putative (EC 1.2.1.-)	GO:0055114	oxidation-reduction process	BP	IEA	7.8355e-8	6.6367e-05	AFUA_2G15660	Aldehyde dehydrogenase family protein, putative (EC 1.2.1.-)	1.05	C-compound and carbohydrate metabolism	Metabolism	2.515e-06	0.0010864
AFUA_5G13030	Apc13 domain protein		53.6843	18.728	2.86653		Apc13 domain protein	GO:0005575	cellular_component	CC	ND	3.3105e-7	9.3467e-05	AFUA_5G13030	#N/A	#N/A	#N/A	#N/A	#N/A	#N/A
AFUA_4G06060	conserved hypothetical protein		10.1053	3.52526	2.86653		Uncharacterized protein	GO:0005575	cellular_component	CC	ND	3.3105e-7	9.3467e-05	AFUA_4G06060	#N/A	#N/A	#N/A	#N/A	#N/A	#N/A
AFUA_2G17650	DUF907 domain protein		15.4134	5.37703	2.86653		DUF907 domain protein	GO:0005575	cellular_component	CC	ND	3.3105e-7	9.3467e-05	AFUA_2G17650	DUF907 domain protein	32.07	detoxification	Cell rescue, defense and virulence	8.7992e-06	0.0014049
AFUA_5G03770	lipase, putative		27.708	9.66604	2.86653		Lipase, putative (EC 3.1.1.3)	GO:0008152	metabolic process	BP	IEA	0.0026803	0.41559	AFUA_5G03770	Lipase, putative (EC 3.1.1.3)	1.06	lipid, fatty acid and isoprenoid metabolism	Metabolism	4.5362e-06	0.0010864
AFUA_2G17040	conserved hypothetical protein		9.92483	3.46231	2.86653		Uncharacterized protein	GO:0005575	cellular_component	CC	ND	3.3105e-7	9.3467e-05	AFUA_2G17040	#N/A	#N/A	#N/A	#N/A	#N/A	#N/A
AFUA_1G14620	Fibronectin type III domain protein		164.398	57.5562	2.8563		Fibronectin type III domain protein	GO:0005575	cellular_component	CC	ND	3.3105e-7	9.3467e-05	AFUA_1G14620	#N/A	#N/A	#N/A	#N/A	#N/A	#N/A
AFUA_5G02500	conserved hypothetical protein		800.225	280.282	2.85507		Uncharacterized protein	GO:0005575	cellular_component	CC	ND	3.3105e-7	9.3467e-05	AFUA_5G02500	#N/A	#N/A	#N/A	#N/A	#N/A	#N/A
AFUA_8G07200	amino acid transporter, putative		165.447	57.9487	2.85507		Amino acid transporter, putative	GO:0005575	cellular_component	CC	ND	3.3105e-7	9.3467e-05	AFUA_8G07200	Amino acid transporter, putative	1.2	secondary metabolism	Metabolism	0.0024405	0.078984
AFUA_6G00300	serine palmitoyltransferase 1, putative		96.9465	33.9991	2.85145		Serine palmitoyltransferase 1, putative (EC 2.3.1.50)	GO:0005575	cellular_component	CC	ND	3.3105e-7	9.3467e-05	AFUA_6G00300	Serine palmitoyltransferase 1, putative (EC 2.3.1.50)	1.06	lipid, fatty acid and isoprenoid metabolism	Metabolism	4.5362e-06	0.0010864
AFUA_2G13480	conserved hypothetical protein		130.478	45.7794	2.85015		Uncharacterized protein	GO:0005575	cellular_component	CC	ND	3.3105e-7	9.3467e-05	AFUA_2G13480	#N/A	#N/A	#N/A	#N/A	#N/A	#N/A
AFUA_4G04502	flocculation suppression protein		155.317	54.5591	2.84676		#N/A	#N/A	#N/A	#N/A	#N/A	#N/A	#N/A	AFUA_4G04502	#N/A	#N/A	#N/A	#N/A	#N/A	#N/A
AFUA_7G04710	NF-X1 finger transcription factor, putative		106.45	37.4232	2.84448		#N/A	#N/A	#N/A	#N/A	#N/A	#N/A	#N/A	AFUA_7G04710	#N/A	#N/A	#N/A	#N/A	#N/A	#N/A
AFUA_6G05010	C6 transcription factor, putative		76.9059	27.1483	2.83281		#N/A	#N/A	#N/A	#N/A	#N/A	#N/A	#N/A	AFUA_6G05010	#N/A	#N/A	#N/A	#N/A	#N/A	#N/A
AFUA_6G06800	peptidase, putative		246.388	87.1989	2.82558		Probable carboxypeptidase AFUA_6G06800 (EC 3.4.17.-) (Peptidase M20 domain-containing protein AFUA_6G06800)	GO:0005575	cellular_component	CC	ND	3.3105e-7	9.3467e-05	AFUA_6G06800	#N/A	#N/A	#N/A	#N/A	#N/A	#N/A
AFUA_2G10540	conserved hypothetical protein		101.549	35.939	2.82558		Uncharacterized protein	GO:0005575	cellular_component	CC	ND	3.3105e-7	9.3467e-05	AFUA_2G10540	#N/A	#N/A	#N/A	#N/A	#N/A	#N/A
AFUA_2G01810	conserved hypothetical protein		164.321	58.3854	2.81441		Uncharacterized protein	GO:0005575	cellular_component	CC	ND	3.3105e-7	9.3467e-05	AFUA_2G01810	#N/A	#N/A	#N/A	#N/A	#N/A	#N/A
AFUA_2G12560	pterin-4-alpha-carbinolamine dehydratase family protein		126.447	44.9285	2.81441		Pterin-4-alpha-carbinolamine dehydratase family protein	GO:0005575	cellular_component	CC	ND	3.3105e-7	9.3467e-05	AFUA_2G12560	#N/A	#N/A	#N/A	#N/A	#N/A	#N/A
AFUA_4G10200	transcription factor RfeF, putative		292.119	104.02	2.80831		#N/A	#N/A	#N/A	#N/A	#N/A	#N/A	#N/A	AFUA_4G10200	#N/A	#N/A	#N/A	#N/A	#N/A	#N/A
AFUA_2G05710	conserved hypothetical protein		111.582	39.7627	2.80619		Uncharacterized protein	GO:0005575	cellular_component	CC	ND	3.3105e-7	9.3467e-05	AFUA_2G05710	#N/A	#N/A	#N/A	#N/A	#N/A	#N/A
AFUA_1G16480	acid phosphatase, putative		347.967	124.048	2.80511		#N/A	#N/A	#N/A	#N/A	#N/A	#N/A	#N/A	AFUA_1G16480	Acid phosphatase, putative	1.06	lipid, fatty acid and isoprenoid metabolism	Metabolism	4.5362e-06	0.0010864
AFUA_1G15340	poly(A) polymerase Pap		84.5643	30.257	2.79487		#N/A	#N/A	#N/A	#N/A	#N/A	#N/A	#N/A	AFUA_1G15340	#N/A	#N/A	#N/A	#N/A	#N/A	#N/A
AFUA_8G04070	glucosamine-6-phosphate deaminase, putative		33.7444	12.0737	2.79487		Glucosamine-6-phosphate deaminase, putative (EC 3.5.99.6)	GO:0005575	cellular_component	CC	ND	3.3105e-7	9.3467e-05	AFUA_8G04070	Glucosamine-6-phosphate deaminase, putative (EC 3.5.99.6)	1.05	C-compound and carbohydrate metabolism	Metabolism	2.515e-06	0.0010864
AFUA_2G16540	C2H2 finger domain protein, putative		31.0176	11.098	2.79487		C2H2 finger domain protein, putative	GO:0005575	cellular_component	CC	ND	3.3105e-7	9.3467e-05	AFUA_2G16540	#N/A	#N/A	#N/A	#N/A	#N/A	#N/A
AFUA_5G04020	DNA damage repair protein (Rad9), putative		18.3465	6.56434	2.79487		DNA damage repair protein (Rad9), putative	GO:0005575	cellular_component	CC	ND	3.3105e-7	9.3467e-05	AFUA_5G04020	#N/A	#N/A	#N/A	#N/A	#N/A	#N/A
AFUA_7G01670	MFS transporter Fmp42, putative		20.7834	7.43626	2.79487		#N/A	#N/A	#N/A	#N/A	#N/A	#N/A	#N/A	AFUA_7G01670	MFS transporter Fmp42, putative	1.2	secondary metabolism	Metabolism	0.0024405	0.078984
AFUA_3G09990	conserved hypothetical protein		446.536	160.542	2.78143		#N/A	#N/A	#N/A	#N/A	#N/A	#N/A	#N/A	AFUA_3G09990	#N/A	#N/A	#N/A	#N/A	#N/A	#N/A
AFUA_7G01270	DNA-directed polymerase kappa, putative		89.1072	32.1573	2.77098		#N/A	#N/A	#N/A	#N/A	#N/A	#N/A	#N/A	AFUA_7G01270	#N/A	#N/A	#N/A	#N/A	#N/A	#N/A
AFUA_1G06071	LMBR1 domain protein		80.3533	28.9981	2.77098		#N/A	#N/A	#N/A	#N/A	#N/A	#N/A	#N/A	AFUA_1G06071	#N/A	#N/A	#N/A	#N/A	#N/A	#N/A
AFUA_1G14920	peptidase D, putative		56.1485	20.263	2.77098		Probable Xaa-Pro aminopeptidase AFUA_1G14920 (EC 3.4.11.9) (Aminoacylproline aminopeptidase) (Prolidase)	GO:0005575	cellular_component	CC	ND	3.3105e-7	9.3467e-05	AFUA_1G14920	#N/A	#N/A	#N/A	#N/A	#N/A	#N/A
AFUA_6G03620	FAD/FMN-containing isoamyl alcohol oxidase MreA		201.523	72.991	2.76092		FAD/FMN-containing isoamyl alcohol oxidase MreA	GO:0055114	oxidation-reduction process	BP	IEA	7.8355e-8	6.6367e-05	AFUA_6G03620	FAD/FMN-containing isoamyl alcohol oxidase MreA	1.05	C-compound and carbohydrate metabolism	Metabolism	2.515e-06	0.0010864
AFUA_6G09310	class V chitinase, putative		128.654	46.6508	2.7578		Class V chitinase, putative (EC 3.2.1.14)	GO:0005575	cellular_component	CC	ND	3.3105e-7	9.3467e-05	AFUA_6G09310	Class V chitinase, putative (EC 3.2.1.14)	1.05	C-compound and carbohydrate metabolism	Metabolism	2.515e-06	0.0010864
AFUA_1G02570	aspartyl-tRNA synthetase, cytoplasmic		204.317	74.1743	2.75456		#N/A	#N/A	#N/A	#N/A	#N/A	#N/A	#N/A	AFUA_1G02570	#N/A	#N/A	#N/A	#N/A	#N/A	#N/A
AFUA_6G02830	conserved hypothetical protein		230.802	83.8707	2.75187		Uncharacterized protein	GO:0055114	oxidation-reduction process	BP	IEA	7.8355e-8	6.6367e-05	AFUA_6G02830	#N/A	#N/A	#N/A	#N/A	#N/A	#N/A
AFUA_2G04150	C6 transcription factor, putative		16.6309	6.04349	2.75187		#N/A	#N/A	#N/A	#N/A	#N/A	#N/A	#N/A	AFUA_2G04150	C6 transcription factor, putative	1.2	secondary metabolism	Metabolism	0.0024405	0.078984
AFUA_5G07265	conserved hypothetical protein		23.1864	8.42566	2.75187		Uncharacterized protein	GO:0005575	cellular_component	CC	ND	3.3105e-7	9.3467e-05	AFUA_5G07265	#N/A	#N/A	#N/A	#N/A	#N/A	#N/A
AFUA_3G08710	protein kinase domain-containing protein		109.547	39.8082	2.75187		Protein kinase domain-containing protein	GO:0005575	cellular_component	CC	ND	3.3105e-7	9.3467e-05	AFUA_3G08710	#N/A	#N/A	#N/A	#N/A	#N/A	#N/A
AFUA_5G09310	Bax Inhibitor family protein		223.137	81.0854	2.75187		#N/A	#N/A	#N/A	#N/A	#N/A	#N/A	#N/A	AFUA_5G09310	#N/A	#N/A	#N/A	#N/A	#N/A	#N/A
AFUA_6G02680	ankyrin repeat and BTB/POZ domain protein		23.996	8.71989	2.75187		#N/A	#N/A	#N/A	#N/A	#N/A	#N/A	#N/A	AFUA_6G02680	#N/A	#N/A	#N/A	#N/A	#N/A	#N/A
AFUA_6G07530	bZIP transcription factor, putative		53.7989	19.5499	2.75187		BZIP transcription factor, putative	GO:0005575	cellular_component	CC	ND	3.3105e-7	9.3467e-05	AFUA_6G07530	#N/A	#N/A	#N/A	#N/A	#N/A	#N/A
AFUA_3G06140	cytoskeleton assembly control protein Sla2, putative		126.703	46.3056	2.73624		#N/A	#N/A	#N/A	#N/A	#N/A	#N/A	#N/A	AFUA_3G06140	Cytoskeleton assembly control protein Sla2, putative	40.10.02.04	regulation of apoptosis	Cell fate	0.034876	0.41473
AFUA_5G02460	conserved hypothetical protein		53.1665	19.4305	2.73624		Uncharacterized protein	GO:0005575	cellular_component	CC	ND	3.3105e-7	9.3467e-05	AFUA_5G02460	#N/A	#N/A	#N/A	#N/A	#N/A	#N/A
AFUA_5G03290	conserved hypothetical protein		206.633	75.5724	2.73423		Uncharacterized protein	GO:0005575	cellular_component	CC	ND	3.3105e-7	9.3467e-05	AFUA_5G03290	#N/A	#N/A	#N/A	#N/A	#N/A	#N/A
AFUA_1G02980	6-phosphogluconolactonase, putative		383.621	140.436	2.73164		6-phosphogluconolactonase, putative (EC 3.1.1.31)	GO:0005975	carbohydrate metabolic process	BP	IEA	0.0048223	0.45384	AFUA_1G02980	#N/A	#N/A	#N/A	#N/A	#N/A	#N/A
AFUA_5G11100	DUF775 domain protein		741.82	272.407	2.72321		#N/A	#N/A	#N/A	#N/A	#N/A	#N/A	#N/A	AFUA_5G11100	#N/A	#N/A	#N/A	#N/A	#N/A	#N/A
AFUA_3G11970	C2H2 transcription factor PacC, putative		79.5511	29.2123	2.72321		#N/A	#N/A	#N/A	#N/A	#N/A	#N/A	#N/A	AFUA_3G11970	pH-response transcription factor pacC/RIM101	34.01.01.01	homeostasis of metal ions (Na, K, Ca etc.)	Interaction with the environment	0.0011954	0.067524
AFUA_6G12190	conserved hypothetical protein		51.4385	18.8889	2.72321		Uncharacterized protein	GO:0005575	cellular_component	CC	ND	3.3105e-7	9.3467e-05	AFUA_6G12190	#N/A	#N/A	#N/A	#N/A	#N/A	#N/A
AFUA_3G04060	SNF7 family protein Fti1/Did2, putative		85.4859	31.3916	2.72321		#N/A	#N/A	#N/A	#N/A	#N/A	#N/A	#N/A	AFUA_3G04060	#N/A	#N/A	#N/A	#N/A	#N/A	#N/A
AFUA_2G16960	CAF1 family ribonuclease, putative		31.2753	11.4847	2.72321		#N/A	#N/A	#N/A	#N/A	#N/A	#N/A	#N/A	AFUA_2G16960	#N/A	#N/A	#N/A	#N/A	#N/A	#N/A
AFUA_4G10950	3-ketoacyl-coA thiolase peroxisomal A precursor		42.7429	15.6958	2.72321		3-ketoacyl-coA thiolase peroxisomal A (EC 2.3.1.9)	GO:0008152	metabolic process	BP	IEA	0.0026803	0.41559	AFUA_4G10950	3-ketoacyl-coA thiolase peroxisomal A (EC 2.3.1.9)	1.06	lipid, fatty acid and isoprenoid metabolism	Metabolism	4.5362e-06	0.0010864
AFUA_1G11800	HLH transcription factor, putative		44.8801	16.4806	2.72321		HLH transcription factor, putative	GO:0005575	cellular_component	CC	ND	3.3105e-7	9.3467e-05	AFUA_1G11800	#N/A	#N/A	#N/A	#N/A	#N/A	#N/A
AFUA_1G10040	HMG box protein, putative		96.8465	35.708	2.71218		HMG box protein, putative	GO:0005575	cellular_component	CC	ND	3.3105e-7	9.3467e-05	AFUA_1G10040	#N/A	#N/A	#N/A	#N/A	#N/A	#N/A
AFUA_5G12580	GTP binding protein (GTPBP1), putative		67.7087	25.0519	2.70273		GTP binding protein (GTPBP1), putative	GO:0005575	cellular_component	CC	ND	3.3105e-7	9.3467e-05	AFUA_5G12580	#N/A	#N/A	#N/A	#N/A	#N/A	#N/A
AFUA_6G08570	DNA damage repair protein Mus42, putative		17.997	6.65883	2.70273		#N/A	#N/A	#N/A	#N/A	#N/A	#N/A	#N/A	AFUA_6G08570	#N/A	#N/A	#N/A	#N/A	#N/A	#N/A
AFUA_4G13590	conserved hypothetical protein		47.3498	17.5192	2.70273		Uncharacterized protein	GO:0005575	cellular_component	CC	ND	3.3105e-7	9.3467e-05	AFUA_4G13590	#N/A	#N/A	#N/A	#N/A	#N/A	#N/A
AFUA_1G12350	SCP-like extracellular protein, putative		64.7556	23.9593	2.70273		SCP-like extracellular protein, putative	GO:0005575	cellular_component	CC	ND	3.3105e-7	9.3467e-05	AFUA_1G12350	#N/A	#N/A	#N/A	#N/A	#N/A	#N/A
AFUA_1G03040	conserved hypothetical protein		1037.78	384.247	2.70081		Uncharacterized protein	GO:0005575	cellular_component	CC	ND	3.3105e-7	9.3467e-05	AFUA_1G03040	#N/A	#N/A	#N/A	#N/A	#N/A	#N/A
AFUA_5G06270	5-aminolevulinic acid synthase HemA		568.97	210.828	2.69874		5-aminolevulinate synthase (EC 2.3.1.37) (5-aminolevulinic acid synthase) (Delta-ALA synthase) (Delta-aminolevulinate synthase)	GO:0008152	metabolic process	BP	IEA	0.0026803	0.41559	AFUA_5G06270	#N/A	#N/A	#N/A	#N/A	#N/A	#N/A
AFUA_1G12020	arrestin domain protein		170.42	63.361	2.68966		#N/A	#N/A	#N/A	#N/A	#N/A	#N/A	#N/A	AFUA_1G12020	Arrestin domain protein	32.07	detoxification	Cell rescue, defense and virulence	8.7992e-06	0.0014049
AFUA_3G02250	3-beta hydroxysteroid dehydrogenase/isomerase family protein		69.0675	25.7007	2.68737		3-beta hydroxysteroid dehydrogenase/isomerase family protein (EC 1.1.1.-)	GO:0055114	oxidation-reduction process	BP	IEA	7.8355e-8	6.6367e-05	AFUA_3G02250	3-beta hydroxysteroid dehydrogenase/isomerase family protein (EC 1.1.1.-)	1.05	C-compound and carbohydrate metabolism	Metabolism	2.515e-06	0.0010864
AFUA_6G04060	conserved hypothetical protein		32.0069	11.9101	2.68737		Uncharacterized protein	GO:0005575	cellular_component	CC	ND	3.3105e-7	9.3467e-05	AFUA_6G04060	#N/A	#N/A	#N/A	#N/A	#N/A	#N/A
AFUA_2G00320	sterol delta 5,6-desaturase, putative		70.3009	26.1597	2.68737		Sterol delta 5,6-desaturase, putative	GO:0055114	oxidation-reduction process	BP	IEA	7.8355e-8	6.6367e-05	AFUA_2G00320	Sterol delta 5,6-desaturase, putative	1.06	lipid, fatty acid and isoprenoid metabolism	Metabolism	4.5362e-06	0.0010864
AFUA_3G06070	histone H1		114.112	42.4621	2.68737		#N/A	#N/A	#N/A	#N/A	#N/A	#N/A	#N/A	AFUA_3G06070	#N/A	#N/A	#N/A	#N/A	#N/A	#N/A
AFUA_5G10660	pentatricopeptide repeat protein		247.901	92.3501	2.68436		Pentatricopeptide repeat protein	GO:0005575	cellular_component	CC	ND	3.3105e-7	9.3467e-05	AFUA_5G10660	#N/A	#N/A	#N/A	#N/A	#N/A	#N/A
AFUA_7G04700	conserved hypothetical portein		185.017	68.9303	2.68412		Conserved hypothetical portein	GO:0005575	cellular_component	CC	ND	3.3105e-7	9.3467e-05	AFUA_7G04700	#N/A	#N/A	#N/A	#N/A	#N/A	#N/A
AFUA_4G03990	membrane-spanning ATPase, putative		119.23	44.4715	2.68105		#N/A	#N/A	#N/A	#N/A	#N/A	#N/A	#N/A	AFUA_4G03990	#N/A	#N/A	#N/A	#N/A	#N/A	#N/A
AFUA_3G09610	histone acetyltransferase (MysT1), putative		74.3136	27.7763	2.67543		Histone acetyltransferase (MysT1), putative	GO:0008152	metabolic process	BP	IEA	0.0026803	0.41559	AFUA_3G09610	Histone acetyltransferase (MysT1), putative	1.06	lipid, fatty acid and isoprenoid metabolism	Metabolism	4.5362e-06	0.0010864
AFUA_1G09530	conserved hypothetical protein		36.4905	13.6391	2.67543		Uncharacterized protein	GO:0005575	cellular_component	CC	ND	3.3105e-7	9.3467e-05	AFUA_1G09530	#N/A	#N/A	#N/A	#N/A	#N/A	#N/A
AFUA_4G13740	metal homeostatis protein bsd2		124.711	46.7012	2.6704		Metal homeostatis protein bsd2	GO:0005575	cellular_component	CC	ND	3.3105e-7	9.3467e-05	AFUA_4G13740	Metal homeostatis protein bsd2	32.07	detoxification	Cell rescue, defense and virulence	8.7992e-06	0.0014049
AFUA_4G09950	conserved hypothetical protein		279.158	104.877	2.66178		#N/A	#N/A	#N/A	#N/A	#N/A	#N/A	#N/A	AFUA_4G09950	#N/A	#N/A	#N/A	#N/A	#N/A	#N/A
AFUA_4G03450	NmrA-like family protein		205.27	77.2254	2.65806		NmrA-like family protein	GO:0005575	cellular_component	CC	ND	3.3105e-7	9.3467e-05	AFUA_4G03450	#N/A	#N/A	#N/A	#N/A	#N/A	#N/A
AFUA_7G01290	conserved hypothetical protein		109.082	41.0383	2.65806		Uncharacterized protein	GO:0005575	cellular_component	CC	ND	3.3105e-7	9.3467e-05	AFUA_7G01290	#N/A	#N/A	#N/A	#N/A	#N/A	#N/A
AFUA_2G01990	signal recognition particle 14kD protein, putative		249.709	94.1749	2.65154		#N/A	#N/A	#N/A	#N/A	#N/A	#N/A	#N/A	AFUA_2G01990	#N/A	#N/A	#N/A	#N/A	#N/A	#N/A
AFUA_2G02830	conserved hypothetical protein		76.1639	28.7244	2.65154		Uncharacterized protein	GO:0005575	cellular_component	CC	ND	3.3105e-7	9.3467e-05	AFUA_2G02830	#N/A	#N/A	#N/A	#N/A	#N/A	#N/A
AFUA_4G09910	conserved hypothetical protein		121.134	45.7794	2.64603		Uncharacterized protein	GO:0005575	cellular_component	CC	ND	3.3105e-7	9.3467e-05	AFUA_4G09910	#N/A	#N/A	#N/A	#N/A	#N/A	#N/A
AFUA_4G04130	mitochondrial ATPase (Afg1), putative		139.046	52.5977	2.64358		#N/A	#N/A	#N/A	#N/A	#N/A	#N/A	#N/A	AFUA_4G04130	#N/A	#N/A	#N/A	#N/A	#N/A	#N/A
AFUA_6G02710	lipase, putative		105.766	40.0855	2.63851		Lipase, putative (EC 3.1.1.-)	GO:0005575	cellular_component	CC	ND	3.3105e-7	9.3467e-05	AFUA_6G02710	#N/A	#N/A	#N/A	#N/A	#N/A	#N/A
AFUA_5G05910	conserved hypothetical protein		77.4951	29.4606	2.63047		Uncharacterized protein	GO:0005575	cellular_component	CC	ND	3.3105e-7	9.3467e-05	AFUA_5G05910	#N/A	#N/A	#N/A	#N/A	#N/A	#N/A
AFUA_4G03090	conserved hypothetical protein		179.55	68.4552	2.62288		Uncharacterized protein	GO:0005575	cellular_component	CC	ND	3.3105e-7	9.3467e-05	AFUA_4G03090	#N/A	#N/A	#N/A	#N/A	#N/A	#N/A
AFUA_4G07060	acyl-CoA thioester hydrolase, putative		147.488	56.2752	2.62083		Acyl-CoA thioester hydrolase, putative (EC 3.-.-.-)	GO:0005575	cellular_component	CC	ND	3.3105e-7	9.3467e-05	AFUA_4G07060	Acyl-CoA thioester hydrolase, putative (EC 3.-.-.-)	1.06	lipid, fatty acid and isoprenoid metabolism	Metabolism	4.5362e-06	0.0010864
AFUA_1G06820	conserved hypothetical protein		163.156	62.2978	2.61897		#N/A	#N/A	#N/A	#N/A	#N/A	#N/A	#N/A	AFUA_1G06820	#N/A	#N/A	#N/A	#N/A	#N/A	#N/A
AFUA_6G02070	phospholipid-translocating P-type ATPase domain-containing protein		43.8297	16.7464	2.61727		Phospholipid-translocating P-type ATPase domain-containing protein (EC 3.6.3.1)	GO:0008152	metabolic process	BP	IEA	0.0026803	0.41559	AFUA_6G02070	Phospholipid-translocating P-type ATPase domain-containing protein (EC 3.6.3.1)	01.06.06.11	tetracyclic and pentacyclic triterpenes (cholesterin, steroids and hopanoids) metabolism	Metabolism	0.03512	0.41473
AFUA_1G16220	C6 transcription factor, putative		108.208	41.4317	2.61173		#N/A	#N/A	#N/A	#N/A	#N/A	#N/A	#N/A	AFUA_1G16220	C6 transcription factor, putative	01.02.07.01	regulation of nitrogen metabolism	Metabolism	0.0024734	0.078984
AFUA_1G10610	conserved hypothetical protein		129.579	50.2266	2.57988		Uncharacterized protein	GO:0005575	cellular_component	CC	ND	3.3105e-7	9.3467e-05	AFUA_1G10610	#N/A	#N/A	#N/A	#N/A	#N/A	#N/A
AFUA_3G12140	conserved hypothetical protein		8.31241	3.22201	2.57988		Uncharacterized protein	GO:0005575	cellular_component	CC	ND	3.3105e-7	9.3467e-05	AFUA_3G12140	#N/A	#N/A	#N/A	#N/A	#N/A	#N/A
AFUA_2G01970	conserved hypothetical protein		6.01811	2.33271	2.57988		Uncharacterized protein	GO:0005575	cellular_component	CC	ND	3.3105e-7	9.3467e-05	AFUA_2G01970	#N/A	#N/A	#N/A	#N/A	#N/A	#N/A
AFUA_3G00760	GNAT family N-acetyltransferase, putative		18.1701	7.04299	2.57988		GNAT family N-acetyltransferase, putative	GO:0005575	cellular_component	CC	ND	3.3105e-7	9.3467e-05	AFUA_3G00760	#N/A	#N/A	#N/A	#N/A	#N/A	#N/A
AFUA_3G02360	FAD dependent oxidoreductase superfamily		6.45679	2.50275	2.57988		FAD dependent oxidoreductase superfamily	GO:0055114	oxidation-reduction process	BP	IEA	7.8355e-8	6.6367e-05	AFUA_3G02360	#N/A	#N/A	#N/A	#N/A	#N/A	#N/A
AFUA_3G12090	hypothetical protein		51.5369	19.9765	2.57988		Uncharacterized protein	GO:0005575	cellular_component	CC	ND	3.3105e-7	9.3467e-05	AFUA_3G12090	#N/A	#N/A	#N/A	#N/A	#N/A	#N/A
AFUA_3G14390	hypothetical protein		44.2896	17.1673	2.57988		Uncharacterized protein	GO:0005575	cellular_component	CC	ND	3.3105e-7	9.3467e-05	AFUA_3G14390	#N/A	#N/A	#N/A	#N/A	#N/A	#N/A
AFUA_4G07270	serine carboxypeptidase, putative		5.15369	1.99765	2.57988		Serine carboxypeptidase, putative (EC 3.4.16.-)	GO:0005575	cellular_component	CC	ND	3.3105e-7	9.3467e-05	AFUA_4G07270	#N/A	#N/A	#N/A	#N/A	#N/A	#N/A
AFUA_4G13300	conserved hypothetical protein		19.0878	7.3987	2.57988		Uncharacterized protein	GO:0005575	cellular_component	CC	ND	3.3105e-7	9.3467e-05	AFUA_4G13300	#N/A	#N/A	#N/A	#N/A	#N/A	#N/A
AFUA_5G10420	nitrate reductase, putative		5.52002	2.13964	2.57988		Nitrate reductase, putative (EC 1.7.1.1)	GO:0055114	oxidation-reduction process	BP	IEA	7.8355e-8	6.6367e-05	AFUA_5G10420	Nitrate reductase, putative (EC 1.7.1.1)	01.06.05	fatty acid metabolism	Metabolism	0.00056875	0.06568
AFUA_5G11245	PTH11-like integral membrane protein		11.2481	4.35995	2.57988		PTH11-like integral membrane protein	GO:0005575	cellular_component	CC	ND	3.3105e-7	9.3467e-05	AFUA_5G11245	#N/A	#N/A	#N/A	#N/A	#N/A	#N/A
AFUA_6G10810	homogentisate 1,2-dioxygenase, putative		5.79659	2.24684	2.57988		Homogentisate 1,2-dioxygenase, putative (EC 1.13.11.5)	GO:0055114	oxidation-reduction process	BP	IEA	7.8355e-8	6.6367e-05	AFUA_6G10810	#N/A	#N/A	#N/A	#N/A	#N/A	#N/A
AFUA_7G01440	conserved hypothetical protein		6.1089	2.3679	2.57988		Uncharacterized protein	GO:0005575	cellular_component	CC	ND	3.3105e-7	9.3467e-05	AFUA_7G01440	#N/A	#N/A	#N/A	#N/A	#N/A	#N/A
AFUA_7G03765	#N/A		75.253	29.1692	2.57988		#N/A	#N/A	#N/A	#N/A	#N/A	#N/A	#N/A	AFUA_7G03765	#N/A	#N/A	#N/A	#N/A	#N/A	#N/A
AFUA_8G01120	conserved hypothetical protein		10.4595	4.05427	2.57988		Uncharacterized protein	GO:0005575	cellular_component	CC	ND	3.3105e-7	9.3467e-05	AFUA_8G01120	#N/A	#N/A	#N/A	#N/A	#N/A	#N/A
AFUA_8G07150	arsenic resistance protein ArsH, putative		9.20302	3.56723	2.57988		Arsenic resistance protein ArsH, putative	GO:0055114	oxidation-reduction process	BP	IEA	7.8355e-8	6.6367e-05	AFUA_8G07150	#N/A	#N/A	#N/A	#N/A	#N/A	#N/A
AFUA_1G00540	0		2.66153	1.03165	2.57988		#N/A	#N/A	#N/A	#N/A	#N/A	#N/A	#N/A	AFUA_1G00540	#N/A	#N/A	#N/A	#N/A	#N/A	#N/A
AFUA_7G00690	aminotransferase, putative		14.4619	5.60565	2.57988		Aminotransferase, putative (EC 2.6.1.-)	GO:0005575	cellular_component	CC	ND	3.3105e-7	9.3467e-05	AFUA_7G00690	Aminotransferase, putative (EC 2.6.1.-)	1.2	secondary metabolism	Metabolism	0.0024405	0.078984
AFUA_1G13040	possible dual specificity protein phosphatase 3		17.2837	6.69943	2.57988		Possible dual specificity protein phosphatase 3	GO:0005575	cellular_component	CC	ND	3.3105e-7	9.3467e-05	AFUA_1G13040	#N/A	#N/A	#N/A	#N/A	#N/A	#N/A
AFUA_3G00250	salicylate hydroxylase, putative		6.94738	2.69291	2.57988		Salicylate hydroxylase, putative	GO:0055114	oxidation-reduction process	BP	IEA	7.8355e-8	6.6367e-05	AFUA_3G00250	Salicylate hydroxylase, putative	1.06	lipid, fatty acid and isoprenoid metabolism	Metabolism	4.5362e-06	0.0010864
AFUA_4G09370	conserved hypothetical protein		12.6354	4.89765	2.57988		Uncharacterized protein	GO:0005575	cellular_component	CC	ND	3.3105e-7	9.3467e-05	AFUA_4G09370	#N/A	#N/A	#N/A	#N/A	#N/A	#N/A
AFUA_5G08790	conserved hypothetical protein		9.77425	3.78864	2.57988		Uncharacterized protein	GO:0005575	cellular_component	CC	ND	3.3105e-7	9.3467e-05	AFUA_5G08790	#N/A	#N/A	#N/A	#N/A	#N/A	#N/A
AFUA_6G00400	conserved hypothetical protein		7.45929	2.89133	2.57988		Putative uncharacterized protein	GO:0005575	cellular_component	CC	ND	3.3105e-7	9.3467e-05	AFUA_6G00400	#N/A	#N/A	#N/A	#N/A	#N/A	#N/A
AFUA_7G00210	C6 transcription factor, putative		4.49926	1.74398	2.57988		#N/A	#N/A	#N/A	#N/A	#N/A	#N/A	#N/A	AFUA_7G00210	C6 transcription factor, putative	1.2	secondary metabolism	Metabolism	0.0024405	0.078984
AFUA_2G17400	C-3 sterol dehydrogenase/C-4 decarboxylase family protein		7.49876	2.90663	2.57988		C-3 sterol dehydrogenase/C-4 decarboxylase family protein (EC 1.1.1.-)	GO:0055114	oxidation-reduction process	BP	IEA	7.8355e-8	6.6367e-05	AFUA_2G17400	C-3 sterol dehydrogenase/C-4 decarboxylase family protein (EC 1.1.1.-)	1.06	lipid, fatty acid and isoprenoid metabolism	Metabolism	4.5362e-06	0.0010864
AFUA_6G00440	cation diffusion facilitator, putative		15.7766	6.11525	2.57988		#N/A	#N/A	#N/A	#N/A	#N/A	#N/A	#N/A	AFUA_6G00440	#N/A	#N/A	#N/A	#N/A	#N/A	#N/A
AFUA_1G05460	conserved hypothetical protein		34.7085	13.4536	2.57988		Uncharacterized protein	GO:0055114	oxidation-reduction process	BP	IEA	7.8355e-8	6.6367e-05	AFUA_1G05460	#N/A	#N/A	#N/A	#N/A	#N/A	#N/A
AFUA_5G10650	pyridoxamine phosphate oxidase, putative		192.172	74.4886	2.57988		Pyridoxamine phosphate oxidase, putative (EC 1.4.3.5)	GO:0055114	oxidation-reduction process	BP	IEA	7.8355e-8	6.6367e-05	AFUA_5G10650	Pyridoxamine phosphate oxidase, putative (EC 1.4.3.5)	1.06	lipid, fatty acid and isoprenoid metabolism	Metabolism	4.5362e-06	0.0010864
AFUA_8G06170	hypothetical protein		97.7425	37.8864	2.57988		Uncharacterized protein	GO:0005575	cellular_component	CC	ND	3.3105e-7	9.3467e-05	AFUA_8G06170	#N/A	#N/A	#N/A	#N/A	#N/A	#N/A
AFUA_7G06940	fungal specific transcription factor, putative		7.36242	2.85378	2.57988		#N/A	#N/A	#N/A	#N/A	#N/A	#N/A	#N/A	AFUA_7G06940	#N/A	#N/A	#N/A	#N/A	#N/A	#N/A
AFUA_1G15530	lactam utilization protein LamB		11.1596	4.32562	2.57988		Lactam utilization protein LamB	GO:0005575	cellular_component	CC	ND	3.3105e-7	9.3467e-05	AFUA_1G15530	Lactam utilization protein LamB	1.05	C-compound and carbohydrate metabolism	Metabolism	2.515e-06	0.0010864
AFUA_1G05470	3-oxo-5-alpha-steroid 4-dehydrogenase, putative		27.2551	10.5645	2.57988		3-oxo-5-alpha-steroid 4-dehydrogenase, putative	GO:0055114	oxidation-reduction process	BP	IEA	7.8355e-8	6.6367e-05	AFUA_1G05470	#N/A	#N/A	#N/A	#N/A	#N/A	#N/A
AFUA_1G14850	acyl-CoA dehydrogenase, putative		25.8861	10.0339	2.57988		Acyl-CoA dehydrogenase, putative (EC 1.3.99.-)	GO:0055114	oxidation-reduction process	BP	IEA	7.8355e-8	6.6367e-05	AFUA_1G14850	Acyl-CoA dehydrogenase, putative (EC 1.3.99.-)	1.06	lipid, fatty acid and isoprenoid metabolism	Metabolism	4.5362e-06	0.0010864
AFUA_5G06580	MFS multidrug transporter, putative		9.24806	3.58469	2.57988		#N/A	#N/A	#N/A	#N/A	#N/A	#N/A	#N/A	AFUA_5G06580	MFS multidrug transporter, putative	32.07	detoxification	Cell rescue, defense and virulence	8.7992e-06	0.0014049
AFUA_5G10460	conserved hypothetical protein		3.09109	1.19815	2.57988		Uncharacterized protein	GO:0005575	cellular_component	CC	ND	3.3105e-7	9.3467e-05	AFUA_5G10460	#N/A	#N/A	#N/A	#N/A	#N/A	#N/A
AFUA_3G13180	conserved hypothetical protein		27.3427	10.5985	2.57988		Uncharacterized protein	GO:0005575	cellular_component	CC	ND	3.3105e-7	9.3467e-05	AFUA_3G13180	#N/A	#N/A	#N/A	#N/A	#N/A	#N/A
AFUA_6G08840	beta-mannosidase		6.11549	2.37046	2.57988		Beta-mannosidase A (EC 3.2.1.25) (Mannanase A) (Mannase A)	GO:0005575	cellular_component	CC	ND	3.3105e-7	9.3467e-05	AFUA_6G08840	Beta-mannosidase A (EC 3.2.1.25) (Mannanase A) (Mannase A)	1.05	C-compound and carbohydrate metabolism	Metabolism	2.515e-06	0.0010864
AFUA_1G05920	conserved hypothetical protein		3.80985	1.47676	2.57988		Uncharacterized protein	GO:0005575	cellular_component	CC	ND	3.3105e-7	9.3467e-05	AFUA_1G05920	#N/A	#N/A	#N/A	#N/A	#N/A	#N/A
AFUA_6G04270	MFS sugar transporter, putative		30.8101	11.9425	2.57988		#N/A	#N/A	#N/A	#N/A	#N/A	#N/A	#N/A	AFUA_6G04270	MFS sugar transporter, putative	1.05	C-compound and carbohydrate metabolism	Metabolism	2.515e-06	0.0010864
AFUA_2G03910	ATP-depentend DNA helicase, putative		2.82887	1.09651	2.57988		ATP-depentend DNA helicase, putative (EC 3.6.1.-)	GO:0008152	metabolic process	BP	IEA	0.0026803	0.41559	AFUA_2G03910	#N/A	#N/A	#N/A	#N/A	#N/A	#N/A
AFUA_4G06640	acid sphingomyelinase, putative		13.5408	5.2486	2.57988		Acid sphingomyelinase, putative (EC 3.1.4.12)	GO:0005575	cellular_component	CC	ND	3.3105e-7	9.3467e-05	AFUA_4G06640	Acid sphingomyelinase, putative (EC 3.1.4.12)	1.06	lipid, fatty acid and isoprenoid metabolism	Metabolism	4.5362e-06	0.0010864
AFUA_5G04310	peroxisomal membrane protein Pmp47, putative		17.4433	6.76127	2.57988		#N/A	#N/A	#N/A	#N/A	#N/A	#N/A	#N/A	AFUA_5G04310	Peroxisomal membrane protein Pmp47, putative	1.06	lipid, fatty acid and isoprenoid metabolism	Metabolism	4.5362e-06	0.0010864
AFUA_3G07020	annexin ANXC4		9.58692	3.71603	2.57988		Annexin ANXC4	GO:0005575	cellular_component	CC	ND	3.3105e-7	9.3467e-05	AFUA_3G07020	Annexin ANXC4	20.09.16	cellular export and secretion	Cellular transport, transport facilitation and transport routes	0.00089546	0.066362
AFUA_2G01080	conserved hypothetical protein		15.3218	5.93896	2.57988		Uncharacterized protein	GO:0005575	cellular_component	CC	ND	3.3105e-7	9.3467e-05	AFUA_2G01080	#N/A	#N/A	#N/A	#N/A	#N/A	#N/A
AFUA_2G08060	involucrin repeat protein		2.5587	0.991792	2.57988		#N/A	#N/A	#N/A	#N/A	#N/A	#N/A	#N/A	AFUA_2G08060	#N/A	#N/A	#N/A	#N/A	#N/A	#N/A
AFUA_6G07020	SAM and PH domain protein (Boi1), putative		3.4908	1.35309	2.57988		SAM and PH domain protein (Boi1), putative	GO:0005575	cellular_component	CC	ND	3.3105e-7	9.3467e-05	AFUA_6G07020	#N/A	#N/A	#N/A	#N/A	#N/A	#N/A
AFUA_3G00640	conserved hypothetical protein		7.28671	2.82444	2.57988		#N/A	#N/A	#N/A	#N/A	#N/A	#N/A	#N/A	AFUA_3G00640	#N/A	#N/A	#N/A	#N/A	#N/A	#N/A
AFUA_8G04680	oxidoreductase, short-chain dehydrogenase/reductase family, putative		9.44844	3.66236	2.57988		Oxidoreductase, short-chain dehydrogenase/reductase family, putative	GO:0055114	oxidation-reduction process	BP	IEA	7.8355e-8	6.6367e-05	AFUA_8G04680	Oxidoreductase, short-chain dehydrogenase/reductase family, putative	1.06	lipid, fatty acid and isoprenoid metabolism	Metabolism	4.5362e-06	0.0010864
AFUA_2G01380	GNAT family N-acetyltransferase, putative		15.5743	6.03685	2.57988		GNAT family N-acetyltransferase, putative (EC 2.3.1.-)	GO:0008152	metabolic process	BP	IEA	0.0026803	0.41559	AFUA_2G01380	#N/A	#N/A	#N/A	#N/A	#N/A	#N/A
AFUA_2G01400	short chain dehydrogenase/oxidoreductase, putative		31.9684	12.3914	2.57988		Short chain dehydrogenase/oxidoreductase, putative (EC 1.-.-.-)	GO:0055114	oxidation-reduction process	BP	IEA	7.8355e-8	6.6367e-05	AFUA_2G01400	Short chain dehydrogenase/oxidoreductase, putative (EC 1.-.-.-)	1.05	C-compound and carbohydrate metabolism	Metabolism	2.515e-06	0.0010864
AFUA_3G00660	conserved hypothetical protein		298.372	115.653	2.57988		Uncharacterized protein	GO:0005575	cellular_component	CC	ND	3.3105e-7	9.3467e-05	AFUA_3G00660	#N/A	#N/A	#N/A	#N/A	#N/A	#N/A
AFUA_4G09330	conserved hypothetical protein		7.33385	2.84271	2.57988		Uncharacterized protein	GO:0005575	cellular_component	CC	ND	3.3105e-7	9.3467e-05	AFUA_4G09330	#N/A	#N/A	#N/A	#N/A	#N/A	#N/A
AFUA_2G00760	pectate lyase A		17.6058	6.82427	2.57988		Probable pectate lyase A (EC 4.2.2.2)	GO:0005575	cellular_component	CC	ND	3.3105e-7	9.3467e-05	AFUA_2G00760	Probable pectate lyase A (EC 4.2.2.2)	1.05	C-compound and carbohydrate metabolism	Metabolism	2.515e-06	0.0010864
AFUA_2G05720	conserved hypothetical protein		128.195	49.6903	2.57988		Uncharacterized protein	GO:0005575	cellular_component	CC	ND	3.3105e-7	9.3467e-05	AFUA_2G05720	#N/A	#N/A	#N/A	#N/A	#N/A	#N/A
AFUA_5G01810	conserved hypothetical protein		7.36242	2.85378	2.57988		Uncharacterized protein	GO:0005575	cellular_component	CC	ND	3.3105e-7	9.3467e-05	AFUA_5G01810	#N/A	#N/A	#N/A	#N/A	#N/A	#N/A
AFUA_6G13900	conserved hypothetical protein		13.4657	5.21951	2.57988		Uncharacterized protein	GO:0005575	cellular_component	CC	ND	3.3105e-7	9.3467e-05	AFUA_6G13900	#N/A	#N/A	#N/A	#N/A	#N/A	#N/A
AFUA_4G13670	WSC domain protein, putative		38.5651	14.9484	2.57988		#N/A	#N/A	#N/A	#N/A	#N/A	#N/A	#N/A	AFUA_4G13670	#N/A	#N/A	#N/A	#N/A	#N/A	#N/A
AFUA_4G13580	gamma-glutamyltranspeptidase		4.71636	1.82813	2.57988		Gamma-glutamyltranspeptidase (EC 2.3.2.2)	GO:0005575	cellular_component	CC	ND	3.3105e-7	9.3467e-05	AFUA_4G13580	Gamma-glutamyltranspeptidase (EC 2.3.2.2)	01.20.37.01	metabolism of thioredoxin, glutaredoxin, glutathion	Metabolism	0.034876	0.41473
AFUA_1G11910	conserved histidine-rich protein		11.5225	4.46629	2.57988		#N/A	#N/A	#N/A	#N/A	#N/A	#N/A	#N/A	AFUA_1G11910	#N/A	#N/A	#N/A	#N/A	#N/A	#N/A
AFUA_1G14510	ankyrin repeat protein		13.0263	5.0492	2.57988		#N/A	#N/A	#N/A	#N/A	#N/A	#N/A	#N/A	AFUA_1G14510	#N/A	#N/A	#N/A	#N/A	#N/A	#N/A
AFUA_4G01470	C6 finger domain protein, putative		11.278	4.37151	2.57988		#N/A	#N/A	#N/A	#N/A	#N/A	#N/A	#N/A	AFUA_4G01470	#N/A	#N/A	#N/A	#N/A	#N/A	#N/A
AFUA_6G09140	oxidoreductase, short-chain dehydrogenase/reductase family		10.8188	4.19354	2.57988		Oxidoreductase, short-chain dehydrogenase/reductase family (EC 1.1.1.100)	GO:0055114	oxidation-reduction process	BP	IEA	7.8355e-8	6.6367e-05	AFUA_6G09140	Oxidoreductase, short-chain dehydrogenase/reductase family (EC 1.1.1.100)	1.05	C-compound and carbohydrate metabolism	Metabolism	2.515e-06	0.0010864
AFUA_2G11240	UDP-N-acetyl-glucosamine-1-P transferase Alg7, putative		36.2627	14.0559	2.57988		UDP-N-acetyl-glucosamine-1-P transferase Alg7, putative (EC 2.7.8.15)	GO:0008152	metabolic process	BP	IEA	0.0026803	0.41559	AFUA_2G11240	UDP-N-acetyl-glucosamine-1-P transferase Alg7, putative (EC 2.7.8.15)	1.06	lipid, fatty acid and isoprenoid metabolism	Metabolism	4.5362e-06	0.0010864
AFUA_7G04200	conserved hypothetical protein		6.39849	2.48015	2.57988		Uncharacterized protein	GO:0005575	cellular_component	CC	ND	3.3105e-7	9.3467e-05	AFUA_7G04200	#N/A	#N/A	#N/A	#N/A	#N/A	#N/A
AFUA_5G05800	microsomal signal peptidase Spc12, putative		110.079	42.6682	2.57988		#N/A	#N/A	#N/A	#N/A	#N/A	#N/A	#N/A	AFUA_5G05800	#N/A	#N/A	#N/A	#N/A	#N/A	#N/A
AFUA_6G12780	conserved hypothetical protein		11.7129	4.54011	2.57988		#N/A	#N/A	#N/A	#N/A	#N/A	#N/A	#N/A	AFUA_6G12780	#N/A	#N/A	#N/A	#N/A	#N/A	#N/A
AFUA_5G13710	carboxylesterase, putative		4.77194	1.84967	2.57988		Carboxylesterase, putative (EC 3.1.1.-)	GO:0005575	cellular_component	CC	ND	3.3105e-7	9.3467e-05	AFUA_5G13710	Carboxylesterase, putative (EC 3.1.1.-)	1.06	lipid, fatty acid and isoprenoid metabolism	Metabolism	4.5362e-06	0.0010864
AFUA_6G10290	GPI-anchored cell wall protein Pst1, putative		13.9289	5.39905	2.57988		#N/A	#N/A	#N/A	#N/A	#N/A	#N/A	#N/A	AFUA_6G10290	#N/A	#N/A	#N/A	#N/A	#N/A	#N/A
AFUA_4G06510	conserved hypothetical protein		37.1336	14.3935	2.57988		Uncharacterized protein	GO:0005575	cellular_component	CC	ND	3.3105e-7	9.3467e-05	AFUA_4G06510	#N/A	#N/A	#N/A	#N/A	#N/A	#N/A
AFUA_8G04060	beta-N-acetylglucosaminidase, putative		66.9095	25.9351	2.57988		Beta-N-acetylglucosaminidase, putative (EC 3.2.1.-)	GO:0005575	cellular_component	CC	ND	3.3105e-7	9.3467e-05	AFUA_8G04060	Beta-N-acetylglucosaminidase, putative (EC 3.2.1.-)	1.05	C-compound and carbohydrate metabolism	Metabolism	2.515e-06	0.0010864
AFUA_1G04670	PSP1 domain protein		35.3513	13.7027	2.57988		PSP1 domain protein	GO:0005575	cellular_component	CC	ND	3.3105e-7	9.3467e-05	AFUA_1G04670	#N/A	#N/A	#N/A	#N/A	#N/A	#N/A
AFUA_1G03580	conserved hypothetical protein		14.3885	5.57719	2.57988		Uncharacterized protein	GO:0005575	cellular_component	CC	ND	3.3105e-7	9.3467e-05	AFUA_1G03580	#N/A	#N/A	#N/A	#N/A	#N/A	#N/A
AFUA_1G04390	cytochrome P450 monooxygenase, putative		10.7369	4.16177	2.57988		Cytochrome P450 monooxygenase, putative (EC 1.14.14.1)	GO:0055114	oxidation-reduction process	BP	IEA	7.8355e-8	6.6367e-05	AFUA_1G04390	Cytochrome P450 monooxygenase, putative (EC 1.14.14.1)	1.2	secondary metabolism	Metabolism	0.0024405	0.078984
AFUA_1G06450	3-beta hydroxysteroid dehydrogenase/isomerase family protein, putative		63.8931	24.7659	2.57988		3-beta hydroxysteroid dehydrogenase/isomerase family protein, putative (EC 1.1.1.-)	GO:0055114	oxidation-reduction process	BP	IEA	7.8355e-8	6.6367e-05	AFUA_1G06450	3-beta hydroxysteroid dehydrogenase/isomerase family protein, putative (EC 1.1.1.-)	1.06	lipid, fatty acid and isoprenoid metabolism	Metabolism	4.5362e-06	0.0010864
AFUA_1G13110	4-coumarate-CoA ligase, putative		14.9975	5.81326	2.57988		4-coumarate-CoA ligase, putative (EC 6.2.1.12)	GO:0005575	cellular_component	CC	ND	3.3105e-7	9.3467e-05	AFUA_1G13110	4-coumarate-CoA ligase, putative (EC 6.2.1.12)	1.2	secondary metabolism	Metabolism	0.0024405	0.078984
AFUA_1G16630	short chain dehydrogenase family protein		51.3812	19.9161	2.57988		Short chain dehydrogenase family protein (EC 1.-.-.-)	GO:0055114	oxidation-reduction process	BP	IEA	7.8355e-8	6.6367e-05	AFUA_1G16630	Short chain dehydrogenase family protein (EC 1.-.-.-)	1.05	C-compound and carbohydrate metabolism	Metabolism	2.515e-06	0.0010864
AFUA_2G00960	NACHT domain protein		4.82884	1.87173	2.57988		NACHT domain protein	GO:0005575	cellular_component	CC	ND	3.3105e-7	9.3467e-05	AFUA_2G00960	#N/A	#N/A	#N/A	#N/A	#N/A	#N/A
AFUA_2G02740	hypothetical protein		18.8969	7.32471	2.57988		Uncharacterized protein	GO:0005575	cellular_component	CC	ND	3.3105e-7	9.3467e-05	AFUA_2G02740	#N/A	#N/A	#N/A	#N/A	#N/A	#N/A
AFUA_2G07590	beta-1,6-glucan boisynthesis protein (Knh1), putative		10.902	4.2258	2.57988		#N/A	#N/A	#N/A	#N/A	#N/A	#N/A	#N/A	AFUA_2G07590	#N/A	#N/A	#N/A	#N/A	#N/A	#N/A
AFUA_2G12830	UDP-glucosyl transferase family protein		5.40941	2.09677	2.57988		UDP-glucosyl transferase family protein	GO:0005575	cellular_component	CC	ND	3.3105e-7	9.3467e-05	AFUA_2G12830	UDP-glucosyl transferase family protein	1.05	C-compound and carbohydrate metabolism	Metabolism	2.515e-06	0.0010864
AFUA_2G13170	OB-fold nucleic acid binding domain		10.3074	3.9953	2.57988		OB-fold nucleic acid binding domain	GO:0005575	cellular_component	CC	ND	3.3105e-7	9.3467e-05	AFUA_2G13170	#N/A	#N/A	#N/A	#N/A	#N/A	#N/A
AFUA_2G14290	translation initiation factor eIF-2B subunit family protein		4.96415	1.92418	2.57988		Translation initiation factor eIF-2B subunit family protein	GO:0005575	cellular_component	CC	ND	3.3105e-7	9.3467e-05	AFUA_2G14290	Translation initiation factor eIF-2B subunit family protein	1.2	secondary metabolism	Metabolism	0.0024405	0.078984
AFUA_2G16260	microtubule associated protein (Ase1), putative		3.686	1.42875	2.57988		#N/A	#N/A	#N/A	#N/A	#N/A	#N/A	#N/A	AFUA_2G16260	#N/A	#N/A	#N/A	#N/A	#N/A	#N/A
AFUA_3G01250	short-chain dehydrogenase/reductase family protein, putative		7.68166	2.97752	2.57988		Short-chain dehydrogenase/reductase family protein, putative	GO:0055114	oxidation-reduction process	BP	IEA	7.8355e-8	6.6367e-05	AFUA_3G01250	Short-chain dehydrogenase/reductase family protein, putative	1.2	secondary metabolism	Metabolism	0.0024405	0.078984
AFUA_3G07260	esterase/lipase, putative		9.67417	3.74985	2.57988		Esterase/lipase, putative	GO:0005575	cellular_component	CC	ND	3.3105e-7	9.3467e-05	AFUA_3G07260	Esterase/lipase, putative	1.06	lipid, fatty acid and isoprenoid metabolism	Metabolism	4.5362e-06	0.0010864
AFUA_3G07625	conserved hypothetical protein		13.7599	5.33353	2.57988		Uncharacterized protein	GO:0005575	cellular_component	CC	ND	3.3105e-7	9.3467e-05	AFUA_3G07625	#N/A	#N/A	#N/A	#N/A	#N/A	#N/A
AFUA_3G08070	GMC oxidoreductase, putative		8.99851	3.48796	2.57988		GMC oxidoreductase, putative	GO:0055114	oxidation-reduction process	BP	IEA	7.8355e-8	6.6367e-05	AFUA_3G08070	GMC oxidoreductase, putative	1.05	C-compound and carbohydrate metabolism	Metabolism	2.515e-06	0.0010864
AFUA_3G12110	dynactin Arp1 p25 subunit		13.8948	5.38582	2.57988		#N/A	#N/A	#N/A	#N/A	#N/A	#N/A	#N/A	AFUA_3G12110	#N/A	#N/A	#N/A	#N/A	#N/A	#N/A
AFUA_4G01050	ABC multidrug transporter, putative		2.09965	0.813857	2.57988		ABC multidrug transporter, putative (EC 3.6.3.-)	GO:0008152	metabolic process	BP	IEA	0.0026803	0.41559	AFUA_4G01050	ABC multidrug transporter, putative (EC 3.6.3.-)	32.07	detoxification	Cell rescue, defense and virulence	8.7992e-06	0.0014049
AFUA_4G04370	conserved hypothetical protein		17.997	6.97592	2.57988		Uncharacterized protein	GO:0005575	cellular_component	CC	ND	3.3105e-7	9.3467e-05	AFUA_4G04370	#N/A	#N/A	#N/A	#N/A	#N/A	#N/A
AFUA_4G05985	conserved hypothetical protein		40.4933	15.6958	2.57988		Uncharacterized protein	GO:0005575	cellular_component	CC	ND	3.3105e-7	9.3467e-05	AFUA_4G05985	#N/A	#N/A	#N/A	#N/A	#N/A	#N/A
AFUA_4G06380	sterol carrier protein, putative		6.17545	2.3937	2.57988		Sterol carrier protein, putative	GO:0008152	metabolic process	BP	IEA	0.0026803	0.41559	AFUA_4G06380	Sterol carrier protein, putative	1.06	lipid, fatty acid and isoprenoid metabolism	Metabolism	4.5362e-06	0.0010864
AFUA_4G07960	hypothetical protein		21.3123	8.26095	2.57988		Uncharacterized protein	GO:0005575	cellular_component	CC	ND	3.3105e-7	9.3467e-05	AFUA_4G07960	#N/A	#N/A	#N/A	#N/A	#N/A	#N/A
AFUA_5G02110	conserved hypothetical protein		15.8354	6.13803	2.57988		Uncharacterized protein	GO:0005575	cellular_component	CC	ND	3.3105e-7	9.3467e-05	AFUA_5G02110	#N/A	#N/A	#N/A	#N/A	#N/A	#N/A
AFUA_5G02220	Mst3-like protein kinase, putative		5.46152	2.11697	2.57988		Mst3-like protein kinase, putative (EC 2.7.1.-)	GO:0005575	cellular_component	CC	ND	3.3105e-7	9.3467e-05	AFUA_5G02220	Mst3-like protein kinase, putative (EC 2.7.1.-)	32.01.01	oxidative stress response	Cell rescue, defense and virulence	0.030979	0.41473
AFUA_5G02380	conserved hypothetical protein		6.20248	2.40417	2.57988		Uncharacterized protein	GO:0005575	cellular_component	CC	ND	3.3105e-7	9.3467e-05	AFUA_5G02380	Uncharacterized protein	1.2	secondary metabolism	Metabolism	0.0024405	0.078984
AFUA_5G10160	NmrA-like family protein		9.26317	3.59054	2.57988		NmrA-like family protein	GO:0005575	cellular_component	CC	ND	3.3105e-7	9.3467e-05	AFUA_5G10160	NmrA-like family protein	01.02.07.01	regulation of nitrogen metabolism	Metabolism	0.0024734	0.078984
AFUA_5G11280	conserved hypothetical protein		8.58949	3.32941	2.57988		Uncharacterized protein	GO:0005575	cellular_component	CC	ND	3.3105e-7	9.3467e-05	AFUA_5G11280	#N/A	#N/A	#N/A	#N/A	#N/A	#N/A
AFUA_5G14260	cytochrome b5, putative		20.5401	7.96164	2.57988		#N/A	#N/A	#N/A	#N/A	#N/A	#N/A	#N/A	AFUA_5G14260	Cytochrome b5, putative	1.06	lipid, fatty acid and isoprenoid metabolism	Metabolism	4.5362e-06	0.0010864
AFUA_6G08120	checkpoint protein kinase (SldA), putative		2.30825	0.894712	2.57988		#N/A	#N/A	#N/A	#N/A	#N/A	#N/A	#N/A	AFUA_6G08120	#N/A	#N/A	#N/A	#N/A	#N/A	#N/A
AFUA_6G10250	alkaline serine protease AorO, putative		13.1839	5.11026	2.57988		Tripeptidyl-peptidase sed1 (EC 3.4.14.-) (Sedolisin-A)	GO:0005575	cellular_component	CC	ND	3.3105e-7	9.3467e-05	AFUA_6G10250	Tripeptidyl-peptidase sed1 (EC 3.4.14.-) (Sedolisin-A)	1.06	lipid, fatty acid and isoprenoid metabolism	Metabolism	4.5362e-06	0.0010864
AFUA_6G12020	C2H2 finger domain protein, putative		7.59928	2.94559	2.57988		#N/A	#N/A	#N/A	#N/A	#N/A	#N/A	#N/A	AFUA_6G12020	#N/A	#N/A	#N/A	#N/A	#N/A	#N/A
AFUA_6G12080	nonribosomal peptide synthase, putative		0.716515	0.277732	2.57988		Nonribosomal peptide synthetase 12 (EC 6.3.2.-)	GO:0005575	cellular_component	CC	ND	3.3105e-7	9.3467e-05	AFUA_6G12080	Nonribosomal peptide synthetase 12 (EC 6.3.2.-)	1.2	secondary metabolism	Metabolism	0.0024405	0.078984
AFUA_7G00150	FAD-dependent monooxygenase, putative		6.93039	2.68632	2.57988		FAD-dependent monooxygenase, putative (EC 1.14.-.-)	GO:0055114	oxidation-reduction process	BP	IEA	7.8355e-8	6.6367e-05	AFUA_7G00150	#N/A	#N/A	#N/A	#N/A	#N/A	#N/A
AFUA_7G04350	mandelate racemase/muconate lactonizing enzyme family protein		7.40087	2.86869	2.57988		Mandelate racemase/muconate lactonizing enzyme family protein	GO:0005575	cellular_component	CC	ND	3.3105e-7	9.3467e-05	AFUA_7G04350	#N/A	#N/A	#N/A	#N/A	#N/A	#N/A
AFUA_7G06410	exo-polygalacturonase, putative		5.71478	2.21513	2.57988		Exo-polygalacturonase, putative (EC 3.2.1.-)	GO:0005575	cellular_component	CC	ND	3.3105e-7	9.3467e-05	AFUA_7G06410	Exo-polygalacturonase, putative (EC 3.2.1.-)	1.05	C-compound and carbohydrate metabolism	Metabolism	2.515e-06	0.0010864
AFUA_7G06710	hypothetical protein		16.0143	6.20738	2.57988		Uncharacterized protein	GO:0005575	cellular_component	CC	ND	3.3105e-7	9.3467e-05	AFUA_7G06710	#N/A	#N/A	#N/A	#N/A	#N/A	#N/A
AFUA_8G00700	class III chitinase ChiA2		8.46129	3.27972	2.57988		Class III chitinase ChiA2 (EC 3.2.1.14)	GO:0008152	metabolic process	BP	IEA	0.0026803	0.41559	AFUA_8G00700	Class III chitinase ChiA2 (EC 3.2.1.14)	1.05	C-compound and carbohydrate metabolism	Metabolism	2.515e-06	0.0010864
AFUA_8G01330	hypothetical protein		12.0107	4.65554	2.57988		Uncharacterized protein	GO:0005575	cellular_component	CC	ND	3.3105e-7	9.3467e-05	AFUA_8G01330	#N/A	#N/A	#N/A	#N/A	#N/A	#N/A
AFUA_8G04140	conserved hypothetical protein		11.0008	4.26406	2.57988		Uncharacterized protein	GO:0005575	cellular_component	CC	ND	3.3105e-7	9.3467e-05	AFUA_8G04140	#N/A	#N/A	#N/A	#N/A	#N/A	#N/A
AFUA_8G05790	conserved hypothetical protein		11.4758	4.44821	2.57988		Uncharacterized protein	GO:0005575	cellular_component	CC	ND	3.3105e-7	9.3467e-05	AFUA_8G05790	#N/A	#N/A	#N/A	#N/A	#N/A	#N/A
AFUA_8G05975	phosphotransferase enzyme family protein		12.6825	4.91591	2.57988		Phosphotransferase enzyme family protein	GO:0005575	cellular_component	CC	ND	3.3105e-7	9.3467e-05	AFUA_8G05975	#N/A	#N/A	#N/A	#N/A	#N/A	#N/A
AFUA_8G06700	annexin ANXC3.1		6.09577	2.36281	2.57988		Annexin	GO:0005575	cellular_component	CC	ND	3.3105e-7	9.3467e-05	AFUA_8G06700	Annexin	20.09.16	cellular export and secretion	Cellular transport, transport facilitation and transport routes	0.00089546	0.066362
AFUA_1G04730	endoglucanase, putative		11.86	4.5971	2.57988		Probable xyloglucan-specific endo-beta-1,4-glucanase A (EC 3.2.1.151) (Xyloglucanase A) (Xyloglucanendohydrolase A)	GO:0005575	cellular_component	CC	ND	3.3105e-7	9.3467e-05	AFUA_1G04730	Probable xyloglucan-specific endo-beta-1,4-glucanase A (EC 3.2.1.151) (Xyloglucanase A) (Xyloglucanendohydrolase A)	1.2	secondary metabolism	Metabolism	0.0024405	0.078984
AFUA_2G12000	conserved hypothetical protein		19.6842	7.62991	2.57988		Uncharacterized protein	GO:0005575	cellular_component	CC	ND	3.3105e-7	9.3467e-05	AFUA_2G12000	#N/A	#N/A	#N/A	#N/A	#N/A	#N/A
AFUA_5G12460	2-amino-3-carboxymuconate-6-semialdehyde decarboxylase, putative		6.63825	2.57308	2.57988		2-amino-3-carboxymuconate-6-semialdehyde decarboxylase, putative	GO:0005575	cellular_component	CC	ND	3.3105e-7	9.3467e-05	AFUA_5G12460	2-amino-3-carboxymuconate-6-semialdehyde decarboxylase, putative	1.05	C-compound and carbohydrate metabolism	Metabolism	2.515e-06	0.0010864
AFUA_6G07710	mitochondrial dicarboxylate carrier protein, putative		17.8835	6.9319	2.57988		Mitochondrial dicarboxylate carrier protein, putative	GO:0005575	cellular_component	CC	ND	3.3105e-7	9.3467e-05	AFUA_6G07710	#N/A	#N/A	#N/A	#N/A	#N/A	#N/A
AFUA_7G01740	sugar transporter, putative		5.77298	2.23769	2.57988		#N/A	#N/A	#N/A	#N/A	#N/A	#N/A	#N/A	AFUA_7G01740	Sugar transporter, putative	20.01.01.07	anion transport	Cellular transport, transport facilitation and transport routes	0.047097	0.48136
AFUA_1G04420	conserved hypothetical protein		10.9866	4.25855	2.57988		Uncharacterized protein	GO:0005575	cellular_component	CC	ND	3.3105e-7	9.3467e-05	AFUA_1G04420	#N/A	#N/A	#N/A	#N/A	#N/A	#N/A
AFUA_2G03780	conserved hypothetical protein		11.0293	4.27512	2.57988		Uncharacterized protein	GO:0005575	cellular_component	CC	ND	3.3105e-7	9.3467e-05	AFUA_2G03780	#N/A	#N/A	#N/A	#N/A	#N/A	#N/A
AFUA_2G14620	conserved hypothetical protein		78.737	30.5196	2.57988		Uncharacterized protein	GO:0005575	cellular_component	CC	ND	3.3105e-7	9.3467e-05	AFUA_2G14620	#N/A	#N/A	#N/A	#N/A	#N/A	#N/A
AFUA_3G08960	epoxide hydrolase, putative		28.9978	11.24	2.57988		Epoxide hydrolase, putative	GO:0005575	cellular_component	CC	ND	3.3105e-7	9.3467e-05	AFUA_3G08960	Epoxide hydrolase, putative	1.05	C-compound and carbohydrate metabolism	Metabolism	2.515e-06	0.0010864
AFUA_1G11250	amidohydrolase, putative		6.14866	2.38331	2.57988		Amidohydrolase, putative (EC 3.-.-.-)	GO:0005575	cellular_component	CC	ND	3.3105e-7	9.3467e-05	AFUA_1G11250	Amidohydrolase, putative (EC 3.-.-.-)	1.06	lipid, fatty acid and isoprenoid metabolism	Metabolism	4.5362e-06	0.0010864
AFUA_6G10840	conserved hypothetical protein		107.777	41.7759	2.57988		#N/A	#N/A	#N/A	#N/A	#N/A	#N/A	#N/A	AFUA_6G10840	#N/A	#N/A	#N/A	#N/A	#N/A	#N/A
AFUA_1G16770	amidase family protein, putative		5.60184	2.17136	2.57988		Amidase family protein, putative (EC 3.5.1.-)	GO:0005575	cellular_component	CC	ND	3.3105e-7	9.3467e-05	AFUA_1G16770	#N/A	#N/A	#N/A	#N/A	#N/A	#N/A
AFUA_3G09130	C6 transcription factor, putative		54.6503	21.1833	2.57988		#N/A	#N/A	#N/A	#N/A	#N/A	#N/A	#N/A	AFUA_3G09130	C6 transcription factor, putative	1.2	secondary metabolism	Metabolism	0.0024405	0.078984
AFUA_4G04650	conserved hypothetical protein		26.2457	10.1732	2.57988		Uncharacterized protein	GO:0005575	cellular_component	CC	ND	3.3105e-7	9.3467e-05	AFUA_4G04650	#N/A	#N/A	#N/A	#N/A	#N/A	#N/A
AFUA_8G06920	K+ homeostasis protein Kha1, putative		3.15298	1.22214	2.57988		#N/A	#N/A	#N/A	#N/A	#N/A	#N/A	#N/A	AFUA_8G06920	K+ homeostasis protein Kha1, putative	34.01.01.01	homeostasis of metal ions (Na, K, Ca etc.)	Interaction with the environment	0.0011954	0.067524
AFUA_1G05380	conserved hypothetical protein		96.9992	37.5983	2.57988		Uncharacterized protein	GO:0005575	cellular_component	CC	ND	3.3105e-7	9.3467e-05	AFUA_1G05380	#N/A	#N/A	#N/A	#N/A	#N/A	#N/A
AFUA_1G05745	hypothetical protein		11.6169	4.5029	2.57988		Uncharacterized protein	GO:0005575	cellular_component	CC	ND	3.3105e-7	9.3467e-05	AFUA_1G05745	#N/A	#N/A	#N/A	#N/A	#N/A	#N/A
AFUA_2G00270	#N/A		3.37846	1.30954	2.57988		Uncharacterized protein	GO:0005575	cellular_component	CC	ND	3.3105e-7	9.3467e-05	AFUA_2G00270	#N/A	#N/A	#N/A	#N/A	#N/A	#N/A
AFUA_4G03060	conserved hypothetical protein		4.64677	1.80116	2.57988		Uncharacterized protein	GO:0005575	cellular_component	CC	ND	3.3105e-7	9.3467e-05	AFUA_4G03060	#N/A	#N/A	#N/A	#N/A	#N/A	#N/A
AFUA_5G07510	C6 transcription factor AlcR		3.26936	1.26725	2.57988		#N/A	#N/A	#N/A	#N/A	#N/A	#N/A	#N/A	AFUA_5G07510	#N/A	#N/A	#N/A	#N/A	#N/A	#N/A
AFUA_6G07990	oxidoreductase, 2OG-Fe(II) oxygenase family family		31.4948	12.2079	2.57988		Oxidoreductase, 2OG-Fe(II) oxygenase family family	GO:0055114	oxidation-reduction process	BP	IEA	7.8355e-8	6.6367e-05	AFUA_6G07990	#N/A	#N/A	#N/A	#N/A	#N/A	#N/A
AFUA_6G11590	4-carboxymuconolactone decarboxylase family protein		11.6169	4.5029	2.57988		4-carboxymuconolactone decarboxylase family protein	GO:0055114	oxidation-reduction process	BP	IEA	7.8355e-8	6.6367e-05	AFUA_6G11590	#N/A	#N/A	#N/A	#N/A	#N/A	#N/A
AFUA_8G05520	aldehyde dehydrogenase family protein		5.80847	2.25145	2.57988		Aldehyde dehydrogenase family protein (EC 1.2.3.9)	GO:0055114	oxidation-reduction process	BP	IEA	7.8355e-8	6.6367e-05	AFUA_8G05520	Aldehyde dehydrogenase family protein (EC 1.2.3.9)	1.05	C-compound and carbohydrate metabolism	Metabolism	2.515e-06	0.0010864
AFUA_8G06200	conserved hypothetical protein		16.8722	6.53992	2.57988		Uncharacterized protein	GO:0005575	cellular_component	CC	ND	3.3105e-7	9.3467e-05	AFUA_8G06200	#N/A	#N/A	#N/A	#N/A	#N/A	#N/A
AFUA_2G11520	MFS monosaccharide transporter, putative		776.422	301.606	2.5743		#N/A	#N/A	#N/A	#N/A	#N/A	#N/A	#N/A	AFUA_2G11520	MFS monosaccharide transporter, putative	1.05	C-compound and carbohydrate metabolism	Metabolism	2.515e-06	0.0010864
AFUA_8G05140	oxidoreductin		107.261	42.1874	2.54249		Oxidoreductin	GO:0055114	oxidation-reduction process	BP	IEA	7.8355e-8	6.6367e-05	AFUA_8G05140	#N/A	#N/A	#N/A	#N/A	#N/A	#N/A
AFUA_5G02750	cytochrome c oxidase subunit Va, putative		2543.35	1001.97	2.53836		#N/A	#N/A	#N/A	#N/A	#N/A	#N/A	#N/A	AFUA_5G02750	Cytochrome c oxidase subunit Va, putative	16.21.01	heme binding	Protein with binding function or cofactor requirement (structural or analytic)	0.013841	0.25499
AFUA_2G02630	conserved hypothetical protein		248.865	98.0988	2.53688		#N/A	#N/A	#N/A	#N/A	#N/A	#N/A	#N/A	AFUA_2G02630	#N/A	#N/A	#N/A	#N/A	#N/A	#N/A
AFUA_2G17110	cell division control protein Cdc48		542.709	214.382	2.53151		Cell division control protein Cdc48 (EC 3.6.1.-)	GO:0008152	metabolic process	BP	IEA	0.0026803	0.41559	AFUA_2G17110	Cell division control protein Cdc48 (EC 3.6.1.-)	20.03.25	ABC transporters	Cellular transport, transport facilitation and transport routes	0.026393	0.38309
AFUA_2G04170	conserved hypothetical protein		80.3439	31.7653	2.52929		#N/A	#N/A	#N/A	#N/A	#N/A	#N/A	#N/A	AFUA_2G04170	#N/A	#N/A	#N/A	#N/A	#N/A	#N/A
AFUA_5G07480	conserved hypothetical protein		239.808	94.8123	2.52929		Uncharacterized protein	GO:0005575	cellular_component	CC	ND	3.3105e-7	9.3467e-05	AFUA_5G07480	#N/A	#N/A	#N/A	#N/A	#N/A	#N/A
AFUA_3G13830	PH domain protein		80.257	31.8158	2.52255		#N/A	#N/A	#N/A	#N/A	#N/A	#N/A	#N/A	AFUA_3G13830	PH domain protein	43.01.03.09	development of asco- basidio- or zygospore	Cell type differentiation	0.035951	0.41473
AFUA_1G14610	lipin Smp2, putative		271.365	107.576	2.52255		#N/A	#N/A	#N/A	#N/A	#N/A	#N/A	#N/A	AFUA_1G14610	Lipin Smp2, putative	1.06	lipid, fatty acid and isoprenoid metabolism	Metabolism	4.5362e-06	0.0010864
AFUA_5G12410	conserved hypothetical protein		150.15	59.6197	2.51845		Uncharacterized protein	GO:0005575	cellular_component	CC	ND	3.3105e-7	9.3467e-05	AFUA_5G12410	#N/A	#N/A	#N/A	#N/A	#N/A	#N/A
AFUA_7G04610	Ulp1 protease family protein		141.355	56.233	2.51373		Ulp1 protease family protein	GO:0005575	cellular_component	CC	ND	3.3105e-7	9.3467e-05	AFUA_7G04610	#N/A	#N/A	#N/A	#N/A	#N/A	#N/A
AFUA_2G03810	histone deacetylase HosA		129.722	51.7833	2.5051		#N/A	#N/A	#N/A	#N/A	#N/A	#N/A	#N/A	AFUA_2G03810	Histone deacetylase (EC 3.5.1.98)	43.01.03.09	development of asco- basidio- or zygospore	Cell type differentiation	0.035951	0.41473
AFUA_2G09700	superoxide dismutase copper chaperone Lys7, putative		255.26	101.896	2.5051		Superoxide dismutase copper chaperone Lys7, putative	GO:0055114	oxidation-reduction process	BP	IEA	7.8355e-8	6.6367e-05	AFUA_2G09700	Superoxide dismutase copper chaperone Lys7, putative	32.07	detoxification	Cell rescue, defense and virulence	8.7992e-06	0.0014049
AFUA_5G10920	DUF221 domain protein, putative		104.28	41.6455	2.504		#N/A	#N/A	#N/A	#N/A	#N/A	#N/A	#N/A	AFUA_5G10920	DUF221 domain protein, putative	43.01.03.09	development of asco- basidio- or zygospore	Cell type differentiation	0.035951	0.41473
AFUA_3G05470	conserved hypothetical protein		85.6516	34.2373	2.5017		Uncharacterized protein	GO:0005575	cellular_component	CC	ND	3.3105e-7	9.3467e-05	AFUA_3G05470	#N/A	#N/A	#N/A	#N/A	#N/A	#N/A
AFUA_1G15560	hypothetical protein		80.4122	32.143	2.5017		Uncharacterized protein	GO:0005575	cellular_component	CC	ND	3.3105e-7	9.3467e-05	AFUA_1G15560	#N/A	#N/A	#N/A	#N/A	#N/A	#N/A
AFUA_1G10920	nuclear mRNA splicing factor-associated protein, putative		69.1931	27.7451	2.49388		#N/A	#N/A	#N/A	#N/A	#N/A	#N/A	#N/A	AFUA_1G10920	#N/A	#N/A	#N/A	#N/A	#N/A	#N/A
AFUA_8G05540	conserved hypothetical protein		66.7553	26.8705	2.48433		Uncharacterized protein	GO:0005575	cellular_component	CC	ND	3.3105e-7	9.3467e-05	AFUA_8G05540	#N/A	#N/A	#N/A	#N/A	#N/A	#N/A
AFUA_3G09740	integral plasma membrane protein, putative		78.4019	31.5586	2.48433		#N/A	#N/A	#N/A	#N/A	#N/A	#N/A	#N/A	AFUA_3G09740	#N/A	#N/A	#N/A	#N/A	#N/A	#N/A
AFUA_4G03770	chlorohydrolase family protein		45.158	18.1771	2.48433		#N/A	#N/A	#N/A	#N/A	#N/A	#N/A	#N/A	AFUA_4G03770	Chlorohydrolase family protein (EC 3.5.4.3)	1.02	nitrogen, sulfur and selenium metabolism	Metabolism	0.011195	0.25186
AFUA_2G00180	neutral amino acid permease		583.823	235.094	2.48335		Neutral amino acid permease	GO:0005575	cellular_component	CC	ND	3.3105e-7	9.3467e-05	AFUA_2G00180	Neutral amino acid permease	1.2	secondary metabolism	Metabolism	0.0024405	0.078984
AFUA_1G04620	alcohol dehydrogenase, zinc-containing, putative		311.338	125.926	2.47238		Alcohol dehydrogenase, zinc-containing, putative (EC 1.1.1.-)	GO:0055114	oxidation-reduction process	BP	IEA	7.8355e-8	6.6367e-05	AFUA_1G04620	Alcohol dehydrogenase, zinc-containing, putative (EC 1.1.1.-)	1.05	C-compound and carbohydrate metabolism	Metabolism	2.515e-06	0.0010864
AFUA_2G02910	catechol dioxygenase, putative		75.4563	30.5196	2.47238		Catechol dioxygenase, putative	GO:0055114	oxidation-reduction process	BP	IEA	7.8355e-8	6.6367e-05	AFUA_2G02910	Catechol dioxygenase, putative	1.2	secondary metabolism	Metabolism	0.0024405	0.078984
AFUA_7G02110	Ran-binding protein (RanBP10), putative		120.474	48.7964	2.46892		Ran-binding protein (RanBP10), putative	GO:0005575	cellular_component	CC	ND	3.3105e-7	9.3467e-05	AFUA_7G02110	Ran-binding protein (RanBP10), putative	14.13.04.02	vacuolar protein degradation	Protein fate (folding, modification, destination)	0.00096981	0.066362
AFUA_5G10490	amidase, putative		66.3861	26.9291	2.46522		Amidase, putative (EC 3.5.1.-)	GO:0005575	cellular_component	CC	ND	3.3105e-7	9.3467e-05	AFUA_5G10490	#N/A	#N/A	#N/A	#N/A	#N/A	#N/A
AFUA_5G09330	CipC-like antibiotic response protein, putative		2481.12	1006.45	2.46522		#N/A	#N/A	#N/A	#N/A	#N/A	#N/A	#N/A	AFUA_5G09330	#N/A	#N/A	#N/A	#N/A	#N/A	#N/A
AFUA_8G06220	conserved hypothetical protein		43.4063	17.6075	2.46522		Uncharacterized protein	GO:0005575	cellular_component	CC	ND	3.3105e-7	9.3467e-05	AFUA_8G06220	#N/A	#N/A	#N/A	#N/A	#N/A	#N/A
AFUA_2G06040	actin cortical patch component, putative		102.985	41.8193	2.46261		#N/A	#N/A	#N/A	#N/A	#N/A	#N/A	#N/A	AFUA_2G06040	Actin cortical patch component, putative	40.10.02.04	regulation of apoptosis	Cell fate	0.034876	0.41473
AFUA_2G00660	sensor histidine kinase/response regulator TcsB/Sln1, putative		105.94	43.0669	2.45989		#N/A	#N/A	#N/A	#N/A	#N/A	#N/A	#N/A	AFUA_2G00660	#N/A	#N/A	#N/A	#N/A	#N/A	#N/A
AFUA_5G12870	NAD+ kinase, putative		87.0824	35.4422	2.45703		NAD+ kinase, putative (EC 2.7.1.-)	GO:0008152	metabolic process	BP	IEA	0.0026803	0.41559	AFUA_5G12870	NAD+ kinase, putative (EC 2.7.1.-)	34.01.01.01	homeostasis of metal ions (Na, K, Ca etc.)	Interaction with the environment	0.0011954	0.067524
AFUA_6G04840	hypercellular protein HypA		13.2703	5.40095	2.45703		#N/A	#N/A	#N/A	#N/A	#N/A	#N/A	#N/A	AFUA_6G04840	#N/A	#N/A	#N/A	#N/A	#N/A	#N/A
AFUA_1G13960	DUF292 domian protein		56.7474	23.0959	2.45703		#N/A	#N/A	#N/A	#N/A	#N/A	#N/A	#N/A	AFUA_1G13960	#N/A	#N/A	#N/A	#N/A	#N/A	#N/A
AFUA_5G01662	#N/A		56.7474	23.0959	2.45703		#N/A	#N/A	#N/A	#N/A	#N/A	#N/A	#N/A	AFUA_5G01662	Pathway-specific regulatory protein	01.02.07.01	regulation of nitrogen metabolism	Metabolism	0.0024734	0.078984
AFUA_4G08130	mitochondrial hypoxia responsive domain protein		103.829	42.258	2.45703		#N/A	#N/A	#N/A	#N/A	#N/A	#N/A	#N/A	AFUA_4G08130	#N/A	#N/A	#N/A	#N/A	#N/A	#N/A
AFUA_5G12740	MFS multidrug transporter, putative		39.4507	16.0563	2.45703		#N/A	#N/A	#N/A	#N/A	#N/A	#N/A	#N/A	AFUA_5G12740	MFS multidrug transporter, putative	1.2	secondary metabolism	Metabolism	0.0024405	0.078984
AFUA_3G02940	allergen, putative		8870.84	3615.37	2.45365		Allergen, putative	GO:0005575	cellular_component	CC	ND	3.3105e-7	9.3467e-05	AFUA_3G02940	#N/A	#N/A	#N/A	#N/A	#N/A	#N/A
AFUA_1G01410	hypothetical protein		31.189	12.8005	2.43655		Uncharacterized protein	GO:0005575	cellular_component	CC	ND	3.3105e-7	9.3467e-05	AFUA_1G01410	#N/A	#N/A	#N/A	#N/A	#N/A	#N/A
AFUA_5G10250	conserved hypothetical protein		76.1249	31.2428	2.43655		Uncharacterized protein	GO:0005575	cellular_component	CC	ND	3.3105e-7	9.3467e-05	AFUA_5G10250	#N/A	#N/A	#N/A	#N/A	#N/A	#N/A
AFUA_5G06660	UPF0187 domain membrane protein		32.647	13.3989	2.43655		#N/A	#N/A	#N/A	#N/A	#N/A	#N/A	#N/A	AFUA_5G06660	#N/A	#N/A	#N/A	#N/A	#N/A	#N/A
AFUA_6G13440	choline sulfatase, putative		27.2243	11.1733	2.43655		Choline sulfatase, putative (EC 3.1.6.6)	GO:0005575	cellular_component	CC	ND	3.3105e-7	9.3467e-05	AFUA_6G13440	Choline sulfatase, putative (EC 3.1.6.6)	1.05	C-compound and carbohydrate metabolism	Metabolism	2.515e-06	0.0010864
AFUA_4G11680	conserved hypothetical protein		53.1866	21.8286	2.43655		Uncharacterized protein	GO:0005575	cellular_component	CC	ND	3.3105e-7	9.3467e-05	AFUA_4G11680	#N/A	#N/A	#N/A	#N/A	#N/A	#N/A
AFUA_6G09390	hypothetical protein		66.9264	27.4677	2.43655		#N/A	#N/A	#N/A	#N/A	#N/A	#N/A	#N/A	AFUA_6G09390	#N/A	#N/A	#N/A	#N/A	#N/A	#N/A
AFUA_2G13320	mitochondrial membrane fission protein (Fis1), putative		211.347	86.74	2.43655		#N/A	#N/A	#N/A	#N/A	#N/A	#N/A	#N/A	AFUA_2G13320	#N/A	#N/A	#N/A	#N/A	#N/A	#N/A
AFUA_6G05350	aspartic-type endopeptidase (OpsB), putative		225.518	92.6892	2.43306		#N/A	#N/A	#N/A	#N/A	#N/A	#N/A	#N/A	AFUA_6G05350	#N/A	#N/A	#N/A	#N/A	#N/A	#N/A
AFUA_2G04290	cytochrome P450 monooxygenase, putative		53.7434	22.1757	2.42352		Cytochrome P450 monooxygenase, putative (EC 1.14.-.-)	GO:0055114	oxidation-reduction process	BP	IEA	7.8355e-8	6.6367e-05	AFUA_2G04290	Cytochrome P450 monooxygenase, putative (EC 1.14.-.-)	1.06	lipid, fatty acid and isoprenoid metabolism	Metabolism	4.5362e-06	0.0010864
AFUA_2G05450	NADH-ubiquinone oxidoreductase 64 kDa subunit, putative		291.77	120.493	2.42147		NADH-ubiquinone oxidoreductase 64 kDa subunit, putative (EC 1.6.99.3)	GO:0055114	oxidation-reduction process	BP	IEA	7.8355e-8	6.6367e-05	AFUA_2G05450	NADH-ubiquinone oxidoreductase 64 kDa subunit, putative (EC 1.6.99.3)	02.16.01	alcohol fermentation	Energy	0.0023361	0.078984
AFUA_1G09890	conserved hypothetical protein		2327.54	964.718	2.41267		Uncharacterized protein	GO:0005575	cellular_component	CC	ND	3.3105e-7	9.3467e-05	AFUA_1G09890	#N/A	#N/A	#N/A	#N/A	#N/A	#N/A
AFUA_2G10750	RNA helicase (Dbp), putative		809.628	335.824	2.41087		#N/A	#N/A	#N/A	#N/A	#N/A	#N/A	#N/A	AFUA_2G10750	#N/A	#N/A	#N/A	#N/A	#N/A	#N/A
AFUA_5G08750	conserved hypothetical protein		20.1337	8.36154	2.40789		Uncharacterized protein	GO:0005575	cellular_component	CC	ND	3.3105e-7	9.3467e-05	AFUA_5G08750	#N/A	#N/A	#N/A	#N/A	#N/A	#N/A
AFUA_5G10545	#N/A		1514.64	629.031	2.40789		#N/A	#N/A	#N/A	#N/A	#N/A	#N/A	#N/A	AFUA_5G10545	#N/A	#N/A	#N/A	#N/A	#N/A	#N/A
AFUA_1G06470	neutral/alkaline nonlysosomal ceramidase, putative		34.5825	14.3622	2.40789		Neutral/alkaline nonlysosomal ceramidase, putative (EC 3.5.1.23)	GO:0008152	metabolic process	BP	IEA	0.0026803	0.41559	AFUA_1G06470	Neutral/alkaline nonlysosomal ceramidase, putative (EC 3.5.1.23)	1.06	lipid, fatty acid and isoprenoid metabolism	Metabolism	4.5362e-06	0.0010864
AFUA_2G03410	conserved hypothetical protein		47.2422	19.6198	2.40789		Uncharacterized protein	GO:0005575	cellular_component	CC	ND	3.3105e-7	9.3467e-05	AFUA_2G03410	#N/A	#N/A	#N/A	#N/A	#N/A	#N/A
AFUA_3G03410	enoyl-CoA hydratase/isomerase family protein		48.8111	20.2713	2.40789		Enoyl-CoA hydratase/isomerase family protein (EC 4.2.1.-)	GO:0008152	metabolic process	BP	IEA	0.0026803	0.41559	AFUA_3G03410	Enoyl-CoA hydratase/isomerase family protein (EC 4.2.1.-)	1.05	C-compound and carbohydrate metabolism	Metabolism	2.515e-06	0.0010864
AFUA_1G13080	BRCT domain protein		35.8477	14.8876	2.40789		BRCT domain protein	GO:0005575	cellular_component	CC	ND	3.3105e-7	9.3467e-05	AFUA_1G13080	#N/A	#N/A	#N/A	#N/A	#N/A	#N/A
AFUA_3G03900	C6 transcription factor, putative		45.5346	18.9106	2.40789		#N/A	#N/A	#N/A	#N/A	#N/A	#N/A	#N/A	AFUA_3G03900	#N/A	#N/A	#N/A	#N/A	#N/A	#N/A
AFUA_7G05480	sister chromatid cohesion factor (Chl12), putative		28.1144	11.6759	2.40789		#N/A	#N/A	#N/A	#N/A	#N/A	#N/A	#N/A	AFUA_7G05480	#N/A	#N/A	#N/A	#N/A	#N/A	#N/A
AFUA_8G05930	conserved hypothetical protein		59.8544	24.8576	2.40789		Uncharacterized protein	GO:0005575	cellular_component	CC	ND	3.3105e-7	9.3467e-05	AFUA_8G05930	#N/A	#N/A	#N/A	#N/A	#N/A	#N/A
AFUA_4G14400	C2H2 finger domain protein, putative		285.522	118.692	2.40556		C2H2 finger domain protein, putative	GO:0005575	cellular_component	CC	ND	3.3105e-7	9.3467e-05	AFUA_4G14400	#N/A	#N/A	#N/A	#N/A	#N/A	#N/A
AFUA_5G11320	thioredoxin TrxA		3736.81	1554.03	2.4046		Thioredoxin	GO:0055114	oxidation-reduction process	BP	IEA	7.8355e-8	6.6367e-05	AFUA_5G11320	Thioredoxin	32.07	detoxification	Cell rescue, defense and virulence	8.7992e-06	0.0014049
AFUA_8G04130	C6 transcription factor (Ctf1B), putative		56.52	23.5614	2.39884		#N/A	#N/A	#N/A	#N/A	#N/A	#N/A	#N/A	AFUA_8G04130	C6 transcription factor (Ctf1B), putative	1.2	secondary metabolism	Metabolism	0.0024405	0.078984
AFUA_3G10770	RTA1 domain protein, putative		122.83	51.273	2.3956		#N/A	#N/A	#N/A	#N/A	#N/A	#N/A	#N/A	AFUA_3G10770	RTA1 domain protein, putative	32.07	detoxification	Cell rescue, defense and virulence	8.7992e-06	0.0014049
AFUA_1G03050	DEAD box helicase Mph1, putative		42.8695	17.9462	2.38878		ATP-dependent DNA helicase mph1 (EC 3.6.4.12)	GO:0005575	cellular_component	CC	ND	3.3105e-7	9.3467e-05	AFUA_1G03050	ATP-dependent DNA helicase mph1 (EC 3.6.4.12)	32.07	detoxification	Cell rescue, defense and virulence	8.7992e-06	0.0014049
AFUA_3G06340	COX1 assembly protein Shy1, putative		117.291	49.2524	2.38143		#N/A	#N/A	#N/A	#N/A	#N/A	#N/A	#N/A	AFUA_3G06340	#N/A	#N/A	#N/A	#N/A	#N/A	#N/A
AFUA_2G15010	serine threonine protein kinase, putative		16.5199	6.93695	2.38143		#N/A	#N/A	#N/A	#N/A	#N/A	#N/A	#N/A	AFUA_2G15010	#N/A	#N/A	#N/A	#N/A	#N/A	#N/A
AFUA_5G03750	WW domain protein		133.915	56.233	2.38143		#N/A	#N/A	#N/A	#N/A	#N/A	#N/A	#N/A	AFUA_5G03750	#N/A	#N/A	#N/A	#N/A	#N/A	#N/A
AFUA_1G12620	MFS toxin efflux pump (AflT), putative		302.966	127.386	2.37833		#N/A	#N/A	#N/A	#N/A	#N/A	#N/A	#N/A	AFUA_1G12620	MFS toxin efflux pump (AflT), putative	20.09.16	cellular export and secretion	Cellular transport, transport facilitation and transport routes	0.00089546	0.066362
AFUA_5G09220	Beige/BEACH domain protein		17.5733	7.39138	2.37754		#N/A	#N/A	#N/A	#N/A	#N/A	#N/A	#N/A	AFUA_5G09220	Beige/BEACH domain protein	20.09.16	cellular export and secretion	Cellular transport, transport facilitation and transport routes	0.00089546	0.066362
AFUA_7G01840	membrane bound C2 domain protein (vp115), putative		157.781	66.3936	2.37645		#N/A	#N/A	#N/A	#N/A	#N/A	#N/A	#N/A	AFUA_7G01840	#N/A	#N/A	#N/A	#N/A	#N/A	#N/A
AFUA_3G08010	C2H2 transcription factor (Ace1), putative		495.272	208.866	2.37125		#N/A	#N/A	#N/A	#N/A	#N/A	#N/A	#N/A	AFUA_3G08010	#N/A	#N/A	#N/A	#N/A	#N/A	#N/A
AFUA_5G03530	class III chitinase, putative		56.1799	23.7558	2.36489		Class III chitinase, putative (EC 3.2.1.14)	GO:0005575	cellular_component	CC	ND	3.3105e-7	9.3467e-05	AFUA_5G03530	Class III chitinase, putative (EC 3.2.1.14)	1.05	C-compound and carbohydrate metabolism	Metabolism	2.515e-06	0.0010864
AFUA_4G09990	Nucleoside transporter family		23.2512	9.83183	2.36489		#N/A	#N/A	#N/A	#N/A	#N/A	#N/A	#N/A	AFUA_4G09990	#N/A	#N/A	#N/A	#N/A	#N/A	#N/A
AFUA_4G07890	conserved hypothetical protein		28.4747	12.0406	2.36489		Uncharacterized protein	GO:0005575	cellular_component	CC	ND	3.3105e-7	9.3467e-05	AFUA_4G07890	#N/A	#N/A	#N/A	#N/A	#N/A	#N/A
AFUA_3G12250	protein-tyrosine phosphatase, putative		16.9272	7.1577	2.36489		#N/A	#N/A	#N/A	#N/A	#N/A	#N/A	#N/A	AFUA_3G12250	#N/A	#N/A	#N/A	#N/A	#N/A	#N/A
AFUA_5G09170	C2H2 finger domain protein, putative		25.0441	10.5899	2.36489		#N/A	#N/A	#N/A	#N/A	#N/A	#N/A	#N/A	AFUA_5G09170	#N/A	#N/A	#N/A	#N/A	#N/A	#N/A
AFUA_4G03440	conserved hypothetical protein		27.5684	11.6574	2.36489		Uncharacterized protein	GO:0005575	cellular_component	CC	ND	3.3105e-7	9.3467e-05	AFUA_4G03440	#N/A	#N/A	#N/A	#N/A	#N/A	#N/A
AFUA_4G13040	clathrin-coated vesicle protein, putative		54.1317	22.8897	2.36489		#N/A	#N/A	#N/A	#N/A	#N/A	#N/A	#N/A	AFUA_4G13040	#N/A	#N/A	#N/A	#N/A	#N/A	#N/A
AFUA_6G03930	conserved hypothetical protein		28.7107	12.1404	2.36489		Uncharacterized protein	GO:0055114	oxidation-reduction process	BP	IEA	7.8355e-8	6.6367e-05	AFUA_6G03930	Uncharacterized protein	1.2	secondary metabolism	Metabolism	0.0024405	0.078984
AFUA_1G08880	iron/copper transporter Atx1, putative		389.748	164.806	2.36489		#N/A	#N/A	#N/A	#N/A	#N/A	#N/A	#N/A	AFUA_1G08880	Iron/copper transporter Atx1, putative	32.07	detoxification	Cell rescue, defense and virulence	8.7992e-06	0.0014049
AFUA_4G10070	class I alpha-mannosidase		16.1889	6.84552	2.36489		Class I alpha-mannosidase (EC 3.2.1.113)	GO:0008152	metabolic process	BP	IEA	0.0026803	0.41559	AFUA_4G10070	Class I alpha-mannosidase (EC 3.2.1.113)	1.05	C-compound and carbohydrate metabolism	Metabolism	2.515e-06	0.0010864
AFUA_2G16470	ubiquitin conjugating enzyme (UbcF), putative		33.2054	14.041	2.36489		Ubiquitin conjugating enzyme (UbcF), putative (EC 6.3.2.19)	GO:0005575	cellular_component	CC	ND	3.3105e-7	9.3467e-05	AFUA_2G16470	#N/A	#N/A	#N/A	#N/A	#N/A	#N/A
AFUA_5G14010	HIT finger domain protein, putative		25.1653	10.6412	2.36489		#N/A	#N/A	#N/A	#N/A	#N/A	#N/A	#N/A	AFUA_5G14010	#N/A	#N/A	#N/A	#N/A	#N/A	#N/A
AFUA_8G02740	conserved hypothetical protein		30.9324	13.0798	2.36489		Uncharacterized protein	GO:0005575	cellular_component	CC	ND	3.3105e-7	9.3467e-05	AFUA_8G02740	#N/A	#N/A	#N/A	#N/A	#N/A	#N/A
AFUA_3G10560	C6 finger domain protein, putative		85.8949	36.3209	2.36489		#N/A	#N/A	#N/A	#N/A	#N/A	#N/A	#N/A	AFUA_3G10560	#N/A	#N/A	#N/A	#N/A	#N/A	#N/A
AFUA_3G11960	forkhead transcription factor Fkh1/2, putative		28.7504	12.1572	2.36489		#N/A	#N/A	#N/A	#N/A	#N/A	#N/A	#N/A	AFUA_3G11960	#N/A	#N/A	#N/A	#N/A	#N/A	#N/A
AFUA_7G00720	conserved hypothetical protein		54.5579	23.07	2.36489		Uncharacterized protein	GO:0005575	cellular_component	CC	ND	3.3105e-7	9.3467e-05	AFUA_7G00720	#N/A	#N/A	#N/A	#N/A	#N/A	#N/A
AFUA_2G15800	conserved hypothetical protein		349.395	148.783	2.34835		#N/A	#N/A	#N/A	#N/A	#N/A	#N/A	#N/A	AFUA_2G15800	#N/A	#N/A	#N/A	#N/A	#N/A	#N/A
AFUA_5G05850	conserved hypothetical protein		160.177	68.3745	2.34265		Uncharacterized protein	GO:0005575	cellular_component	CC	ND	3.3105e-7	9.3467e-05	AFUA_5G05850	#N/A	#N/A	#N/A	#N/A	#N/A	#N/A
AFUA_2G03090	vacuolar ABC heavy metal transporter (Hmt1), putative		85.4035	36.4559	2.34265		#N/A	#N/A	#N/A	#N/A	#N/A	#N/A	#N/A	AFUA_2G03090	Vacuolar ABC heavy metal transporter (Hmt1), putative	34.01.01.01	homeostasis of metal ions (Na, K, Ca etc.)	Interaction with the environment	0.0011954	0.067524
AFUA_4G11350	prenyltransferase, putative		203.469	87.0263	2.33802		Prenyltransferase, putative (EC 2.5.1.31)	GO:0005575	cellular_component	CC	ND	3.3105e-7	9.3467e-05	AFUA_4G11350	#N/A	#N/A	#N/A	#N/A	#N/A	#N/A
AFUA_1G09610	conserved hypothetical protein		101.281	43.3904	2.33418		Uncharacterized protein	GO:0005575	cellular_component	CC	ND	3.3105e-7	9.3467e-05	AFUA_1G09610	#N/A	#N/A	#N/A	#N/A	#N/A	#N/A
AFUA_7G05880	conserved hypothetical protein		51.4385	22.0371	2.33418		Uncharacterized protein	GO:0005575	cellular_component	CC	ND	3.3105e-7	9.3467e-05	AFUA_7G05880	#N/A	#N/A	#N/A	#N/A	#N/A	#N/A
AFUA_6G08270	hypothetical protein		424.064	181.676	2.33418		Uncharacterized protein	GO:0005575	cellular_component	CC	ND	3.3105e-7	9.3467e-05	AFUA_6G08270	#N/A	#N/A	#N/A	#N/A	#N/A	#N/A
AFUA_3G13010	Zn-dependent hydrolase/oxidoreductase family protein, putative		44.0001	18.8504	2.33418		Zn-dependent hydrolase/oxidoreductase family protein, putative	GO:0005575	cellular_component	CC	ND	3.3105e-7	9.3467e-05	AFUA_3G13010	#N/A	#N/A	#N/A	#N/A	#N/A	#N/A
AFUA_8G00460	methionine aminopeptidase, type I, putative		154.309	66.2537	2.32906		Methionine aminopeptidase 1 (MAP 1) (MetAP 1) (EC 3.4.11.18) (Peptidase M 1)	GO:0005575	cellular_component	CC	ND	3.3105e-7	9.3467e-05	AFUA_8G00460	#N/A	#N/A	#N/A	#N/A	#N/A	#N/A
AFUA_2G05470	sister chromatid cohesion protein Mis4, putative		24.5137	10.5347	2.32695		#N/A	#N/A	#N/A	#N/A	#N/A	#N/A	#N/A	AFUA_2G05470	#N/A	#N/A	#N/A	#N/A	#N/A	#N/A
AFUA_3G07230	phosphopantothenate-cysteine ligase, putative		229.889	98.9103	2.32422		Phosphopantothenate-cysteine ligase, putative	GO:0008152	metabolic process	BP	IEA	0.0026803	0.41559	AFUA_3G07230	#N/A	#N/A	#N/A	#N/A	#N/A	#N/A
AFUA_4G10360	RING and UBP finger domain protein, putative		36.2369	15.6066	2.32189		#N/A	#N/A	#N/A	#N/A	#N/A	#N/A	#N/A	AFUA_4G10360	#N/A	#N/A	#N/A	#N/A	#N/A	#N/A
AFUA_5G09910	nitroreductase family protein, putative		914.505	398.155	2.29686		Nitroreductase family protein, putative	GO:0055114	oxidation-reduction process	BP	IEA	7.8355e-8	6.6367e-05	AFUA_5G09910	#N/A	#N/A	#N/A	#N/A	#N/A	#N/A
AFUA_8G02280	C6 transcription factor, putative		9.91962	4.32562	2.29323		#N/A	#N/A	#N/A	#N/A	#N/A	#N/A	#N/A	AFUA_8G02280	C6 transcription factor, putative	01.01.03.05	metabolism of arginine	Metabolism	0.036365	0.41473
AFUA_1G06640	zinc-binding oxidoreductase, putative		19.8392	8.65123	2.29323		Zinc-binding oxidoreductase, putative (EC 1.-.-.-)	GO:0055114	oxidation-reduction process	BP	IEA	7.8355e-8	6.6367e-05	AFUA_1G06640	#N/A	#N/A	#N/A	#N/A	#N/A	#N/A
AFUA_5G02660	pyoverdine/dityrosine biosynthesis protein, putative		9.91962	4.32562	2.29323		Pyoverdine/dityrosine biosynthesis protein, putative	GO:0055114	oxidation-reduction process	BP	IEA	7.8355e-8	6.6367e-05	AFUA_5G02660	Pyoverdine/dityrosine biosynthesis protein, putative	1.2	secondary metabolism	Metabolism	0.0024405	0.078984
AFUA_5G12720	ABC multidrug transporter, putative		5.27846	2.30176	2.29323		ABC multidrug transporter, putative	GO:0005575	cellular_component	CC	ND	3.3105e-7	9.3467e-05	AFUA_5G12720	ABC multidrug transporter, putative	1.2	secondary metabolism	Metabolism	0.0024405	0.078984
AFUA_2G07840	competence/damage-inducible protein CinA, putative		43.4411	18.9432	2.29323		Competence/damage-inducible protein CinA, putative	GO:0005575	cellular_component	CC	ND	3.3105e-7	9.3467e-05	AFUA_2G07840	#N/A	#N/A	#N/A	#N/A	#N/A	#N/A
AFUA_8G01300	conserved hypothetical protein		36.1663	15.7709	2.29323		Uncharacterized protein	GO:0005575	cellular_component	CC	ND	3.3105e-7	9.3467e-05	AFUA_8G01300	#N/A	#N/A	#N/A	#N/A	#N/A	#N/A
AFUA_3G09210	endonuclease/exonuclease/phosphatase family protein		12.4526	5.43018	2.29323		#N/A	#N/A	#N/A	#N/A	#N/A	#N/A	#N/A	AFUA_3G09210	#N/A	#N/A	#N/A	#N/A	#N/A	#N/A
AFUA_6G11870	hypothetical protein		99.1962	43.2562	2.29323		Uncharacterized protein	GO:0005575	cellular_component	CC	ND	3.3105e-7	9.3467e-05	AFUA_6G11870	#N/A	#N/A	#N/A	#N/A	#N/A	#N/A
AFUA_6G07320	MFS multidrug transporter, putative		29.2975	12.7757	2.29323		#N/A	#N/A	#N/A	#N/A	#N/A	#N/A	#N/A	AFUA_6G07320	MFS multidrug transporter, putative	20.09.16	cellular export and secretion	Cellular transport, transport facilitation and transport routes	0.00089546	0.066362
AFUA_1G16540	WD40 domain protein		15.7474	6.86692	2.29323		#N/A	#N/A	#N/A	#N/A	#N/A	#N/A	#N/A	AFUA_1G16540	#N/A	#N/A	#N/A	#N/A	#N/A	#N/A
AFUA_6G12910	dsDNA-dependent ATPase Rad54, putative		9.35489	4.07936	2.29323		DsDNA-dependent ATPase Rad54, putative	GO:0008152	metabolic process	BP	IEA	0.0026803	0.41559	AFUA_6G12910	#N/A	#N/A	#N/A	#N/A	#N/A	#N/A
AFUA_4G10570	cell cycle regulatory protein, putative		8.60906	3.75412	2.29323		#N/A	#N/A	#N/A	#N/A	#N/A	#N/A	#N/A	AFUA_4G10570	Cell cycle regulatory protein, putative	43.01.03.09	development of asco- basidio- or zygospore	Cell type differentiation	0.035951	0.41473
AFUA_1G02540	EF hand domain protein		36.0226	15.7083	2.29323		EF hand domain protein	GO:0005575	cellular_component	CC	ND	3.3105e-7	9.3467e-05	AFUA_1G02540	#N/A	#N/A	#N/A	#N/A	#N/A	#N/A
AFUA_3G07750	acetyltransferase, GNAT family family		19.6331	8.56135	2.29323		Acetyltransferase, GNAT family family	GO:0005575	cellular_component	CC	ND	3.3105e-7	9.3467e-05	AFUA_3G07750	#N/A	#N/A	#N/A	#N/A	#N/A	#N/A
AFUA_4G11740	conserved hypothetical protein		32.8641	14.331	2.29323		Uncharacterized protein	GO:0005575	cellular_component	CC	ND	3.3105e-7	9.3467e-05	AFUA_4G11740	#N/A	#N/A	#N/A	#N/A	#N/A	#N/A
AFUA_3G00865	conserved hypothetical protein		41.5316	18.1106	2.29323		Uncharacterized protein	GO:0055114	oxidation-reduction process	BP	IEA	7.8355e-8	6.6367e-05	AFUA_3G00865	#N/A	#N/A	#N/A	#N/A	#N/A	#N/A
AFUA_4G07070	conserved hypothetical protein		44.9926	19.6198	2.29323		Uncharacterized protein	GO:0005575	cellular_component	CC	ND	3.3105e-7	9.3467e-05	AFUA_4G07070	#N/A	#N/A	#N/A	#N/A	#N/A	#N/A
AFUA_2G01110	conserved hypothetical protein		15.3633	6.69943	2.29323		Uncharacterized protein	GO:0005575	cellular_component	CC	ND	3.3105e-7	9.3467e-05	AFUA_2G01110	#N/A	#N/A	#N/A	#N/A	#N/A	#N/A
AFUA_7G00760	phosphoglycolate phosphatase, putative		32.5808	14.2074	2.29323		Phosphoglycolate phosphatase, putative (EC 3.1.3.18)	GO:0005575	cellular_component	CC	ND	3.3105e-7	9.3467e-05	AFUA_7G00760	#N/A	#N/A	#N/A	#N/A	#N/A	#N/A
AFUA_3G05440	DNA repair protein Rad18, putative		20.9384	9.13053	2.29323		#N/A	#N/A	#N/A	#N/A	#N/A	#N/A	#N/A	AFUA_3G05440	#N/A	#N/A	#N/A	#N/A	#N/A	#N/A
AFUA_6G12430	Ran-interacting protein Mog1, putative		165.038	71.9677	2.29323		Ran-interacting protein Mog1, putative	GO:0005575	cellular_component	CC	ND	3.3105e-7	9.3467e-05	AFUA_6G12430	#N/A	#N/A	#N/A	#N/A	#N/A	#N/A
AFUA_5G07190	beta-glucosidase		9.00924	3.92863	2.29323		Probable beta-glucosidase I (EC 3.2.1.21) (Beta-D-glucoside glucohydrolase I) (Cellobiase I) (Gentiobiase I)	GO:0005575	cellular_component	CC	ND	3.3105e-7	9.3467e-05	AFUA_5G07190	Probable beta-glucosidase I (EC 3.2.1.21) (Beta-D-glucoside glucohydrolase I) (Cellobiase I) (Gentiobiase I)	01.05.03	polysaccharide metabolism	Metabolism	0.012778	0.25186
AFUA_3G08100	checkpoint protein kinase, putative		8.97714	3.91463	2.29323		Checkpoint protein kinase, putative	GO:0005575	cellular_component	CC	ND	3.3105e-7	9.3467e-05	AFUA_3G08100	#N/A	#N/A	#N/A	#N/A	#N/A	#N/A
AFUA_3G09690	extracellular thaumatin domain protein, putative		42.4649	18.5175	2.29323		#N/A	#N/A	#N/A	#N/A	#N/A	#N/A	#N/A	AFUA_3G09690	#N/A	#N/A	#N/A	#N/A	#N/A	#N/A
AFUA_7G04870	glutamine-serine-proline rich protein, putative		44.7263	19.5037	2.29323		#N/A	#N/A	#N/A	#N/A	#N/A	#N/A	#N/A	AFUA_7G04870	#N/A	#N/A	#N/A	#N/A	#N/A	#N/A
AFUA_1G12820	gamma-tubulin complex component GCP6, putative		7.97337	3.47692	2.29323		#N/A	#N/A	#N/A	#N/A	#N/A	#N/A	#N/A	AFUA_1G12820	#N/A	#N/A	#N/A	#N/A	#N/A	#N/A
AFUA_2G15950	extracellular aspartic endopeptidase, putative		17.6195	7.68326	2.29323		Putative aspergillopepsin A-like aspartic endopeptidase AFUA_2G15950 (EC 3.4.23.-)	GO:0005575	cellular_component	CC	ND	3.3105e-7	9.3467e-05	AFUA_2G15950	#N/A	#N/A	#N/A	#N/A	#N/A	#N/A
AFUA_2G16940	conserved hypothetical protein		29.5264	12.8755	2.29323		Uncharacterized protein	GO:0005575	cellular_component	CC	ND	3.3105e-7	9.3467e-05	AFUA_2G16940	Uncharacterized protein	20.01.13	lipid/fatty acid transport	Cellular transport, transport facilitation and transport routes	0.048237	0.48136
AFUA_3G08550	short-chain dehydrogenase/reductase family protein, putative		46.8034	20.4094	2.29323		Short-chain dehydrogenase/reductase family protein, putative	GO:0055114	oxidation-reduction process	BP	IEA	7.8355e-8	6.6367e-05	AFUA_3G08550	Short-chain dehydrogenase/reductase family protein, putative	1.05	C-compound and carbohydrate metabolism	Metabolism	2.515e-06	0.0010864
AFUA_6G10860	conserved hypothetical protein		24.6213	10.7365	2.29323		Uncharacterized protein	GO:0005575	cellular_component	CC	ND	3.3105e-7	9.3467e-05	AFUA_6G10860	#N/A	#N/A	#N/A	#N/A	#N/A	#N/A
AFUA_7G00800	acid phosphatase, putative		15.1478	6.60545	2.29323		Acid phosphatase, putative (EC 3.1.3.2)	GO:0005575	cellular_component	CC	ND	3.3105e-7	9.3467e-05	AFUA_7G00800	#N/A	#N/A	#N/A	#N/A	#N/A	#N/A
AFUA_6G09410	conserved hypothetical protein		22.1664	9.66604	2.29323		Uncharacterized protein	GO:0005575	cellular_component	CC	ND	3.3105e-7	9.3467e-05	AFUA_6G09410	#N/A	#N/A	#N/A	#N/A	#N/A	#N/A
AFUA_5G09340	Phospholipase/Carboxylesterase superfamily		414.033	181.06	2.28671		Phospholipase/Carboxylesterase superfamily	GO:0008152	metabolic process	BP	IEA	0.0026803	0.41559	AFUA_5G09340	#N/A	#N/A	#N/A	#N/A	#N/A	#N/A
AFUA_3G11610	nucleosome binding protein (Nhp6a), putative		980.838	429.019	2.28624		#N/A	#N/A	#N/A	#N/A	#N/A	#N/A	#N/A	AFUA_3G11610	#N/A	#N/A	#N/A	#N/A	#N/A	#N/A
AFUA_4G06530	bZIP transcription factor (MetR), putative		972.633	427.275	2.27636		#N/A	#N/A	#N/A	#N/A	#N/A	#N/A	#N/A	AFUA_4G06530	#N/A	#N/A	#N/A	#N/A	#N/A	#N/A
AFUA_1G05490	histone deacetylase complex subunit (Hos4), putative		117.26	51.5702	2.27379		Histone deacetylase complex subunit (Hos4), putative	GO:0005575	cellular_component	CC	ND	3.3105e-7	9.3467e-05	AFUA_1G05490	#N/A	#N/A	#N/A	#N/A	#N/A	#N/A
AFUA_2G04610	DUF967 domain protein		144.976	63.9459	2.26717		#N/A	#N/A	#N/A	#N/A	#N/A	#N/A	#N/A	AFUA_2G04610	#N/A	#N/A	#N/A	#N/A	#N/A	#N/A
AFUA_6G12440	conserved hypothetical protein		54.6916	24.1233	2.26717		Uncharacterized protein	GO:0005575	cellular_component	CC	ND	3.3105e-7	9.3467e-05	AFUA_6G12440	#N/A	#N/A	#N/A	#N/A	#N/A	#N/A
AFUA_6G14320	conserved hypothetical protein		42.8132	18.884	2.26717		Uncharacterized protein	GO:0005575	cellular_component	CC	ND	3.3105e-7	9.3467e-05	AFUA_6G14320	#N/A	#N/A	#N/A	#N/A	#N/A	#N/A
AFUA_3G11810	conserved hypothetical protein		123.173	54.3914	2.26456		Uncharacterized protein	GO:0005575	cellular_component	CC	ND	3.3105e-7	9.3467e-05	AFUA_3G11810	#N/A	#N/A	#N/A	#N/A	#N/A	#N/A
AFUA_4G11580	Mn superoxide dismutase SodB		649.067	286.619	2.26456		Superoxide dismutase (EC 1.15.1.1)	GO:0055114	oxidation-reduction process	BP	IEA	7.8355e-8	6.6367e-05	AFUA_4G11580	Superoxide dismutase (EC 1.15.1.1)	32.07	detoxification	Cell rescue, defense and virulence	8.7992e-06	0.0014049
AFUA_5G13840	NUDIX domain, putative		309.324	137.338	2.25228		NUDIX domain, putative (EC 3.6.1.-)	GO:0008152	metabolic process	BP	IEA	0.0026803	0.41559	AFUA_5G13840	NUDIX domain, putative (EC 3.6.1.-)	32.01.01	oxidative stress response	Cell rescue, defense and virulence	0.030979	0.41473
AFUA_6G13140	3,4-dihydroxy-2-butanone 4-phosphate synthase		275.748	122.602	2.24913		#N/A	#N/A	#N/A	#N/A	#N/A	#N/A	#N/A	AFUA_6G13140	#N/A	#N/A	#N/A	#N/A	#N/A	#N/A
AFUA_1G04120	coenzyme A transferase, putative		72.9681	32.6349	2.2359		Succinyl-CoA:3-ketoacid-coenzyme A transferase (EC 2.8.3.5)	GO:0005575	cellular_component	CC	ND	3.3105e-7	9.3467e-05	AFUA_1G04120	Succinyl-CoA:3-ketoacid-coenzyme A transferase (EC 2.8.3.5)	1.05	C-compound and carbohydrate metabolism	Metabolism	2.515e-06	0.0010864
AFUA_7G02440	conserved glycine-rich protein		47.7937	21.3756	2.2359		Conserved glycine-rich protein	GO:0005575	cellular_component	CC	ND	3.3105e-7	9.3467e-05	AFUA_7G02440	#N/A	#N/A	#N/A	#N/A	#N/A	#N/A
AFUA_4G07350	3-oxo-5-alpha-steroid 4-dehydrogenase family protein		31.9038	14.2689	2.2359		3-oxo-5-alpha-steroid 4-dehydrogenase family protein (EC 1.3.99.5)	GO:0055114	oxidation-reduction process	BP	IEA	7.8355e-8	6.6367e-05	AFUA_4G07350	#N/A	#N/A	#N/A	#N/A	#N/A	#N/A
AFUA_3G09370	spindle-pole body protein (Pcp1), putative		9.65642	4.31882	2.2359		#N/A	#N/A	#N/A	#N/A	#N/A	#N/A	#N/A	AFUA_3G09370	#N/A	#N/A	#N/A	#N/A	#N/A	#N/A
AFUA_3G13490	potassium ion channel Yvc1, putative		18.3055	8.18708	2.2359		#N/A	#N/A	#N/A	#N/A	#N/A	#N/A	#N/A	AFUA_3G13490	#N/A	#N/A	#N/A	#N/A	#N/A	#N/A
AFUA_2G08230	MFS transporter, putative		22.1714	9.91613	2.2359		#N/A	#N/A	#N/A	#N/A	#N/A	#N/A	#N/A	AFUA_2G08230	MFS transporter, putative	20.09.16	cellular export and secretion	Cellular transport, transport facilitation and transport routes	0.00089546	0.066362
AFUA_2G01700	carbon catabolite derepressing protein kinase Snf1, putative		98.7683	44.2804	2.23052		#N/A	#N/A	#N/A	#N/A	#N/A	#N/A	#N/A	AFUA_2G01700	Carbon catabolite derepressing protein kinase Snf1, putative (EC 2.7.1.-)	1.05	C-compound and carbohydrate metabolism	Metabolism	2.515e-06	0.0010864
AFUA_2G11490	acetylglutamate synthase		214.797	96.5391	2.22498		#N/A	#N/A	#N/A	#N/A	#N/A	#N/A	#N/A	AFUA_2G11490	#N/A	#N/A	#N/A	#N/A	#N/A	#N/A
AFUA_2G13860	histone H4.2		1275.21	576.245	2.21296		#N/A	#N/A	#N/A	#N/A	#N/A	#N/A	#N/A	AFUA_2G13860	#N/A	#N/A	#N/A	#N/A	#N/A	#N/A
AFUA_3G02380	U2 auxiliary factor small subunit, putative		161.973	73.2471	2.21133		#N/A	#N/A	#N/A	#N/A	#N/A	#N/A	#N/A	AFUA_3G02380	#N/A	#N/A	#N/A	#N/A	#N/A	#N/A
AFUA_2G08240	C6 transcription factor, putative		23.3937	10.579	2.21133		#N/A	#N/A	#N/A	#N/A	#N/A	#N/A	#N/A	AFUA_2G08240	C6 transcription factor, putative	1.2	secondary metabolism	Metabolism	0.0024405	0.078984
AFUA_2G05980	conserved hypothetical protein		27.1247	12.2663	2.21133		Uncharacterized protein	GO:0005575	cellular_component	CC	ND	3.3105e-7	9.3467e-05	AFUA_2G05980	#N/A	#N/A	#N/A	#N/A	#N/A	#N/A
AFUA_6G11660	amidohydrolase, putative		41.5824	18.8043	2.21133		Amidohydrolase, putative (EC 3.-.-.-)	GO:0005575	cellular_component	CC	ND	3.3105e-7	9.3467e-05	AFUA_6G11660	Amidohydrolase, putative (EC 3.-.-.-)	1.06	lipid, fatty acid and isoprenoid metabolism	Metabolism	4.5362e-06	0.0010864
AFUA_1G12200	conserved hypothetical protein		48.8712	22.1004	2.21133		Uncharacterized protein	GO:0005575	cellular_component	CC	ND	3.3105e-7	9.3467e-05	AFUA_1G12200	#N/A	#N/A	#N/A	#N/A	#N/A	#N/A
AFUA_7G06050	DNA damage-inducible v-SNARE binding protein Ddi1, putative		137.305	62.242	2.20598		#N/A	#N/A	#N/A	#N/A	#N/A	#N/A	#N/A	AFUA_7G06050	#N/A	#N/A	#N/A	#N/A	#N/A	#N/A
AFUA_7G02350	C2 domain protein		28.4216	12.8975	2.20365		#N/A	#N/A	#N/A	#N/A	#N/A	#N/A	#N/A	AFUA_7G02350	#N/A	#N/A	#N/A	#N/A	#N/A	#N/A
AFUA_3G05390	protein-L-isoaspartate O-methyltransferase		89.0631	40.5261	2.19768		#N/A	#N/A	#N/A	#N/A	#N/A	#N/A	#N/A	AFUA_3G05390	#N/A	#N/A	#N/A	#N/A	#N/A	#N/A
AFUA_1G06320	DUF887 domain protein		248.387	113.269	2.1929		#N/A	#N/A	#N/A	#N/A	#N/A	#N/A	#N/A	AFUA_1G06320	#N/A	#N/A	#N/A	#N/A	#N/A	#N/A
AFUA_3G12890	C6 transcription factor GliZ-like, putative		64.2127	29.3344	2.18899		#N/A	#N/A	#N/A	#N/A	#N/A	#N/A	#N/A	AFUA_3G12890	#N/A	#N/A	#N/A	#N/A	#N/A	#N/A
AFUA_5G03690	CRAL/TRIO domain protein		135.613	62.0446	2.18573		#N/A	#N/A	#N/A	#N/A	#N/A	#N/A	#N/A	AFUA_5G03690	Phosphatidylinositol transfer protein sfh5 (PITP sfh5)	20.01.13	lipid/fatty acid transport	Cellular transport, transport facilitation and transport routes	0.048237	0.48136
AFUA_1G06660	CBS domain protein		35.4316	16.2309	2.18298		CBS domain protein	GO:0005575	cellular_component	CC	ND	3.3105e-7	9.3467e-05	AFUA_1G06660	CBS domain protein	01.03.16.03	DNA degradation	Metabolism	0.050511	0.49378
AFUA_6G13770	C6 finger domain protein, putative		43.7305	20.0325	2.18298		#N/A	#N/A	#N/A	#N/A	#N/A	#N/A	#N/A	AFUA_6G13770	#N/A	#N/A	#N/A	#N/A	#N/A	#N/A
AFUA_1G07300	tetracycline transporter, putative		77.883	35.7497	2.17857		#N/A	#N/A	#N/A	#N/A	#N/A	#N/A	#N/A	AFUA_1G07300	Tetracycline transporter, putative	20.01.27	drug/toxin transport	Cellular transport, transport facilitation and transport routes	0.0012687	0.067524
AFUA_5G09780	MFS multidrug transporter, putative		15.7474	7.32471	2.1499		#N/A	#N/A	#N/A	#N/A	#N/A	#N/A	#N/A	AFUA_5G09780	MFS multidrug transporter, putative	32.07	detoxification	Cell rescue, defense and virulence	8.7992e-06	0.0014049
AFUA_8G05820	DNA mismatch repair protein, putative		5.35019	2.48858	2.1499		#N/A	#N/A	#N/A	#N/A	#N/A	#N/A	#N/A	AFUA_8G05820	#N/A	#N/A	#N/A	#N/A	#N/A	#N/A
AFUA_3G08330	ATP-dependent Clp protease, proteolytic subunit ClpP		53.6843	24.9706	2.1499		#N/A	#N/A	#N/A	#N/A	#N/A	#N/A	#N/A	AFUA_3G08330	#N/A	#N/A	#N/A	#N/A	#N/A	#N/A
AFUA_3G13340	Rho-like small GTPase, putative		48.9556	22.7711	2.1499		#N/A	#N/A	#N/A	#N/A	#N/A	#N/A	#N/A	AFUA_3G13340	#N/A	#N/A	#N/A	#N/A	#N/A	#N/A
AFUA_5G07410	#N/A		8.11721	3.77562	2.1499		Phenylacetyl-CoA ligase (EC 6.2.1.3)	GO:0005575	cellular_component	CC	ND	3.3105e-7	9.3467e-05	AFUA_5G07410	Phenylacetyl-CoA ligase (EC 6.2.1.3)	1.05	C-compound and carbohydrate metabolism	Metabolism	2.515e-06	0.0010864
AFUA_3G08610	DUF124 domain protein		14.1444	6.57908	2.1499		DUF124 domain protein	GO:0005575	cellular_component	CC	ND	3.3105e-7	9.3467e-05	AFUA_3G08610	#N/A	#N/A	#N/A	#N/A	#N/A	#N/A
AFUA_1G16560	MIF domain protein		11.5225	5.35954	2.1499		MIF domain protein	GO:0005575	cellular_component	CC	ND	3.3105e-7	9.3467e-05	AFUA_1G16560	#N/A	#N/A	#N/A	#N/A	#N/A	#N/A
AFUA_3G10090	dihydroneopterin aldolase domain protein		13.4211	6.24265	2.1499		Dihydroneopterin aldolase domain protein (EC 4.1.2.25)	GO:0005575	cellular_component	CC	ND	3.3105e-7	9.3467e-05	AFUA_3G10090	#N/A	#N/A	#N/A	#N/A	#N/A	#N/A
AFUA_4G07300	conserved hypothetical protein		32.8071	15.2598	2.1499		Uncharacterized protein	GO:0005575	cellular_component	CC	ND	3.3105e-7	9.3467e-05	AFUA_4G07300	#N/A	#N/A	#N/A	#N/A	#N/A	#N/A
AFUA_6G13470	conserved hypothetical protein		13.5364	6.29631	2.1499		Uncharacterized protein	GO:0005575	cellular_component	CC	ND	3.3105e-7	9.3467e-05	AFUA_6G13470	#N/A	#N/A	#N/A	#N/A	#N/A	#N/A
AFUA_5G08640	integral membrane protein		28.4592	13.2374	2.1499		Integral membrane protein	GO:0005575	cellular_component	CC	ND	3.3105e-7	9.3467e-05	AFUA_5G08640	#N/A	#N/A	#N/A	#N/A	#N/A	#N/A
AFUA_2G12280	HET domain protein, putative		7.8737	3.66236	2.1499		HET domain protein, putative	GO:0005575	cellular_component	CC	ND	3.3105e-7	9.3467e-05	AFUA_2G12280	HET domain protein, putative	1.2	secondary metabolism	Metabolism	0.0024405	0.078984
AFUA_2G06300	nuclear division Rft1 protein, putative		50.9808	23.7131	2.1499		#N/A	#N/A	#N/A	#N/A	#N/A	#N/A	#N/A	AFUA_2G06300	#N/A	#N/A	#N/A	#N/A	#N/A	#N/A
AFUA_7G01530	AMP-binding enzyme, putative		138.27	64.3145	2.1499		AMP-binding enzyme, putative (EC 6.2.1.-)	GO:0005575	cellular_component	CC	ND	3.3105e-7	9.3467e-05	AFUA_7G01530	AMP-binding enzyme, putative (EC 6.2.1.-)	1.06	lipid, fatty acid and isoprenoid metabolism	Metabolism	4.5362e-06	0.0010864
AFUA_1G03140	glycosyl hydrolase, putative		7.21255	3.35483	2.1499		Glycosyl hydrolase, putative (EC 3.2.1.-)	GO:0008152	metabolic process	BP	IEA	0.0026803	0.41559	AFUA_1G03140	Glycosyl hydrolase, putative (EC 3.2.1.-)	1.05	C-compound and carbohydrate metabolism	Metabolism	2.515e-06	0.0010864
AFUA_1G11880	acetoacetyl-CoA synthase		20.2467	9.41749	2.1499		Acetoacetyl-CoA synthase (EC 6.2.1.16)	GO:0005575	cellular_component	CC	ND	3.3105e-7	9.3467e-05	AFUA_1G11880	Acetoacetyl-CoA synthase (EC 6.2.1.16)	1.06	lipid, fatty acid and isoprenoid metabolism	Metabolism	4.5362e-06	0.0010864
AFUA_8G05360	conserved hypothetical protein		40.2061	18.7014	2.1499		#N/A	#N/A	#N/A	#N/A	#N/A	#N/A	#N/A	AFUA_8G05360	#N/A	#N/A	#N/A	#N/A	#N/A	#N/A
AFUA_3G14710	toxin biosynthesis proten (Fum3), putative		12.9786	6.03685	2.1499		#N/A	#N/A	#N/A	#N/A	#N/A	#N/A	#N/A	AFUA_3G14710	Toxin biosynthesis proten (Fum3), putative	1.2	secondary metabolism	Metabolism	0.0024405	0.078984
AFUA_1G05910	conserved hypothetical protein		10.0515	4.67535	2.1499		Uncharacterized protein	GO:0005575	cellular_component	CC	ND	3.3105e-7	9.3467e-05	AFUA_1G05910	#N/A	#N/A	#N/A	#N/A	#N/A	#N/A
AFUA_1G16490	short chain dehydrogenase/reductase, putative		15.0453	6.99813	2.1499		Short chain dehydrogenase/reductase, putative (EC 1.1.1.-)	GO:0055114	oxidation-reduction process	BP	IEA	7.8355e-8	6.6367e-05	AFUA_1G16490	Short chain dehydrogenase/reductase, putative (EC 1.1.1.-)	1.05	C-compound and carbohydrate metabolism	Metabolism	2.515e-06	0.0010864
AFUA_5G11170	nucleosome remodeling complex ATPase subunit (Snf2h), putative		9.57289	4.45271	2.1499		Nucleosome remodeling complex ATPase subunit (Snf2h), putative	GO:0005575	cellular_component	CC	ND	3.3105e-7	9.3467e-05	AFUA_5G11170	#N/A	#N/A	#N/A	#N/A	#N/A	#N/A
AFUA_1G17290	conserved hypothetical protein		10.073	4.68532	2.1499		Uncharacterized protein	GO:0005575	cellular_component	CC	ND	3.3105e-7	9.3467e-05	AFUA_1G17290	#N/A	#N/A	#N/A	#N/A	#N/A	#N/A
AFUA_2G13880	SH3 domain protein		16.8521	7.83857	2.1499		SH3 domain protein	GO:0005575	cellular_component	CC	ND	3.3105e-7	9.3467e-05	AFUA_2G13880	#N/A	#N/A	#N/A	#N/A	#N/A	#N/A
AFUA_5G07170	nucleoside-diphosphate-sugar epimerase, putative		69.0675	32.1259	2.1499		Nucleoside-diphosphate-sugar epimerase, putative	GO:0005575	cellular_component	CC	ND	3.3105e-7	9.3467e-05	AFUA_5G07170	#N/A	#N/A	#N/A	#N/A	#N/A	#N/A
AFUA_2G05350	MFS transporter, putative		22.1275	10.2923	2.1499		#N/A	#N/A	#N/A	#N/A	#N/A	#N/A	#N/A	AFUA_2G05350	MFS transporter, putative	32.07	detoxification	Cell rescue, defense and virulence	8.7992e-06	0.0014049
AFUA_3G10900	conserved hypothetical protein		24.1032	11.2113	2.1499		Uncharacterized protein	GO:0005575	cellular_component	CC	ND	3.3105e-7	9.3467e-05	AFUA_3G10900	#N/A	#N/A	#N/A	#N/A	#N/A	#N/A
AFUA_3G12255	conserved hypothetical protein		21.6707	10.0799	2.1499		Uncharacterized protein	GO:0005575	cellular_component	CC	ND	3.3105e-7	9.3467e-05	AFUA_3G12255	#N/A	#N/A	#N/A	#N/A	#N/A	#N/A
AFUA_3G12650	conserved hypothetical protein		8.62084	4.00988	2.1499		Uncharacterized protein	GO:0005575	cellular_component	CC	ND	3.3105e-7	9.3467e-05	AFUA_3G12650	#N/A	#N/A	#N/A	#N/A	#N/A	#N/A
AFUA_4G08610	calcium homeostasis protein Regucalcin, putative		16.7525	7.79225	2.1499		Calcium homeostasis protein Regucalcin, putative	GO:0005575	cellular_component	CC	ND	3.3105e-7	9.3467e-05	AFUA_4G08610	Calcium homeostasis protein Regucalcin, putative	32.07	detoxification	Cell rescue, defense and virulence	8.7992e-06	0.0014049
AFUA_6G03760	HhH-GPD family base excision DNA repair protein		30.0906	13.9963	2.1499		HhH-GPD family base excision DNA repair protein (EC 4.2.99.18)	GO:0005575	cellular_component	CC	ND	3.3105e-7	9.3467e-05	AFUA_6G03760	#N/A	#N/A	#N/A	#N/A	#N/A	#N/A
AFUA_6G06390	hypothetical protein		74.9876	34.8796	2.1499		Uncharacterized protein	GO:0005575	cellular_component	CC	ND	3.3105e-7	9.3467e-05	AFUA_6G06390	#N/A	#N/A	#N/A	#N/A	#N/A	#N/A
AFUA_6G07650	hypothetical protein		13.8135	6.42519	2.1499		Uncharacterized protein	GO:0005575	cellular_component	CC	ND	3.3105e-7	9.3467e-05	AFUA_6G07650	#N/A	#N/A	#N/A	#N/A	#N/A	#N/A
AFUA_6G08290	ADP-ribosylation factor family protein		53.6843	24.9706	2.1499		#N/A	#N/A	#N/A	#N/A	#N/A	#N/A	#N/A	AFUA_6G08290	#N/A	#N/A	#N/A	#N/A	#N/A	#N/A
AFUA_6G09250	exo-beta-1,3-glucanase, putative		11.3291	5.26958	2.1499		Probable glucan 1,3-beta-glucosidase D (EC 3.2.1.58) (Exo-1,3-beta-glucanase D)	GO:0008152	metabolic process	BP	IEA	0.0026803	0.41559	AFUA_6G09250	Probable glucan 1,3-beta-glucosidase D (EC 3.2.1.58) (Exo-1,3-beta-glucanase D)	1.05	C-compound and carbohydrate metabolism	Metabolism	2.515e-06	0.0010864
AFUA_8G01560	aldo-keto reductase (YakC), putative		14.4031	6.69943	2.1499		Aldo-keto reductase (YakC), putative (EC 1.1.1.-)	GO:0055114	oxidation-reduction process	BP	IEA	7.8355e-8	6.6367e-05	AFUA_8G01560	Aldo-keto reductase (YakC), putative (EC 1.1.1.-)	1.05	C-compound and carbohydrate metabolism	Metabolism	2.515e-06	0.0010864
AFUA_3G07200	DEAD/DEAH box RNA helicase, putative		8.03439	3.7371	2.1499		DEAD/DEAH box RNA helicase, putative (EC 3.6.1.-)	GO:0005575	cellular_component	CC	ND	3.3105e-7	9.3467e-05	AFUA_3G07200	#N/A	#N/A	#N/A	#N/A	#N/A	#N/A
AFUA_3G07940	phosphoinositide-specific phospholipase C, putative		7.23464	3.3651	2.1499		Phosphoinositide phospholipase C (EC 3.1.4.11)	GO:0005575	cellular_component	CC	ND	3.3105e-7	9.3467e-05	AFUA_3G07940	Phosphoinositide phospholipase C (EC 3.1.4.11)	1.06	lipid, fatty acid and isoprenoid metabolism	Metabolism	4.5362e-06	0.0010864
AFUA_1G08990	lactonohydrolase, putative		34.3997	16.0006	2.1499		Lactonohydrolase, putative (EC 3.1.1.17)	GO:0008152	metabolic process	BP	IEA	0.0026803	0.41559	AFUA_1G08990	Lactonohydrolase, putative (EC 3.1.1.17)	1.05	C-compound and carbohydrate metabolism	Metabolism	2.515e-06	0.0010864
AFUA_1G15350	homoserine acetyltransferase family protein		13.977	6.50122	2.1499		Homoserine acetyltransferase family protein	GO:0005575	cellular_component	CC	ND	3.3105e-7	9.3467e-05	AFUA_1G15350	#N/A	#N/A	#N/A	#N/A	#N/A	#N/A
AFUA_5G12600	DNA excision repair protein (Rad5), putative		10.8853	5.06316	2.1499		DNA repair protein rad5 (EC 3.6.4.-)	GO:0005575	cellular_component	CC	ND	3.3105e-7	9.3467e-05	AFUA_5G12600	#N/A	#N/A	#N/A	#N/A	#N/A	#N/A
AFUA_2G13660	conserved hypothetical protein		11.9298	5.54902	2.1499		Uncharacterized protein	GO:0005575	cellular_component	CC	ND	3.3105e-7	9.3467e-05	AFUA_2G13660	#N/A	#N/A	#N/A	#N/A	#N/A	#N/A
AFUA_5G00860	Ankyrin repeat protein		18.1005	8.41921	2.1499		Ankyrin repeat protein	GO:0005575	cellular_component	CC	ND	3.3105e-7	9.3467e-05	AFUA_5G00860	#N/A	#N/A	#N/A	#N/A	#N/A	#N/A
AFUA_6G04830	HATPase_c domain protein, putative		2.67661	1.24499	2.1499		HATPase_c domain protein, putative	GO:0005575	cellular_component	CC	ND	3.3105e-7	9.3467e-05	AFUA_6G04830	#N/A	#N/A	#N/A	#N/A	#N/A	#N/A
AFUA_8G04300	C2H2 finger domain protein, putative		3.97662	1.84967	2.1499		#N/A	#N/A	#N/A	#N/A	#N/A	#N/A	#N/A	AFUA_8G04300	#N/A	#N/A	#N/A	#N/A	#N/A	#N/A
AFUA_2G15710	conserved hypothetical protein		44.5681	20.7303	2.1499		Uncharacterized protein	GO:0005575	cellular_component	CC	ND	3.3105e-7	9.3467e-05	AFUA_2G15710	#N/A	#N/A	#N/A	#N/A	#N/A	#N/A
AFUA_5G02170	nuclear condensin complex subunit 3, putative		12.6429	5.88068	2.1499		#N/A	#N/A	#N/A	#N/A	#N/A	#N/A	#N/A	AFUA_5G02170	#N/A	#N/A	#N/A	#N/A	#N/A	#N/A
AFUA_5G04180	conserved hypothetical protein		38.3045	17.8169	2.1499		Uncharacterized protein	GO:0005575	cellular_component	CC	ND	3.3105e-7	9.3467e-05	AFUA_5G04180	#N/A	#N/A	#N/A	#N/A	#N/A	#N/A
AFUA_3G10500	conserved hypothetical protein		21.3283	9.9206	2.1499		Uncharacterized protein	GO:0005575	cellular_component	CC	ND	3.3105e-7	9.3467e-05	AFUA_3G10500	#N/A	#N/A	#N/A	#N/A	#N/A	#N/A
AFUA_1G02350	MFS transporter, putative		8.65242	4.02457	2.1499		#N/A	#N/A	#N/A	#N/A	#N/A	#N/A	#N/A	AFUA_1G02350	MFS transporter, putative	20.09.16	cellular export and secretion	Cellular transport, transport facilitation and transport routes	0.00089546	0.066362
AFUA_1G14700	MFS allantoate transporter, putative		18.3822	8.55025	2.1499		#N/A	#N/A	#N/A	#N/A	#N/A	#N/A	#N/A	AFUA_1G14700	#N/A	#N/A	#N/A	#N/A	#N/A	#N/A
AFUA_2G04510	cysteine-binding protein FliY, putative		8.73238	4.06176	2.1499		#N/A	#N/A	#N/A	#N/A	#N/A	#N/A	#N/A	AFUA_2G04510	#N/A	#N/A	#N/A	#N/A	#N/A	#N/A
AFUA_2G13270	alcohol dehydrogenase, putative		12.9077	6.00386	2.1499		Alcohol dehydrogenase, putative (EC 1.1.1.-)	GO:0055114	oxidation-reduction process	BP	IEA	7.8355e-8	6.6367e-05	AFUA_2G13270	Alcohol dehydrogenase, putative (EC 1.1.1.-)	1.05	C-compound and carbohydrate metabolism	Metabolism	2.515e-06	0.0010864
AFUA_3G05800	serum paraoxonase/arylesterase family protein		15.4386	7.18109	2.1499		Serum paraoxonase/arylesterase family protein (EC 3.1.-.-)	GO:0005575	cellular_component	CC	ND	3.3105e-7	9.3467e-05	AFUA_3G05800	Serum paraoxonase/arylesterase family protein (EC 3.1.-.-)	1.06	lipid, fatty acid and isoprenoid metabolism	Metabolism	4.5362e-06	0.0010864
AFUA_3G10040	cyclin-like protein (Clg1), putative		19.8497	9.23283	2.1499		Cyclin-like protein (Clg1), putative	GO:0005575	cellular_component	CC	ND	3.3105e-7	9.3467e-05	AFUA_3G10040	#N/A	#N/A	#N/A	#N/A	#N/A	#N/A
AFUA_3G14550	RNA polymerase II general transcription and DNA repair factor TFIIH component Tfb5, putative		64.7153	30.1016	2.1499		#N/A	#N/A	#N/A	#N/A	#N/A	#N/A	#N/A	AFUA_3G14550	#N/A	#N/A	#N/A	#N/A	#N/A	#N/A
AFUA_5G06230	GABA permease, putative		8.58949	3.9953	2.1499		#N/A	#N/A	#N/A	#N/A	#N/A	#N/A	#N/A	AFUA_5G06230	GABA permease, putative	1.2	secondary metabolism	Metabolism	0.0024405	0.078984
AFUA_5G14080	conserved hypothetical protein		12.2707	5.70757	2.1499		Uncharacterized protein	GO:0005575	cellular_component	CC	ND	3.3105e-7	9.3467e-05	AFUA_5G14080	#N/A	#N/A	#N/A	#N/A	#N/A	#N/A
AFUA_7G02200	meiotic recombination protein (Dmc1), putative		13.9357	6.48205	2.1499		#N/A	#N/A	#N/A	#N/A	#N/A	#N/A	#N/A	AFUA_7G02200	#N/A	#N/A	#N/A	#N/A	#N/A	#N/A
AFUA_8G04100	N-acetylglucosamine-6-phosphate deacetylase (NagA), putative		32.8832	15.2952	2.1499		N-acetylglucosamine-6-phosphate deacetylase (EC 3.5.1.25) (GlcNAc 6-P deacetylase)	GO:0005575	cellular_component	CC	ND	3.3105e-7	9.3467e-05	AFUA_8G04100	N-acetylglucosamine-6-phosphate deacetylase (EC 3.5.1.25) (GlcNAc 6-P deacetylase)	1.05	C-compound and carbohydrate metabolism	Metabolism	2.515e-06	0.0010864
AFUA_2G07420	actin-bundling protein Sac6, putative		389.912	181.703	2.14588		#N/A	#N/A	#N/A	#N/A	#N/A	#N/A	#N/A	AFUA_2G07420	Actin-bundling protein Sac6, putative	20.09.16	cellular export and secretion	Cellular transport, transport facilitation and transport routes	0.00089546	0.066362
AFUA_1G05690	conserved hypothetical protein		89.7477	42.035	2.13507		Uncharacterized protein	GO:0005575	cellular_component	CC	ND	3.3105e-7	9.3467e-05	AFUA_1G05690	#N/A	#N/A	#N/A	#N/A	#N/A	#N/A
AFUA_3G10400	dolichol-phosphate mannosyltransferase, putative		218.927	102.725	2.13121		Dolichol-phosphate mannosyltransferase, putative (EC 2.3.1.-)	GO:0008152	metabolic process	BP	IEA	0.0026803	0.41559	AFUA_3G10400	Dolichol-phosphate mannosyltransferase, putative (EC 2.3.1.-)	1.05	C-compound and carbohydrate metabolism	Metabolism	2.515e-06	0.0010864
AFUA_1G10350	phosphoglycerate kinase PgkA, putative		1652.35	775.403	2.13095		#N/A	#N/A	#N/A	#N/A	#N/A	#N/A	#N/A	AFUA_1G10350	Phosphoglycerate kinase (EC 2.7.2.3)	1.05	C-compound and carbohydrate metabolism	Metabolism	2.515e-06	0.0010864
AFUA_6G07340	kynurenine 3-monooxygenase, putative		77.3556	36.4094	2.12461		Kynurenine 3-monooxygenase (EC 1.14.13.9) (Biosynthesis of nicotinic acid protein 4) (Kynurenine 3-hydroxylase)	GO:0055114	oxidation-reduction process	BP	IEA	7.8355e-8	6.6367e-05	AFUA_6G07340	Kynurenine 3-monooxygenase (EC 1.14.13.9) (Biosynthesis of nicotinic acid protein 4) (Kynurenine 3-hydroxylase)	1.05	C-compound and carbohydrate metabolism	Metabolism	2.515e-06	0.0010864
AFUA_3G08750	conserved hypothetical protein		90.4982	42.5952	2.12461		#N/A	#N/A	#N/A	#N/A	#N/A	#N/A	#N/A	AFUA_3G08750	#N/A	#N/A	#N/A	#N/A	#N/A	#N/A
AFUA_4G06780	mitochondrial carrier protein, putative		151.935	71.7748	2.11682		#N/A	#N/A	#N/A	#N/A	#N/A	#N/A	#N/A	AFUA_4G06780	#N/A	#N/A	#N/A	#N/A	#N/A	#N/A
AFUA_6G13760	alpha-1,2-mannosidase, putative subfamily		32.17	15.2406	2.11081		Alpha-1,2-mannosidase, putative subfamily	GO:0005575	cellular_component	CC	ND	3.3105e-7	9.3467e-05	AFUA_6G13760	#N/A	#N/A	#N/A	#N/A	#N/A	#N/A
AFUA_4G03370	#N/A		47.4178	22.4643	2.11081		#N/A	#N/A	#N/A	#N/A	#N/A	#N/A	#N/A	AFUA_4G03370	GABA permease (Uga4), putative	1.2	secondary metabolism	Metabolism	0.0024405	0.078984
AFUA_7G01410	UPF0183 domain protein		61.4718	29.1223	2.11081		UPF0183 domain protein	GO:0005575	cellular_component	CC	ND	3.3105e-7	9.3467e-05	AFUA_7G01410	#N/A	#N/A	#N/A	#N/A	#N/A	#N/A
AFUA_1G02830	endoplasmic reticulum and nuclear membrane proteinc Npl4, putative		39.067	18.5081	2.11081		#N/A	#N/A	#N/A	#N/A	#N/A	#N/A	#N/A	AFUA_1G02830	#N/A	#N/A	#N/A	#N/A	#N/A	#N/A
AFUA_1G02130	DUF221 domain protein, putative		61.0306	28.9133	2.11081		#N/A	#N/A	#N/A	#N/A	#N/A	#N/A	#N/A	AFUA_1G02130	DUF221 domain protein, putative	43.01.03.09	development of asco- basidio- or zygospore	Cell type differentiation	0.035951	0.41473
AFUA_5G07600	inositol 5-phosphatase, putative		91.9759	43.7538	2.10212		Inositol 5-phosphatase, putative	GO:0005575	cellular_component	CC	ND	3.3105e-7	9.3467e-05	AFUA_5G07600	Inositol 5-phosphatase, putative	1.06	lipid, fatty acid and isoprenoid metabolism	Metabolism	4.5362e-06	0.0010864
AFUA_6G06550	SNF2 family helicase/ATPase, putative		14.1534	6.73288	2.10212		SNF2 family helicase/ATPase, putative	GO:0008152	metabolic process	BP	IEA	0.0026803	0.41559	AFUA_6G06550	#N/A	#N/A	#N/A	#N/A	#N/A	#N/A
AFUA_6G12540	RING finger protein		77.9984	37.1045	2.10212		#N/A	#N/A	#N/A	#N/A	#N/A	#N/A	#N/A	AFUA_6G12540	#N/A	#N/A	#N/A	#N/A	#N/A	#N/A
AFUA_5G07950	serine/threonine protein kinase, putative		31.0247	14.7587	2.10212		#N/A	#N/A	#N/A	#N/A	#N/A	#N/A	#N/A	AFUA_5G07950	#N/A	#N/A	#N/A	#N/A	#N/A	#N/A
AFUA_1G14940	protein translocation complex componenet (Npl1), putative		135.364	64.5372	2.09746		#N/A	#N/A	#N/A	#N/A	#N/A	#N/A	#N/A	AFUA_1G14940	#N/A	#N/A	#N/A	#N/A	#N/A	#N/A
AFUA_5G08235	NUDIX family hydrolase, putative		118.485	56.5251	2.09615		NUDIX family hydrolase, putative	GO:0005575	cellular_component	CC	ND	3.3105e-7	9.3467e-05	AFUA_5G08235	#N/A	#N/A	#N/A	#N/A	#N/A	#N/A
AFUA_1G12900	cell wall biogenesis protein Mhp1, putative		30.8359	14.7107	2.09615		Cell wall biogenesis protein Mhp1, putative	GO:0005575	cellular_component	CC	ND	3.3105e-7	9.3467e-05	AFUA_1G12900	#N/A	#N/A	#N/A	#N/A	#N/A	#N/A
AFUA_2G02840	TBC domain protein, putative		82.5449	39.4232	2.09382		#N/A	#N/A	#N/A	#N/A	#N/A	#N/A	#N/A	AFUA_2G02840	#N/A	#N/A	#N/A	#N/A	#N/A	#N/A
AFUA_2G02480	conserved hypothetical protein		60.6126	29.0224	2.08847		#N/A	#N/A	#N/A	#N/A	#N/A	#N/A	#N/A	AFUA_2G02480	#N/A	#N/A	#N/A	#N/A	#N/A	#N/A
AFUA_6G07700	chromosomal organization and DNA repair protein Mms21, putative		32.2537	15.4437	2.08847		#N/A	#N/A	#N/A	#N/A	#N/A	#N/A	#N/A	AFUA_6G07700	#N/A	#N/A	#N/A	#N/A	#N/A	#N/A
AFUA_2G14680	conserved hypothetical protein		123.24	59.0098	2.08847		#N/A	#N/A	#N/A	#N/A	#N/A	#N/A	#N/A	AFUA_2G14680	#N/A	#N/A	#N/A	#N/A	#N/A	#N/A
AFUA_6G10480	peptidyl-prolyl cis-trans isomerase, putative		66.3733	31.7808	2.08847		Peptidyl-prolyl cis-trans isomerase-like 3 (PPIase) (EC 5.2.1.8) (Rotamase)	GO:0005575	cellular_component	CC	ND	3.3105e-7	9.3467e-05	AFUA_6G10480	#N/A	#N/A	#N/A	#N/A	#N/A	#N/A
AFUA_1G12910	ABC fatty acid transporter, putative		22.6869	10.8629	2.08847		#N/A	#N/A	#N/A	#N/A	#N/A	#N/A	#N/A	AFUA_1G12910	ABC fatty acid transporter, putative	1.06	lipid, fatty acid and isoprenoid metabolism	Metabolism	4.5362e-06	0.0010864
AFUA_2G11660	Rad4 family protein		34.9942	16.7559	2.08847		#N/A	#N/A	#N/A	#N/A	#N/A	#N/A	#N/A	AFUA_2G11660	#N/A	#N/A	#N/A	#N/A	#N/A	#N/A
AFUA_6G07180	GPI transamidase component PIG-S, putative		25.9489	12.4248	2.08847		#N/A	#N/A	#N/A	#N/A	#N/A	#N/A	#N/A	AFUA_6G07180	#N/A	#N/A	#N/A	#N/A	#N/A	#N/A
AFUA_3G14470	Pyridoxal-phosphate dependent enzyme, putative		183.584	88.2381	2.08055		Pyridoxal-phosphate dependent enzyme, putative (EC 4.3.1.19)	GO:0005575	cellular_component	CC	ND	3.3105e-7	9.3467e-05	AFUA_3G14470	Pyridoxal-phosphate dependent enzyme, putative (EC 4.3.1.19)	01.01.09.02.02	degradation of serine	Metabolism	0.017295	0.30683
AFUA_8G04580	conserved hypothetical protein		120.707	58.0814	2.07824		Uncharacterized protein	GO:0008152	metabolic process	BP	IEA	0.0026803	0.41559	AFUA_8G04580	#N/A	#N/A	#N/A	#N/A	#N/A	#N/A
AFUA_3G13150	deacetylase complex subunit Sds3, putative		54.0443	26.0049	2.07824		Deacetylase complex subunit Sds3, putative	GO:0005575	cellular_component	CC	ND	3.3105e-7	9.3467e-05	AFUA_3G13150	#N/A	#N/A	#N/A	#N/A	#N/A	#N/A
AFUA_6G08740	3-dehydroshikimate dehydratase, putative		77.4025	37.2443	2.07824		3-dehydroshikimate dehydratase, putative (EC 4.2.1.-)	GO:0005575	cellular_component	CC	ND	3.3105e-7	9.3467e-05	AFUA_6G08740	3-dehydroshikimate dehydratase, putative (EC 4.2.1.-)	1.05	C-compound and carbohydrate metabolism	Metabolism	2.515e-06	0.0010864
AFUA_3G07300	ABC multidrug transporter, putative		83.3874	40.2785	2.07027		ABC multidrug transporter, putative (EC 3.6.3.-)	GO:0008152	metabolic process	BP	IEA	0.0026803	0.41559	AFUA_3G07300	ABC multidrug transporter, putative (EC 3.6.3.-)	32.07	detoxification	Cell rescue, defense and virulence	8.7992e-06	0.0014049
AFUA_6G10900	UV-endonuclease UVE-1		94.6421	45.8559	2.0639		UV-endonuclease UVE-1	GO:0005575	cellular_component	CC	ND	3.3105e-7	9.3467e-05	AFUA_6G10900	#N/A	#N/A	#N/A	#N/A	#N/A	#N/A
AFUA_1G12875	conserved hypothetical protein		41.6843	20.1968	2.0639		#N/A	#N/A	#N/A	#N/A	#N/A	#N/A	#N/A	AFUA_1G12875	#N/A	#N/A	#N/A	#N/A	#N/A	#N/A
AFUA_4G10120	C6 finger domain protein, putative		16.267	7.88168	2.0639		#N/A	#N/A	#N/A	#N/A	#N/A	#N/A	#N/A	AFUA_4G10120	#N/A	#N/A	#N/A	#N/A	#N/A	#N/A
AFUA_3G06730	MFS sugar transporter, putative		19.2825	9.34274	2.0639		#N/A	#N/A	#N/A	#N/A	#N/A	#N/A	#N/A	AFUA_3G06730	#N/A	#N/A	#N/A	#N/A	#N/A	#N/A
AFUA_5G04155	conserved hypothetical protein		218.041	105.645	2.0639		Uncharacterized protein	GO:0005575	cellular_component	CC	ND	3.3105e-7	9.3467e-05	AFUA_5G04155	#N/A	#N/A	#N/A	#N/A	#N/A	#N/A
AFUA_1G12850	nitrate transporter CrnA		22.2753	10.7928	2.0639		#N/A	#N/A	#N/A	#N/A	#N/A	#N/A	#N/A	AFUA_1G12850	Nitrate transporter CrnA	1.02	nitrogen, sulfur and selenium metabolism	Metabolism	0.011195	0.25186
AFUA_5G02430	ATP dependent DNA ligase domain protein		12.4185	6.01701	2.0639		ATP dependent DNA ligase domain protein (EC 6.5.1.1)	GO:0005575	cellular_component	CC	ND	3.3105e-7	9.3467e-05	AFUA_5G02430	#N/A	#N/A	#N/A	#N/A	#N/A	#N/A
AFUA_6G02470	fumarate hydratase, putative		635.298	309.07	2.05551		#N/A	#N/A	#N/A	#N/A	#N/A	#N/A	#N/A	AFUA_6G02470	Fumarate hydratase, putative (EC 4.2.1.2)	1.05	C-compound and carbohydrate metabolism	Metabolism	2.515e-06	0.0010864
AFUA_4G00940	oxidoreductase, short chain dehydrogenase/reductase family, putative		276.29	134.859	2.04873		Oxidoreductase, short chain dehydrogenase/reductase family, putative (EC 1.1.1.-) (Fragment)	GO:0055114	oxidation-reduction process	BP	IEA	7.8355e-8	6.6367e-05	AFUA_4G00940	Oxidoreductase, short chain dehydrogenase/reductase family, putative (EC 1.1.1.-) (Fragment)	1.05	C-compound and carbohydrate metabolism	Metabolism	2.515e-06	0.0010864
AFUA_2G09990	conserved hypothetical protein		62.4897	30.5196	2.04752		#N/A	#N/A	#N/A	#N/A	#N/A	#N/A	#N/A	AFUA_2G09990	#N/A	#N/A	#N/A	#N/A	#N/A	#N/A
AFUA_7G00920	UbiD family decarboxylase, putative		254.038	124.382	2.0424		UbiD family decarboxylase, putative	GO:0005575	cellular_component	CC	ND	3.3105e-7	9.3467e-05	AFUA_7G00920	#N/A	#N/A	#N/A	#N/A	#N/A	#N/A
AFUA_2G12030	histone acetyltransferase type b catalytic subunit, putative		62.8793	30.7869	2.0424		#N/A	#N/A	#N/A	#N/A	#N/A	#N/A	#N/A	AFUA_2G12030	#N/A	#N/A	#N/A	#N/A	#N/A	#N/A
AFUA_7G04510	conserved hypothetical protein		19.9911	9.78803	2.0424		#N/A	#N/A	#N/A	#N/A	#N/A	#N/A	#N/A	AFUA_7G04510	#N/A	#N/A	#N/A	#N/A	#N/A	#N/A
AFUA_6G07910	PH domain protein		282.226	138.612	2.03608		#N/A	#N/A	#N/A	#N/A	#N/A	#N/A	#N/A	AFUA_6G07910	PH domain protein	32.01.01	oxidative stress response	Cell rescue, defense and virulence	0.030979	0.41473
AFUA_2G12110	YagE family protein		45.9176	22.5902	2.03263		#N/A	#N/A	#N/A	#N/A	#N/A	#N/A	#N/A	AFUA_2G12110	#N/A	#N/A	#N/A	#N/A	#N/A	#N/A
AFUA_6G04030	conserved hypothetical protein		292.452	143.878	2.03263		Uncharacterized protein	GO:0005575	cellular_component	CC	ND	3.3105e-7	9.3467e-05	AFUA_6G04030	#N/A	#N/A	#N/A	#N/A	#N/A	#N/A
AFUA_2G08080	phospholipid metabolism enzyme regulator, putative		54.1697	26.65	2.03263		Phospholipid metabolism enzyme regulator, putative	GO:0005575	cellular_component	CC	ND	3.3105e-7	9.3467e-05	AFUA_2G08080	Phospholipid metabolism enzyme regulator, putative	1.06	lipid, fatty acid and isoprenoid metabolism	Metabolism	4.5362e-06	0.0010864
AFUA_3G12660	C6 finger domain protein Acr-2, putative		78.611	38.6745	2.03263		#N/A	#N/A	#N/A	#N/A	#N/A	#N/A	#N/A	AFUA_3G12660	C6 finger domain protein Acr-2, putative	32.05.01.03	chemical agent resistance	Cell rescue, defense and virulence	0.02846	0.40095
AFUA_6G03660	onanonoxo-7-onima-8-eninoihtemlysoneda		210.737	103.677	2.03263		Onanonoxo-7-onima-8-eninoihtemlysoneda (EC 2.6.1.62)	GO:0005575	cellular_component	CC	ND	3.3105e-7	9.3467e-05	AFUA_6G03660	#N/A	#N/A	#N/A	#N/A	#N/A	#N/A
AFUA_4G03910	RING finger protein (Zin), putative		42.3064	20.871	2.02705		RING finger protein (Zin), putative	GO:0005575	cellular_component	CC	ND	3.3105e-7	9.3467e-05	AFUA_4G03910	#N/A	#N/A	#N/A	#N/A	#N/A	#N/A
AFUA_1G12370	DUF255 domain protein		47.2422	23.3475	2.02344		DUF255 domain protein	GO:0005575	cellular_component	CC	ND	3.3105e-7	9.3467e-05	AFUA_1G12370	#N/A	#N/A	#N/A	#N/A	#N/A	#N/A
AFUA_1G10050	DEAD/DEAH box RNA helicase		152.017	75.2415	2.02039		Pre-mRNA-processing ATP-dependent RNA helicase prp5 (EC 3.6.4.13)	GO:0005575	cellular_component	CC	ND	3.3105e-7	9.3467e-05	AFUA_1G10050	#N/A	#N/A	#N/A	#N/A	#N/A	#N/A
AFUA_2G02530	casein kinase I, putative		265.737	131.616	2.01904		#N/A	#N/A	#N/A	#N/A	#N/A	#N/A	#N/A	AFUA_2G02530	#N/A	#N/A	#N/A	#N/A	#N/A	#N/A
AFUA_2G12170	conserved hypothetical protein		19.3389	9.63778	2.00657		Uncharacterized protein	GO:0005575	cellular_component	CC	ND	3.3105e-7	9.3467e-05	AFUA_2G12170	#N/A	#N/A	#N/A	#N/A	#N/A	#N/A
AFUA_2G14930	alanine racemase		17.9726	8.95685	2.00657		#N/A	#N/A	#N/A	#N/A	#N/A	#N/A	#N/A	AFUA_2G14930	Alanine racemase (EC 4.1.2.-)	01.20.19	metabolism of secondary products derived from glycine, L-serine and L-alanine	Metabolism	0.013034	0.25186
AFUA_1G07030	conserved hypothetical protein		34.81	17.348	2.00657		Uncharacterized protein	GO:0005575	cellular_component	CC	ND	3.3105e-7	9.3467e-05	AFUA_1G07030	Uncharacterized protein	01.20.37.01	metabolism of thioredoxin, glutaredoxin, glutathion	Metabolism	0.034876	0.41473
AFUA_2G03000	nucleoside transporter, putative		12.5979	6.27832	2.00657		#N/A	#N/A	#N/A	#N/A	#N/A	#N/A	#N/A	AFUA_2G03000	#N/A	#N/A	#N/A	#N/A	#N/A	#N/A
AFUA_4G09170	anion exchange family protein		32.9597	16.4258	2.00657		#N/A	#N/A	#N/A	#N/A	#N/A	#N/A	#N/A	AFUA_4G09170	Anion exchange family protein	20.03.02.03	antiporter	Cellular transport, transport facilitation and transport routes	0.0084949	0.22383
AFUA_6G12240	glycerophosphoryl diester phosphodiesterase family protein		15.4892	7.71925	2.00657		Glycerophosphoryl diester phosphodiesterase family protein (EC 3.1.4.46)	GO:0005575	cellular_component	CC	ND	3.3105e-7	9.3467e-05	AFUA_6G12240	#N/A	#N/A	#N/A	#N/A	#N/A	#N/A
AFUA_6G08780	proline utilization protein PrnX, putative		18.5263	9.23283	2.00657		Proline utilization protein PrnX, putative (EC 4.3.1.12)	GO:0005575	cellular_component	CC	ND	3.3105e-7	9.3467e-05	AFUA_6G08780	Proline utilization protein PrnX, putative (EC 4.3.1.12)	01.01.03.05	metabolism of arginine	Metabolism	0.036365	0.41473
AFUA_8G05220	acetamidase, putative		13.2014	6.57908	2.00657		Acetamidase, putative (EC 6.3.5.-)	GO:0005575	cellular_component	CC	ND	3.3105e-7	9.3467e-05	AFUA_8G05220	Acetamidase, putative (EC 6.3.5.-)	1.06	lipid, fatty acid and isoprenoid metabolism	Metabolism	4.5362e-06	0.0010864
AFUA_1G07230	DSBA-like thioredoxin domain protein		27.6732	13.7913	2.00657		DSBA-like thioredoxin domain protein	GO:0055114	oxidation-reduction process	BP	IEA	7.8355e-8	6.6367e-05	AFUA_1G07230	DSBA-like thioredoxin domain protein	1.2	secondary metabolism	Metabolism	0.0024405	0.078984
AFUA_2G04020	alpha,alpha-trehalose phosphate synthase subunit, putative		14.3937	7.17328	2.00657		Alpha,alpha-trehalose phosphate synthase subunit, putative (EC 2.4.1.15)	GO:0005575	cellular_component	CC	ND	3.3105e-7	9.3467e-05	AFUA_2G04020	Alpha,alpha-trehalose phosphate synthase subunit, putative (EC 2.4.1.15)	1.05	C-compound and carbohydrate metabolism	Metabolism	2.515e-06	0.0010864
AFUA_6G14360	cytochrome P450 monooxygenase, putative		15.9756	7.96164	2.00657		Cytochrome P450 monooxygenase, putative (EC 1.14.-.-)	GO:0055114	oxidation-reduction process	BP	IEA	7.8355e-8	6.6367e-05	AFUA_6G14360	Cytochrome P450 monooxygenase, putative (EC 1.14.-.-)	1.05	C-compound and carbohydrate metabolism	Metabolism	2.515e-06	0.0010864
AFUA_1G14460	fungal specific transcription factor, putative		9.93079	4.94913	2.00657		#N/A	#N/A	#N/A	#N/A	#N/A	#N/A	#N/A	AFUA_1G14460	#N/A	#N/A	#N/A	#N/A	#N/A	#N/A
AFUA_7G04730	siderochrome-iron transporter, putative		10.8781	5.42125	2.00657		Siderochrome-iron transporter, putative	GO:0005575	cellular_component	CC	ND	3.3105e-7	9.3467e-05	AFUA_7G04730	Siderochrome-iron transporter, putative	34.01.01.01	homeostasis of metal ions (Na, K, Ca etc.)	Interaction with the environment	0.0011954	0.067524
AFUA_1G09110	Patatin-like serine hydrolase, putative		11.21	5.58664	2.00657		Patatin-like serine hydrolase, putative	GO:0005575	cellular_component	CC	ND	3.3105e-7	9.3467e-05	AFUA_1G09110	Patatin-like serine hydrolase, putative	1.06	lipid, fatty acid and isoprenoid metabolism	Metabolism	4.5362e-06	0.0010864
AFUA_1G10030	hypothetical protein		13.6651	6.81017	2.00657		Uncharacterized protein	GO:0005575	cellular_component	CC	ND	3.3105e-7	9.3467e-05	AFUA_1G10030	#N/A	#N/A	#N/A	#N/A	#N/A	#N/A
AFUA_3G12970	DUF580 domain protein Pns1, putative		36.8805	18.3799	2.00657		#N/A	#N/A	#N/A	#N/A	#N/A	#N/A	#N/A	AFUA_3G12970	#N/A	#N/A	#N/A	#N/A	#N/A	#N/A
AFUA_3G08810	translation repressor/antiviral protein Ski3, putative		55.5013	27.6597	2.00657		#N/A	#N/A	#N/A	#N/A	#N/A	#N/A	#N/A	AFUA_3G08810	#N/A	#N/A	#N/A	#N/A	#N/A	#N/A
AFUA_2G07770	Ras small monomeric GTPase RasB		55.1159	27.4677	2.00657		#N/A	#N/A	#N/A	#N/A	#N/A	#N/A	#N/A	AFUA_2G07770	Ras small monomeric GTPase RasB	43.01.03.09	development of asco- basidio- or zygospore	Cell type differentiation	0.035951	0.41473
AFUA_2G08350	MFS allantoate transporter, putative		13.1228	6.53992	2.00657		#N/A	#N/A	#N/A	#N/A	#N/A	#N/A	#N/A	AFUA_2G08350	#N/A	#N/A	#N/A	#N/A	#N/A	#N/A
AFUA_3G00870	GNAT family N-acetyltransferase, putative		41.8602	20.8615	2.00657		GNAT family N-acetyltransferase, putative	GO:0005575	cellular_component	CC	ND	3.3105e-7	9.3467e-05	AFUA_3G00870	#N/A	#N/A	#N/A	#N/A	#N/A	#N/A
AFUA_5G02870	oxidoreductase, short-chain dehydrogenase/reductase family		51.2706	25.5513	2.00657		Oxidoreductase, short-chain dehydrogenase/reductase family (EC 1.1.-.-)	GO:0055114	oxidation-reduction process	BP	IEA	7.8355e-8	6.6367e-05	AFUA_5G02870	Oxidoreductase, short-chain dehydrogenase/reductase family (EC 1.1.-.-)	1.05	C-compound and carbohydrate metabolism	Metabolism	2.515e-06	0.0010864
AFUA_1G09570	conserved hypothetical protein		20.572	10.2523	2.00657		Uncharacterized protein	GO:0005575	cellular_component	CC	ND	3.3105e-7	9.3467e-05	AFUA_1G09570	#N/A	#N/A	#N/A	#N/A	#N/A	#N/A
AFUA_7G02040	triacylglycerol lipase, putative		56.8531	28.3334	2.00657		Triacylglycerol lipase, putative (EC 3.1.1.3)	GO:0008152	metabolic process	BP	IEA	0.0026803	0.41559	AFUA_7G02040	Triacylglycerol lipase, putative (EC 3.1.1.3)	1.06	lipid, fatty acid and isoprenoid metabolism	Metabolism	4.5362e-06	0.0010864
AFUA_5G01510	amino acid permease, putative		69.9884	34.8796	2.00657		#N/A	#N/A	#N/A	#N/A	#N/A	#N/A	#N/A	AFUA_5G01510	#N/A	#N/A	#N/A	#N/A	#N/A	#N/A
AFUA_6G02242	serine/threonine-protein kinase, putative		14.8294	7.3904	2.00657		Serine/threonine-protein kinase, putative (EC 2.7.1.-)	GO:0005575	cellular_component	CC	ND	3.3105e-7	9.3467e-05	AFUA_6G02242	#N/A	#N/A	#N/A	#N/A	#N/A	#N/A
AFUA_7G04550	serine/threonine protein kinase, putative		33.9175	16.9032	2.00657		Serine/threonine protein kinase, putative (EC 2.7.1.-)	GO:0005575	cellular_component	CC	ND	3.3105e-7	9.3467e-05	AFUA_7G04550	#N/A	#N/A	#N/A	#N/A	#N/A	#N/A
AFUA_4G08410	mannose-6-phosphate isomerase, class I		16.3306	8.13857	2.00657		Mannose-6-phosphate isomerase, class I (EC 5.3.1.8)	GO:0005575	cellular_component	CC	ND	3.3105e-7	9.3467e-05	AFUA_4G08410	Mannose-6-phosphate isomerase, class I (EC 5.3.1.8)	1.05	C-compound and carbohydrate metabolism	Metabolism	2.515e-06	0.0010864
AFUA_2G13830	conserved hypothetical protein		4.42994	2.20772	2.00657		Uncharacterized protein	GO:0005575	cellular_component	CC	ND	3.3105e-7	9.3467e-05	AFUA_2G13830	#N/A	#N/A	#N/A	#N/A	#N/A	#N/A
AFUA_2G14720	CCAAT-binding transcription factor subunit HAPB		53.7716	26.7977	2.00657		#N/A	#N/A	#N/A	#N/A	#N/A	#N/A	#N/A	AFUA_2G14720	#N/A	#N/A	#N/A	#N/A	#N/A	#N/A
AFUA_2G10050	hypothetical protein		20.2881	10.1108	2.00657		Uncharacterized protein	GO:0005575	cellular_component	CC	ND	3.3105e-7	9.3467e-05	AFUA_2G10050	#N/A	#N/A	#N/A	#N/A	#N/A	#N/A
AFUA_2G00670	protein kinase, putative		18.0708	9.00579	2.00657		Protein kinase, putative	GO:0005575	cellular_component	CC	ND	3.3105e-7	9.3467e-05	AFUA_2G00670	#N/A	#N/A	#N/A	#N/A	#N/A	#N/A
AFUA_2G15140	MFS drug transporter, putative		11.8105	5.88593	2.00657		#N/A	#N/A	#N/A	#N/A	#N/A	#N/A	#N/A	AFUA_2G15140	MFS drug transporter, putative	20.09.16	cellular export and secretion	Cellular transport, transport facilitation and transport routes	0.00089546	0.066362
AFUA_3G02900	oxidoreductase, short chain dehydrogenase/reductase family		22.42	11.1733	2.00657		Oxidoreductase, short chain dehydrogenase/reductase family	GO:0055114	oxidation-reduction process	BP	IEA	7.8355e-8	6.6367e-05	AFUA_3G02900	Oxidoreductase, short chain dehydrogenase/reductase family	1.05	C-compound and carbohydrate metabolism	Metabolism	2.515e-06	0.0010864
AFUA_3G09530	cytochrome P450, putative		11.8317	5.89646	2.00657		Cytochrome P450, putative	GO:0055114	oxidation-reduction process	BP	IEA	7.8355e-8	6.6367e-05	AFUA_3G09530	Cytochrome P450, putative	32.07	detoxification	Cell rescue, defense and virulence	8.7992e-06	0.0014049
AFUA_3G11540	FHA domain protein SNIP1, putative		60.3092	30.0558	2.00657		FHA domain protein SNIP1, putative	GO:0005575	cellular_component	CC	ND	3.3105e-7	9.3467e-05	AFUA_3G11540	#N/A	#N/A	#N/A	#N/A	#N/A	#N/A
AFUA_3G14030	extracellular phytase, putative		20.226	10.0799	2.00657		Extracellular phytase, putative (EC 3.1.3.1)	GO:0005575	cellular_component	CC	ND	3.3105e-7	9.3467e-05	AFUA_3G14030	Extracellular phytase, putative (EC 3.1.3.1)	1.05	C-compound and carbohydrate metabolism	Metabolism	2.515e-06	0.0010864
AFUA_4G07720	carboxylesterase, putative		11.8105	5.88593	2.00657		Carboxylesterase, putative (EC 3.1.1.-)	GO:0008152	metabolic process	BP	IEA	0.0026803	0.41559	AFUA_4G07720	Carboxylesterase, putative (EC 3.1.1.-)	1.05	C-compound and carbohydrate metabolism	Metabolism	2.515e-06	0.0010864
AFUA_4G09940	polysaccharide deacetylase family protein		25.9369	12.926	2.00657		Polysaccharide deacetylase family protein	GO:0005575	cellular_component	CC	ND	3.3105e-7	9.3467e-05	AFUA_4G09940	Polysaccharide deacetylase family protein	01.05.03	polysaccharide metabolism	Metabolism	0.012778	0.25186
AFUA_6G02400	MFS drug efflux pump, putative		11.0232	5.49353	2.00657		MFS drug efflux pump, putative	GO:0005575	cellular_component	CC	ND	3.3105e-7	9.3467e-05	AFUA_6G02400	MFS drug efflux pump, putative	20.09.16	cellular export and secretion	Cellular transport, transport facilitation and transport routes	0.00089546	0.066362
AFUA_6G05000	Glycosyl hydrolases family 32 superfamily		21.0299	10.4805	2.00657		Glycosyl hydrolases family 32 superfamily (EC 3.2.1.26)	GO:0008152	metabolic process	BP	IEA	0.0026803	0.41559	AFUA_6G05000	Glycosyl hydrolases family 32 superfamily (EC 3.2.1.26)	1.05	C-compound and carbohydrate metabolism	Metabolism	2.515e-06	0.0010864
AFUA_7G00400	hypothetical protein		26.9955	13.4536	2.00657		Uncharacterized protein	GO:0005575	cellular_component	CC	ND	3.3105e-7	9.3467e-05	AFUA_7G00400	#N/A	#N/A	#N/A	#N/A	#N/A	#N/A
AFUA_7G04380	alcohol dehydrogenase, putative		18.0215	8.98125	2.00657		Alcohol dehydrogenase, putative (EC 1.1.1.1)	GO:0055114	oxidation-reduction process	BP	IEA	7.8355e-8	6.6367e-05	AFUA_7G04380	Alcohol dehydrogenase, putative (EC 1.1.1.1)	1.05	C-compound and carbohydrate metabolism	Metabolism	2.515e-06	0.0010864
AFUA_5G12420	decapping enzyme Dcp2, putative		132.016	65.9732	2.00106		Decapping enzyme Dcp2, putative	GO:0005575	cellular_component	CC	ND	3.3105e-7	9.3467e-05	AFUA_5G12420	#N/A	#N/A	#N/A	#N/A	#N/A	#N/A

## Sheet: TableS2B
41362 4h up		Expression value				GO analysis							41362 4h up	FunCat
Feature ID	Product	Free	Virus	Fold change	列1	Protein name	GO ID	GO name	GO namespace	Evidence code	Exact p-value	Adjusted p-value	Feature ID	Protein name2	FunCat ID	FunCat description	FunCat main category	Exact p-value2	Adjusted p-value3
AFUA_1G07140	c-24(28) sterol reductase	1.65	49.94	30.23		C-24(28) sterol reductase	GO:0016020	membrane	CC	IEA	0.034267	0.30346	AFUA_1G07140	C-24(28) sterol reductase	16.01	protein binding	Protein with binding function or cofactor requirement (structural or analytic)	3.3908e-18	4.442e-16
AFUA_5G05740	Golgi GDP-mannose transporter	2.47	71.72	29.07		GDP-mannose transporter (GMT)	GO:0006810	transport	BP	IEA	0.022991	0.29509	AFUA_5G05740	GDP-mannose transporter (GMT)	1.03	nucleotide/nucleoside/nucleobase metabolism	Metabolism	0.0015939	0.033408
AFUA_5G08080	conserved hypothetical protein	4.33	70.56	16.28		#N/A	#N/A	#N/A	#N/A	#N/A	#N/A	#N/A	AFUA_5G08080	#N/A	#N/A	#N/A	#N/A	#N/A	#N/A
AFUA_3G11510	O-acetyltransferase, putative	4.13	67.17	16.28		O-acetyltransferase, putative (EC 2.3.1.-)	GO:0016740	transferase activity	MF	IEA	1.5877e-06	9.5178e-05	AFUA_3G11510	#N/A	#N/A	#N/A	#N/A	#N/A	#N/A
AFUA_3G06255	conserved hypothetical protein	10.86	164.17	15.12		#N/A	#N/A	#N/A	#N/A	#N/A	#N/A	#N/A	AFUA_3G06255	#N/A	#N/A	#N/A	#N/A	#N/A	#N/A
AFUA_6G04300	conserved hypothetical protein	10.33	156.1	15.12		#N/A	#N/A	#N/A	#N/A	#N/A	#N/A	#N/A	AFUA_6G04300	#N/A	#N/A	#N/A	#N/A	#N/A	#N/A
AFUA_1G15400	peroxisome biosynthesis protein (Peroxine-7), putative	2.65	40.01	15.12		Peroxisome biosynthesis protein (Peroxine-7), putative	GO:0005053	peroxisome matrix targeting signal-2 binding	MF	ISO	0.032903	0.29509	AFUA_1G15400	Peroxisome biosynthesis protein (Peroxine-7), putative	16.01	protein binding	Protein with binding function or cofactor requirement (structural or analytic)	3.3908e-18	4.442e-16
AFUA_2G01460	ZIP Zinc transporter, putaitve	2.94	44.5	15.12		ZIP Zinc transporter, putaitve	GO:0016020	membrane	CC	IEA	0.034267	0.30346	AFUA_2G01460	ZIP Zinc transporter, putaitve	18.02.01.02	enzyme inhibitor	Regulation of metabolism and protein function	0.052395	0.36607
AFUA_4G12890	conserved hypothetical protein	1.98	27.58	13.95		Uncharacterized protein	GO:0007017	microtubule-based process	BP	IEA	0.040739	0.34563	AFUA_4G12890	#N/A	#N/A	#N/A	#N/A	#N/A	#N/A
AFUA_4G13910	conserved hypothetical protein	1.8	22.98	12.79		Uncharacterized protein	GO:0046872	metal ion binding	MF	IEA	0.18261	0.39467	AFUA_4G13910	#N/A	#N/A	#N/A	#N/A	#N/A	#N/A
AFUA_1G04570	DNA repair protein, putative	1.24	15.88	12.79		#N/A	#N/A	#N/A	#N/A	#N/A	#N/A	#N/A	AFUA_1G04570	DNA repair protein, putative	01.03.16	polynucleotide degradation	Metabolism	0.027233	0.25035
AFUA_1G09580	conserved hypothetical protein	5.89	71.88	12.21		#N/A	#N/A	#N/A	#N/A	#N/A	#N/A	#N/A	AFUA_1G09580	#N/A	#N/A	#N/A	#N/A	#N/A	#N/A
AFUA_1G01590	C6 transcription factor, putative	1.13	13.1	11.63		C6 transcription factor, putative	GO:0005634	nucleus	CC	IEA	0.0001011	0.0047979	AFUA_1G01590	#N/A	#N/A	#N/A	#N/A	#N/A	#N/A
AFUA_7G02030	cytochrome c oxidase assembly protein (Pet117), putative	11.38	132.37	11.63		#N/A	#N/A	#N/A	#N/A	#N/A	#N/A	#N/A	AFUA_7G02030	Cytochrome c oxidase assembly protein (Pet117), putative	14.1	assembly of protein complexes	Protein fate (folding, modification, destination)	0.020009	0.21397
AFUA_6G04240	PAP2 domain protein	4.39	51.1	11.63		PAP2 domain protein (EC 3.-.-.-)	GO:0016020	membrane	CC	IEA	0.034267	0.30346	AFUA_6G04240	PAP2 domain protein (EC 3.-.-.-)	14.07.02.02	N-directed glycosylation, deglycosylation	Protein fate (folding, modification, destination)	0.012538	0.15659
AFUA_5G11880	PP-loop family protein	1.33	15.47	11.63		PP-loop family protein	GO:0005737	cytoplasm	CC	IEA	1.6768e-15	3.8197e-13	AFUA_5G11880	#N/A	#N/A	#N/A	#N/A	#N/A	#N/A
AFUA_2G12050	ZIP metal ion transporter, putative	4.85	56.34	11.63		ZIP metal ion transporter, putative	GO:0016020	membrane	CC	IEA	0.034267	0.30346	AFUA_2G12050	#N/A	#N/A	#N/A	#N/A	#N/A	#N/A
AFUA_6G03060	MFS monosaccharide transporter, putative	3.55	39.24	11.05		MFS monosaccharide transporter, putative	GO:0006810	transport	BP	IEA	0.022991	0.29509	AFUA_6G03060	#N/A	#N/A	#N/A	#N/A	#N/A	#N/A
AFUA_3G07180	pantothenate kinase, putative	4.13	45.68	11.05		Pantothenate kinase, putative (EC 2.7.1.33)	GO:0016740	transferase activity	MF	IEA	1.5877e-06	9.5178e-05	AFUA_3G07180	Pantothenate kinase, putative (EC 2.7.1.33)	16.19	nucleotide/nucleoside/nucleobase binding	Protein with binding function or cofactor requirement (structural or analytic)	0.0315	0.27059
AFUA_1G02920	conserved hypothetical protein	1.25	13.13	10.47		#N/A	#N/A	#N/A	#N/A	#N/A	#N/A	#N/A	AFUA_1G02920	#N/A	#N/A	#N/A	#N/A	#N/A	#N/A
AFUA_4G03870	ELL complex subunit Eap30, putative	3.62	37.89	10.47		#N/A	#N/A	#N/A	#N/A	#N/A	#N/A	#N/A	AFUA_4G03870	ELL complex subunit Eap30, putative	16.01	protein binding	Protein with binding function or cofactor requirement (structural or analytic)	3.3908e-18	4.442e-16
AFUA_3G09140	endo 1,5-alpha-arabinase	2.27	23.77	10.47		#N/A	#N/A	#N/A	#N/A	#N/A	#N/A	#N/A	AFUA_3G09140	#N/A	#N/A	#N/A	#N/A	#N/A	#N/A
AFUA_1G07110	export control protein CHS7-like, putative	3.16	33.07	10.47		#N/A	#N/A	#N/A	#N/A	#N/A	#N/A	#N/A	AFUA_1G07110	Export control protein CHS7-like, putative	20.09.07.03	ER to Golgi transport	Cellular transport, transport facilitation and transport routes	0.0014311	0.032604
AFUA_4G06290	longevity-assurance protein (LAC1), putative	4.04	42.26	10.47		Longevity-assurance protein (LAC1), putative	GO:0016020	membrane	CC	IEA	0.034267	0.30346	AFUA_4G06290	Longevity-assurance protein (LAC1), putative	14.04	protein targeting, sorting and translocation	Protein fate (folding, modification, destination)	6.752e-8	5.0543e-06
AFUA_7G01370	thiosulfate sulfurtransferase, putative	2.79	29.17	10.47		Thiosulfate sulfurtransferase, putative (EC 2.8.1.1)	GO:0016740	transferase activity	MF	IEA	1.5877e-06	9.5178e-05	AFUA_7G01370	#N/A	#N/A	#N/A	#N/A	#N/A	#N/A
AFUA_4G04030	histidinol-phosphatase	6.12	60.45	9.88		Histidinol-phosphatase	GO:0000105	histidine biosynthetic process	BP	IEA	0.0067277	0.12359	AFUA_4G04030	Histidinol-phosphatase	01.01.09.07.01	biosynthesis of histidine	Metabolism	0.0043713	0.067369
AFUA_1G13150	Smr domain protein	10.5	103.77	9.88		#N/A	#N/A	#N/A	#N/A	#N/A	#N/A	#N/A	AFUA_1G13150	#N/A	#N/A	#N/A	#N/A	#N/A	#N/A
AFUA_2G15080	Sybindin-like family protein	10.74	106.13	9.88		Sybindin-like family protein	GO:0006810	transport	BP	IEA	0.022991	0.29509	AFUA_2G15080	Sybindin-like family protein	16.01	protein binding	Protein with binding function or cofactor requirement (structural or analytic)	3.3908e-18	4.442e-16
AFUA_3G08160	eukaryotic translation initiation factor 4, putative	146.25	1444.25	9.87		ATP-dependent RNA helicase eIF4A (EC 3.6.4.13) (Eukaryotic initiation factor 4A) (eIF-4A) (Translation initiation factor 1)	GO:0006412	translation	BP	IEA	1.2444e-41	1.4174e-38	AFUA_3G08160	ATP-dependent RNA helicase eIF4A (EC 3.6.4.13) (Eukaryotic initiation factor 4A) (eIF-4A) (Translation initiation factor 1)	12.04	translation	Protein synthesis	3.1078e-24	8.1425e-22
AFUA_7G04795	conserved hypothetical protein	1.07	10	9.3		#N/A	#N/A	#N/A	#N/A	#N/A	#N/A	#N/A	AFUA_7G04795	#N/A	#N/A	#N/A	#N/A	#N/A	#N/A
AFUA_1G05700	splicing factor 3B subunit 10 (SF3b10), putative	10.4983	97.6628	9.30276		#N/A	#N/A	#N/A	#N/A	#N/A	#N/A	#N/A	AFUA_1G05700	Splicing factor 3B subunit 10 (SF3b10), putative	16.01	protein binding	Protein with binding function or cofactor requirement (structural or analytic)	3.3908e-18	4.442e-16
AFUA_5G03970	hypothetical protein	2.04955	19.0665	9.30276		#N/A	#N/A	#N/A	#N/A	#N/A	#N/A	#N/A	AFUA_5G03970	#N/A	#N/A	#N/A	#N/A	#N/A	#N/A
AFUA_5G05670	transporter, putative	2.21794	20.633	9.30276		Transporter, putative	GO:0016020	membrane	CC	IEA	0.034267	0.30346	AFUA_5G05670	#N/A	#N/A	#N/A	#N/A	#N/A	#N/A
AFUA_2G16090	karyopherin alpha subunit, putative	11.96	109.275	9.13664		Importin subunit alpha	GO:0005737	cytoplasm	CC	IEA	1.6768e-15	3.8197e-13	AFUA_2G16090	Importin subunit alpha	16.01	protein binding	Protein with binding function or cofactor requirement (structural or analytic)	3.3908e-18	4.442e-16
AFUA_1G04790	general stress response phosphoprotein phosphatase Psr1/2, putative	4.90403	43.7202	8.91514		General stress response phosphoprotein phosphatase Psr1/2, putative	GO:0016311	dephosphorylation	BP	IEA	0.10571	0.39346	AFUA_1G04790	#N/A	#N/A	#N/A	#N/A	#N/A	#N/A
AFUA_3G08500	morphogenesis protein (Msb1), putative	1.84001	16.0473	8.72134		#N/A	#N/A	#N/A	#N/A	#N/A	#N/A	#N/A	AFUA_3G08500	Morphogenesis protein (Msb1), putative	43.01.03.05	budding, cell polarity and filament formation	Cell type differentiation	0.0082809	0.10848
AFUA_1G12000	nuclear and cytoplasmic polyadenylated RNA-binding protein pub1	3.85651	33.6339	8.72134		Nuclear and cytoplasmic polyadenylated RNA-binding protein pub1	GO:0003676	nucleic acid binding	MF	IEA	5.9209e-10	8.4299e-8	AFUA_1G12000	Nuclear and cytoplasmic polyadenylated RNA-binding protein pub1	16.03.03	RNA binding	Protein with binding function or cofactor requirement (structural or analytic)	3.4798e-11	3.6468e-9
AFUA_1G11790	nucleoside hydrolase, putative	3.61317	31.5117	8.72134		#N/A	#N/A	#N/A	#N/A	#N/A	#N/A	#N/A	AFUA_1G11790	#N/A	#N/A	#N/A	#N/A	#N/A	#N/A
AFUA_6G14250	endosomal integral membrane protein (P24a), putative	2.91618	25.433	8.72134		#N/A	#N/A	#N/A	#N/A	#N/A	#N/A	#N/A	AFUA_6G14250	Endosomal integral membrane protein (P24a), putative	20.09.07	vesicular transport (Golgi network, etc.)	Cellular transport, transport facilitation and transport routes	0.023893	0.23758
AFUA_8G05710	MFS sugar transporter Stl1, putative	12.1803	105.217	8.63828		MFS sugar transporter Stl1, putative	GO:0006810	transport	BP	IEA	0.022991	0.29509	AFUA_8G05710	#N/A	#N/A	#N/A	#N/A	#N/A	#N/A
AFUA_2G01450	alpha-1,6 mannosyltransferase subunit (Mnn9), putative	9.49592	80.0565	8.43062		Alpha-1,6 mannosyltransferase subunit (Mnn9), putative	GO:0016740	transferase activity	MF	IEA	1.5877e-06	9.5178e-05	AFUA_2G01450	Alpha-1,6 mannosyltransferase subunit (Mnn9), putative	20.09.16.02	Type II protein secretion system (general secretory pathway, exocytosis)	Cellular transport, transport facilitation and transport routes	0.0020382	0.041077
AFUA_6G07360	40S ribosomal protein S8	27.627	231.307	8.37248		40S ribosomal protein S8	GO:0006412	translation	BP	IEA	1.2444e-41	1.4174e-38	AFUA_6G07360	40S ribosomal protein S8	12.01.01	ribosomal proteins	Protein synthesis	4.0609e-34	2.1279e-31
AFUA_6G10660	ATP citrate lyase subunit (Acl), putatibe	89.246	742.247	8.31687		ATP citrate lyase subunit (Acl), putatibe (EC 6.2.1.5)	GO:0016874	ligase activity	MF	IEA	0.00041283	0.015674	AFUA_6G10660	#N/A	#N/A	#N/A	#N/A	#N/A	#N/A
AFUA_6G11380	mitochondrial import receptor subunit (Tom20), putative	44.4632	368.39	8.28527		Mitochondrial import receptor subunit (Tom20), putative	GO:0006886	intracellular protein transport	BP	IEA	3.641e-05	0.0018851	AFUA_6G11380	Mitochondrial import receptor subunit (Tom20), putative	14.04	protein targeting, sorting and translocation	Protein fate (folding, modification, destination)	6.752e-8	5.0543e-06
AFUA_6G06940	glycosyltransferase family protein	4.12596	33.5849	8.13991		UDP-N-acetylglucosamine transferase subunit alg14 (Asparagine-linked glycosylation protein 14)	GO:0016020	membrane	CC	IEA	0.034267	0.30346	AFUA_6G06940	#N/A	#N/A	#N/A	#N/A	#N/A	#N/A
AFUA_5G01620	extracellular proline-rich protein	3.33867	27.1765	8.13991		#N/A	#N/A	#N/A	#N/A	#N/A	#N/A	#N/A	AFUA_5G01620	#N/A	#N/A	#N/A	#N/A	#N/A	#N/A
AFUA_3G11090	Golgi complex component Cog3, putative	3.74443	30.4793	8.13991		Golgi complex component Cog3, putative	GO:0006886	intracellular protein transport	BP	IEA	3.641e-05	0.0018851	AFUA_3G11090	Golgi complex component Cog3, putative	14.04	protein targeting, sorting and translocation	Protein fate (folding, modification, destination)	6.752e-8	5.0543e-06
AFUA_6G07610	conserved hypothetical protein	2.97121	24.1854	8.13991		#N/A	#N/A	#N/A	#N/A	#N/A	#N/A	#N/A	AFUA_6G07610	#N/A	#N/A	#N/A	#N/A	#N/A	#N/A
AFUA_4G03630	sterol 24-c-methyltransferase, putative	14.9975	122.079	8.13991		Sterol 24-c-methyltransferase, putative (EC 2.1.1.41)	GO:0016740	transferase activity	MF	IEA	1.5877e-06	9.5178e-05	AFUA_4G03630	#N/A	#N/A	#N/A	#N/A	#N/A	#N/A
AFUA_1G06880	mitochondrial export translocase Oxa2, putative	2.75465	22.4226	8.13991		Mitochondrial export translocase Oxa2, putative	GO:0051205	protein insertion into membrane	BP	IEA	0.032903	0.29509	AFUA_1G06880	#N/A	#N/A	#N/A	#N/A	#N/A	#N/A
AFUA_1G13380	hydantoin racemase (Dcg1), putative	3.64805	29.6948	8.13991		Hydantoin racemase (Dcg1), putative (EC 5.1.99.-)	GO:0006807	nitrogen compound metabolic process	BP	IEA	0.10771	0.39346	AFUA_1G13380	#N/A	#N/A	#N/A	#N/A	#N/A	#N/A
AFUA_1G16320	vacuolar protein sorting-associated protein Vps28, putative	3.85651	31.3916	8.13991		#N/A	#N/A	#N/A	#N/A	#N/A	#N/A	#N/A	AFUA_1G16320	Vacuolar protein sorting-associated protein Vps28, putative	16.01	protein binding	Protein with binding function or cofactor requirement (structural or analytic)	3.3908e-18	4.442e-16
AFUA_2G11580	MFS multidrug transporter, putative	1.55402	12.6496	8.13991		#N/A	#N/A	#N/A	#N/A	#N/A	#N/A	#N/A	AFUA_2G11580	#N/A	#N/A	#N/A	#N/A	#N/A	#N/A
AFUA_2G15915	glycosyltransferase family protein	2.73868	22.2926	8.13991		Glycosyltransferase family protein	GO:0016740	transferase activity	MF	IEA	1.5877e-06	9.5178e-05	AFUA_2G15915	#N/A	#N/A	#N/A	#N/A	#N/A	#N/A
AFUA_5G06410	C2H2 transcription factor (AmdA), putative	2.15226	17.5192	8.13991		C2H2 transcription factor (AmdA), putative	GO:0003676	nucleic acid binding	MF	IEA	5.9209e-10	8.4299e-8	AFUA_5G06410	C2H2 transcription factor (AmdA), putative	16.03.01	DNA binding	Protein with binding function or cofactor requirement (structural or analytic)	0.0014039	0.032604
AFUA_5G08560	vacuolar ATPase proteolipid subunit c, putative	12.0362	97.9738	8.13991		Vacuolar ATPase proteolipid subunit c, putative	GO:0006810	transport	BP	IEA	0.022991	0.29509	AFUA_5G08560	Vacuolar ATPase proteolipid subunit c, putative	16.01	protein binding	Protein with binding function or cofactor requirement (structural or analytic)	3.3908e-18	4.442e-16
AFUA_4G07200	conserved hypothetical protein	2.41648	19.6699	8.13991		#N/A	#N/A	#N/A	#N/A	#N/A	#N/A	#N/A	AFUA_4G07200	#N/A	#N/A	#N/A	#N/A	#N/A	#N/A
AFUA_5G07260	COP9 signalosome subunit 6 (CsnF), putative	4.72422	38.4547	8.13991		#N/A	#N/A	#N/A	#N/A	#N/A	#N/A	#N/A	AFUA_5G07260	COP9 signalosome subunit 6 (CsnF), putative	16.01	protein binding	Protein with binding function or cofactor requirement (structural or analytic)	3.3908e-18	4.442e-16
AFUA_1G15790	CDP-diacylglycerol-inositol 3-phosphatidyltransferase PIS	3.6908	30.0428	8.13991		CDP-diacylglycerol-inositol 3-phosphatidyltransferase PIS	GO:0016740	transferase activity	MF	IEA	1.5877e-06	9.5178e-05	AFUA_1G15790	#N/A	#N/A	#N/A	#N/A	#N/A	#N/A
AFUA_2G09680	PB1 domain protein, putative	1.67525	13.6364	8.13991		#N/A	#N/A	#N/A	#N/A	#N/A	#N/A	#N/A	AFUA_2G09680	PB1 domain protein, putative (EC 1.-.-.-)	16.01	protein binding	Protein with binding function or cofactor requirement (structural or analytic)	3.3908e-18	4.442e-16
AFUA_1G09380	conserved hypothetical protein	4.6544	37.8864	8.13991		#N/A	#N/A	#N/A	#N/A	#N/A	#N/A	#N/A	AFUA_1G09380	#N/A	#N/A	#N/A	#N/A	#N/A	#N/A
AFUA_1G13520	SET domain protein	1.92433	15.6638	8.13991		#N/A	#N/A	#N/A	#N/A	#N/A	#N/A	#N/A	AFUA_1G13520	#N/A	#N/A	#N/A	#N/A	#N/A	#N/A
AFUA_6G00620	GPI anchored hypothetical protein	4.10802	33.4389	8.13991		#N/A	#N/A	#N/A	#N/A	#N/A	#N/A	#N/A	AFUA_6G00620	#N/A	#N/A	#N/A	#N/A	#N/A	#N/A
AFUA_6G10560	DNA polymerase delta subunit 4, putative	4.87033	39.6441	8.13991		DNA polymerase delta subunit 4, putative	GO:0005634	nucleus	CC	IEA	0.0001011	0.0047979	AFUA_6G10560	#N/A	#N/A	#N/A	#N/A	#N/A	#N/A
AFUA_2G16400	translation initiation factor 4B	22.9053	184.228	8.04301		Translation initiation factor 4B	GO:0003676	nucleic acid binding	MF	IEA	5.9209e-10	8.4299e-8	AFUA_2G16400	Translation initiation factor 4B	12.04.01	translation initiation	Protein synthesis	3.6183e-05	0.0017236
AFUA_2G11260	3-isopropylmalate dehydratase, putative	25.5035	201.947	7.91842		3-isopropylmalate dehydratase (EC 4.2.1.33) (Alpha-IPM isomerase) (Isopropylmalate isomerase)	GO:0008652	cellular amino acid biosynthetic process	BP	IEA	1.1386e-7	9.2636e-06	AFUA_2G11260	#N/A	#N/A	#N/A	#N/A	#N/A	#N/A
AFUA_1G07080	tRNA-specific adenosine-34 deaminase subunit Tad3, putative	13.0452	99.6854	7.64155		tRNA-specific adenosine-34 deaminase subunit Tad3, putative (EC 3.5.4.-)	GO:0003824	catalytic activity	MF	IEA	0.13802	0.39346	AFUA_1G07080	#N/A	#N/A	#N/A	#N/A	#N/A	#N/A
AFUA_2G05100	conserved hypothetical protein	14.2082	107.392	7.55849		Uncharacterized protein	GO:0003676	nucleic acid binding	MF	IEA	5.9209e-10	8.4299e-8	AFUA_2G05100	Uncharacterized protein	01.05.13	transfer of activated C-1 groups	Metabolism	0.051636	0.36564
AFUA_1G03420	adenylate kinase 2	7.61971	57.5935	7.55849		GTP:AMP phosphotransferase, mitochondrial (EC 2.7.4.10) (Adenylate kinase 3)	GO:0000166	nucleotide binding	MF	IEA	4.6764e-8	4.0972e-06	AFUA_1G03420	GTP:AMP phosphotransferase, mitochondrial (EC 2.7.4.10) (Adenylate kinase 3)	01.03.04	pyrimidine nucleotide/nucleoside/nucleobase metabolism	Metabolism	0.00014037	0.0049037
AFUA_3G08050	C6 transcription factor (OTam), putative	19.1782	141.241	7.36468		C6 transcription factor (OTam), putative	GO:0005634	nucleus	CC	IEA	0.0001011	0.0047979	AFUA_3G08050	#N/A	#N/A	#N/A	#N/A	#N/A	#N/A
AFUA_2G02760	protein-tyrosine phosphatase, putative	7.29609	52.3194	7.17088		Protein-tyrosine phosphatase, putative	GO:0016311	dephosphorylation	BP	IEA	0.10571	0.39346	AFUA_2G02760	Protein-tyrosine phosphatase, putative	12.01	ribosome biogenesis	Protein synthesis	1.2044e-23	2.1036e-21
AFUA_4G12990	thioredoxin reductase Trr1/Trr2, putative	24.0418	170.537	7.09335		Thioredoxin reductase (EC 1.8.1.9)	GO:0005737	cytoplasm	CC	IEA	1.6768e-15	3.8197e-13	AFUA_4G12990	Thioredoxin reductase (EC 1.8.1.9)	01.03.07	deoxyribonucleotide metabolism	Metabolism	0.016896	0.19246
AFUA_3G11930	NAD binding Rossmann fold oxidoreductase, putative	2.28223	15.9233	6.97707		#N/A	#N/A	#N/A	#N/A	#N/A	#N/A	#N/A	AFUA_3G11930	#N/A	#N/A	#N/A	#N/A	#N/A	#N/A
AFUA_5G06653	conserved hypothetical protein	5.39911	37.6699	6.97707		#N/A	#N/A	#N/A	#N/A	#N/A	#N/A	#N/A	AFUA_5G06653	#N/A	#N/A	#N/A	#N/A	#N/A	#N/A
AFUA_5G08510	dynein family protein	3.06767	21.4034	6.97707		Dynein family protein	GO:0005868	cytoplasmic dynein complex	CC	IEA	0.18144	0.39346	AFUA_5G08510	Dynein family protein	16.01	protein binding	Protein with binding function or cofactor requirement (structural or analytic)	3.3908e-18	4.442e-16
AFUA_6G04490	camp independent regulatory protein	1.96433	13.7053	6.97707		#N/A	#N/A	#N/A	#N/A	#N/A	#N/A	#N/A	AFUA_6G04490	#N/A	#N/A	#N/A	#N/A	#N/A	#N/A
AFUA_1G02020	SWIB/MDM2 domain protein	6.56142	45.7794	6.97707		SWIB/MDM2 domain protein (EC 5.99.1.2)	GO:0003917	DNA topoisomerase type I activity	MF	IEA	0.086781	0.39346	AFUA_1G02020	SWIB/MDM2 domain protein (EC 5.99.1.2)	16.03.03	RNA binding	Protein with binding function or cofactor requirement (structural or analytic)	3.4798e-11	3.6468e-9
AFUA_4G08650	GPI-anchored cell surface glycoprotein, putative	3.22106	22.4735	6.97707		#N/A	#N/A	#N/A	#N/A	#N/A	#N/A	#N/A	AFUA_4G08650	#N/A	#N/A	#N/A	#N/A	#N/A	#N/A
AFUA_4G08070	peptide N-myristoyl transferase (Nmt1)	19.1652	133.717	6.97707		Glycylpeptide N-tetradecanoyltransferase (EC 2.3.1.97) (Myristoyl-CoA:protein N-myristoyltransferase) (NMT) (Peptide N-myristoyltransferase)	GO:0005737	cytoplasm	CC	IEA	1.6768e-15	3.8197e-13	AFUA_4G08070	#N/A	#N/A	#N/A	#N/A	#N/A	#N/A
AFUA_7G02300	conserved hypothetical protein	3.76432	26.2639	6.97707		Uncharacterized protein	GO:0006750	glutathione biosynthetic process	BP	IEA	0.22517	0.44995	AFUA_7G02300	#N/A	#N/A	#N/A	#N/A	#N/A	#N/A
AFUA_3G14500	isochorismatase family protein family	3.41922	23.8561	6.97707		Isochorismatase family protein family	GO:0003824	catalytic activity	MF	IEA	0.13802	0.39346	AFUA_3G14500	Isochorismatase family protein family	01.03.16	polynucleotide degradation	Metabolism	0.027233	0.25035
AFUA_2G06290	nuclear division Rft1 protein, putative	3.60627	25.1612	6.97707		#N/A	#N/A	#N/A	#N/A	#N/A	#N/A	#N/A	AFUA_2G06290	Nuclear division Rft1 protein, putative	10.03.01	mitotic cell cycle and cell cycle control	Cell cycle and DNA processing	0.0061608	0.089674
AFUA_1G10900	conserved hypothetical protein	2.16211	15.0852	6.97707		#N/A	#N/A	#N/A	#N/A	#N/A	#N/A	#N/A	AFUA_1G10900	#N/A	#N/A	#N/A	#N/A	#N/A	#N/A
AFUA_1G15880	DUF803 domain membrane protein	7.40087	51.6363	6.97707		DUF803 domain membrane protein	GO:0016020	membrane	CC	IEA	0.034267	0.30346	AFUA_1G15880	DUF803 domain membrane protein	16.01	protein binding	Protein with binding function or cofactor requirement (structural or analytic)	3.3908e-18	4.442e-16
AFUA_4G09620	WD repeat protein	1.94412	13.5643	6.97707		#N/A	#N/A	#N/A	#N/A	#N/A	#N/A	#N/A	AFUA_4G09620	WD repeat protein	16.01	protein binding	Protein with binding function or cofactor requirement (structural or analytic)	3.3908e-18	4.442e-16
AFUA_6G03230	cell wall glucanase/allergen F16-like	2.63923	18.4141	6.97707		Cell wall glucanase/allergen F16-like (EC 3.2.1.-)	GO:0009277	fungal-type cell wall	CC	IDA	0.070697	0.39346	AFUA_6G03230	#N/A	#N/A	#N/A	#N/A	#N/A	#N/A
AFUA_1G05020	sulfate transporter, putative	1.1142	7.77387	6.97707		Sulfate transporter, putative	GO:0016020	membrane	CC	IEA	0.034267	0.30346	AFUA_1G05020	Sulfate transporter, putative	1.01	amino acid metabolism	Metabolism	0.0021875	0.042454
AFUA_6G11200	DENN (AEX-3) domain protein	1.03829	7.24422	6.97707		#N/A	#N/A	#N/A	#N/A	#N/A	#N/A	#N/A	AFUA_6G11200	#N/A	#N/A	#N/A	#N/A	#N/A	#N/A
AFUA_7G04860	dimethyladenosine transferase	12.0209	81.0751	6.7445		Dimethyladenosine transferase (EC 2.1.1.-)	GO:0016740	transferase activity	MF	IEA	1.5877e-06	9.5178e-05	AFUA_7G04860	Dimethyladenosine transferase (EC 2.1.1.-)	12.01	ribosome biogenesis	Protein synthesis	1.2044e-23	2.1036e-21
AFUA_4G07360	cobalamin-independent methionine synthase MetH/D	64.6151	435.23	6.73572		Cobalamin-independent methionine synthase MetH/D (EC 2.1.1.14)	GO:0008652	cellular amino acid biosynthetic process	BP	IEA	1.1386e-7	9.2636e-06	AFUA_4G07360	Cobalamin-independent methionine synthase MetH/D (EC 2.1.1.14)	1.01	amino acid metabolism	Metabolism	0.0021875	0.042454
AFUA_8G04370	GPI anchored protein, putative	55.3287	371.185	6.70872		#N/A	#N/A	#N/A	#N/A	#N/A	#N/A	#N/A	AFUA_8G04370	#N/A	#N/A	#N/A	#N/A	#N/A	#N/A
AFUA_6G03570	beta-glucosidase, putative	3.6551	24.4393	6.68636		Probable beta-glucosidase E (EC 3.2.1.21) (Beta-D-glucoside glucohydrolase E) (Cellobiase E) (Gentiobiase E)	GO:0016020	membrane	CC	IEA	0.034267	0.30346	AFUA_6G03570	#N/A	#N/A	#N/A	#N/A	#N/A	#N/A
AFUA_6G08610	RNA methylase family protein, putative	15.8133	105.733	6.68636		RNA methylase family protein, putative	GO:0009452	7-methylguanosine RNA capping	BP	IEA	0.18144	0.39346	AFUA_6G08610	RNA methylase family protein, putative	16.01	protein binding	Protein with binding function or cofactor requirement (structural or analytic)	3.3908e-18	4.442e-16
AFUA_6G07080	nucleolar protein Jip5, putative	15.8607	105.392	6.64483		WD repeat-containing protein jip5	GO:0005634	nucleus	CC	IEA	0.0001011	0.0047979	AFUA_6G07080	#N/A	#N/A	#N/A	#N/A	#N/A	#N/A
AFUA_5G11310	MHYT domain signalling protein, putative	3.62009	23.8544	6.58945		#N/A	#N/A	#N/A	#N/A	#N/A	#N/A	#N/A	AFUA_5G11310	#N/A	#N/A	#N/A	#N/A	#N/A	#N/A
AFUA_5G02910	NAP family protein	42.5845	278.545	6.541		NAP family protein	GO:0005634	nucleus	CC	IEA	0.0001011	0.0047979	AFUA_5G02910	#N/A	#N/A	#N/A	#N/A	#N/A	#N/A
AFUA_3G10140	ubiquinone/menaquinone biosynthesis-related protein	14.0497	89.8571	6.39565		#N/A	#N/A	#N/A	#N/A	#N/A	#N/A	#N/A	AFUA_3G10140	#N/A	#N/A	#N/A	#N/A	#N/A	#N/A
AFUA_6G10490	conserved hypothetical protein	4.27531	27.3434	6.39565		Uncharacterized protein	GO:0006260	DNA replication	BP	IEA	0.00040023	0.015674	AFUA_6G10490	#N/A	#N/A	#N/A	#N/A	#N/A	#N/A
AFUA_3G13270	phosphatidate cytidylyltransferase, putative	4.88291	31.2294	6.39565		Phosphatidate cytidylyltransferase, putative (EC 2.7.7.41)	GO:0016740	transferase activity	MF	IEA	1.5877e-06	9.5178e-05	AFUA_3G13270	#N/A	#N/A	#N/A	#N/A	#N/A	#N/A
AFUA_2G13260	transcriptional regulator Medusa	2.7627	17.6693	6.39565		Transcriptional regulator Medusa	GO:0005634	nucleus	CC	IDA	0.0001011	0.0047979	AFUA_2G13260	#N/A	#N/A	#N/A	#N/A	#N/A	#N/A
AFUA_1G02360	C2H2 type zinc finger domain protein	2.64292	16.9032	6.39565		C2H2 type zinc finger domain protein	GO:0003676	nucleic acid binding	MF	IEA	5.9209e-10	8.4299e-8	AFUA_1G02360	#N/A	#N/A	#N/A	#N/A	#N/A	#N/A
AFUA_5G11710	conserved hypothetical protein	3.22472	20.6242	6.39565		#N/A	#N/A	#N/A	#N/A	#N/A	#N/A	#N/A	AFUA_5G11710	#N/A	#N/A	#N/A	#N/A	#N/A	#N/A
AFUA_5G13090	alpha-1,2-mannosyltransferase, putative	3.83304	24.5148	6.39565		Alpha-1,2-mannosyltransferase, putative	GO:0016740	transferase activity	MF	IEA	1.5877e-06	9.5178e-05	AFUA_5G13090	Alpha-1,2-mannosyltransferase, putative	40.01	cell growth / morphogenesis	Cell fate	0.035498	0.30001
AFUA_5G12302	conserved hypothetical protein	8.11721	50.9709	6.27936		#N/A	#N/A	#N/A	#N/A	#N/A	#N/A	#N/A	AFUA_5G12302	#N/A	#N/A	#N/A	#N/A	#N/A	#N/A
AFUA_8G04430	oligosaccharyl transferase subunit (Stt3), putative	7.61971	47.2562	6.20184		Oligosaccharyl transferase subunit (Stt3), putative	GO:0016740	transferase activity	MF	IEA	1.5877e-06	9.5178e-05	AFUA_8G04430	Oligosaccharyl transferase subunit (Stt3), putative	16.01	protein binding	Protein with binding function or cofactor requirement (structural or analytic)	3.3908e-18	4.442e-16
AFUA_3G14420	chitin synthase ChsG	6.21608	38.5511	6.20184		Chitin synthase G (EC 2.4.1.16) (Chitin-UDP acetyl-glucosaminyl transferase G) (Class-III chitin synthase G)	GO:0016740	transferase activity	MF	IEA	1.5877e-06	9.5178e-05	AFUA_3G14420	Chitin synthase G (EC 2.4.1.16) (Chitin-UDP acetyl-glucosaminyl transferase G) (Class-III chitin synthase G)	43.01.03.05	budding, cell polarity and filament formation	Cell type differentiation	0.0082809	0.10848
AFUA_3G09040	conserved hypothetical protein	14.3158	88.7844	6.20184		#N/A	#N/A	#N/A	#N/A	#N/A	#N/A	#N/A	AFUA_3G09040	#N/A	#N/A	#N/A	#N/A	#N/A	#N/A
AFUA_2G01050	mitochondrial intermembrane space translocase subunit Tim9, putative	103.829	639.906	6.16308		Mitochondrial import inner membrane translocase subunit tim9	GO:0015031	protein transport	BP	IEA	0.00015863	0.0069695	AFUA_2G01050	Mitochondrial import inner membrane translocase subunit tim9	16.01	protein binding	Protein with binding function or cofactor requirement (structural or analytic)	3.3908e-18	4.442e-16
AFUA_4G04520	succinyl-CoA synthetase beta subunit, putative	80.6833	493.801	6.12024		Succinyl-CoA synthetase beta subunit, putative (EC 6.2.1.4)	GO:0016874	ligase activity	MF	IEA	0.00041283	0.015674	AFUA_4G04520	Succinyl-CoA synthetase beta subunit, putative (EC 6.2.1.4)	16.01	protein binding	Protein with binding function or cofactor requirement (structural or analytic)	3.3908e-18	4.442e-16
AFUA_1G12740	conserved hypothetical protein	68.4669	414.005	6.04679		#N/A	#N/A	#N/A	#N/A	#N/A	#N/A	#N/A	AFUA_1G12740	#N/A	#N/A	#N/A	#N/A	#N/A	#N/A
AFUA_3G12300	60S ribosomal protein L22, putative	856.765	5046.6	5.8903		60S ribosomal protein L22, putative	GO:0006412	translation	BP	IEA	1.2444e-41	1.4174e-38	AFUA_3G12300	60S ribosomal protein L22, putative	12.01.01	ribosomal proteins	Protein synthesis	4.0609e-34	2.1279e-31
AFUA_4G08110	translation elongation factor G1, putative	31.7693	186.082	5.85729		Elongation factor G, mitochondrial (EF-Gmt) (Elongation factor G 1, mitochondrial) (mEF-G 1) (Elongation factor G1)	GO:0006412	translation	BP	IEA	1.2444e-41	1.4174e-38	AFUA_4G08110	Elongation factor G, mitochondrial (EF-Gmt) (Elongation factor G 1, mitochondrial) (mEF-G 1) (Elongation factor G1)	12.04.02	translation elongation	Protein synthesis	0.0074276	0.10519
AFUA_5G11860	DUF985 domain protein	4.47793	26.0357	5.81422		#N/A	#N/A	#N/A	#N/A	#N/A	#N/A	#N/A	AFUA_5G11860	#N/A	#N/A	#N/A	#N/A	#N/A	#N/A
AFUA_7G03900	conserved hypothetical protein	1.90109	11.0534	5.81422		#N/A	#N/A	#N/A	#N/A	#N/A	#N/A	#N/A	AFUA_7G03900	#N/A	#N/A	#N/A	#N/A	#N/A	#N/A
AFUA_2G17130	MAPKKK cascade protein kinase regulator Ste50	3.87231	22.5145	5.81422		MAPKKK cascade protein kinase regulator Ste50	GO:0007165	signal transduction	BP	IEA	0.008353	0.14866	AFUA_2G17130	MAPKKK cascade protein kinase regulator Ste50	43.01.03.05	budding, cell polarity and filament formation	Cell type differentiation	0.0082809	0.10848
AFUA_1G16810	aminotransferase, class III	3.96993	23.0821	5.81422		Aminotransferase, class III (EC 2.6.1.-)	GO:0016740	transferase activity	MF	IEA	1.5877e-06	9.5178e-05	AFUA_1G16810	Aminotransferase, class III (EC 2.6.1.-)	1.01	amino acid metabolism	Metabolism	0.0021875	0.042454
AFUA_1G08765	acetyltransferase, putative	3.79455	22.0624	5.81422		Acetyltransferase, putative	GO:0016740	transferase activity	MF	IEA	1.5877e-06	9.5178e-05	AFUA_1G08765	#N/A	#N/A	#N/A	#N/A	#N/A	#N/A
AFUA_5G08430	nuclear distribution protein RO10, putative	4.00358	23.2777	5.81422		#N/A	#N/A	#N/A	#N/A	#N/A	#N/A	#N/A	AFUA_5G08430	#N/A	#N/A	#N/A	#N/A	#N/A	#N/A
AFUA_4G00235	conserved hypothetical protein	35.8801	208.615	5.81422		#N/A	#N/A	#N/A	#N/A	#N/A	#N/A	#N/A	AFUA_4G00235	#N/A	#N/A	#N/A	#N/A	#N/A	#N/A
AFUA_1G09670	HLH transcription factor (GlcD gamma), putative	7.51367	43.6862	5.81422		HLH transcription factor (GlcD gamma), putative	GO:0046983	protein dimerization activity	MF	IEA	0.11418	0.39346	AFUA_1G09670	HLH transcription factor (GlcD gamma), putative	16.03.01	DNA binding	Protein with binding function or cofactor requirement (structural or analytic)	0.0014039	0.032604
AFUA_5G07940	conserved hypothetical protein	3.28071	19.0748	5.81422		#N/A	#N/A	#N/A	#N/A	#N/A	#N/A	#N/A	AFUA_5G07940	#N/A	#N/A	#N/A	#N/A	#N/A	#N/A
AFUA_5G11930	U1 small nuclear ribonucleoprotein, putative	18.454	107.296	5.81422		U1 small nuclear ribonucleoprotein, putative	GO:0030529	ribonucleoprotein complex	CC	IEA	2.4475e-27	6.9694e-25	AFUA_5G11930	U1 small nuclear ribonucleoprotein, putative	16.01	protein binding	Protein with binding function or cofactor requirement (structural or analytic)	3.3908e-18	4.442e-16
AFUA_4G12360	prefoldin subunit 1, putative	15.4892	90.0579	5.81422		Prefoldin subunit 1, putative	GO:0006457	protein folding	BP	IEA	0.00032855	0.013365	AFUA_4G12360	Prefoldin subunit 1, putative	14.01	protein folding and stabilization	Protein fate (folding, modification, destination)	0.0027757	0.050154
AFUA_5G03180	translation initiation factor eIF4E3, putative	16.2904	94.7161	5.81422		Translation initiation factor eIF4E3, putative	GO:0006412	translation	BP	IEA	1.2444e-41	1.4174e-38	AFUA_5G03180	Translation initiation factor eIF4E3, putative	12.04	translation	Protein synthesis	3.1078e-24	8.1425e-22
AFUA_4G12800	puatative oxidoreductase	10.0873	58.6498	5.81422		Puatative oxidoreductase (EC 1.14.13.-)	GO:0042602	riboflavin reductase (NADPH) activity	MF	IEA	0.086781	0.39346	AFUA_4G12800	#N/A	#N/A	#N/A	#N/A	#N/A	#N/A
AFUA_2G04400	conserved hypothetical protein	4.32753	25.1612	5.81422		#N/A	#N/A	#N/A	#N/A	#N/A	#N/A	#N/A	AFUA_2G04400	Uncharacterized protein	41.01.01	mating (fertilization)	Development (systematic)	0.030902	0.26987
AFUA_1G04980	RNA polymerase III transcription factor TFIIIC subunit (Tfc4), putative	2.58625	15.037	5.81422		#N/A	#N/A	#N/A	#N/A	#N/A	#N/A	#N/A	AFUA_1G04980	RNA polymerase III transcription factor TFIIIC subunit (Tfc4), putative	11.02.01	rRNA synthesis	Transcription	6.5165e-05	0.0026266
AFUA_1G11535	conserved hypothetical protein	9.08504	52.8224	5.81422		#N/A	#N/A	#N/A	#N/A	#N/A	#N/A	#N/A	AFUA_1G11535	#N/A	#N/A	#N/A	#N/A	#N/A	#N/A
AFUA_1G13950	short-chain oxidoreductase, putative	3.28071	19.0748	5.81422		#N/A	#N/A	#N/A	#N/A	#N/A	#N/A	#N/A	AFUA_1G13950	#N/A	#N/A	#N/A	#N/A	#N/A	#N/A
AFUA_2G04750	conserved hypothetical protein	1.46035	8.49078	5.81422		#N/A	#N/A	#N/A	#N/A	#N/A	#N/A	#N/A	AFUA_2G04750	#N/A	#N/A	#N/A	#N/A	#N/A	#N/A
AFUA_2G06130	fungal specific transcription factor, putative	1.44915	8.42566	5.81422		Fungal specific transcription factor, putative	GO:0005634	nucleus	CC	IEA	0.0001011	0.0047979	AFUA_2G06130	#N/A	#N/A	#N/A	#N/A	#N/A	#N/A
AFUA_3G14040	RNA polymerase II mediator complex subunit Soh1, putative	5.79659	33.7027	5.81422		Mediator of RNA polymerase II transcription subunit 31 (Mediator complex subunit 31)	GO:0005634	nucleus	CC	IEA	0.0001011	0.0047979	AFUA_3G14040	Mediator of RNA polymerase II transcription subunit 31 (Mediator complex subunit 31)	16.01	protein binding	Protein with binding function or cofactor requirement (structural or analytic)	3.3908e-18	4.442e-16
AFUA_4G06540	CHL4 family chromosome segregation protein, putative	2.00604	11.6636	5.81422		CHL4 family chromosome segregation protein, putative	GO:0007059	chromosome segregation	BP	IEA	0.044607	0.34563	AFUA_4G06540	CHL4 family chromosome segregation protein, putative	16.03.01	DNA binding	Protein with binding function or cofactor requirement (structural or analytic)	0.0014039	0.032604
AFUA_4G09120	GTPase activating protein for Arf, putative	2.89386	16.8255	5.81422		GTPase activating protein for Arf, putative	GO:0046872	metal ion binding	MF	IEA	0.18261	0.39467	AFUA_4G09120	GTPase activating protein for Arf, putative	20.09.07.03	ER to Golgi transport	Cellular transport, transport facilitation and transport routes	0.0014311	0.032604
AFUA_4G11380	hypothetical protein	10.1596	59.0703	5.81422		#N/A	#N/A	#N/A	#N/A	#N/A	#N/A	#N/A	AFUA_4G11380	#N/A	#N/A	#N/A	#N/A	#N/A	#N/A
AFUA_1G02490	conserved hypothetical protein	3.6693	21.3341	5.81422		#N/A	#N/A	#N/A	#N/A	#N/A	#N/A	#N/A	AFUA_1G02490	#N/A	#N/A	#N/A	#N/A	#N/A	#N/A
AFUA_8G05340	signal peptidase complex component, putative	4.60899	26.7977	5.81422		#N/A	#N/A	#N/A	#N/A	#N/A	#N/A	#N/A	AFUA_8G05340	#N/A	#N/A	#N/A	#N/A	#N/A	#N/A
AFUA_6G03350	GNAT family N-acetyltransferase, putative	31.1487	181.106	5.81422		GNAT family N-acetyltransferase, putative (EC 3.2.1.-)	GO:0016740	transferase activity	MF	IEA	1.5877e-06	9.5178e-05	AFUA_6G03350	#N/A	#N/A	#N/A	#N/A	#N/A	#N/A
AFUA_1G17100	conserved hypothetical protein	10.2145	59.3896	5.81422		#N/A	#N/A	#N/A	#N/A	#N/A	#N/A	#N/A	AFUA_1G17100	#N/A	#N/A	#N/A	#N/A	#N/A	#N/A
AFUA_6G06990	von Willebrand and RING finger domain protein	1.82051	10.5848	5.81422		von Willebrand and RING finger domain protein	GO:0046872	metal ion binding	MF	IEA	0.18261	0.39467	AFUA_6G06990	#N/A	#N/A	#N/A	#N/A	#N/A	#N/A
AFUA_4G06990	amino acid transporter, putative	1.96433	11.4211	5.81422		Amino acid transporter, putative	GO:0016020	membrane	CC	IEA	0.034267	0.30346	AFUA_4G06990	#N/A	#N/A	#N/A	#N/A	#N/A	#N/A
AFUA_2G03260	RNA binding protein (Rbm8A), putative	41.5969	241.854	5.81422		RNA binding protein (Rbm8A), putative	GO:0005737	cytoplasm	CC	IEA	1.6768e-15	3.8197e-13	AFUA_2G03260	RNA binding protein (Rbm8A), putative	16.01	protein binding	Protein with binding function or cofactor requirement (structural or analytic)	3.3908e-18	4.442e-16
AFUA_5G11500	conserved hypothetical protein	1.62904	9.47161	5.81422		Uncharacterized protein	GO:0016311	dephosphorylation	BP	IEA	0.10571	0.39346	AFUA_5G11500	#N/A	#N/A	#N/A	#N/A	#N/A	#N/A
AFUA_7G01470	integral membrane protein, Mpv17/PMP22 family, putative	5.27846	30.6901	5.81422		#N/A	#N/A	#N/A	#N/A	#N/A	#N/A	#N/A	AFUA_7G01470	Integral membrane protein, Mpv17/PMP22 family, putative	42.19	peroxisome	Biogenesis of cellular components	0.01736	0.19354
AFUA_7G05030	pectin lyase B	2.51288	14.6105	5.81422		#N/A	#N/A	#N/A	#N/A	#N/A	#N/A	#N/A	AFUA_7G05030	#N/A	#N/A	#N/A	#N/A	#N/A	#N/A
AFUA_3G12700	DUF250 domain membrane protein	18.9442	107.392	5.66887		DUF250 domain membrane protein	GO:0016020	membrane	CC	IEA	0.034267	0.30346	AFUA_3G12700	#N/A	#N/A	#N/A	#N/A	#N/A	#N/A
AFUA_2G17610	sulfatase domain protein	17.0051	96.3995	5.66887		Sulfatase domain protein	GO:0003824	catalytic activity	MF	IEA	0.13802	0.39346	AFUA_2G17610	#N/A	#N/A	#N/A	#N/A	#N/A	#N/A
AFUA_2G04800	pre-rRNA processing protein, putative	27.9264	156.958	5.62042		#N/A	#N/A	#N/A	#N/A	#N/A	#N/A	#N/A	AFUA_2G04800	Pre-rRNA processing protein, putative	11.04.01	rRNA processing	Transcription	1.9287e-06	0.00012633
AFUA_4G09800	SYF2 splicing factor family protein	15.6951	87.6045	5.58166		Pre-mRNA-splicing factor syf2	GO:0005634	nucleus	CC	IEA	0.0001011	0.0047979	AFUA_4G09800	Pre-mRNA-splicing factor syf2	16.01	protein binding	Protein with binding function or cofactor requirement (structural or analytic)	3.3908e-18	4.442e-16
AFUA_1G11960	alternative NADH-dehydrogenase	48.4936	269.22	5.55165		#N/A	#N/A	#N/A	#N/A	#N/A	#N/A	#N/A	AFUA_1G11960	Alternative NADH-dehydrogenase (EC 1.6.99.3)	42.16	mitochondrion	Biogenesis of cellular components	4.6977e-05	0.0020513
AFUA_1G07630	zinc knuckle domain protein (Byr3), putative	138.511	765.068	5.52351		Zinc knuckle domain protein (Byr3), putative	GO:0003676	nucleic acid binding	MF	IEA	5.9209e-10	8.4299e-8	AFUA_1G07630	Zinc knuckle domain protein (Byr3), putative	12.01	ribosome biogenesis	Protein synthesis	1.2044e-23	2.1036e-21
AFUA_5G13490	mitochondrial ribosomal protein L43, putative	54.7736	302.542	5.52351		Mitochondrial ribosomal protein L43, putative	GO:0005840	ribosome	CC	IEA	1.7787e-39	1.013e-36	AFUA_5G13490	Mitochondrial ribosomal protein L43, putative	12.01.01	ribosomal proteins	Protein synthesis	4.0609e-34	2.1279e-31
AFUA_5G11120	DNA-directed RNA polymerases i, ii, and iii 145 kDa polypeptide	25.8861	142.982	5.52351		DNA-directed RNA polymerases i, ii, and iii 145 kDa polypeptide	GO:0003899	DNA-directed RNA polymerase activity	MF	IEA	4.6314e-06	0.0002512	AFUA_5G11120	DNA-directed RNA polymerases i, ii, and iii 145 kDa polypeptide	16.01	protein binding	Protein with binding function or cofactor requirement (structural or analytic)	3.3908e-18	4.442e-16
AFUA_6G08870	nicotinamide mononucleotide adenylyl transferase	13.0774	72.2333	5.52351		Nicotinamide mononucleotide adenylyl transferase	GO:0016740	transferase activity	MF	IEA	1.5877e-06	9.5178e-05	AFUA_6G08870	Nicotinamide mononucleotide adenylyl transferase	16.01	protein binding	Protein with binding function or cofactor requirement (structural or analytic)	3.3908e-18	4.442e-16
AFUA_6G12550	mitochondrial carrier protein, putative	13.4978	74.5551	5.52351		Mitochondrial carrier protein, putative	GO:0006810	transport	BP	IEA	0.022991	0.29509	AFUA_6G12550	Mitochondrial carrier protein, putative	20.09.04	mitochondrial transport	Cellular transport, transport facilitation and transport routes	0.00031076	0.0095786
AFUA_2G09630	conserved hypothetical protein	6.05669	33.4542	5.52351		#N/A	#N/A	#N/A	#N/A	#N/A	#N/A	#N/A	AFUA_2G09630	#N/A	#N/A	#N/A	#N/A	#N/A	#N/A
AFUA_2G08750	mitochondrial inner membrane nuclease Nuc1, putative	11.0832	61.2183	5.52351		Mitochondrial inner membrane nuclease Nuc1, putative (EC 3.1.30.-)	GO:0003676	nucleic acid binding	MF	IEA	5.9209e-10	8.4299e-8	AFUA_2G08750	Mitochondrial inner membrane nuclease Nuc1, putative (EC 3.1.30.-)	16.03.03	RNA binding	Protein with binding function or cofactor requirement (structural or analytic)	3.4798e-11	3.6468e-9
AFUA_3G10260	DASH complex subunit Duo1, putative	11.0724	60.0855	5.42661		DASH complex subunit Duo1, putative	GO:0007067	mitotic nuclear division	BP	IEA	0.069914	0.39346	AFUA_3G10260	#N/A	#N/A	#N/A	#N/A	#N/A	#N/A
AFUA_1G08850	septin	16.3374	88.6564	5.42661		Septin	GO:0000166	nucleotide binding	MF	IEA	4.6764e-8	4.0972e-06	AFUA_1G08850	Septin	16.01	protein binding	Protein with binding function or cofactor requirement (structural or analytic)	3.3908e-18	4.442e-16
AFUA_6G12522	stress response transcription factor SrrA/Skn7, putative	4.54981	24.69	5.42661		Stress response transcription factor SrrA/Skn7, putative (EC 2.7.3.-)	GO:0016740	transferase activity	MF	IEA	1.5877e-06	9.5178e-05	AFUA_6G12522	Stress response transcription factor SrrA/Skn7, putative (EC 2.7.3.-)	16.01	protein binding	Protein with binding function or cofactor requirement (structural or analytic)	3.3908e-18	4.442e-16
AFUA_4G13140	conserved hypothetical protein	26.9955	146.494	5.42661		#N/A	#N/A	#N/A	#N/A	#N/A	#N/A	#N/A	AFUA_4G13140	#N/A	#N/A	#N/A	#N/A	#N/A	#N/A
AFUA_6G06810	conserved hypothetical protein	5.46152	29.6376	5.42661		#N/A	#N/A	#N/A	#N/A	#N/A	#N/A	#N/A	AFUA_6G06810	#N/A	#N/A	#N/A	#N/A	#N/A	#N/A
AFUA_6G04730	bifunctional purine biosynthetic protein Ade1, putative	42.7374	231.024	5.40566		Bifunctional purine biosynthetic protein Ade1, putative (EC 6.3.4.13)	GO:0005737	cytoplasm	CC	IEA	1.6768e-15	3.8197e-13	AFUA_6G04730	Bifunctional purine biosynthetic protein Ade1, putative (EC 6.3.4.13)	01.03.01.03	purine nucleotide/nucleoside/nucleobase anabolism	Metabolism	6.9042e-9	6.0297e-7
AFUA_4G05830	translation initiation factor, putative	26.7868	144.418	5.39137		Methylthioribose-1-phosphate isomerase (M1Pi) (MTR-1-P isomerase) (EC 5.3.1.23) (S-methyl-5-thioribose-1-phosphate isomerase) (Translation initiation factor eIF-2B subunit alpha/beta/delta-like protein)	GO:0005737	cytoplasm	CC	IEA	1.6768e-15	3.8197e-13	AFUA_4G05830	Methylthioribose-1-phosphate isomerase (M1Pi) (MTR-1-P isomerase) (EC 5.3.1.23) (S-methyl-5-thioribose-1-phosphate isomerase) (Translation initiation factor eIF-2B subunit alpha/beta/delta-like protein)	12.04	translation	Protein synthesis	3.1078e-24	8.1425e-22
AFUA_4G10280	phosphotransmitter protein Ypd1, putative	43.9462	236.35	5.37816		#N/A	#N/A	#N/A	#N/A	#N/A	#N/A	#N/A	AFUA_4G10280	Phosphotransmitter protein Ypd1, putative	16.01	protein binding	Protein with binding function or cofactor requirement (structural or analytic)	3.3908e-18	4.442e-16
AFUA_4G10790	phosphoribosyl diphosphate synthase isoform 4	20.6041	109.528	5.31586		Phosphoribosyl diphosphate synthase isoform 4	GO:0044249	cellular biosynthetic process	BP	IEA	0.0059641	0.11191	AFUA_4G10790	Phosphoribosyl diphosphate synthase isoform 4	01.03.01.03	purine nucleotide/nucleoside/nucleobase anabolism	Metabolism	6.9042e-9	6.0297e-7
AFUA_8G03930	Hsp70 chaperone (HscA), putative	304.194	1615.01	5.30915		Hsp70 chaperone (HscA), putative	GO:0005622	intracellular	CC	IDA	1.5908e-10	2.5884e-8	AFUA_8G03930	Hsp70 chaperone (HscA), putative	16.01	protein binding	Protein with binding function or cofactor requirement (structural or analytic)	3.3908e-18	4.442e-16
AFUA_2G14130	ubiquitin C-terminal hydrolase, putative	8.91888	47.3189	5.30548		Ubiquitin carboxyl-terminal hydrolase (EC 3.4.19.12)	GO:0036459	ubiquitinyl hydrolase activity	MF	IEA	0.11966	0.39346	AFUA_2G14130	#N/A	#N/A	#N/A	#N/A	#N/A	#N/A
AFUA_7G01480	cap binding protein	77.2735	408.441	5.28566		Cap binding protein	GO:0006412	translation	BP	IEA	1.2444e-41	1.4174e-38	AFUA_7G01480	Cap binding protein	12.04	translation	Protein synthesis	3.1078e-24	8.1425e-22
AFUA_1G14550	Mn superoxide dismutase MnSOD	125.382	661.307	5.27433		Superoxide dismutase [Mn], mitochondrial (EC 1.15.1.1) (allergen Asp f 6)	GO:0005622	intracellular	CC	IDA	1.5908e-10	2.5884e-8	AFUA_1G14550	#N/A	#N/A	#N/A	#N/A	#N/A	#N/A
AFUA_6G03970	cell cycle checkpoint protein (Hus1), putative	5.05264	26.4395	5.2328		Cell cycle checkpoint protein (Hus1), putative	GO:0005730	nucleolus	CC	IEA	0.015887	0.25487	AFUA_6G03970	#N/A	#N/A	#N/A	#N/A	#N/A	#N/A
AFUA_8G04350	DNA-directed RNA polymerase III subunit 22.9 kDa, putative	16.7229	87.5076	5.2328		DNA-directed RNA polymerase III subunit 22.9 kDa, putative (EC 2.7.7.6)	GO:0016740	transferase activity	MF	IEA	1.5877e-06	9.5178e-05	AFUA_8G04350	DNA-directed RNA polymerase III subunit 22.9 kDa, putative (EC 2.7.7.6)	16.01	protein binding	Protein with binding function or cofactor requirement (structural or analytic)	3.3908e-18	4.442e-16
AFUA_4G08570	regulatory protein Ral2, putative	8.4267	44.0953	5.2328		#N/A	#N/A	#N/A	#N/A	#N/A	#N/A	#N/A	AFUA_4G08570	Regulatory protein Ral2, putative	16.01	protein binding	Protein with binding function or cofactor requirement (structural or analytic)	3.3908e-18	4.442e-16
AFUA_1G06460	BCAS2 family protein	17.4165	91.137	5.2328		BCAS2 family protein	GO:0006397	mRNA processing	BP	IEA	0.0052674	0.11191	AFUA_1G06460	BCAS2 family protein	16.01	protein binding	Protein with binding function or cofactor requirement (structural or analytic)	3.3908e-18	4.442e-16
AFUA_1G16553	conserved hypothetical protein	8.70824	45.5685	5.2328		Uncharacterized protein	GO:0051382	kinetochore assembly	BP	IEA	0.044607	0.34563	AFUA_1G16553	#N/A	#N/A	#N/A	#N/A	#N/A	#N/A
[truncated: 1,593 more rows]

## Sheet: TableS2C
	41362 6days down		Expression value			GO analysis								FunCat
[truncated: 1,521 more rows]

[truncated: 5 more sheets: TableS2D, TableS2E, TableS2F, TableS2G, TableS2H]
